# Supplementary material for: Alkynol natural products target ALDH2 in cancer cells by irreversible binding to the active site
Source: Royal Society of Chemistry journal article supplement (doi:10.1039/c5cc06424d), 2015-01-01
Supplement: c5cc06424d1.zip [file c5cc06424d1.zip]

## Sheet: Protein groups_T-Test
Protein	Gene name	Mol. weight [kDa]	-Log t-test p-value	t-test log2 ratio FL2P/DMSO	log2 Ratio (FL2P/DMSO)_R1	log2 Ratio (FL2P/DMSO)_R2	log2 Ratio (FL2P/DMSO)_R3	rank log2 ratio FL2P/DMSO	Intensity	Intensity DMSO	Intensity FL2P	Intensity R1	Intensity DMSO R1	Intensity FL2P R1	Intensity R2	Intensity DMSO R2	Intensity FL2P R2	Intensity R3	Intensity DMSO R3	Intensity FL2P R3	Unique peptides R1	Unique peptides R2	Unique peptides R3	Sequence coverage [%]	Sequence coverage R1 [%]	Sequence coverage R2 [%]	Sequence coverage R3 [%]	Fasta headers
Aldehyde dehydrogenase, mitochondrial OS	ALDH2	56.381	1.88519	1.91981	1.62035	2.35174	1.78735	852	2102300000	259950000	957310000	837570000	127020000	353510000	816240000	85305000	360810000	448530000	47633000	242990000	18	15	16	48.9	48.9	42.2	44.5	>sp|P05091|ALDH2_HUMAN Aldehyde dehydrogenase, mitochondrial OS=Homo sapiens GN=ALDH2 PE=1 SV=2;>tr|Q53FB6|Q53FB6_HUMAN Mitochondrial aldehyde dehydrogenase 2 variant (Fragment) OS=Homo sapiens PE=2 SV=1;>sp|P05091-2|ALDH2_HUMAN Isoform 2 of Aldehyde dehyd
HCG2010808, isoform CRA	MST065	15.521	1.74521	1.9225	1.52672	2.416	1.82477	853	171900000	17382000	71289000	44066000	6890700	13819000	97429000	7560400	42533000	30404000	2931300	14937000	4	5	3	51.4	51.4	51.4	43.7	>tr|Q549C5|Q549C5_HUMAN HCG2010808, isoform CRA_a OS=Homo sapiens GN=MST065 PE=2 SV=1;>sp|Q9NS69|TOM22_HUMAN Mitochondrial import receptor subunit TOM22 homolog OS=Homo sapiens GN=TOMM22 PE=1 SV=3;>tr|Q53GB0|Q53GB0_HUMAN Mitochondrial import receptor Tom22
HMOX2 protein OS	HMOX2	36.014	1.73351	1.74363	1.75916	2.15189	1.31985	848	256920000	39539000	128180000	85908000	18317000	35686000	100270000	11901000	53961000	70742000	9321100	38529000	7	8	8	44.3	31.6	40.2	37.7	>tr|Q6IBP2|Q6IBP2_HUMAN HMOX2 protein OS=Homo sapiens GN=HMOX2 PE=2 SV=1;>tr|B3KSE0|B3KSE0_HUMAN cDNA FLJ36069 fis, clone TESTI2019406, highly similar to HEME OXYGENASE 2 (EC 1.14.99.3) OS=Homo sapiens PE=2 SV=1;>sp|P30519|HMOX2_HUMAN Heme oxygenase 2 OS=H
Cytochrome b5 type B OS	CYB5B	16.694	1.48496	2.1082	1.84964	2.87682	1.59813	855	150920000	17905000	89924000	27339000	4861000	13129000	71766000	5308100	47776000	51817000	7736200	29019000	2	4	4	44.7	18	44.7	44.7	>tr|J3KNF8|J3KNF8_HUMAN Cytochrome b5 type B OS=Homo sapiens GN=CYB5B PE=1 SV=1;>tr|Q5HYD9|Q5HYD9_HUMAN Putative uncharacterized protein DKFZp686M0619 (Fragment) OS=Homo sapiens GN=DKFZp686M0619 PE=2 SV=1;>tr|D6RFH4|D6RFH4_HUMAN Cytochrome b5 type B OS=Hom
Serum paraoxonase/lactonase 3 OS	PON3	39.607	1.47969	2.65993	1.95587	3.61871	2.4052	856	289470000	20527000	139520000	45434000	8178600	19024000	197050000	8499600	97960000	46979000	3849000	22538000	3	8	4	29.9	12.7	29.9	16.1	>sp|Q15166|PON3_HUMAN Serum paraoxonase/lactonase 3 OS=Homo sapiens GN=PON3 PE=1 SV=3;>tr|F8WD41|F8WD41_HUMAN Serum paraoxonase/lactonase 3 OS=Homo sapiens GN=PON3 PE=1 SV=1;>tr|C9JZ99|C9JZ99_HUMAN Serum paraoxonase/lactonase 3 OS=Homo sapiens GN=PON3 PE=1
Cathepsin D (Lysosomal aspartyl peptidase), isoform CRA	HEL-S-130P	44.552	1.46161	4.36586	2.83019	5.69402	4.57337	857	4240500000	182690000	1700000000	948470000	58951000	448970000	2101200000	71061000	668280000	1190800000	52676000	582710000	13	12	11	40.8	39.1	38.6	32	>tr|V9HWI3|V9HWI3_HUMAN Cathepsin D (Lysosomal aspartyl peptidase), isoform CRA_a OS=Homo sapiens GN=HEL-S-130P PE=2 SV=1;>sp|P07339|CATD_HUMAN Cathepsin D OS=Homo sapiens GN=CTSD PE=1 SV=1;>tr|H7C469|H7C469_HUMAN Uncharacterized protein (Fragment) OS=Homo
RecQ protein-like (DNA helicase Q1-like), isoform CRA	RECQL	73.457	2.4753	-0.657824	-0.622621	-0.616791	-0.734059	30	115430000	29307000	18696000	83838000	16540000	9254800	12628000	5156800	3774000	18964000	7610100	5667300	4	3	4	8.6	7.2	5.4	6.8	>tr|A0A024RAV2|A0A024RAV2_HUMAN RecQ protein-like (DNA helicase Q1-like), isoform CRA_a OS=Homo sapiens GN=RECQL PE=4 SV=1;>sp|P46063|RECQ1_HUMAN ATP-dependent DNA helicase Q1 OS=Homo sapiens GN=RECQL PE=1 SV=3
cDNA, FLJ94136, highly similar to Homo sapiens synaptotagmin binding, cytoplasmic RNA interacting protein (SYNCRIP), mRNA OS		69.601	2.44607	-0.470538	-0.447839	-0.437115	-0.52666	108	1093500000	411650000	338400000	427090000	169250000	114100000	334720000	132340000	112590000	331700000	110060000	111710000	12	13	12	41.9	37.2	41.9	39.5	>tr|B2R8Z8|B2R8Z8_HUMAN cDNA, FLJ94136, highly similar to Homo sapiens synaptotagmin binding, cytoplasmic RNA interacting protein (SYNCRIP), mRNA OS=Homo sapiens PE=2 SV=1;>sp|O60506|HNRPQ_HUMAN Heterogeneous nuclear ribonucleoprotein Q OS=Homo sapiens GN=
cDNA, FLJ93750, Homo sapiens DEAD (Asp-Glu-Ala-Asp) box polypeptide 6 (DDX6), mRNA OS		53.216	2.37604	-0.677304	-0.695816	-0.742675	-0.59342	27	183710000	67259000	67184000	102240000	35504000	41790000	38077000	15812000	11863000	43392000	15943000	13530000	9	8	7	29.7	29.7	25.6	23.3	>tr|B2R858|B2R858_HUMAN cDNA, FLJ93750, Homo sapiens DEAD (Asp-Glu-Ala-Asp) box polypeptide 6 (DDX6), mRNA OS=Homo sapiens PE=2 SV=1;>sp|P26196|DDX6_HUMAN Probable ATP-dependent RNA helicase DDX6 OS=Homo sapiens GN=DDX6 PE=1 SV=2
Dinucleotide oxidase disulfide thiol exchanger 3 superfamily member 4 OS		74.518	2.30079	-0.0764173	-0.0834622	-0.0657477	-0.0800421	457	273310000	84907000	105910000	98102000	37460000	33153000	98089000	26507000	40197000	77117000	20940000	32555000	10	8	8	24.6	24.6	18.8	19.9	>tr|A0A024QYR3|A0A024QYR3_HUMAN Dinucleotide oxidase disulfide thiol exchanger 3 superfamily member 4 OS=Homo sapiens PE=2 SV=1;>sp|Q92544|TM9S4_HUMAN Transmembrane 9 superfamily member 4 OS=Homo sapiens GN=TM9SF4 PE=1 SV=2;>tr|B4DKC1|B4DKC1_HUMAN cDNA FLJ
Isoform 3 of Delta-1-pyrroline-5-carboxylate dehydrogenase, mitochondrial OS	ALDH4A1	56.042	2.24741	-0.118318	-0.102791	-0.133749	-0.118414	405	72326000	25193000	27075000	31104000	12395000	10976000	12212000	4100800	3757700	29009000	8696300	12341000	4	2	4	17.8	13.7	5.5	14.1	>sp|P30038-3|AL4A1_HUMAN Isoform 3 of Delta-1-pyrroline-5-carboxylate dehydrogenase, mitochondrial OS=Homo sapiens GN=ALDH4A1;>tr|A0A024RAD8|A0A024RAD8_HUMAN Aldehyde dehydrogenase 4 family, member A1, isoform CRA_a OS=Homo sapiens GN=ALDH4A1 PE=3 SV=1;>sp
Isoform 4 of Inhibitor of nuclear factor kappa-B kinase-interacting protein OS	IKBIP	43.083	2.15655	0.460382	0.534858	0.40523	0.441058	822	183030000	58303000	54096000	71917000	34752000	16135000	53159000	13234000	20898000	57949000	10317000	17064000	4	5	6	19.1	11.9	14.3	19.1	>sp|Q70UQ0-4|IKIP_HUMAN Isoform 4 of Inhibitor of nuclear factor kappa-B kinase-interacting protein OS=Homo sapiens GN=IKBIP
CROP protein (Fragment) OS	CROP	27.016	2.04495	-0.514242	-0.585107	-0.537843	-0.419777	85	46144000	16037000	14825000	16360000	5465400	4655100	16049000	5798000	5175500	13735000	4773600	4994800	3	3	3	15.3	15.3	15.3	15.3	>tr|Q6PKC2|Q6PKC2_HUMAN CROP protein (Fragment) OS=Homo sapiens GN=CROP PE=2 SV=1;>tr|Q86Y74|Q86Y74_HUMAN CROP protein (Fragment) OS=Homo sapiens GN=CROP PE=2 SV=1;>tr|B4DJ96|B4DJ96_HUMAN cDNA FLJ59548, highly similar to Cisplatin resistance-associated ove
Isoform 3 of Sodium/potassium-transporting ATPase subunit alpha-1 OS	ATP1A1	109.55	1.95579	0.233506	0.265437	0.250355	0.184725	782	1417900000	401220000	524980000	585030000	188200000	204360000	399430000	96573000	140230000	433400000	116450000	180390000	20	18	19	27	27	24.3	27	>sp|P05023-3|AT1A1_HUMAN Isoform 3 of Sodium/potassium-transporting ATPase subunit alpha-1 OS=Homo sapiens GN=ATP1A1;>tr|B7Z3V1|B7Z3V1_HUMAN cDNA FLJ60077, highly similar to Sodium/potassium-transporting ATPase alpha-1 chain (EC 3.6.3.9) (Fragment) OS=Homo
Prenylcysteine oxidase 1 OS	PCYOX1	56.639	1.91446	0.930414	1.04278	1.02503	0.723428	843	864680000	172130000	329690000	288760000	64215000	105330000	346450000	61856000	121250000	229470000	46054000	103100000	13	13	11	37.4	30.5	29.5	27.1	>sp|Q9UHG3|PCYOX_HUMAN Prenylcysteine oxidase 1 OS=Homo sapiens GN=PCYOX1 PE=1 SV=3;>tr|B7Z8A2|B7Z8A2_HUMAN cDNA FLJ51671, highly similar to Prenylcysteine oxidase (EC 1.8.3.5) OS=Homo sapiens PE=2 SV=1;>tr|Q584P1|Q584P1_HUMAN Putative uncharacterized prot
cDNA FLJ51656, highly similar to Actin-like protein 2 OS		39.029	1.82431	-0.20482	-0.154361	-0.234499	-0.225599	311	58186000	21389000	18498000	23857000	10019000	6864200	11530000	4483700	3443500	22799000	6887000	8190100	2	3	4	17.5	5.8	10.5	13.2	>tr|B4DHK9|B4DHK9_HUMAN cDNA FLJ51656, highly similar to Actin-like protein 2 OS=Homo sapiens PE=2 SV=1;>sp|P61160|ARP2_HUMAN Actin-related protein 2 OS=Homo sapiens GN=ACTR2 PE=1 SV=1;>tr|F5H6T1|F5H6T1_HUMAN ARP2 actin-related protein 2 homolog (Yeast), i
Chromosome 10 open reading frame 70, isoform CRA	C10orf70	12.199	1.79798	0.263054	0.203765	0.32008	0.265317	791	72132000	21440000	26161000	28846000	9705400	9159500	23417000	5796500	8432200	19869000	5937800	8568800	2	2	1	25.9	25.9	25.9	13.9	>tr|A0A024QZN7|A0A024QZN7_HUMAN Chromosome 10 open reading frame 70, isoform CRA_b OS=Homo sapiens GN=C10orf70 PE=4 SV=1;>sp|Q9NZ45|CISD1_HUMAN CDGSH iron-sulfur domain-containing protein 1 OS=Homo sapiens GN=CISD1 PE=1 SV=1
Serine/arginine-rich-splicing factor 3 OS	SRSF3	10.32	1.75789	-0.315111	-0.27514	-0.27073	-0.399464	220	162020000	56190000	51615000	65197000	24686000	19412000	43222000	13426000	13810000	53605000	18078000	18393000	2	2	2	31.6	31.6	31.6	31.6	>tr|A0A087X2D0|A0A087X2D0_HUMAN Serine/arginine-rich-splicing factor 3 OS=Homo sapiens GN=SRSF3 PE=4 SV=1;>sp|P84103-2|SRSF3_HUMAN Isoform 2 of Serine/arginine-rich splicing factor 3 OS=Homo sapiens GN=SRSF3;>tr|B2R6F3|B2R6F3_HUMAN Splicing factor arginine
SDHC protein OS	SDHC	18.602	1.72569	-0.223191	-0.269825	-0.164367	-0.235382	301	40537000	15179000	12745000	16636000	6742700	5027300	10737000	3520300	3137500	13164000	4915900	4580300	2	2	2	17.8	12.4	10.1	10.1	>tr|Q6IAQ2|Q6IAQ2_HUMAN SDHC protein OS=Homo sapiens GN=SDHC PE=2 SV=1;>sp|Q99643|C560_HUMAN Succinate dehydrogenase cytochrome b560 subunit, mitochondrial OS=Homo sapiens GN=SDHC PE=1 SV=1;>tr|D3DVH1|D3DVH1_HUMAN Succinate dehydrogenase complex, subunit C
Aldehyde dehydrogenase X, mitochondrial OS	ALDH1B1	57.206	1.68594	0.871154	0.766298	1.124	0.723165	841	680550000	143250000	270510000	273960000	71747000	106440000	197440000	29996000	66857000	209150000	41505000	97213000	7	7	7	21.1	18.8	19.1	19.1	>sp|P30837|AL1B1_HUMAN Aldehyde dehydrogenase X, mitochondrial OS=Homo sapiens GN=ALDH1B1 PE=1 SV=3;>tr|B4DLJ0|B4DLJ0_HUMAN cDNA FLJ51238, highly similar to Aldehyde dehydrogenase X, mitochondrial (EC 1.2.1.3) OS=Homo sapiens PE=2 SV=1
Minichromosome maintenance deficient protein 5 variant (Fragment) OS		82.236	1.66687	-0.338351	-0.412789	-0.360175	-0.242089	194	130230000	51174000	38798000	68062000	31072000	18279000	23491000	8746800	7499100	38673000	11356000	13020000	12	8	9	26.3	26.3	17.6	18.4	>tr|Q53FG5|Q53FG5_HUMAN Minichromosome maintenance deficient protein 5 variant (Fragment) OS=Homo sapiens PE=2 SV=1;>tr|B1AHB0|B1AHB0_HUMAN MCM5 minichromosome maintenance deficient 5, cell division cycle 46 (S. cerevisiae), isoform CRA_a OS=Homo sapiens G
Mitochondrial dynamin-like 120 kDa protein OS	OPA1	107.57	1.66083	0.179935	0.233888	0.14991	0.156008	764	147730000	43334000	55444000	58103000	19330000	19054000	31757000	8204600	11198000	57870000	15800000	25191000	6	6	9	15.8	10.4	8	14.7	>tr|E5KLK2|E5KLK2_HUMAN Mitochondrial dynamin-like 120 kDa protein OS=Homo sapiens GN=OPA1 PE=3 SV=1;>tr|E5KLK0|E5KLK0_HUMAN Mitochondrial dynamin-like 120 kDa protein OS=Homo sapiens GN=OPA1 PE=3 SV=1;>tr|E5KLM2|E5KLM2_HUMAN Mitochondrial dynamin-like 120
Reticulocalbin-2 OS	RCN2	36.876	1.62939	0.728764	0.662114	0.950319	0.573859	835	25335000	5113700	9229000	7245600	1505000	2850900	11691000	2073400	3682700	6398400	1535300	2695400	2	2	2	18.9	11.4	11.4	13.9	>sp|Q14257|RCN2_HUMAN Reticulocalbin-2 OS=Homo sapiens GN=RCN2 PE=1 SV=1;>sp|Q14257-2|RCN2_HUMAN Isoform 2 of Reticulocalbin-2 OS=Homo sapiens GN=RCN2;>tr|A8MXP8|A8MXP8_HUMAN Reticulocalbin-2 OS=Homo sapiens GN=RCN2 PE=1 SV=1
Epididymis secretory protein Li 21 OS	HEL-S-21	27.566	1.61194	1.457	1.46184	1.05269	1.85647	847	189380000	33101000	84688000	62997000	15009000	30971000	74822000	12371000	27289000	51565000	5720700	26428000	4	4	4	19.9	16.6	16.6	17	>tr|V9HWG9|V9HWG9_HUMAN Epididymis secretory protein Li 21 OS=Homo sapiens GN=HEL-S-21 PE=2 SV=1;>tr|B2R983|B2R983_HUMAN cDNA, FLJ94267, highly similar to Homo sapiens glutathione S-transferase omega 1 (GSTO1), mRNA OS=Homo sapiens PE=2 SV=1;>sp|P78417|GST
Large neutral amino acids transporter small subunit 1 OS	SLC7A5	55.01	1.59156	0.19898	0.138814	0.250234	0.207893	768	1265200000	375180000	460310000	498820000	161530000	163720000	356350000	96092000	124900000	410070000	117550000	171690000	4	1	3	12.6	12.6	4.9	10.8	>sp|Q01650|LAT1_HUMAN Large neutral amino acids transporter small subunit 1 OS=Homo sapiens GN=SLC7A5 PE=1 SV=2;>tr|Q96QB2|Q96QB2_HUMAN Sodium-independent neutral amino acid transporter LAT1 OS=Homo sapiens GN=lat1 PE=4 SV=1
cDNA, FLJ92658, highly similar to Homo sapiens poly (ADP-ribose) polymerase family, member 1 (PARP1), mRNA OS		113.08	1.5849	-0.342903	-0.2859	-0.455712	-0.287096	193	632840000	218280000	207640000	256660000	98719000	80594000	187980000	63551000	65758000	188200000	56009000	61287000	14	16	15	23.1	18	20	18.9	>tr|B2R5W3|B2R5W3_HUMAN cDNA, FLJ92658, highly similar to Homo sapiens poly (ADP-ribose) polymerase family, member 1 (PARP1), mRNA OS=Homo sapiens PE=2 SV=1;>tr|A0A024R3T8|A0A024R3T8_HUMAN Poly (ADP-ribose) polymerase family, member 1, isoform CRA_a OS=Hom
DNA damage-binding protein 2 (Fragment) OS	DDB2	25.086	1.5703	-0.225459	-0.300484	-0.195137	-0.180757	300	30740000	11215000	9195300	19952000	7751300	5691800	5343700	1835000	1529000	5444600	1628800	1974600	3	2	2	21.9	21.9	12.3	12.3	>tr|A0A087X0X5|A0A087X0X5_HUMAN DNA damage-binding protein 2 (Fragment) OS=Homo sapiens GN=DDB2 PE=4 SV=1;>sp|Q92466-5|DDB2_HUMAN Isoform D4 of DNA damage-binding protein 2 OS=Homo sapiens GN=DDB2;>sp|Q92466|DDB2_HUMAN DNA damage-binding protein 2 OS=Homo
NADPH--cytochrome P450 reductase OS	POR	76.689	1.56347	0.879848	0.759412	1.17517	0.70496	842	1806200000	360620000	716230000	540290000	136490000	191850000	714040000	115930000	281760000	551880000	108200000	242620000	18	21	23	40.8	36.2	38.4	40.8	>sp|P16435|NCPR_HUMAN NADPH--cytochrome P450 reductase OS=Homo sapiens GN=POR PE=1 SV=2;>tr|B2R6E5|B2R6E5_HUMAN NADPH--cytochrome P450 reductase OS=Homo sapiens PE=2 SV=1;>tr|A8K3B4|A8K3B4_HUMAN NADPH--cytochrome P450 reductase OS=Homo sapiens PE=2 SV=1;>t
ATP-dependent RNA helicase A OS	DHX9	140.96	1.56053	-0.227127	-0.182688	-0.194955	-0.303739	298	1798100000	653570000	594670000	895280000	360880000	284200000	377950000	131950000	132080000	524910000	160740000	178380000	26	24	26	31.7	30.2	26.4	29.2	>sp|Q08211|DHX9_HUMAN ATP-dependent RNA helicase A OS=Homo sapiens GN=DHX9 PE=1 SV=4
Zinc transporter 1 OS	SLC30A1	55.299	1.51102	0.661622	0.833011	0.718789	0.433066	833	183550000	42025000	73108000	58861000	15950000	21296000	68678000	12280000	24982000	56015000	13794000	26830000	5	5	7	23.3	12.2	12.8	21.1	>sp|Q9Y6M5|ZNT1_HUMAN Zinc transporter 1 OS=Homo sapiens GN=SLC30A1 PE=1 SV=3
Septin-2 OS		36.94	1.5031	-0.636887	-0.406063	-0.763514	-0.741083	36	57438000	22125000	16190000	18063000	6611700	4956100	15164000	6172000	4234100	24211000	9341100	6999600	3	4	5	34.9	13.4	20.2	27.7	>tr|B5MCX3|B5MCX3_HUMAN Septin-2 OS=Homo sapiens GN=SEPT2 PE=1 SV=1;>sp|Q15019|SEPT2_HUMAN Septin-2 OS=Homo sapiens GN=SEPT2 PE=1 SV=1;>sp|Q15019-3|SEPT2_HUMAN Isoform 3 of Septin-2 OS=Homo sapiens GN=SEPT2;>sp|Q15019-2|SEPT2_HUMAN Isoform 2 of Septin-2 OS
Acetolactate synthase-like protein OS	ILVBL	56.732	1.50098	0.795626	0.528371	1.02574	0.832769	837	43477000	9666900	17188000	19225000	5357100	5540400	8495300	1592000	3934400	15756000	2717800	7713200	3	2	3	12.4	12.4	7.8	12.4	>tr|M0R026|M0R026_HUMAN Acetolactate synthase-like protein OS=Homo sapiens GN=ILVBL PE=1 SV=1;>sp|A1L0T0|ILVBL_HUMAN Acetolactate synthase-like protein OS=Homo sapiens GN=ILVBL PE=1 SV=2;>tr|M0R1B5|M0R1B5_HUMAN Acetolactate synthase-like protein (Fragment)
Isoform 2 of Protein DEK OS	DEK	38.704	1.46001	-0.240002	-0.282737	-0.148289	-0.288981	284	62521000	22948000	19758000	26242000	10825000	6964200	16072000	5716900	6164300	20206000	6405800	6629900	2	2	1	7.3	7.3	7.3	3.8	>sp|P35659-2|DEK_HUMAN Isoform 2 of Protein DEK OS=Homo sapiens GN=DEK;>tr|B4DFG0|B4DFG0_HUMAN Protein DEK OS=Homo sapiens GN=DEK PE=1 SV=1;>sp|P35659|DEK_HUMAN Protein DEK OS=Homo sapiens GN=DEK PE=1 SV=1;>tr|D6RDA2|D6RDA2_HUMAN Protein DEK (Fragment) OS=
cDNA, FLJ95407, highly similar to Homo sapiens MCM7 minichromosome maintenance deficient 7 (S. cerevisiae) (MCM7), mRNA OS		81.279	1.38808	-0.734033	-1.02227	-0.499789	-0.680035	9	85167000	28842000	19151000	45619000	12432000	6633500	25088000	10145000	8744100	14460000	6264400	3773600	4	3	2	10.3	8.1	6.3	4.5	>tr|B2RBA6|B2RBA6_HUMAN cDNA, FLJ95407, highly similar to Homo sapiens MCM7 minichromosome maintenance deficient 7 (S. cerevisiae) (MCM7), mRNA OS=Homo sapiens PE=2 SV=1;>sp|P33993|MCM7_HUMAN DNA replication licensing factor MCM7 OS=Homo sapiens GN=MCM7 PE
cDNA FLJ34908 fis, clone NT2RI2006294, highly similar to Homo sapiens stimulated by retinoic acid gene 6 homolog (STRA6), mRNA OS		53.094	1.36952	0.138041	0.0792927	0.163112	0.171719	745	87999000	25379000	31359000	51006000	15714000	16479000	19487000	4987100	7498300	17506000	4678100	7382100	3	2	1	12.4	7.4	7.6	2.5	>tr|B3KRT6|B3KRT6_HUMAN cDNA FLJ34908 fis, clone NT2RI2006294, highly similar to Homo sapiens stimulated by retinoic acid gene 6 homolog (STRA6), mRNA OS=Homo sapiens PE=2 SV=1;>tr|B7Z5G8|B7Z5G8_HUMAN cDNA FLJ56228, highly similar to Homo sapiens stimulate
Protein arginine N-methyltransferase 1 OS	PRMT1	37.709	1.30009	-0.17376	-0.23143	-0.194014	-0.0958358	348	552770000	189430000	182820000	257580000	98792000	74299000	104490000	34075000	32133000	190690000	56559000	76390000	8	9	11	43.7	31.7	29.2	41.2	>tr|E9PKG1|E9PKG1_HUMAN Protein arginine N-methyltransferase 1 OS=Homo sapiens GN=PRMT1 PE=1 SV=1;>sp|Q99873-3|ANM1_HUMAN Isoform 3 of Protein arginine N-methyltransferase 1 OS=Homo sapiens GN=PRMT1;>sp|Q99873-2|ANM1_HUMAN Isoform 2 of Protein arginine N-m
Translocating chain-associated membrane protein 1 OS	TRAM1	33.435	1.2968	0.769252	0.412077	0.982875	0.912803	836	63963000	14669000	22445000	28118000	6732000	8947300	24612000	5327800	9209000	11233000	2608900	4288700	4	3	2	14.9	14.9	11.1	10.8	>tr|G3XAN4|G3XAN4_HUMAN Translocating chain-associated membrane protein 1 OS=Homo sapiens GN=TRAM1 PE=1 SV=1;>sp|Q15629-2|TRAM1_HUMAN Isoform 2 of Translocating chain-associated membrane protein 1 OS=Homo sapiens GN=TRAM1;>tr|Q6FHU7|Q6FHU7_HUMAN TRAM1 prot
Isoform 4 of DNA mismatch repair protein Msh6 OS	MSH6	119.79	1.28059	-0.387588	-0.520873	-0.431812	-0.210079	162	33748000	12928000	10054000	18371000	7989700	4904500	3375400	1050100	851170	12001000	3888600	4298100	3	3	3	5.2	4.1	4	3.9	>sp|P52701-4|MSH6_HUMAN Isoform 4 of DNA mismatch repair protein Msh6 OS=Homo sapiens GN=MSH6;>tr|A0A087WWJ1|A0A087WWJ1_HUMAN DNA mismatch repair protein Msh6 OS=Homo sapiens GN=MSH6 PE=4 SV=1;>tr|Q1L838|Q1L838_HUMAN GTBP-ALT OS=Homo sapiens GN=GTBP PE=3 S
ATPase type 13A1, isoform CRA	ATP13A1	121.11	1.26822	0.455401	0.289952	0.664392	0.41186	820	114610000	29386000	42507000	58123000	17348000	19360000	30914000	6257400	13126000	25575000	5780800	10022000	7	6	4	8.1	8.1	6.7	4.8	>tr|A0A024R7P3|A0A024R7P3_HUMAN ATPase type 13A1, isoform CRA_f OS=Homo sapiens GN=ATP13A1 PE=3 SV=1;>sp|Q9HD20-2|AT131_HUMAN Isoform B of Manganese-transporting ATPase 13A1 OS=Homo sapiens GN=ATP13A1;>tr|A0A024R7N2|A0A024R7N2_HUMAN ATPase type 13A1, isofo
Protein disulfide-isomerase A4 OS	PDIA4	72.932	1.26514	0.167119	0.0905825	0.228973	0.181802	759	1757100000	503070000	632250000	513020000	181770000	171710000	713860000	184350000	249660000	530210000	136950000	210890000	20	25	23	48.4	38.9	48.2	43.4	>sp|P13667|PDIA4_HUMAN Protein disulfide-isomerase A4 OS=Homo sapiens GN=PDIA4 PE=1 SV=2
Septin-7 (Fragment) OS		43.036	1.26182	-0.720423	-0.411445	-1.02034	-0.729483	13	71792000	27947000	22060000	27106000	10061000	8054200	21072000	9010600	5541800	23614000	8875100	8464400	3	3	4	15.8	12.9	10.5	15.8	>tr|H0Y3Y4|H0Y3Y4_HUMAN Septin-7 (Fragment) OS=Homo sapiens GN=SEPT7 PE=1 SV=1;>tr|Q59EY4|Q59EY4_HUMAN CDC10 protein variant (Fragment) OS=Homo sapiens PE=2 SV=1;>tr|B4DNE4|B4DNE4_HUMAN cDNA FLJ52574, highly similar to Septin-7 OS=Homo sapiens PE=2 SV=1;>t
CALU protein OS	CALU	37.106	1.25978	0.220524	0.141433	0.196481	0.323658	779	201630000	61923000	72554000	80902000	22453000	33869000	46831000	9771300	12920000	73895000	29699000	25765000	4	4	4	18.7	18.7	18.7	18.7	>tr|Q6IAW5|Q6IAW5_HUMAN CALU protein OS=Homo sapiens GN=CALU PE=2 SV=1;>tr|B3KQF5|B3KQF5_HUMAN cDNA FLJ90381 fis, clone NT2RP2005035, highly similar to Calumenin OS=Homo sapiens PE=2 SV=1;>sp|O43852|CALU_HUMAN Calumenin OS=Homo sapiens GN=CALU PE=1 SV=2;>s
ATP-dependent Clp protease proteolytic subunit OS	CLPP	20.568	1.23933	0.818269	0.432104	1.13284	0.889863	838	218390000	41898000	84751000	72858000	16902000	27345000	102410000	16736000	37339000	43118000	8260100	20068000	4	5	3	41.6	29.5	33.7	21.6	>tr|M0R208|M0R208_HUMAN ATP-dependent Clp protease proteolytic subunit OS=Homo sapiens GN=CLPP PE=1 SV=1;>sp|Q16740|CLPP_HUMAN ATP-dependent Clp protease proteolytic subunit, mitochondrial OS=Homo sapiens GN=CLPP PE=1 SV=1;>tr|M0QYV5|M0QYV5_HUMAN ATP-depen
Niemann-Pick disease, type C1 variant (Fragment) OS		143.23	1.23931	2.08138	1.31939	3.08182	1.84294	854	902250000	103660000	416570000	251100000	37635000	103010000	461240000	40190000	223110000	189920000	25833000	90453000	7	10	8	8.8	7.1	8.8	7.7	>tr|Q59GR1|Q59GR1_HUMAN Niemann-Pick disease, type C1 variant (Fragment) OS=Homo sapiens PE=4 SV=1;>sp|O15118|NPC1_HUMAN Niemann-Pick C1 protein OS=Homo sapiens GN=NPC1 PE=1 SV=2;>tr|B4DIP7|B4DIP7_HUMAN cDNA FLJ57114, highly similar to Niemann-Pick C1 prot
Coiled-coil-helix-coiled-coil-helix domain containing 4, isoform CRA	CHCHD4	15.996	1.2378	0.543863	0.283803	0.747516	0.60027	831	67114000	18582000	24023000	23498000	8775900	7383400	21453000	4502200	7858000	22163000	5303600	8781900	3	2	3	29.6	29.6	25.4	29.6	>tr|A0A024R2I5|A0A024R2I5_HUMAN Coiled-coil-helix-coiled-coil-helix domain containing 4, isoform CRA_a OS=Homo sapiens GN=CHCHD4 PE=4 SV=1;>sp|Q8N4Q1|MIA40_HUMAN Mitochondrial intermembrane space import and assembly protein 40 OS=Homo sapiens GN=CHCHD4 PE=
Tyrosine-protein phosphatase non-receptor type OS	PTPN1	49.966	1.23509	0.109216	0.129745	0.0546401	0.143263	725	115780000	35665000	41509000	55576000	18344000	17018000	31113000	9410200	12172000	29088000	7911600	12319000	6	5	4	16.8	16.8	14.3	11.7	>tr|A8K3M3|A8K3M3_HUMAN Tyrosine-protein phosphatase non-receptor type OS=Homo sapiens GN=PTPN1 PE=2 SV=1;>sp|P18031|PTN1_HUMAN Tyrosine-protein phosphatase non-receptor type 1 OS=Homo sapiens GN=PTPN1 PE=1 SV=1;>tr|B4DSN5|B4DSN5_HUMAN Tyrosine-protein pho
Annexin OS	HEL-S-270	38.576	1.21055	-0.105815	-0.159815	-0.0693459	-0.0882855	418	11570000000	3700500000	3876300000	4469300000	1740800000	1388300000	3372900000	956120000	1101600000	3727700000	1003500000	1386400000	24	24	21	67.6	67.6	62.8	54.6	>tr|V9HW65|V9HW65_HUMAN Annexin OS=Homo sapiens GN=HEL-S-270 PE=2 SV=1;>tr|A0A024R5Z7|A0A024R5Z7_HUMAN Annexin OS=Homo sapiens GN=ANXA2 PE=3 SV=1;>sp|P07355|ANXA2_HUMAN Annexin A2 OS=Homo sapiens GN=ANXA2 PE=1 SV=2;>sp|P07355-2|ANXA2_HUMAN Isoform 2 of Ann
Calnexin OS	CANX	67.567	1.2088	0.249477	0.191689	0.379399	0.177344	785	1846000000	520070000	668330000	610470000	199140000	194900000	749890000	186480000	277930000	485610000	134450000	195490000	17	19	19	35.6	32.3	35.5	34	>sp|P27824|CALX_HUMAN Calnexin OS=Homo sapiens GN=CANX PE=1 SV=2;>sp|P27824-2|CALX_HUMAN Isoform 2 of Calnexin OS=Homo sapiens GN=CANX;>sp|P27824-3|CALX_HUMAN Isoform 3 of Calnexin OS=Homo sapiens GN=CANX
28S ribosomal protein S16, mitochondrial OS	MRPS16	11.15	1.19842	-0.108606	-0.0523862	-0.12658	-0.146851	412	114580000	35526000	35265000	58777000	17414000	16215000	25423000	8072900	8104000	30381000	10039000	10946000	2	2	2	26.3	26.3	26.3	26.3	>tr|A6ND22|A6ND22_HUMAN 28S ribosomal protein S16, mitochondrial OS=Homo sapiens GN=MRPS16 PE=1 SV=1;>sp|Q9Y3D3-2|RT16_HUMAN Isoform 2 of 28S ribosomal protein S16, mitochondrial OS=Homo sapiens GN=MRPS16;>sp|Q9Y3D3|RT16_HUMAN 28S ribosomal protein S16, mi
Isoform 2 of Transmembrane emp24 domain-containing protein 7 OS	TMED7	21.233	1.19172	1.06932	0.899098	1.62574	0.683113	844	139170000	19253000	51609000	39158000	8042800	14077000	63161000	5239800	23083000	36850000	5970000	14449000	2	2	2	11.7	11.7	11.7	11.7	>sp|Q9Y3B3-2|TMED7_HUMAN Isoform 2 of Transmembrane emp24 domain-containing protein 7 OS=Homo sapiens GN=TMED7;>sp|Q9Y3B3|TMED7_HUMAN Transmembrane emp24 domain-containing protein 7 OS=Homo sapiens GN=TMED7 PE=1 SV=2;>sp|Q86XR7-2|TCAM2_HUMAN Isoform 2 of T
cDNA FLJ36188 fis, clone TESTI2027179, highly similar to Transmembrane 9 superfamily protein member 2 OS		65.43	1.18989	0.075319	0.0560286	0.0543624	0.115566	686	233410000	73478000	84237000	100050000	34312000	33350000	66628000	18430000	23735000	66725000	20736000	27152000	4	4	3	9.9	9.9	9.9	7.9	>tr|B3KSG9|B3KSG9_HUMAN cDNA FLJ36188 fis, clone TESTI2027179, highly similar to Transmembrane 9 superfamily protein member 2 OS=Homo sapiens PE=2 SV=1;>tr|A0A024QYR8|A0A024QYR8_HUMAN Dinucleotide oxidase disulfide thiol exchanger 3 superfamily member 2 OS
Signal peptidase complex subunit 2 OS	SPCS2	10.163	1.18814	0.3089	0.376402	0.405992	0.144308	798	84974000	23806000	31818000	30768000	9490200	11187000	27720000	7347200	9921900	26486000	6968400	10709000	2	2	2	32.2	32.2	32.2	32.2	>tr|E9PRB9|E9PRB9_HUMAN Signal peptidase complex subunit 2 OS=Homo sapiens GN=SPCS2 PE=1 SV=1;>tr|E9PL01|E9PL01_HUMAN Signal peptidase complex subunit 2 OS=Homo sapiens GN=SPCS2 PE=1 SV=1;>tr|B4DDB9|B4DDB9_HUMAN cDNA FLJ56339, highly similar to Signal pept
Probable ATP-dependent RNA helicase DDX46 OS	DDX46	117.36	1.17804	-0.720703	-0.979942	-0.844665	-0.337503	12	66595000	27310000	17392000	24314000	10317000	5759800	24873000	10926000	6989700	17408000	6066900	4642400	4	4	4	10.4	6.3	5.4	5.6	>sp|Q7L014|DDX46_HUMAN Probable ATP-dependent RNA helicase DDX46 OS=Homo sapiens GN=DDX46 PE=1 SV=2;>tr|A8K6X3|A8K6X3_HUMAN cDNA FLJ78679, highly similar to Homo sapiens DEAD (Asp-Glu-Ala-Asp) box polypeptide 46 (DDX46), mRNA OS=Homo sapiens PE=2 SV=1;>tr|
Voltage-dependent anion channel 2, isoform CRA	VDAC2	31.566	1.16436	1.86301	1.55026	2.86815	1.17063	851	5712000000	625370000	2474600000	1750300000	262180000	674820000	2509400000	142050000	1131400000	1452300000	221130000	668360000	5	5	5	61.9	61.9	61.9	61.9	>tr|A0A024QZT0|A0A024QZT0_HUMAN Voltage-dependent anion channel 2, isoform CRA_c OS=Homo sapiens GN=VDAC2 PE=4 SV=1;>sp|P45880|VDAC2_HUMAN Voltage-dependent anion-selective channel protein 2 OS=Homo sapiens GN=VDAC2 PE=1 SV=2;>sp|P45880-2|VDAC2_HUMAN Isofo
HNRNPL protein (Fragment) OS	HNRNPL	61.926	1.15795	-0.195215	-0.292157	-0.104186	-0.189302	320	987330000	321840000	326440000	436860000	156040000	133020000	215410000	67301000	75598000	335070000	98499000	117820000	7	7	8	39	32.9	35.5	39	>tr|Q6NTA2|Q6NTA2_HUMAN HNRNPL protein (Fragment) OS=Homo sapiens GN=HNRNPL PE=2 SV=2;>sp|P14866|HNRPL_HUMAN Heterogeneous nuclear ribonucleoprotein L OS=Homo sapiens GN=HNRNPL PE=1 SV=2;>tr|M0QXS5|M0QXS5_HUMAN Heterogeneous nuclear ribonucleoprotein L (Fr
Protein disulfide-isomerase OS	P4HB	57.116	1.14746	0.276252	0.404358	0.289126	0.135272	793	1895100000	521550000	670820000	748850000	217480000	262640000	581520000	151920000	176610000	564700000	152150000	231570000	17	17	16	39.8	36	35.8	31.7	>tr|A0A024R8S5|A0A024R8S5_HUMAN Protein disulfide-isomerase OS=Homo sapiens GN=P4HB PE=3 SV=1;>sp|P07237|PDIA1_HUMAN Protein disulfide-isomerase OS=Homo sapiens GN=P4HB PE=1 SV=3;>tr|B4DUA5|B4DUA5_HUMAN cDNA FLJ59430, highly similar to Protein disulfide-is
Translocase of outer mitochondrial membrane 40 homolog (Yeast), isoform CRA	TOMM40	37.893	1.14262	0.253139	0.277271	0.363788	0.11836	786	540520000	151800000	196670000	230750000	69237000	70960000	129350000	37307000	45570000	180420000	45260000	80144000	5	5	4	31.6	24.9	27.4	20.8	>tr|A0A024R0P9|A0A024R0P9_HUMAN Translocase of outer mitochondrial membrane 40 homolog (Yeast), isoform CRA_c OS=Homo sapiens GN=TOMM40 PE=4 SV=1;>sp|O96008|TOM40_HUMAN Mitochondrial import receptor subunit TOM40 homolog OS=Homo sapiens GN=TOMM40 PE=1 SV=1
Aldehyde dehydrogenase 1 family, member A1, isoform CRA	HEL-S-53e	54.861	1.14063	1.12784	1.42508	0.486354	1.47207	845	15065000000	2515900000	5794200000	5131700000	950760000	2361200000	5190200000	1035800000	1566800000	4743200000	529320000	1866200000	17	16	15	64.1	62.7	56.7	61.5	>tr|V9HW83|V9HW83_HUMAN Aldehyde dehydrogenase 1 family, member A1, isoform CRA_a OS=Homo sapiens GN=HEL-S-53e PE=2 SV=1;>sp|P00352|AL1A1_HUMAN Retinal dehydrogenase 1 OS=Homo sapiens GN=ALDH1A1 PE=1 SV=2;>tr|V9HVX6|V9HVX6_HUMAN Epididymis luminal protein
cDNA, FLJ93378, highly similar to Homo sapiens MCM3 minichromosome maintenance deficient 3 (S. cerevisiae) (MCM3), mRNA OS		91.008	1.12295	-0.476687	-0.357511	-0.753434	-0.319118	103	122890000	44890000	38445000	57366000	22263000	18051000	27697000	11502000	7521900	37826000	11125000	12872000	12	9	7	26.4	24.8	15.8	11.6	>tr|B2R7C5|B2R7C5_HUMAN cDNA, FLJ93378, highly similar to Homo sapiens MCM3 minichromosome maintenance deficient 3 (S. cerevisiae) (MCM3), mRNA OS=Homo sapiens PE=2 SV=1;>sp|P25205|MCM3_HUMAN DNA replication licensing factor MCM3 OS=Homo sapiens GN=MCM3 PE
Voltage-dependent anion-selective channel protein 1 OS	VDAC1	30.772	1.11209	1.84532	1.43962	2.92431	1.17204	850	11885000000	1150300000	4888300000	2690500000	418790000	993190000	6717800000	359520000	2840800000	2476900000	371970000	1054300000	15	16	16	70.7	66.4	66.8	69.6	>sp|P21796|VDAC1_HUMAN Voltage-dependent anion-selective channel protein 1 OS=Homo sapiens GN=VDAC1 PE=1 SV=2;>tr|B3KTS5|B3KTS5_HUMAN cDNA FLJ38670 fis, clone HSYRA2000190, highly similar to Voltage-dependent anion-selective channel protein 1 OS=Homo sapie
cDNA FLJ56267, highly similar to Transducin beta-like 2 protein OS		35.379	1.10889	0.533664	0.562865	0.792022	0.246104	829	161350000	39927000	62896000	63640000	17482000	24459000	44738000	9051700	17493000	52972000	13393000	20944000	5	4	5	30.5	27	19.5	23	>tr|B4DY59|B4DY59_HUMAN cDNA FLJ56267, highly similar to Transducin beta-like 2 protein OS=Homo sapiens PE=2 SV=1;>tr|E9PF19|E9PF19_HUMAN Transducin beta-like protein 2 OS=Homo sapiens GN=TBL2 PE=1 SV=1;>tr|Q8N2L6|Q8N2L6_HUMAN cDNA FLJ90138 fis, clone HEMB
Cleavage and polyadenylation-specificity factor subunit 7 (Fragment) OS	CPSF7	41.265	1.10648	-0.590321	-0.924563	-0.516677	-0.329722	47	33871000	13103000	8650100	16211000	7067300	2837300	9357400	3304700	3298600	8303000	2731000	2514200	3	3	2	13.1	10.2	11	8	>tr|F5H669|F5H669_HUMAN Cleavage and polyadenylation-specificity factor subunit 7 (Fragment) OS=Homo sapiens GN=CPSF7 PE=1 SV=1;>tr|B4DGF8|B4DGF8_HUMAN cDNA FLJ57877, highly similar to Cleavage and polyadenylation specificity factor 7 OS=Homo sapiens PE=2
Epididymis secretory protein Li 85 OS	PCBP1	37.497	1.1051	-0.281798	-0.444086	-0.23817	-0.163139	249	109280000	37558000	35247000	37005000	15412000	10006000	36578000	12735000	12089000	35697000	9410600	13153000	3	4	5	37.4	25	30.9	37.4	>tr|Q53SS8|Q53SS8_HUMAN Epididymis secretory protein Li 85 OS=Homo sapiens GN=PCBP1 PE=2 SV=1;>sp|Q15365|PCBP1_HUMAN Poly(rC)-binding protein 1 OS=Homo sapiens GN=PCBP1 PE=1 SV=2
Isoform B of AP-2 complex subunit alpha-1 OS	AP2A1	105.36	1.05526	-0.228321	-0.37357	-0.153158	-0.158236	296	68507000	23253000	22068000	31096000	11626000	9120800	8884800	3089500	2998500	28526000	8538000	9948800	6	4	5	15	11.8	8.8	12.1	>sp|O95782-2|AP2A1_HUMAN Isoform B of AP-2 complex subunit alpha-1 OS=Homo sapiens GN=AP2A1;>sp|O95782|AP2A1_HUMAN AP-2 complex subunit alpha-1 OS=Homo sapiens GN=AP2A1 PE=1 SV=3;>tr|Q8N9K4|Q8N9K4_HUMAN cDNA FLJ36998 fis, clone BRACE2007295, highly similar
EIF3A protein (Fragment) OS	EIF3A	96.863	1.04941	-0.706436	-0.26401	-1.01185	-0.843448	18	25295000	11314000	7206200	9074500	3208200	3010000	6863600	4188300	1271100	9356700	3917700	2925200	3	3	2	6.2	4.8	4.7	3.6	>tr|Q7Z5T5|Q7Z5T5_HUMAN EIF3A protein (Fragment) OS=Homo sapiens GN=EIF3A PE=2 SV=1;>sp|Q14152-2|EIF3A_HUMAN Isoform 2 of Eukaryotic translation initiation factor 3 subunit A OS=Homo sapiens GN=EIF3A;>tr|Q24JU4|Q24JU4_HUMAN Eukaryotic translation initiatio
Glutathione S-transferase kappa 1 OS	LOC51064	25.497	1.04725	-0.0719287	-0.110604	-0.0306193	-0.0745625	468	435320000	143530000	151940000	189400000	71151000	63778000	110620000	30510000	37343000	135290000	41871000	50818000	8	7	6	40.3	40.3	35	33.2	>tr|Q6FII1|Q6FII1_HUMAN Glutathione S-transferase kappa 1 OS=Homo sapiens GN=LOC51064 PE=2 SV=1;>sp|Q9Y2Q3|GSTK1_HUMAN Glutathione S-transferase kappa 1 OS=Homo sapiens GN=GSTK1 PE=1 SV=3;>tr|Q2NLC8|Q2NLC8_HUMAN GSTK1 protein (Fragment) OS=Homo sapiens GN=
CAAX prenyl protease 1 homolog OS	ZMPSTE24	54.812	1.03824	0.254888	0.402176	0.115166	0.24732	788	391540000	111030000	147670000	191860000	54823000	70238000	81847000	20432000	27357000	117830000	35774000	50077000	6	5	5	14.3	14.3	10.1	10.1	>sp|O75844|FACE1_HUMAN CAAX prenyl protease 1 homolog OS=Homo sapiens GN=ZMPSTE24 PE=1 SV=2;>tr|B3KNM6|B3KNM6_HUMAN cDNA FLJ14968 fis, clone THYRO1000288, highly similar to CAAX prenyl protease 1 homolog (EC 3.4.24.84) OS=Homo sapiens PE=2 SV=1
Poly(A) binding protein, cytoplasmic 1, isoform CRA	PABPC1	47.334	1.01476	-0.867035	-0.835394	-0.379395	-1.38632	4	136320000	60939000	38364000	41399000	17717000	11162000	43082000	18042000	14375000	51837000	25181000	12827000	6	7	7	20.8	16.7	18.6	18.1	>tr|A0A024R9E2|A0A024R9E2_HUMAN Poly(A) binding protein, cytoplasmic 1, isoform CRA_c OS=Homo sapiens GN=PABPC1 PE=4 SV=1;>tr|A0A087WTT1|A0A087WTT1_HUMAN Polyadenylate-binding protein 1 OS=Homo sapiens GN=PABPC1 PE=4 SV=1;>sp|P11940-2|PABP1_HUMAN Isoform 2
Mitochondrial-processing peptidase subunit alpha OS	PMPCA	58.252	1.00526	0.147577	0.207018	0.0478175	0.187894	751	49996000	14144000	18211000	21108000	6371200	7086400	7864500	2389900	2656500	21023000	5383400	8468300	3	2	2	13	11	5.9	4.2	>sp|Q10713|MPPA_HUMAN Mitochondrial-processing peptidase subunit alpha OS=Homo sapiens GN=PMPCA PE=1 SV=2;>tr|B4DRK5|B4DRK5_HUMAN cDNA FLJ59584, highly similar to Mitochondrial-processing peptidase alpha subunit, mitochondrial (EC 3.4.24.64) OS=Homo sapien
AFG3 ATPase family gene 3-like 2 (Yeast), isoform CRA	AFG3L2	84.444	1.00482	0.14043	0.16633	0.207143	0.0478175	747	125930000	49733000	37101000	64604000	21138000	19306000	39275000	21635000	9155400	22053000	6959900	8639500	9	7	7	19.2	16.7	13.3	13.6	>tr|D3DUJ0|D3DUJ0_HUMAN AFG3 ATPase family gene 3-like 2 (Yeast), isoform CRA_a (Fragment) OS=Homo sapiens GN=AFG3L2 PE=3 SV=1;>sp|Q9Y4W6|AFG32_HUMAN AFG3-like protein 2 OS=Homo sapiens GN=AFG3L2 PE=1 SV=2;>tr|Q8TA92|Q8TA92_HUMAN Similar to AFG3 ATPase fam
Isoform 5 of Sarcoplasmic/endoplasmic reticulum calcium ATPase 2 OS	ATP2A2	109.73	1.00208	0.827248	0.457437	1.38211	0.642193	840	2548200000	609470000	1167000000	1031500000	317940000	393150000	808150000	134510000	441330000	708520000	157020000	332500000	21	25	23	33.1	26.4	33.1	30.3	>sp|P16615-5|AT2A2_HUMAN Isoform 5 of Sarcoplasmic/endoplasmic reticulum calcium ATPase 2 OS=Homo sapiens GN=ATP2A2;>sp|P16615-2|AT2A2_HUMAN Isoform 2 of Sarcoplasmic/endoplasmic reticulum calcium ATPase 2 OS=Homo sapiens GN=ATP2A2;>sp|P16615-3|AT2A2_HUMAN
Isoform 2 of Clathrin heavy chain 1 OS	CLTC	187.89	1.00054	-0.559471	-0.440557	-0.303703	-0.934152	61	1007900000	407280000	312410000	514630000	201750000	139130000	229920000	94973000	87632000	263300000	110550000	85646000	26	25	21	25.8	23.7	21	16.3	>sp|Q00610-2|CLH1_HUMAN Isoform 2 of Clathrin heavy chain 1 OS=Homo sapiens GN=CLTC;>sp|Q00610|CLH1_HUMAN Clathrin heavy chain 1 OS=Homo sapiens GN=CLTC PE=1 SV=5;>tr|A0A087WVQ6|A0A087WVQ6_HUMAN Clathrin heavy chain 1 OS=Homo sapiens GN=CLTC PE=4 SV=1
Vesicle transport-related protein isoform a variant (Fragment) OS		72.307	0.993614	-0.406289	-0.214408	-0.324816	-0.679642	155	83866000	29377000	26756000	37902000	14391000	11547000	18432000	6073300	5776300	27532000	8913200	9432700	7	3	8	22.4	18.7	7.8	19.8	>tr|Q53GW1|Q53GW1_HUMAN Vesicle transport-related protein isoform a variant (Fragment) OS=Homo sapiens PE=2 SV=1;>sp|Q8WVM8|SCFD1_HUMAN Sec1 family domain-containing protein 1 OS=Homo sapiens GN=SCFD1 PE=1 SV=4;>tr|B7Z5N7|B7Z5N7_HUMAN cDNA FLJ58612, highly
cDNA FLJ61181, highly similar to Homo sapiens hydroxysteroid (17-beta) dehydrogenase 12 (HSD17B12), mRNA OS		33.528	0.990681	0.219234	0.273098	0.31545	0.0691523	778	243420000	66185000	91842000	73888000	23088000	26878000	59926000	13570000	19423000	109610000	29527000	45540000	3	3	3	17.1	13.5	12.5	12.2	>tr|B4DWS6|B4DWS6_HUMAN cDNA FLJ61181, highly similar to Homo sapiens hydroxysteroid (17-beta) dehydrogenase 12 (HSD17B12), mRNA OS=Homo sapiens PE=2 SV=1;>sp|Q53GQ0|DHB12_HUMAN Estradiol 17-beta-dehydrogenase 12 OS=Homo sapiens GN=HSD17B12 PE=1 SV=2;>tr|D
Isoform 4 of Scavenger receptor class B member 1 OS	SCARB1	53.579	0.98688	1.75101	0.873577	2.92477	1.4547	849	150600000	18198000	78435000	24751000	9297700	8181400	65748000	4146100	29754000	60102000	4753900	40500000	2	3	3	10.1	5.9	7.6	8.4	>sp|Q8WTV0-4|SCRB1_HUMAN Isoform 4 of Scavenger receptor class B member 1 OS=Homo sapiens GN=SCARB1;>tr|B7ZKQ9|B7ZKQ9_HUMAN SCARB1 protein OS=Homo sapiens GN=SCARB1 PE=1 SV=1;>tr|A0A024RBS4|A0A024RBS4_HUMAN Scavenger receptor class B, member 1, isoform CRA
Epididymis secretory protein Li 55 OS	HEL-S-55	17.031	0.977701	-0.193222	-0.220782	-0.295128	-0.0637559	323	520210000	170740000	179200000	252990000	93948000	81014000	122050000	36830000	41234000	145160000	39965000	56952000	9	8	8	74.1	74.1	65.4	59.9	>tr|V9HW35|V9HW35_HUMAN Epididymis secretory protein Li 55 OS=Homo sapiens GN=HEL-S-55 PE=2 SV=1;>sp|P30044-2|PRDX5_HUMAN Isoform Cytoplasmic+peroxisomal of Peroxiredoxin-5, mitochondrial OS=Homo sapiens GN=PRDX5;>sp|P30044|PRDX5_HUMAN Peroxiredoxin-5, mit
Epididymis secretory protein Li 103 OS	HEL-S-103	70.051	0.96796	-0.300931	-0.239174	-0.510395	-0.153222	230	459320000	155300000	148300000	171490000	60650000	52852000	130070000	50044000	35993000	157750000	44603000	59459000	6	6	5	36.8	33.2	36.8	28.4	>tr|A8K5I0|A8K5I0_HUMAN Epididymis secretory protein Li 103 OS=Homo sapiens GN=HEL-S-103 PE=2 SV=1;>sp|P08107|HSP71_HUMAN Heat shock 70 kDa protein 1A/1B OS=Homo sapiens GN=HSPA1A PE=1 SV=5;>tr|Q59EJ3|Q59EJ3_HUMAN Heat shock 70kDa protein 1A variant (Fragm
Splicing factor U2AF 65 kDa subunit OS	U2AF2	33.901	0.95759	-0.459007	-0.791982	-0.287554	-0.297484	119	131530000	51959000	36332000	47008000	20929000	10789000	29704000	10284000	10468000	54819000	20746000	15074000	4	4	3	25.1	25.1	25.1	17.9	>tr|K7ENG2|K7ENG2_HUMAN Splicing factor U2AF 65 kDa subunit OS=Homo sapiens GN=U2AF2 PE=1 SV=1;>tr|B5BU25|B5BU25_HUMAN U2 small nuclear RNA auxiliary factor 2 isoform b OS=Homo sapiens GN=U2AF2 PE=2 SV=1;>sp|P26368-2|U2AF2_HUMAN Isoform 2 of Splicing facto
Holocytochrome c synthase (Cytochrome c heme-lyase), isoform CRA	HCCS	30.601	0.949602	0.603609	0.368265	1.04607	0.396488	832	76543000	15050000	28669000	22879000	5356800	7438200	33472000	5625300	13293000	20193000	4067500	7937500	2	4	2	16.8	10.4	16.8	10.4	>tr|A0A024RBY9|A0A024RBY9_HUMAN Holocytochrome c synthase (Cytochrome c heme-lyase), isoform CRA_a OS=Homo sapiens GN=HCCS PE=4 SV=1;>sp|P53701|CCHL_HUMAN Cytochrome c-type heme lyase OS=Homo sapiens GN=HCCS PE=1 SV=1;>tr|Q68D50|Q68D50_HUMAN Putative uncha
Isoform 2 of NADH dehydrogenase [ubiquinone] 1 beta subcomplex subunit 5, mitochondrial OS	NDUFB5	15.667	0.949471	-0.0657804	-0.0775585	-0.0193604	-0.100422	477	64093000	22349000	18543000	26138000	11683000	6754600	15284000	4732000	5006400	22671000	5934400	6782200	2	2	2	17.5	17.5	17.5	17.5	>sp|O43674-2|NDUB5_HUMAN Isoform 2 of NADH dehydrogenase [ubiquinone] 1 beta subcomplex subunit 5, mitochondrial OS=Homo sapiens GN=NDUFB5;>tr|E7EWP0|E7EWP0_HUMAN NADH dehydrogenase [ubiquinone] 1 beta subcomplex subunit 5, mitochondrial OS=Homo sapiens GN
All-trans-retinol 13,14-reductase OS	RETSAT	66.819	0.945716	0.406891	0.511468	0.598175	0.111031	812	22619000	6709400	8699900	9391500	3305200	3287400	6388000	1346200	2529400	6839800	2058000	2883100	2	2	2	4.9	4.9	4.9	4.9	>sp|Q6NUM9|RETST_HUMAN All-trans-retinol 13,14-reductase OS=Homo sapiens GN=RETSAT PE=1 SV=2;>tr|I0EZ74|I0EZ74_HUMAN Retinol saturase (Fragment) OS=Homo sapiens GN=RETSAT PE=4 SV=1;>tr|H7C3J0|H7C3J0_HUMAN All-trans-retinol 13,14-reductase (Fragment) OS=Hom
60S ribosomal protein L17 (Fragment) OS	RPL17	19.586	0.922444	-0.528297	-0.276048	-0.925878	-0.382965	76	203860000	73976000	65533000	87192000	31389000	26980000	58447000	24092000	18753000	58220000	18495000	19800000	4	4	2	25.4	24.3	16	14.2	>tr|A0A087WXM6|A0A087WXM6_HUMAN 60S ribosomal protein L17 (Fragment) OS=Homo sapiens GN=RPL17 PE=4 SV=1;>tr|J3QQT2|J3QQT2_HUMAN 60S ribosomal protein L17 (Fragment) OS=Homo sapiens GN=RPL17 PE=1 SV=1;>tr|J3KRX5|J3KRX5_HUMAN 60S ribosomal protein L17 (Fragm
Isoform Cytoplasmic of Glutathione reductase, mitochondrial OS	GSR	51.7	0.919739	-0.416922	-0.447328	-0.67648	-0.126959	146	1150600000	418320000	355070000	412830000	174920000	116320000	341210000	127840000	97715000	396560000	115560000	141040000	10	11	11	38.4	30.1	32.4	33.6	>sp|P00390-2|GSHR_HUMAN Isoform Cytoplasmic of Glutathione reductase, mitochondrial OS=Homo sapiens GN=GSR;>tr|V9HW90|V9HW90_HUMAN Epididymis luminal protein 75 OS=Homo sapiens GN=HEL-75 PE=2 SV=1;>sp|P00390|GSHR_HUMAN Glutathione reductase, mitochondrial
Epididymis tissue sperm binding protein Li 14m OS		82.999	0.916553	0.352745	0.192573	0.621993	0.243669	806	2925300000	803130000	1081000000	1020800000	358760000	352700000	926200000	174700000	360160000	978310000	269670000	368080000	24	25	26	49.3	43.1	44.3	47.6	>tr|E9KL44|E9KL44_HUMAN Epididymis tissue sperm binding protein Li 14m OS=Homo sapiens PE=2 SV=1;>sp|P40939|ECHA_HUMAN Trifunctional enzyme subunit alpha, mitochondrial OS=Homo sapiens GN=HADHA PE=1 SV=2;>tr|B4DRH6|B4DRH6_HUMAN cDNA FLJ54509, highly simila
60S ribosomal protein L6 OS	RPL6	32.741	0.914372	-0.697345	-0.267357	-1.19106	-0.633613	21	368510000	148110000	105890000	156580000	54380000	50013000	108810000	52215000	25233000	103120000	41518000	30645000	6	8	6	30.9	19.8	27.8	20.5	>tr|Q8TBK5|Q8TBK5_HUMAN 60S ribosomal protein L6 OS=Homo sapiens GN=RPL6 PE=2 SV=1;>tr|Q8N5Z7|Q8N5Z7_HUMAN 60S ribosomal protein L6 OS=Homo sapiens GN=RPL6 PE=2 SV=1;>tr|A0A024RBK3|A0A024RBK3_HUMAN 60S ribosomal protein L6 OS=Homo sapiens GN=RPL6 PE=3 SV=1
Probable ATP-dependent RNA helicase DDX56 OS	DDX56	20.342	0.913287	-1.00732	-0.862444	-1.74087	-0.418639	1	54417000	34179000	10706000	15139000	6793100	3633400	29607000	23869000	3965500	9671900	3516900	3107100	2	2	2	21.1	16.2	12.4	16.2	>tr|F8WDT8|F8WDT8_HUMAN Probable ATP-dependent RNA helicase DDX56 OS=Homo sapiens GN=DDX56 PE=1 SV=1;>tr|G3V0G3|G3V0G3_HUMAN DEAD (Asp-Glu-Ala-Asp) box polypeptide 56, isoform CRA_a OS=Homo sapiens GN=DDX56 PE=1 SV=1;>sp|Q9NY93-2|DDX56_HUMAN Isoform 2 of P
Heat shock 70kDa protein 2, isoform CRA	HSPA2	70.02	0.910063	-0.236548	-0.12268	-0.417868	-0.169096	287	92000000	30001000	31825000	32835000	11728000	12028000	30274000	9319100	10043000	28891000	8954000	9755100	4	5	5	21.1	19.2	21.1	21.1	>tr|A0A024R6B5|A0A024R6B5_HUMAN Heat shock 70kDa protein 2, isoform CRA_a OS=Homo sapiens GN=HSPA2 PE=3 SV=1;>sp|P54652|HSP72_HUMAN Heat shock-related 70 kDa protein 2 OS=Homo sapiens GN=HSPA2 PE=1 SV=1;>tr|B3KUS2|B3KUS2_HUMAN cDNA FLJ40505 fis, clone TEST
cDNA FLJ77763, highly similar to Homo sapiens prolactin regulatory element binding (PREB), mRNA OS		45.482	0.885581	0.18298	0.324811	0.144699	0.0794293	766	30685000	9704400	11804000	13414000	4925300	4931700	7500300	2431300	2569600	9770600	2347800	4302700	2	2	2	12.9	6.5	10.8	10.8	>tr|A8K813|A8K813_HUMAN cDNA FLJ77763, highly similar to Homo sapiens prolactin regulatory element binding (PREB), mRNA OS=Homo sapiens PE=2 SV=1;>sp|Q9HCU5|PREB_HUMAN Prolactin regulatory element-binding protein OS=Homo sapiens GN=PREB PE=1 SV=2;>tr|Q05DB
Calreticulin variant (Fragment) OS		46.918	0.884622	-0.0495123	-0.0822093	-0.0527603	-0.0135672	505	479860000	153380000	167070000	186290000	69934000	60261000	146360000	45502000	48011000	147210000	37947000	58794000	9	8	7	36.9	33.7	26.6	20.2	>tr|Q53G71|Q53G71_HUMAN Calreticulin variant (Fragment) OS=Homo sapiens PE=2 SV=1;>tr|V9HW88|V9HW88_HUMAN Calreticulin, isoform CRA_b OS=Homo sapiens GN=HEL-S-99n PE=2 SV=1;>sp|P27797|CALR_HUMAN Calreticulin OS=Homo sapiens GN=CALR PE=1 SV=1;>tr|B4DHR1|B4D
NF110b OS		95.777	0.8846	-0.175817	-0.222919	-0.0369846	-0.267548	342	729340000	249440000	240190000	298370000	114910000	82585000	191970000	64455000	68183000	239000000	70084000	89425000	17	17	19	33.1	28.6	28.4	32.1	>tr|F4ZW66|F4ZW66_HUMAN NF110b OS=Homo sapiens PE=2 SV=1;>sp|Q12906-7|ILF3_HUMAN Isoform 7 of Interleukin enhancer-binding factor 3 OS=Homo sapiens GN=ILF3;>sp|Q12906-4|ILF3_HUMAN Isoform 4 of Interleukin enhancer-binding factor 3 OS=Homo sapiens GN=ILF3;>
Acetyl-Coenzyme A carboxylase alpha OS	ACACA	265.55	0.8827	-0.71421	-0.412501	-1.28912	-0.441007	15	637210000	273530000	169290000	363380000	188010000	95895000	38768000	18542000	10170000	235060000	66972000	63226000	26	10	27	17.9	15.6	5.9	15.6	>tr|B2ZZ90|B2ZZ90_HUMAN Acetyl-Coenzyme A carboxylase alpha OS=Homo sapiens GN=ACACA PE=2 SV=1;>sp|Q13085|ACACA_HUMAN Acetyl-CoA carboxylase 1 OS=Homo sapiens GN=ACACA PE=1 SV=2;>sp|Q13085-4|ACACA_HUMAN Isoform 4 of Acetyl-CoA carboxylase 1 OS=Homo sapiens
ATP-binding cassette sub-family D member 3 OS	ABCD3	75.475	0.871181	-0.202911	-0.0475323	-0.331445	-0.229755	315	259280000	90437000	91608000	123360000	46136000	43483000	51853000	17701000	18566000	84063000	26600000	29559000	8	8	8	16.8	15.6	15	15.6	>sp|P28288|ABCD3_HUMAN ATP-binding cassette sub-family D member 3 OS=Homo sapiens GN=ABCD3 PE=1 SV=1;>tr|B4DL07|B4DL07_HUMAN cDNA FLJ53353, highly similar to ATP-binding cassette sub-family D member 3 OS=Homo sapiens PE=2 SV=1;>sp|P28288-2|ABCD3_HUMAN Isof
cDNA, FLJ94025, highly similar to Homo sapiens tripartite motif-containing 28 (TRIM28), mRNA OS		88.559	0.870507	-0.445161	-0.806367	-0.220597	-0.308519	130	62206000	22968000	18282000	14087000	6798000	3402900	33796000	13012000	11350000	14323000	3158400	3528700	2	8	5	22.3	3.4	21.2	12.9	>tr|B2R8R5|B2R8R5_HUMAN cDNA, FLJ94025, highly similar to Homo sapiens tripartite motif-containing 28 (TRIM28), mRNA OS=Homo sapiens PE=2 SV=1;>sp|Q13263|TIF1B_HUMAN Transcription intermediary factor 1-beta OS=Homo sapiens GN=TRIM28 PE=1 SV=5;>sp|Q13263-2|
Isoform 2 of 3-oxoacyl-[acyl-carrier-protein] synthase, mitochondrial OS	OXSM	40.034	0.868952	-0.114226	-0.0406898	-0.201427	-0.100561	408	62150000	21075000	20848000	24280000	8321300	7797700	17377000	5633900	5394400	20493000	7119700	7656300	4	4	4	19.1	19.1	19.1	19.1	>sp|Q9NWU1-2|OXSM_HUMAN Isoform 2 of 3-oxoacyl-[acyl-carrier-protein] synthase, mitochondrial OS=Homo sapiens GN=OXSM;>tr|A0A024R2Q9|A0A024R2Q9_HUMAN 3-oxoacyl-[acyl-carrier-protein] synthase, mitochondrial OS=Homo sapiens GN=OXSM PE=3 SV=1;>sp|Q9NWU1|OXSM
Isoform 2 of Spermatid perinuclear RNA-binding protein OS	STRBP	71.966	0.868789	-0.256233	-0.274634	-0.0654608	-0.428605	272	13171000	4774500	4347800	7030900	2859400	2031700	2577800	834370	1086500	3561900	1080800	1229700	1	2	2	7.6	6.1	7.6	6.2	>sp|Q96SI9-2|STRBP_HUMAN Isoform 2 of Spermatid perinuclear RNA-binding protein OS=Homo sapiens GN=STRBP;>tr|V9HWK4|V9HWK4_HUMAN Epididymis luminal protein 162 OS=Homo sapiens GN=HEL162 PE=2 SV=1;>sp|Q96SI9|STRBP_HUMAN Spermatid perinuclear RNA-binding pro
Isoform 3 of Protein disulfide-isomerase A6 OS	PDIA6	47.837	0.867827	0.208182	0.375067	0.0915306	0.157949	771	907700000	255800000	340450000	287330000	89999000	102980000	254770000	66700000	87201000	365600000	99105000	150270000	6	8	7	27	17.6	27	23.1	>sp|Q15084-3|PDIA6_HUMAN Isoform 3 of Protein disulfide-isomerase A6 OS=Homo sapiens GN=PDIA6;>sp|Q15084|PDIA6_HUMAN Protein disulfide-isomerase A6 OS=Homo sapiens GN=PDIA6 PE=1 SV=1;>sp|Q15084-4|PDIA6_HUMAN Isoform 4 of Protein disulfide-isomerase A6 OS=H
RPL14 protein OS	RPL14	23.787	0.859214	-0.685258	-0.154506	-1.13214	-0.769133	25	73245000	29962000	21650000	26774000	9194000	7839300	22304000	11380000	5831900	24167000	9387800	7978400	3	4	3	23.2	18.6	23.2	18.6	>tr|Q6IPH7|Q6IPH7_HUMAN RPL14 protein OS=Homo sapiens GN=RPL14 PE=2 SV=1;>tr|E7EPB3|E7EPB3_HUMAN 60S ribosomal protein L14 OS=Homo sapiens GN=RPL14 PE=1 SV=1;>tr|A0PJ62|A0PJ62_HUMAN RPL14 protein (Fragment) OS=Homo sapiens GN=RPL14 PE=2 SV=1;>tr|B7Z6S8|B7Z
39S ribosomal protein L4, mitochondrial (Fragment) OS	MRPL4	33.792	0.843906	-0.0899281	-0.0999583	-0.150641	-0.019185	436	71970000	23906000	25790000	33547000	12564000	11437000	21310000	6415200	7679700	17114000	4926600	6673000	5	3	3	28	25.7	14.3	17.7	>tr|K7ES61|K7ES61_HUMAN 39S ribosomal protein L4, mitochondrial (Fragment) OS=Homo sapiens GN=MRPL4 PE=1 SV=1;>tr|A0A024R7C5|A0A024R7C5_HUMAN Mitochondrial ribosomal protein L4, isoform CRA_a OS=Homo sapiens GN=MRPL4 PE=4 SV=1;>sp|Q9BYD3|RM04_HUMAN 39S rib
Acyl-CoA synthetase 4 OS	FACL4	74.421	0.841782	-0.242201	-0.386695	-0.0418032	-0.298105	281	133330000	45048000	46816000	51262000	20607000	17769000	44940000	13644000	16092000	37129000	10797000	12955000	5	5	5	18.7	13.6	17.3	13.6	>tr|Q8TAF6|Q8TAF6_HUMAN Acyl-CoA synthetase 4 OS=Homo sapiens GN=FACL4 PE=2 SV=1;>sp|O60488-2|ACSL4_HUMAN Isoform Short of Long-chain-fatty-acid--CoA ligase 4 OS=Homo sapiens GN=ACSL4;>sp|O60488|ACSL4_HUMAN Long-chain-fatty-acid--CoA ligase 4 OS=Homo sapie
40S ribosomal protein S2 (Fragment) OS	RPS2	21.154	0.829719	-0.720075	-0.253601	-1.31455	-0.592071	14	309060000	113450000	89481000	124800000	44429000	38050000	83161000	37020000	19037000	101100000	32001000	32394000	4	5	4	30.3	22.6	30.3	22.6	>tr|H0YEN5|H0YEN5_HUMAN 40S ribosomal protein S2 (Fragment) OS=Homo sapiens GN=RPS2 PE=1 SV=1;>tr|Q8J014|Q8J014_HUMAN Ribosomal protein S2 OS=Homo sapiens GN=rps2 PE=2 SV=1;>tr|Q3KQT6|Q3KQT6_HUMAN Ribosomal protein S2 OS=Homo sapiens GN=RPS2 PE=2 SV=1;>sp|
Nuclear cap binding protein subunit 1, 80kDa, isoform CRA	NCBP1	91.838	0.828776	-0.229378	-0.385808	-0.258546	-0.0437798	295	89410000	33816000	27545000	37135000	14777000	9972300	28381000	13015000	7610300	23894000	6024900	9962600	3	3	3	8	6.7	6.6	6.7	>tr|A0A024R179|A0A024R179_HUMAN Nuclear cap binding protein subunit 1, 80kDa, isoform CRA_a OS=Homo sapiens GN=NCBP1 PE=4 SV=1;>sp|Q09161|NCBP1_HUMAN Nuclear cap-binding protein subunit 1 OS=Homo sapiens GN=NCBP1 PE=1 SV=1
RNA-binding protein 39 OS	RBM39	48.023	0.825434	-0.497868	-0.893009	-0.458624	-0.141971	95	152350000	56284000	43678000	71398000	28882000	14141000	43269000	16600000	13237000	37684000	10802000	16300000	6	7	5	25.3	22	25.3	18.2	>tr|G3XAC6|G3XAC6_HUMAN RNA-binding protein 39 OS=Homo sapiens GN=RBM39 PE=1 SV=1;>sp|Q14498-2|RBM39_HUMAN Isoform 2 of RNA-binding protein 39 OS=Homo sapiens GN=RBM39;>sp|Q14498|RBM39_HUMAN RNA-binding protein 39 OS=Homo sapiens GN=RBM39 PE=1 SV=2;>tr|B4D
NOP56 protein (Fragment) OS	NOP56	49.756	0.824458	-0.098455	-0.0242818	-0.0974711	-0.173612	427	119900000	38607000	39839000	54678000	16821000	18036000	27371000	9910600	7231100	37854000	11875000	14571000	6	5	6	19	14.3	14.3	16.8	>tr|A0PJ92|A0PJ92_HUMAN NOP56 protein (Fragment) OS=Homo sapiens GN=NOP56 PE=2 SV=1;>tr|A8K9K6|A8K9K6_HUMAN cDNA FLJ76962, highly similar to Homo sapiens nucleolar protein 5A (56kDa with KKE/D repeat) (NOL5A), mRNA OS=Homo sapiens PE=2 SV=1;>sp|O00567|NOP5
ADP-ribosylation factor 4 OS	ARF4	20.511	0.82381	-0.16164	-0.0217311	-0.2122	-0.250989	361	115010000	44304000	40614000	36704000	13966000	14662000	49086000	20889000	14735000	29223000	9449200	11217000	2	2	2	27.2	21.1	27.2	27.2	>sp|P18085|ARF4_HUMAN ADP-ribosylation factor 4 OS=Homo sapiens GN=ARF4 PE=1 SV=3;>tr|C9JPM4|C9JPM4_HUMAN ADP-ribosylation factor 4 (Fragment) OS=Homo sapiens GN=ARF4 PE=1 SV=1;>tr|C9JAK5|C9JAK5_HUMAN ADP-ribosylation factor 4 OS=Homo sapiens GN=ARF4 PE=1
Isoform 3 of AP-2 complex subunit beta OS	AP2B1	98.117	0.823792	-0.304841	-0.453972	-0.0382433	-0.422308	228	315070000	111990000	103990000	156500000	62771000	43323000	56302000	17075000	18781000	102260000	32142000	41887000	10	6	8	25.6	25.6	13.2	19	>sp|P63010-3|AP2B1_HUMAN Isoform 3 of AP-2 complex subunit beta OS=Homo sapiens GN=AP2B1;>tr|A0A087X253|A0A087X253_HUMAN AP-2 complex subunit beta OS=Homo sapiens GN=AP2B1 PE=4 SV=1;>tr|H0UID4|H0UID4_HUMAN Adaptor-related protein complex 2, beta 1 subunit,
Proliferating cell nuclear antigen OS	PCNA	28.715	0.820838	-0.414761	-0.507296	-0.674406	-0.0625803	148	419320000	151700000	125170000	153060000	69644000	48244000	129750000	44265000	34099000	136510000	37794000	42829000	7	6	7	44.8	39.1	28	36	>tr|Q6FI35|Q6FI35_HUMAN Proliferating cell nuclear antigen OS=Homo sapiens GN=PCNA PE=1 SV=1;>tr|Q6FHF5|Q6FHF5_HUMAN Proliferating cell nuclear antigen (Fragment) OS=Homo sapiens GN=PCNA PE=2 SV=1;>sp|P12004|PCNA_HUMAN Proliferating cell nuclear antigen OS
Talin-1 OS	TLN1	269.76	0.817258	-0.796676	-0.657673	-1.46482	-0.267531	6	34836000	15669000	8730300	11196000	4507900	3325600	15940000	8808200	3413400	7699200	2353200	1991300	5	9	4	7.4	3	6.3	3.1	>sp|Q9Y490|TLN1_HUMAN Talin-1 OS=Homo sapiens GN=TLN1 PE=1 SV=3
Protein BLOC1S5-TXNDC5 OS	TXNDC5	40.369	0.816582	0.137958	0.251204	0.121148	0.0415233	744	603130000	264670000	175340000	170550000	53834000	60158000	280270000	163260000	51788000	152310000	47573000	63390000	9	10	11	40	31.1	33.6	40	>tr|Q86UY0|Q86UY0_HUMAN Protein BLOC1S5-TXNDC5 OS=Homo sapiens GN=TXNDC5 PE=2 SV=1;>tr|Q6EHZ3|Q6EHZ3_HUMAN Putative uncharacterized protein STRF8 OS=Homo sapiens GN=STRF8 PE=2 SV=1;>tr|Q658S9|Q658S9_HUMAN Putative uncharacterized protein DKFZp666I134 (Frag
Isoform 2 of 26S protease regulatory subunit 8 OS	PSMC5	44.784	0.815775	-0.733056	-0.469929	-1.37954	-0.349695	10	77665000	30366000	22714000	39819000	16050000	10876000	13585000	6753900	2828600	24261000	7562500	9009400	4	3	3	19.3	12.8	10.8	10.6	>sp|P62195-2|PRS8_HUMAN Isoform 2 of 26S protease regulatory subunit 8 OS=Homo sapiens GN=PSMC5;>sp|P62195|PRS8_HUMAN 26S protease regulatory subunit 8 OS=Homo sapiens GN=PSMC5 PE=1 SV=1;>tr|Q59GS3|Q59GS3_HUMAN Proteasome 26S ATPase subunit 5 variant (Frag
39S ribosomal protein L37, mitochondrial OS	MRPL37	48.117	0.80632	-0.10077	-0.186836	-0.0823468	-0.0331266	422	146050000	46712000	51663000	54652000	21082000	16774000	38083000	11055000	13531000	53317000	14575000	21357000	7	6	7	28.8	20.6	20.6	21	>sp|Q9BZE1|RM37_HUMAN 39S ribosomal protein L37, mitochondrial OS=Homo sapiens GN=MRPL37 PE=1 SV=2;>tr|S4R369|S4R369_HUMAN 39S ribosomal protein L37, mitochondrial OS=Homo sapiens GN=MRPL37 PE=1 SV=1
Isoform 4 of Poly(U)-binding-splicing factor PUF60 OS	PUF60	54.024	0.804308	-0.475071	-0.831281	-0.0905878	-0.503343	105	1098000000	46640000	469900000	584380000	18969000	9123000	54235000	18340000	20244000	459370000	9330600	440540000	5	6	6	29.3	16.2	22.4	19.8	>sp|Q9UHX1-4|PUF60_HUMAN Isoform 4 of Poly(U)-binding-splicing factor PUF60 OS=Homo sapiens GN=PUF60;>sp|Q9UHX1-6|PUF60_HUMAN Isoform 6 of Poly(U)-binding-splicing factor PUF60 OS=Homo sapiens GN=PUF60;>sp|Q9UHX1-3|PUF60_HUMAN Isoform 3 of Poly(U)-binding-
Proteasome (Prosome, macropain) 26S subunit, ATPase, 1 OS	PSMC1	49.184	0.799592	-0.584417	-0.502832	-1.07954	-0.170881	50	135330000	50358000	41456000	71314000	27911000	20248000	25896000	10996000	6276400	38123000	11451000	14932000	6	4	5	22.5	20.7	12.3	17	>tr|Q53XL8|Q53XL8_HUMAN Proteasome (Prosome, macropain) 26S subunit, ATPase, 1 OS=Homo sapiens GN=PSMC1 PE=2 SV=1;>tr|Q53HB3|Q53HB3_HUMAN Proteasome 26S ATPase subunit 1 variant (Fragment) OS=Homo sapiens PE=1 SV=1;>sp|P62191|PRS4_HUMAN 26S protease regula
26S protease regulatory subunit 6A OS	PSMC3	44.323	0.788945	-0.656441	-0.493967	-1.24318	-0.232176	31	157040000	62621000	43633000	60304000	23950000	15846000	43738000	21426000	8649500	53002000	17244000	19137000	8	7	6	38.8	34	30	25.2	>tr|E9PM69|E9PM69_HUMAN 26S protease regulatory subunit 6A OS=Homo sapiens GN=PSMC3 PE=1 SV=1;>tr|R4GNH3|R4GNH3_HUMAN 26S protease regulatory subunit 6A OS=Homo sapiens GN=PSMC3 PE=1 SV=1;>sp|P17980|PRS6A_HUMAN 26S protease regulatory subunit 6A OS=Homo sa
Histone H2A OS	HIST1H2AH	13.906	0.788863	0.483071	0.23634	0.928124	0.284751	825	1278800000	405010000	436160000	659280000	254720000	182790000	277490000	48863000	113960000	342060000	101430000	139410000	4	3	4	32.8	32.8	32.8	32.8	>tr|A3KPC7|A3KPC7_HUMAN Histone H2A OS=Homo sapiens GN=HIST1H2AH PE=2 SV=1;>sp|Q99878|H2A1J_HUMAN Histone H2A type 1-J OS=Homo sapiens GN=HIST1H2AJ PE=1 SV=3;>sp|Q96KK5|H2A1H_HUMAN Histone H2A type 1-H OS=Homo sapiens GN=HIST1H2AH PE=1 SV=3;>tr|A0A024RAS2|
HNRPR protein (Fragment) OS	HNRPR	67.86	0.786274	-0.654408	-0.711748	-0.102899	-1.14858	34	344950000	137530000	93739000	151840000	64993000	34328000	80610000	28388000	29851000	112500000	44151000	29560000	10	9	9	31.6	31.6	27.7	27.7	>tr|Q0VGD6|Q0VGD6_HUMAN HNRPR protein (Fragment) OS=Homo sapiens GN=HNRPR PE=2 SV=1;>sp|O43390|HNRPR_HUMAN Heterogeneous nuclear ribonucleoprotein R OS=Homo sapiens GN=HNRNPR PE=1 SV=1;>tr|Q6MZS5|Q6MZS5_HUMAN Putative uncharacterized protein DKFZp686A13234
NADH dehydrogenase (Ubiquinone) Fe-S protein 6, 13kDa (NADH-coenzyme Q reductase), isoform CRA	NDUFS6	13.711	0.782565	0.0589269	0.0697021	0.10017	0.00690831	668	51691000	17672000	17592000	13624000	5602700	3670100	27385000	9060200	9806200	10682000	3009000	4115300	2	4	2	45.2	29.8	45.2	21.8	>tr|Q6IBC4|Q6IBC4_HUMAN NADH dehydrogenase (Ubiquinone) Fe-S protein 6, 13kDa (NADH-coenzyme Q reductase), isoform CRA_a OS=Homo sapiens GN=NDUFS6 PE=2 SV=1;>sp|O75380|NDUS6_HUMAN NADH dehydrogenase [ubiquinone] iron-sulfur protein 6, mitochondrial OS=Homo
ATP-dependent RNA helicase DDX1 OS	DDX1	82.431	0.778767	-0.53723	-0.312653	-1.03978	-0.259254	74	328710000	128400000	98098000	153710000	61867000	42824000	57624000	31109000	10794000	117380000	35422000	44480000	11	9	13	30	22.7	20.4	26.2	>tr|A3RJH1|A3RJH1_HUMAN ATP-dependent RNA helicase DDX1 OS=Homo sapiens GN=DDX1 PE=2 SV=1;>sp|Q92499|DDX1_HUMAN ATP-dependent RNA helicase DDX1 OS=Homo sapiens GN=DDX1 PE=1 SV=2;>tr|F1T0B3|F1T0B3_HUMAN ATP-dependent RNA helicase DDX1 OS=Homo sapiens GN=DDX
Tumor rejection antigen (Gp96) 1 OS	TRA1	92.339	0.774009	-0.0860903	-0.122633	-0.130681	-0.00495696	449	3574900000	1150800000	1250900000	1462600000	538180000	461510000	940260000	275320000	319050000	1172000000	337250000	470380000	29	29	30	42.4	40.4	41.3	40	>tr|Q5CAQ5|Q5CAQ5_HUMAN Tumor rejection antigen (Gp96) 1 OS=Homo sapiens GN=TRA1 PE=2 SV=1;>tr|V9HWP2|V9HWP2_HUMAN Epididymis luminal protein 35 OS=Homo sapiens GN=HEL-S-125m PE=2 SV=1;>sp|P14625|ENPL_HUMAN Endoplasmin OS=Homo sapiens GN=HSP90B1 PE=1 SV=1;
Sideroflexin-1 OS	SFXN1	35.619	0.769093	0.0832421	0.161178	0.0563061	0.032242	696	793010000	249120000	286030000	323050000	103330000	106920000	215780000	68950000	74056000	254170000	76845000	105050000	8	8	9	37.3	31.1	31.1	37.3	>sp|Q9H9B4|SFXN1_HUMAN Sideroflexin-1 OS=Homo sapiens GN=SFXN1 PE=1 SV=4
Heterogeneous nuclear ribonucleoprotein K, isoform CRA	HNRPK	51.218	0.767645	-0.328547	-0.608716	-0.067334	-0.309592	203	1349300000	495800000	419250000	567090000	248330000	140690000	391830000	134400000	139360000	390420000	113080000	139200000	15	17	15	49.9	43.4	49.7	40	>tr|A0A024R228|A0A024R228_HUMAN Heterogeneous nuclear ribonucleoprotein K, isoform CRA_d OS=Homo sapiens GN=HNRPK PE=4 SV=1;>sp|P61978|HNRPK_HUMAN Heterogeneous nuclear ribonucleoprotein K OS=Homo sapiens GN=HNRNPK PE=1 SV=1;>tr|Q6IBN1|Q6IBN1_HUMAN HNRPK p
26S proteasome non-ATPase regulatory subunit 6 OS	PSMD6	45.531	0.764663	-0.676779	-0.344007	-1.32467	-0.361657	28	237990000	81577000	72532000	87677000	31906000	25682000	57040000	22859000	12709000	93278000	26812000	34142000	7	5	6	20.6	20.6	14.7	18.3	>sp|Q15008|PSMD6_HUMAN 26S proteasome non-ATPase regulatory subunit 6 OS=Homo sapiens GN=PSMD6 PE=1 SV=1;>sp|Q15008-4|PSMD6_HUMAN Isoform 4 of 26S proteasome non-ATPase regulatory subunit 6 OS=Homo sapiens GN=PSMD6;>tr|C9J7B7|C9J7B7_HUMAN 26S proteasome no
cDNA FLJ57240, highly similar to Mitochondrial proteins import receptor OS		56.93	0.755807	0.248817	0.121413	0.490159	0.134878	784	279180000	83348000	104860000	116750000	39505000	38933000	98635000	23293000	40942000	63795000	20551000	24988000	6	6	6	18.2	16.2	15.6	16.2	>tr|B4DZ87|B4DZ87_HUMAN cDNA FLJ57240, highly similar to Mitochondrial proteins import receptor OS=Homo sapiens PE=2 SV=1;>sp|O94826|TOM70_HUMAN Mitochondrial import receptor subunit TOM70 OS=Homo sapiens GN=TOMM70A PE=1 SV=1
cDNA, FLJ79164, highly similar to Tubulin beta-7 chain OS		46.566	0.755422	-0.58381	-0.388695	-1.14232	-0.220412	51	94443000	34440000	27720000	37673000	13651000	12321000	27728000	12910000	6087200	29042000	7878700	9311900	2	2	2	37.3	33.7	26.5	28.4	>tr|B7ZAF0|B7ZAF0_HUMAN cDNA, FLJ79164, highly similar to Tubulin beta-7 chain OS=Homo sapiens PE=2 SV=1;>tr|Q5JP53|Q5JP53_HUMAN Tubulin beta chain OS=Homo sapiens GN=TUBB PE=1 SV=1;>tr|Q5SU16|Q5SU16_HUMAN Beta 5-tubulin OS=Homo sapiens GN=TUBB PE=2 SV=1;>
Isoform 2 of 26S proteasome non-ATPase regulatory subunit 3 OS	PSMD3	41.183	0.750449	-0.412624	-0.373738	-0.780091	-0.0840432	149	111200000	40656000	32540000	53880000	21588000	14008000	24949000	10456000	7191900	32375000	8613100	11340000	3	3	3	11.2	11.2	11.2	11.2	>sp|O43242-2|PSMD3_HUMAN Isoform 2 of 26S proteasome non-ATPase regulatory subunit 3 OS=Homo sapiens GN=PSMD3;>tr|B3KNN7|B3KNN7_HUMAN cDNA FLJ30049 fis, clone ADRGL1000033, highly similar to 26S proteasome non-ATPase regulatory subunit 3 OS=Homo sapiens PE
TAR DNA-binding protein 43 (Fragment) OS	TARDBP	26.743	0.747699	-0.276198	-0.547173	-0.12762	-0.1538	254	85497000	29882000	28166000	33590000	14023000	10195000	25325000	8526700	8186400	26581000	7332500	9783900	3	3	3	16	16	16	16	>tr|A0A087WX29|A0A087WX29_HUMAN TAR DNA-binding protein 43 (Fragment) OS=Homo sapiens GN=TARDBP PE=4 SV=1;>tr|B4DRW3|B4DRW3_HUMAN cDNA FLJ57180, highly similar to TAR DNA-binding protein 43 OS=Homo sapiens PE=2 SV=1;>tr|A0A024R4E2|A0A024R4E2_HUMAN TAR DNA
cDNA FLJ75700, highly similar to Homo sapiens complement component 1, q subcomponent binding protein (C1QBP), nuclear gene encoding mitochondrial protein, mRNA OS		31.38	0.745583	-0.123034	-0.0108464	-0.219052	-0.139204	398	185000000	63394000	62249000	58894000	20310000	20215000	67716000	23822000	21080000	58392000	19262000	20954000	4	4	4	25.2	25.2	25.2	25.2	>tr|A8K651|A8K651_HUMAN cDNA FLJ75700, highly similar to Homo sapiens complement component 1, q subcomponent binding protein (C1QBP), nuclear gene encoding mitochondrial protein, mRNA OS=Homo sapiens PE=2 SV=1;>sp|Q07021|C1QBP_HUMAN Complement component 1
26S proteasome non-ATPase regulatory subunit 2 OS	PSMD2	100.2	0.744358	-0.555522	-0.320216	-1.10243	-0.243916	63	256840000	93535000	78414000	113310000	43978000	33656000	52501000	22202000	13686000	91027000	27356000	31072000	11	9	12	17.4	14.1	11.8	16.2	>sp|Q13200|PSMD2_HUMAN 26S proteasome non-ATPase regulatory subunit 2 OS=Homo sapiens GN=PSMD2 PE=1 SV=3;>tr|Q59EG8|Q59EG8_HUMAN Proteasome 26S non-ATPase subunit 2 variant (Fragment) OS=Homo sapiens PE=2 SV=1;>tr|B4DM22|B4DM22_HUMAN cDNA FLJ53357, highly
Filamin A OS	FLNA	277.5	0.741078	-0.558008	-0.00453715	-0.815021	-0.854466	62	1968000000	765520000	643960000	812940000	247610000	278620000	476360000	210740000	142190000	678690000	307170000	223150000	44	46	42	36.3	29.2	30.7	27.9	>tr|Q60FE6|Q60FE6_HUMAN Filamin A OS=Homo sapiens GN=FLNA PE=2 SV=1;>tr|Q60FE5|Q60FE5_HUMAN Filamin A OS=Homo sapiens GN=FLNA PE=1 SV=1;>sp|P21333-2|FLNA_HUMAN Isoform 2 of Filamin-A OS=Homo sapiens GN=FLNA;>sp|P21333|FLNA_HUMAN Filamin-A OS=Homo sapiens G
Isoform 2 of 26S proteasome non-ATPase regulatory subunit 12 OS	PSMD12	50.578	0.737565	-0.559478	-0.297271	-1.11757	-0.263594	60	139300000	48682000	42156000	60581000	21137000	18130000	27393000	11711000	6593500	51322000	15833000	17432000	8	6	7	25	25	20.2	21.8	>sp|O00232-2|PSD12_HUMAN Isoform 2 of 26S proteasome non-ATPase regulatory subunit 12 OS=Homo sapiens GN=PSMD12;>sp|O00232|PSD12_HUMAN 26S proteasome non-ATPase regulatory subunit 12 OS=Homo sapiens GN=PSMD12 PE=1 SV=3
Valyl-tRNA synthetase, isoform CRA	VARS	140.47	0.737333	-0.656371	-0.363178	-1.31058	-0.295358	32	191890000	67898000	57020000	88463000	37142000	23362000	35014000	12638000	11513000	68417000	18118000	22145000	8	5	6	9.8	9.1	5.1	6.6	>tr|A0A024RCN6|A0A024RCN6_HUMAN Valyl-tRNA synthetase, isoform CRA_a OS=Homo sapiens GN=VARS PE=4 SV=1;>sp|P26640|SYVC_HUMAN Valine--tRNA ligase OS=Homo sapiens GN=VARS PE=1 SV=4
PGRMC1 protein OS	PGRMC1	21.671	0.735646	1.22638	0.27035	1.03731	2.37148	846	82427000	11611000	30830000	41078000	5803900	6563900	9945000	2145600	3752300	31404000	3661300	20514000	2	2	2	21.5	11.3	14.4	11.3	>tr|Q6IB11|Q6IB11_HUMAN PGRMC1 protein OS=Homo sapiens GN=PGRMC1 PE=2 SV=1;>sp|O00264|PGRC1_HUMAN Membrane-associated progesterone receptor component 1 OS=Homo sapiens GN=PGRMC1 PE=1 SV=3;>sp|O00264-2|PGRC1_HUMAN Isoform 2 of Membrane-associated progestero
tRNA-splicing ligase RtcB homolog OS	RTCB	55.21	0.73063	-0.571287	-0.119573	-1.10721	-0.487075	54	425200000	155230000	138240000	134550000	49404000	42123000	113890000	51506000	25952000	176760000	54325000	70164000	9	9	9	29.3	24	22.2	21.2	>sp|Q9Y3I0|RTCB_HUMAN tRNA-splicing ligase RtcB homolog OS=Homo sapiens GN=RTCB PE=1 SV=1;>tr|B4DNA0|B4DNA0_HUMAN cDNA FLJ58027 OS=Homo sapiens PE=2 SV=1
Isoform 3 of Signal recognition particle subunit SRP68 OS	SRP68	32.85	0.729562	-0.495899	-0.269095	-0.99634	-0.222263	96	31580000	12138000	9276600	5919500	2486700	1684300	14538000	5483900	4145700	11122000	4167800	3446500	2	3	3	13.2	8.7	13.2	13.2	>sp|Q9UHB9-3|SRP68_HUMAN Isoform 3 of Signal recognition particle subunit SRP68 OS=Homo sapiens GN=SRP68;>tr|Q96K98|Q96K98_HUMAN cDNA FLJ14414 fis, clone HEMBA1004847, highly similar to SIGNAL RECOGNITION PARTICLE 68 KD PROTEIN OS=Homo sapiens PE=2 SV=1;>t
Receptor expression-enhancing protein 5 OS	REEP5	21.493	0.723262	0.305414	0.452174	-0.00613	0.470198	797	276650000	78199000	104060000	91186000	28626000	34529000	103870000	28785000	33811000	81590000	20789000	35718000	4	2	2	12.2	12.2	5.8	5.8	>sp|Q00765|REEP5_HUMAN Receptor expression-enhancing protein 5 OS=Homo sapiens GN=REEP5 PE=1 SV=3;>tr|B7Z6B3|B7Z6B3_HUMAN cDNA FLJ53094, highly similar to Receptor expression-enhancing protein 5 OS=Homo sapiens PE=2 SV=1;>tr|B7Z2A3|B7Z2A3_HUMAN cDNA FLJ598
Lysine--tRNA ligase OS	KARS	68.047	0.721604	-0.233002	-0.0579623	-0.460727	-0.180315	290	575620000	205890000	189500000	288770000	107260000	91283000	99376000	34936000	29055000	187470000	63700000	69164000	14	11	14	31.3	29.5	24.1	29.8	>sp|Q15046|SYK_HUMAN Lysine--tRNA ligase OS=Homo sapiens GN=KARS PE=1 SV=3;>sp|Q15046-2|SYK_HUMAN Isoform Mitochondrial of Lysine--tRNA ligase OS=Homo sapiens GN=KARS;>tr|Q6ZTI3|Q6ZTI3_HUMAN cDNA FLJ44621 fis, clone BRACE2016896, highly similar to Lysyl-tR
Multidrug resistance-associated protein 1 OS	ABCC1	171.59	0.714944	0.176432	0.0706641	0.358059	0.100574	762	719790000	208660000	259890000	286300000	95919000	91526000	213600000	53701000	79920000	219880000	59041000	88446000	23	19	21	22.9	20.6	16.6	19.8	>sp|P33527|MRP1_HUMAN Multidrug resistance-associated protein 1 OS=Homo sapiens GN=ABCC1 PE=1 SV=3;>tr|I3L4X2|I3L4X2_HUMAN Multidrug resistance-associated protein 1 (Fragment) OS=Homo sapiens GN=ABCC1 PE=1 SV=1;>sp|P33527-4|MRP1_HUMAN Isoform 4 of Multidru
Isoform 5 of Serrate RNA effector molecule homolog OS	SRRT	96.221	0.70736	-0.274344	-0.515748	-0.288258	-0.0190242	259	99473000	35399000	30521000	40772000	16999000	10405000	28462000	10906000	9425300	30238000	7494300	10691000	5	4	4	10.1	8.5	6.4	6.6	>sp|Q9BXP5-5|SRRT_HUMAN Isoform 5 of Serrate RNA effector molecule homolog OS=Homo sapiens GN=SRRT;>sp|Q9BXP5-4|SRRT_HUMAN Isoform 4 of Serrate RNA effector molecule homolog OS=Homo sapiens GN=SRRT;>sp|Q9BXP5-2|SRRT_HUMAN Isoform 2 of Serrate RNA effector
Isoform 2 of 26S proteasome non-ATPase regulatory subunit 1 OS	PSMD1	102.26	0.700463	-0.525727	-0.34452	-1.07182	-0.160847	77	133260000	50028000	37883000	51002000	19918000	13643000	46602000	19866000	10591000	35657000	10244000	13648000	6	8	7	18.2	11.5	14.5	11.1	>sp|Q99460-2|PSMD1_HUMAN Isoform 2 of 26S proteasome non-ATPase regulatory subunit 1 OS=Homo sapiens GN=PSMD1;>tr|B2R6D0|B2R6D0_HUMAN cDNA, FLJ92896, highly similar to Homo sapiens proteasome (prosome, macropain) 26S subunit, non-ATPase, 1 (PSMD1), mRNA OS
Isoform 5 of Minor histocompatibility antigen H13 OS	HM13	36.813	0.699913	0.377843	0.236952	0.772646	0.123931	808	415680000	108810000	157220000	144460000	48479000	47381000	145580000	28769000	57996000	125630000	31564000	51848000	4	4	4	13.7	13.7	13.7	13.7	>sp|Q8TCT9-5|HM13_HUMAN Isoform 5 of Minor histocompatibility antigen H13 OS=Homo sapiens GN=HM13;>sp|Q8TCT9|HM13_HUMAN Minor histocompatibility antigen H13 OS=Homo sapiens GN=HM13 PE=1 SV=1;>tr|A0A075B6F6|A0A075B6F6_HUMAN Minor histocompatibility antigen
cDNA FLJ54305, highly similar to Serum paraoxonase/arylesterase 2 (EC 3.1.1.2) OS		40.027	0.691776	0.512137	0.278342	1.0597	0.198368	828	406210000	103930000	160410000	167620000	52193000	61966000	112210000	20494000	44416000	126380000	31247000	54024000	6	7	7	30.3	22.6	25.9	24.5	>tr|B4DKM6|B4DKM6_HUMAN cDNA FLJ54305, highly similar to Serum paraoxonase/arylesterase 2 (EC 3.1.1.2) OS=Homo sapiens PE=2 SV=1;>tr|J3QT77|J3QT77_HUMAN Serum paraoxonase/arylesterase 2 OS=Homo sapiens GN=PON2 PE=1 SV=1;>sp|Q15165-3|PON2_HUMAN Isoform 3 of
24-kDa subunit of complex I (Fragment) OS	NDUFV2	25.43	0.686833	0.120134	0.00317045	0.129613	0.227618	728	57457000	18826000	20823000	23874000	8978200	7608000	17195000	4929900	6800900	16389000	4918100	6414200	3	4	4	23.8	18.2	23.8	23.8	>tr|Q9UEH5|Q9UEH5_HUMAN 24-kDa subunit of complex I (Fragment) OS=Homo sapiens GN=NDUFV2 PE=4 SV=1;>tr|Q6IPW4|Q6IPW4_HUMAN NADH dehydrogenase (Ubiquinone) flavoprotein 2, 24kDa OS=Homo sapiens GN=NDUFV2 PE=2 SV=1;>tr|Q6IB76|Q6IB76_HUMAN NDUFV2 protein OS=H
Isoform 2 of NADH dehydrogenase [ubiquinone] 1 beta subcomplex subunit 4 OS	NDUFB4	14.026	0.685689	-0.18538	-0.362974	-0.0153013	-0.177865	329	156000000	57572000	50104000	99367000	40183000	31010000	30320000	9261100	10812000	26308000	8127300	8281900	3	2	2	24.2	24.2	24.2	15.8	>sp|O95168-2|NDUB4_HUMAN Isoform 2 of NADH dehydrogenase [ubiquinone] 1 beta subcomplex subunit 4 OS=Homo sapiens GN=NDUFB4;>sp|O95168|NDUB4_HUMAN NADH dehydrogenase [ubiquinone] 1 beta subcomplex subunit 4 OS=Homo sapiens GN=NDUFB4 PE=1 SV=3;>tr|F2Z3P9|F2
28S ribosomal protein S23, mitochondrial OS	MRPS23	21.77	0.684231	-0.0866855	-0.16288	-0.0964835	-0.000692654	447	39619000	13443000	13093000	18613000	6503400	5428100	11101000	3775200	4062300	9905000	3164600	3603100	3	3	2	18.9	18.9	18.9	13.7	>sp|Q9Y3D9|RT23_HUMAN 28S ribosomal protein S23, mitochondrial OS=Homo sapiens GN=MRPS23 PE=1 SV=2;>tr|J3QLR8|J3QLR8_HUMAN 28S ribosomal protein S23, mitochondrial OS=Homo sapiens GN=MRPS23 PE=1 SV=1
cDNA FLJ35376 fis, clone SKMUS2004044, highly similar to Homo sapiens ribosomal protein L3 (RPL3), transcript variant 2, mRNA OS		40.144	0.683331	-0.567552	-0.156048	-1.17182	-0.374786	56	456230000	166760000	133890000	225400000	77817000	63888000	103110000	46418000	23586000	127720000	42530000	46416000	8	6	6	32.8	28.2	24	22	>tr|B3KS36|B3KS36_HUMAN cDNA FLJ35376 fis, clone SKMUS2004044, highly similar to Homo sapiens ribosomal protein L3 (RPL3), transcript variant 2, mRNA OS=Homo sapiens PE=2 SV=1;>tr|Q96QL0|Q96QL0_HUMAN Ribosomal protein L3 OS=Homo sapiens GN=RPL3 PE=2 SV=1;>
Putative pre-mRNA-splicing factor ATP-dependent RNA helicase DHX15 OS	DHX15	90.932	0.682135	-0.28002	-0.0655666	-0.575271	-0.199222	251	384900000	133670000	130980000	173170000	64466000	54486000	73386000	26778000	22482000	138350000	42423000	54009000	14	9	14	22	21.9	16	21.9	>sp|O43143|DHX15_HUMAN Putative pre-mRNA-splicing factor ATP-dependent RNA helicase DHX15 OS=Homo sapiens GN=DHX15 PE=1 SV=2;>tr|B4E0S6|B4E0S6_HUMAN cDNA FLJ55635, highly similar to pre-mRNA-splicing factorATP-dependent RNA helicase DHX15 (EC 3.6.1.-) OS=H
cDNA FLJ51907, highly similar to Stress-70 protein, mitochondrial OS		72.4	0.679679	-0.0597013	-0.108799	-0.0724676	0.00216244	489	8095500000	2609500000	2859700000	3329600000	1254900000	1069600000	2043900000	592780000	706470000	2722000000	761790000	1083600000	26	24	23	44.5	44.5	39.8	37	>tr|B7Z4V2|B7Z4V2_HUMAN cDNA FLJ51907, highly similar to Stress-70 protein, mitochondrial OS=Homo sapiens PE=2 SV=1;>sp|P38646|GRP75_HUMAN Stress-70 protein, mitochondrial OS=Homo sapiens GN=HSPA9 PE=1 SV=2;>tr|V9HW84|V9HW84_HUMAN Epididymis secretory sper
Flap endonuclease 1 OS	FEN1	42.592	0.675031	-0.507727	-0.508137	-0.992288	-0.0227567	89	183200000	68168000	54660000	86368000	36606000	26164000	46430000	17613000	9768800	50399000	13950000	18727000	6	4	4	22.1	22.1	16.6	16.6	>tr|Q6FHX6|Q6FHX6_HUMAN Flap endonuclease 1 OS=Homo sapiens GN=FEN1 PE=2 SV=1;>sp|P39748|FEN1_HUMAN Flap endonuclease 1 OS=Homo sapiens GN=FEN1 PE=1 SV=1;>sp|P39748-2|FEN1_HUMAN Isoform FENMIT of Flap endonuclease 1 OS=Homo sapiens GN=FEN1;>tr|B4DWZ4|B4DWZ
Ribosomal L1 domain-containing protein 1 (Fragment) OS	RSL1D1	48.208	0.673511	-0.476258	-0.310611	-0.126392	-0.991771	104	36421000	14443000	10947000	11842000	4054200	3524600	7038000	2592700	2651200	17541000	7795700	4771000	3	2	2	10.2	10.2	5.8	8.4	>tr|J3QSV6|J3QSV6_HUMAN Ribosomal L1 domain-containing protein 1 (Fragment) OS=Homo sapiens GN=RSL1D1 PE=1 SV=1;>tr|A0PJ61|A0PJ61_HUMAN RSL1D1 protein (Fragment) OS=Homo sapiens GN=RSL1D1 PE=2 SV=1;>tr|Q32Q62|Q32Q62_HUMAN RSL1D1 protein (Fragment) OS=Homo
cDNA, FLJ92652, highly similar to Homo sapiens high density lipoprotein binding protein (vigilin)(HDLBP), mRNA OS		141.38	0.670055	-0.759122	-0.24366	-1.59536	-0.438346	8	34900000	15222000	8920200	12229000	4688500	4140300	16313000	8993800	2623600	6358500	1540200	2156300	4	6	2	9.4	5.5	8	2.8	>tr|B2R5V9|B2R5V9_HUMAN cDNA, FLJ92652, highly similar to Homo sapiens high density lipoprotein binding protein (vigilin)(HDLBP), mRNA OS=Homo sapiens PE=2 SV=1;>tr|A0A024R4E5|A0A024R4E5_HUMAN High density lipoprotein binding protein (Vigilin), isoform CRA
Heterogeneous nuclear ribonucleoprotein F, isoform CRA	HNRPF	45.671	0.669954	-0.324909	-0.620379	0.00273846	-0.357086	207	194600000	69581000	59536000	84751000	34873000	22473000	56121000	17162000	17948000	53726000	17546000	19116000	5	4	4	24.6	24.6	21.4	21.4	>tr|A0A024R7T3|A0A024R7T3_HUMAN Heterogeneous nuclear ribonucleoprotein F, isoform CRA_a OS=Homo sapiens GN=HNRPF PE=4 SV=1;>sp|P52597|HNRPF_HUMAN Heterogeneous nuclear ribonucleoprotein F OS=Homo sapiens GN=HNRNPF PE=1 SV=3;>tr|B4DKS8|B4DKS8_HUMAN cDNA FL
cDNA FLJ57955, highly similar to Adapter-relatedprotein complex 2 alpha- 2 subunit OS		75.158	0.669338	-0.263791	-0.457098	0.0241777	-0.358454	267	25863000	9911200	8408600	9656000	4144500	2951700	7059000	2274800	2852100	9147600	3491900	2604900	3	2	2	12.8	10.2	7.7	10.3	>tr|B7Z1Q4|B7Z1Q4_HUMAN cDNA FLJ57955, highly similar to Adapter-relatedprotein complex 2 alpha- 2 subunit OS=Homo sapiens PE=2 SV=1;>tr|B7Z5S9|B7Z5S9_HUMAN cDNA FLJ61359, highly similar to Adapter-relatedprotein complex 2 alpha- 2 subunit OS=Homo sapiens
Isoform 2 of Heterogeneous nuclear ribonucleoprotein A1 OS	HNRNPA1	29.386	0.669042	-0.197013	-0.279214	0.0201999	-0.332026	318	980380000	344540000	326490000	392480000	139780000	103140000	259360000	105740000	93978000	328540000	99016000	129370000	10	12	9	56.6	46.4	56.6	47.9	>sp|P09651-3|ROA1_HUMAN Isoform 2 of Heterogeneous nuclear ribonucleoprotein A1 OS=Homo sapiens GN=HNRNPA1;>tr|F8W6I7|F8W6I7_HUMAN Heterogeneous nuclear ribonucleoprotein A1 OS=Homo sapiens GN=HNRNPA1 PE=1 SV=2;>tr|Q0VAC0|Q0VAC0_HUMAN Heterogeneous nuclear
Dinucleotide oxidase disulfide thiol exchanger 3 superfamily member 3 OS		67.887	0.668384	0.405454	0.177344	0.857344	0.181675	811	652260000	182810000	239900000	267380000	83255000	82690000	190980000	50963000	72147000	193900000	48589000	85068000	10	10	12	21.2	16.6	18.3	21.2	>tr|A0A024QYS2|A0A024QYS2_HUMAN Dinucleotide oxidase disulfide thiol exchanger 3 superfamily member 3 OS=Homo sapiens PE=2 SV=1;>sp|Q9HD45|TM9S3_HUMAN Transmembrane 9 superfamily member 3 OS=Homo sapiens GN=TM9SF3 PE=1 SV=2;>tr|Q96JZ5|Q96JZ5_HUMAN SM-11044
Thioredoxin-related transmembrane protein 1 OS	TMX1	31.791	0.668239	0.823071	0.544288	1.71953	0.205393	839	342330000	80513000	149410000	105980000	35536000	43134000	146170000	22883000	73719000	90181000	22094000	32556000	4	7	5	26.4	18.6	26.1	22.5	>sp|Q9H3N1|TMX1_HUMAN Thioredoxin-related transmembrane protein 1 OS=Homo sapiens GN=TMX1 PE=1 SV=1;>tr|B4DZX7|B4DZX7_HUMAN Thioredoxin domain containing, isoform CRA_b OS=Homo sapiens GN=TXNDC PE=2 SV=1
Isoform 2 of Heterogeneous nuclear ribonucleoprotein M OS	HNRNPM	73.62	0.666108	-0.406174	-0.841922	-0.0767215	-0.29988	157	1126800000	409250000	350460000	438280000	202220000	99464000	314630000	97172000	126330000	373850000	109860000	124670000	15	16	16	40.5	31.8	32.3	36.5	>sp|P52272-2|HNRPM_HUMAN Isoform 2 of Heterogeneous nuclear ribonucleoprotein M OS=Homo sapiens GN=HNRNPM;>tr|A0A087X0X3|A0A087X0X3_HUMAN Heterogeneous nuclear ribonucleoprotein M OS=Homo sapiens GN=HNRNPM PE=4 SV=1;>sp|P52272|HNRPM_HUMAN Heterogeneous nuc
Isoform 2 of Trifunctional enzyme subunit beta, mitochondrial OS	HADHB	48.879	0.665204	-0.0605317	-0.0580824	-0.120451	-0.00306179	488	734940000	241550000	266090000	285110000	104100000	94729000	184490000	61452000	63586000	265340000	76006000	107770000	13	12	13	37.8	29.4	29.9	31.9	>sp|P55084-2|ECHB_HUMAN Isoform 2 of Trifunctional enzyme subunit beta, mitochondrial OS=Homo sapiens GN=HADHB;>sp|P55084|ECHB_HUMAN Trifunctional enzyme subunit beta, mitochondrial OS=Homo sapiens GN=HADHB PE=1 SV=3;>tr|B4DY96|B4DY96_HUMAN cDNA FLJ55769,
Signal peptidase complex subunit 1 OS	SPCS1	11.805	0.660421	0.12457	0.138159	-0.00348108	0.239031	731	175650000	52505000	73077000	68190000	17007000	24387000	46186000	21384000	12762000	61268000	14115000	35928000	2	2	2	26.5	26.5	26.5	26.5	>sp|Q9Y6A9|SPCS1_HUMAN Signal peptidase complex subunit 1 OS=Homo sapiens GN=SPCS1 PE=1 SV=4;>tr|C9JBL1|C9JBL1_HUMAN Signal peptidase complex subunit 1 OS=Homo sapiens GN=SPCS1 PE=1 SV=1;>tr|X6R2S6|X6R2S6_HUMAN Signal peptidase complex subunit 1 OS=Homo sa
cDNA, FLJ79193, highly similar to Beta-1,4-galactosyltransferase 1 (EC 2.4.1.-) OS		29.976	0.660377	0.0696813	0.0657101	0.00360232	0.139731	680	173550000	56845000	61423000	68069000	24487000	21507000	59695000	18822000	21851000	45790000	13536000	18064000	4	5	4	27.9	20.2	27.9	20.2	>tr|B7ZAH9|B7ZAH9_HUMAN cDNA, FLJ79193, highly similar to Beta-1,4-galactosyltransferase 1 (EC 2.4.1.-) OS=Homo sapiens PE=2 SV=1;>tr|B4DLB8|B4DLB8_HUMAN cDNA FLJ52205, highly similar to Beta-1,4-galactosyltransferase 1 (EC 2.4.1.-) OS=Homo sapiens PE=2 SV
DIS3 OS		109.06	0.660044	-0.601014	-0.660908	-1.15692	0.0147838	42	49019000	18513000	14621000	25644000	10102000	7232600	9569300	4171000	2031500	13806000	4239500	5357200	3	3	5	7.2	4.3	4.1	7.2	>tr|A8QI98|A8QI98_HUMAN DIS3 OS=Homo sapiens PE=2 SV=1;>sp|Q9Y2L1|RRP44_HUMAN Exosome complex exonuclease RRP44 OS=Homo sapiens GN=DIS3 PE=1 SV=2;>tr|F2Z2C0|F2Z2C0_HUMAN Exosome complex exonuclease RRP44 OS=Homo sapiens GN=DIS3 PE=1 SV=1;>tr|Q49AG4|Q49AG4_
cDNA FLJ75273, highly similar to Homo sapiens solute carrier family 25 (mitochondrial carrier;adenine nucleotide translocator), member 4, mRNA OS		33.08	0.651061	0.144906	0.0659859	0.311038	0.0576928	750	77002000	20573000	25018000	29034000	9773000	9185600	12590000	3454100	4772400	35378000	7345700	11060000	2	2	3	31.9	28.9	23.8	31.5	>tr|A8K787|A8K787_HUMAN cDNA FLJ75273, highly similar to Homo sapiens solute carrier family 25 (mitochondrial carrier;adenine nucleotide translocator), member 4, mRNA OS=Homo sapiens PE=2 SV=1;>sp|P12235|ADT1_HUMAN ADP/ATP translocase 1 OS=Homo sapiens GN
HIST1H2BC protein OS	HIST1H2BC	13.834	0.650528	0.126923	-0.014587	0.227741	0.167615	732	1006100000	292740000	368360000	473400000	163950000	148490000	254500000	52464000	93392000	278150000	76323000	126480000	2	2	2	19	19	19	19	>tr|Q0D2M2|Q0D2M2_HUMAN HIST1H2BC protein OS=Homo sapiens GN=HIST1H2BC PE=2 SV=1;>tr|B2R4S9|B2R4S9_HUMAN Histone H2B OS=Homo sapiens GN=HIST1H2BC PE=2 SV=1;>tr|A8K9J7|A8K9J7_HUMAN Histone H2B OS=Homo sapiens PE=2 SV=1;>tr|A0A024RCL8|A0A024RCL8_HUMAN Histon
26S protease regulatory subunit 7 OS	PSMC2	48.633	0.650416	-0.708396	-0.411829	-1.5126	-0.200763	16	240030000	100320000	63579000	131010000	62294000	30757000	47727000	19503000	10023000	61292000	18528000	22799000	9	7	7	30.7	30.7	24.5	22.9	>sp|P35998|PRS7_HUMAN 26S protease regulatory subunit 7 OS=Homo sapiens GN=PSMC2 PE=1 SV=3;>tr|Q75L23|Q75L23_HUMAN Putative uncharacterized protein PSMC2 (Fragment) OS=Homo sapiens GN=PSMC2 PE=3 SV=1
Mitochondrial intermediate peptidase OS	MIPEP	80.64	0.649826	-0.126456	-0.179237	-0.21734	0.0172092	395	155550000	51386000	54390000	77010000	26960000	25748000	15520000	5171700	5287500	63024000	19254000	23354000	8	4	8	17.4	15.8	8.4	14.6	>sp|Q99797|MIPEP_HUMAN Mitochondrial intermediate peptidase OS=Homo sapiens GN=MIPEP PE=1 SV=2
Serine/arginine-rich-splicing factor 2 (Fragment) OS	SRSF2	15.156	0.647484	-0.236763	-0.215697	-0.483178	-0.0114134	285	205300000	66626000	66405000	77180000	30164000	24164000	60202000	19187000	19696000	67922000	17275000	22545000	4	4	4	32.3	32.3	32.3	32.3	>tr|J3QL05|J3QL05_HUMAN Serine/arginine-rich-splicing factor 2 (Fragment) OS=Homo sapiens GN=SRSF2 PE=1 SV=1;>tr|J3KP15|J3KP15_HUMAN Serine/arginine-rich-splicing factor 2 (Fragment) OS=Homo sapiens GN=SRSF2 PE=1 SV=3;>tr|Q8NAK9|Q8NAK9_HUMAN cDNA FLJ35170
Nicotinamide nucleotide transhydrogenase OS	NNT	113.88	0.642956	0.311897	0.0962619	0.672199	0.167229	799	298370000	82483000	109070000	129210000	41037000	39613000	74075000	16666000	30701000	95091000	24780000	38753000	12	8	10	15.2	15.2	9.9	12.3	>tr|Q2TB59|Q2TB59_HUMAN Nicotinamide nucleotide transhydrogenase OS=Homo sapiens GN=NNT PE=2 SV=1;>tr|A0A024R0C3|A0A024R0C3_HUMAN Nicotinamide nucleotide transhydrogenase, isoform CRA_a OS=Homo sapiens GN=NNT PE=4 SV=1;>sp|Q13423|NNTM_HUMAN NAD(P) transhyd
cDNA FLJ77398, highly similar to Homo sapiens UDP-glucose ceramide glucosyltransferase-like 1, transcript variant 2, mRNA OS		175	0.638549	-0.151523	0.00532815	-0.30187	-0.158027	370	1370000000	460880000	465970000	618320000	226260000	204520000	364910000	113640000	118240000	386770000	120980000	143220000	28	28	22	28.4	25.5	24.6	17.8	>tr|A8KAK1|A8KAK1_HUMAN cDNA FLJ77398, highly similar to Homo sapiens UDP-glucose ceramide glucosyltransferase-like 1, transcript variant 2, mRNA OS=Homo sapiens PE=2 SV=1;>sp|Q9NYU2-2|UGGG1_HUMAN Isoform 2 of UDP-glucose:glycoprotein glucosyltransferase 1
Multidrug resistance-associated protein 4 OS	ABCC4	149.52	0.634815	0.0594689	0.0455827	0.00690831	0.125916	671	88102000	26822000	30708000	33696000	10484000	10392000	31097000	10112000	10747000	23309000	6225200	9569200	5	5	5	7.9	6.5	5.3	5.4	>sp|O15439|MRP4_HUMAN Multidrug resistance-associated protein 4 OS=Homo sapiens GN=ABCC4 PE=1 SV=3;>tr|O75555|O75555_HUMAN ABC transporter MOAT-B isoform (Fragment) OS=Homo sapiens GN=MOAT-B PE=2 SV=1;>sp|O15439-2|MRP4_HUMAN Isoform 2 of Multidrug resistan
Epididymis secretory sperm binding protein Li 89n OS	HEL-S-89n	72.332	0.629057	0.0675202	0.146264	0.042084	0.0142124	677	3539900000	1043400000	1250800000	1265800000	408790000	423930000	1181700000	333540000	386400000	1092400000	301090000	440470000	26	25	25	45.7	44.8	44.5	42.7	>tr|V9HWB4|V9HWB4_HUMAN Epididymis secretory sperm binding protein Li 89n OS=Homo sapiens GN=HEL-S-89n PE=2 SV=1;>sp|P11021|GRP78_HUMAN 78 kDa glucose-regulated protein OS=Homo sapiens GN=HSPA5 PE=1 SV=2;>tr|B4DEF7|B4DEF7_HUMAN cDNA FLJ60062, highly simila
Putative uncharacterized protein DKFZp686E23276 (Fragment) OS	DKFZp686E23276	37.045	0.62769	0.714329	0.201258	1.56023	0.381505	834	519530000	117740000	214570000	181710000	60923000	60000000	204410000	27788000	99519000	133420000	29028000	55048000	5	5	4	22.6	22.6	22.6	18.6	>tr|Q68D64|Q68D64_HUMAN Putative uncharacterized protein DKFZp686E23276 (Fragment) OS=Homo sapiens GN=DKFZp686E23276 PE=2 SV=1;>tr|J3QRD1|J3QRD1_HUMAN Fatty aldehyde dehydrogenase OS=Homo sapiens GN=ALDH3A2 PE=1 SV=1;>tr|Q59H65|Q59H65_HUMAN Aldehyde dehydr
Delta-1-pyrroline-5-carboxylate synthase OS	ALDH18A1	87.301	0.618397	-0.0731194	-0.123701	0.015212	-0.110869	467	1211400000	405300000	420810000	568590000	221980000	182000000	284270000	82522000	106530000	358590000	100800000	132270000	17	17	17	38.1	29.3	28.8	27.4	>sp|P54886|P5CS_HUMAN Delta-1-pyrroline-5-carboxylate synthase OS=Homo sapiens GN=ALDH18A1 PE=1 SV=2;>sp|P54886-2|P5CS_HUMAN Isoform Short of Delta-1-pyrroline-5-carboxylate synthase OS=Homo sapiens GN=ALDH18A1
Transmembrane protein 126A OS	TMEM126A	21.527	0.613565	0.456025	0.567351	0.87342	-0.0726951	821	89314000	23741000	34892000	35027000	10771000	13042000	30517000	6648100	11461000	23769000	6321800	10389000	3	4	3	25.1	20.5	25.1	20.5	>sp|Q9H061|T126A_HUMAN Transmembrane protein 126A OS=Homo sapiens GN=TMEM126A PE=1 SV=1;>tr|E9PI90|E9PI90_HUMAN Transmembrane protein 126A OS=Homo sapiens GN=TMEM126A PE=1 SV=1;>sp|Q9H061-2|T126A_HUMAN Isoform 2 of Transmembrane protein 126A OS=Homo sapien
Isoform 2 of Enoyl-CoA delta isomerase 1, mitochondrial OS	ECI1	30.895	0.612943	0.134312	0.0413831	0.298189	0.0633648	739	271580000	80409000	104240000	73849000	23433000	26156000	99022000	27394000	37401000	98705000	29581000	40683000	2	3	4	16.1	9.8	13.3	16.1	>sp|P42126-2|ECI1_HUMAN Isoform 2 of Enoyl-CoA delta isomerase 1, mitochondrial OS=Homo sapiens GN=ECI1;>sp|P42126|ECI1_HUMAN Enoyl-CoA delta isomerase 1, mitochondrial OS=Homo sapiens GN=ECI1 PE=1 SV=1;>tr|Q96DC0|Q96DC0_HUMAN DCI protein OS=Homo sapiens G
Aminopeptidase B OS	RNPEP	68.168	0.612633	-0.470096	0.0668125	-0.918224	-0.558878	109	93713000	27755000	32827000	35814000	11692000	12169000	19322000	5254200	9407200	38576000	10809000	11252000	6	4	6	15.7	12.8	9.5	13.4	>tr|A6NKB8|A6NKB8_HUMAN Aminopeptidase B OS=Homo sapiens GN=RNPEP PE=1 SV=1;>sp|Q9H4A4|AMPB_HUMAN Aminopeptidase B OS=Homo sapiens GN=RNPEP PE=1 SV=2;>tr|Q7RU04|Q7RU04_HUMAN Aminopeptidase B OS=Homo sapiens GN=RNPEP PE=4 SV=1
cDNA, FLJ95265, highly similar to Homo sapiens acetyl-Coenzyme A acyltransferase 2 (mitochondrial 3-oxoacyl-Coenzyme A thiolase) (ACAA2), nuclear gene encoding mitochondrial protein, mRNA OS		42.009	0.612496	-0.30935	-0.600818	-0.373234	0.0460021	224	446870000	162990000	144500000	234590000	101920000	71096000	79135000	27685000	27759000	133150000	33384000	45649000	9	7	8	41.3	36	27.7	38	>tr|B2RB23|B2RB23_HUMAN cDNA, FLJ95265, highly similar to Homo sapiens acetyl-Coenzyme A acyltransferase 2 (mitochondrial 3-oxoacyl-Coenzyme A thiolase) (ACAA2), nuclear gene encoding mitochondrial protein, mRNA OS=Homo sapiens PE=2 SV=1;>sp|P42765|THIM_HU
Epididymis secretory protein Li 73 OS	HEL-S-73	44.16	0.612249	-0.72312	-0.32054	-1.60792	-0.240895	11	102950000	38385000	31856000	58945000	22619000	16305000	9679900	4795800	1830900	34329000	10969000	13720000	7	2	6	30.6	27.8	11.3	24.2	>tr|V9HW24|V9HW24_HUMAN Epididymis secretory protein Li 73 OS=Homo sapiens GN=HEL-S-73 PE=2 SV=1;>sp|P62333|PRS10_HUMAN 26S protease regulatory subunit 10B OS=Homo sapiens GN=PSMC6 PE=1 SV=1;>tr|A0A087X2I1|A0A087X2I1_HUMAN 26S protease regulatory subunit 1
Isoform 2 of NADH dehydrogenase [ubiquinone] flavoprotein 1, mitochondrial OS	NDUFV1	49.867	0.610676	0.095786	-0.0191412	0.175173	0.131326	713	87774000	26854000	29745000	41926000	14800000	12646000	24806000	7457600	8756200	21042000	4596000	8342500	6	5	3	17.8	17.8	14.5	7.7	>sp|P49821-2|NDUV1_HUMAN Isoform 2 of NADH dehydrogenase [ubiquinone] flavoprotein 1, mitochondrial OS=Homo sapiens GN=NDUFV1;>tr|G3V0I5|G3V0I5_HUMAN NADH dehydrogenase (Ubiquinone) flavoprotein 1, 51kDa, isoform CRA_c OS=Homo sapiens GN=NDUFV1 PE=1 SV=1;>
Proteasome (Prosome, macropain) 26S subunit, ATPase, 4, isoform CRA	PSMC4	47.366	0.608636	-0.624672	-0.818656	-1.17319	0.117828	37	194470000	50695000	94285000	56191000	21808000	9247400	32662000	15231000	8415500	105620000	13655000	76622000	5	6	7	34.4	24.4	22.2	26.6	>tr|A8K2M0|A8K2M0_HUMAN Proteasome (Prosome, macropain) 26S subunit, ATPase, 4, isoform CRA_b OS=Homo sapiens GN=PSMC4 PE=2 SV=1;>sp|P43686|PRS6B_HUMAN 26S protease regulatory subunit 6B OS=Homo sapiens GN=PSMC4 PE=1 SV=2;>sp|P43686-2|PRS6B_HUMAN Isoform 2
Eukaryotic translation elongation factor 1 beta 2, isoform CRA	EEF1B2	24.763	0.608006	-0.523074	-0.13253	-1.16359	-0.273099	80	131100000	48090000	39055000	49403000	18175000	16300000	39132000	17132000	8159600	42563000	12783000	14596000	4	3	4	34.7	34.7	20.4	34.7	>tr|A0A024R3W7|A0A024R3W7_HUMAN Eukaryotic translation elongation factor 1 beta 2, isoform CRA_a OS=Homo sapiens GN=EEF1B2 PE=3 SV=1;>sp|P24534|EF1B_HUMAN Elongation factor 1-beta OS=Homo sapiens GN=EEF1B2 PE=1 SV=3;>tr|F2Z2G2|F2Z2G2_HUMAN Elongation facto
Alpha-actinin-4 OS	ACTN4	104.85	0.607303	0.351763	0.642933	-0.0733781	0.485736	805	5165300000	1332800000	2035900000	2488800000	714990000	1012200000	938860000	217830000	256540000	1737600000	399960000	767120000	21	19	22	58.4	53.6	52.7	56	>sp|O43707|ACTN4_HUMAN Alpha-actinin-4 OS=Homo sapiens GN=ACTN4 PE=1 SV=2;>tr|Q96BG6|Q96BG6_HUMAN ACTN4 protein (Fragment) OS=Homo sapiens GN=ACTN4 PE=2 SV=2;>sp|O43707-2|ACTN4_HUMAN Isoform ACTN4ISO of Alpha-actinin-4 OS=Homo sapiens GN=ACTN4;>tr|F5GXS2|F
Cell division cycle 42 (GTP binding protein, 25kDa), isoform CRA	CDC42	21.258	0.606771	-0.0741751	0.00115371	-0.157206	-0.0664727	462	95849000	31118000	33582000	34154000	13588000	11092000	27889000	9045500	8846300	33806000	8484100	13644000	3	2	3	25.1	25.1	14.1	25.1	>tr|A0A024RAE4|A0A024RAE4_HUMAN Cell division cycle 42 (GTP binding protein, 25kDa), isoform CRA_a OS=Homo sapiens GN=CDC42 PE=3 SV=1;>sp|P60953|CDC42_HUMAN Cell division control protein 42 homolog OS=Homo sapiens GN=CDC42 PE=1 SV=2;>tr|B7ZAY4|B7ZAY4_HUMAN
Isoform 2 of ADP-ribosylation factor-like protein 1 OS	ARL1	18.565	0.604158	-0.30926	-0.398037	-0.588682	0.0589399	225	23384000	9070800	6879800	11213000	5139200	2792600	4379900	1639500	1214900	7790800	2292100	2872400	3	2	3	25.6	25.6	20.1	25.6	>sp|P40616-2|ARL1_HUMAN Isoform 2 of ADP-ribosylation factor-like protein 1 OS=Homo sapiens GN=ARL1;>sp|P40616|ARL1_HUMAN ADP-ribosylation factor-like protein 1 OS=Homo sapiens GN=ARL1 PE=1 SV=1;>tr|F8VYN9|F8VYN9_HUMAN ADP-ribosylation factor-like protein
Isoform 3 of Lanosterol synthase OS	LSS	82.198	0.592517	0.452136	-0.0137712	0.974676	0.395502	818	30900000	8041000	12380000	10492000	3566600	3127600	6386400	1578100	2807900	14022000	2896300	6444600	3	3	3	7.4	5.7	5.5	5.3	>sp|P48449-3|ERG7_HUMAN Isoform 3 of Lanosterol synthase OS=Homo sapiens GN=LSS;>tr|B2R694|B2R694_HUMAN cDNA, FLJ92849, highly similar to Homo sapiens lanosterol synthase (2,3-oxidosqualene-lanosterol cyclase) (LSS), mRNA OS=Homo sapiens PE=2 SV=1;>sp|P484
Isocitrate dehydrogenase 2 (NADP+), mitochondrial variant (Fragment) OS		50.91	0.591084	-0.0994014	0.00518438	-0.213169	-0.0902192	425	220610000	69660000	76102000	105160000	36171000	35336000	60841000	18380000	20170000	54610000	15109000	20596000	8	7	6	25.2	25.2	22.8	17	>tr|Q53GL5|Q53GL5_HUMAN Isocitrate dehydrogenase 2 (NADP+), mitochondrial variant (Fragment) OS=Homo sapiens PE=2 SV=1;>sp|P48735|IDHP_HUMAN Isocitrate dehydrogenase [NADP], mitochondrial OS=Homo sapiens GN=IDH2 PE=1 SV=2;>sp|P48735-2|IDHP_HUMAN Isoform 2
HCG1745083 OS	RPS26	12.985	0.586684	-0.569931	0.0977456	-1.1603	-0.647242	55	44831000	16416000	13732000	17973000	5885200	5875100	13257000	5607700	3223700	13600000	4923200	4633400	2	2	2	20.9	20.9	20.9	20.9	>tr|Q75MH1|Q75MH1_HUMAN HCG1745083 OS=Homo sapiens GN=RPS26 PE=4 SV=1;>tr|A0A024RB14|A0A024RB14_HUMAN HCG20716 OS=Homo sapiens GN=RPS26 PE=4 SV=1;>sp|P62854|RS26_HUMAN 40S ribosomal protein S26 OS=Homo sapiens GN=RPS26 PE=1 SV=3;>tr|Q76N57|Q76N57_HUMAN Rib
cDNA FLJ61021, highly similar to Far upstream element-binding protein 1 OS		66.231	0.584571	-0.549496	-1.22324	-0.0273074	-0.397942	67	445830000	175010000	133020000	166530000	83215000	34428000	135260000	47982000	52404000	144040000	43816000	46185000	9	10	9	27	24.6	27	23.8	>tr|B4E0X8|B4E0X8_HUMAN cDNA FLJ61021, highly similar to Far upstream element-binding protein 1 OS=Homo sapiens PE=2 SV=1;>sp|Q96AE4|FUBP1_HUMAN Far upstream element-binding protein 1 OS=Homo sapiens GN=FUBP1 PE=1 SV=3;>tr|B4DT31|B4DT31_HUMAN cDNA FLJ53425
Serine-threonine kinase receptor-associated protein OS	STRAP	38.438	0.582572	-0.0544292	0.0136409	-0.103581	-0.0733478	499	65273000	15607000	26584000	29446000	8843200	14917000	25920000	3740700	7512000	9907100	3023000	4155700	4	3	2	18.6	18.6	14	8.9	>sp|Q9Y3F4|STRAP_HUMAN Serine-threonine kinase receptor-associated protein OS=Homo sapiens GN=STRAP PE=1 SV=1;>sp|Q9Y3F4-2|STRAP_HUMAN Isoform 2 of Serine-threonine kinase receptor-associated protein OS=Homo sapiens GN=STRAP;>tr|B0AZV0|B0AZV0_HUMAN cDNA, F
Heterogeneous nuclear ribonucleoprotein A/B OS	HNRNPAB	30.302	0.582515	-0.234255	0.0385766	-0.25758	-0.483763	289	184900000	69375000	56751000	68186000	29866000	17645000	39085000	12284000	13755000	77628000	27225000	25351000	2	2	2	12.9	12.9	12.9	12.9	>tr|D6R9P3|D6R9P3_HUMAN Heterogeneous nuclear ribonucleoprotein A/B OS=Homo sapiens GN=HNRNPAB PE=1 SV=1;>tr|D6RD18|D6RD18_HUMAN Heterogeneous nuclear ribonucleoprotein A/B OS=Homo sapiens GN=HNRNPAB PE=1 SV=1;>sp|Q99729-3|ROAA_HUMAN Isoform 3 of Heterogen
Transaldolase OS	TALDO1	37.54	0.581762	-0.513585	-0.331536	-1.15766	-0.0515636	86	894610000	321040000	272250000	408340000	162550000	128290000	245900000	87760000	51888000	240360000	70726000	92068000	7	7	5	26.1	22.3	23.7	17.2	>sp|P37837|TALDO_HUMAN Transaldolase OS=Homo sapiens GN=TALDO1 PE=1 SV=2;>tr|F2Z393|F2Z393_HUMAN Transaldolase OS=Homo sapiens GN=TALDO1 PE=1 SV=1
DEAD (Asp-Glu-Ala-Asp) box polypeptide 48, isoform CRA	DDX48	46.871	0.581615	0.428273	-0.0635901	0.89476	0.453649	815	383740000	112360000	148970000	176490000	65998000	58169000	112840000	19897000	46162000	94402000	26464000	44639000	11	9	10	33.6	33.6	25.5	31.9	>tr|A0A024R8W0|A0A024R8W0_HUMAN DEAD (Asp-Glu-Ala-Asp) box polypeptide 48, isoform CRA_a OS=Homo sapiens GN=DDX48 PE=3 SV=1;>sp|P38919|IF4A3_HUMAN Eukaryotic initiation factor 4A-III OS=Homo sapiens GN=EIF4A3 PE=1 SV=4
Isoform 2 of Cleft lip and palate transmembrane protein 1 OS	CLPTM1	65.596	0.580395	0.463188	0.0415233	1.04411	0.303927	823	122130000	34618000	45146000	56838000	20840000	17593000	38820000	8100800	16436000	26476000	5677400	11118000	4	5	2	16.6	13.4	13.6	6.5	>sp|O96005-3|CLPT1_HUMAN Isoform 2 of Cleft lip and palate transmembrane protein 1 OS=Homo sapiens GN=CLPTM1;>sp|O96005-4|CLPT1_HUMAN Isoform 3 of Cleft lip and palate transmembrane protein 1 OS=Homo sapiens GN=CLPTM1;>sp|O96005|CLPT1_HUMAN Cleft lip and p
cDNA FLJ54590, highly similar to KH domain-containing, RNA-binding, signaltransduction-associated protein 1 OS		46.459	0.579553	-0.680308	-1.06404	0.200379	-1.17726	26	121040000	50720000	37484000	43887000	21167000	8511100	40857000	13967000	20120000	36295000	15585000	8852600	4	4	3	13.2	13.2	13.2	8.5	>tr|B4DDX2|B4DDX2_HUMAN cDNA FLJ54590, highly similar to KH domain-containing, RNA-binding, signaltransduction-associated protein 1 OS=Homo sapiens PE=2 SV=1;>tr|B2R7B5|B2R7B5_HUMAN cDNA, FLJ93365, highly similar to Homo sapiens KH domain containing, RNA b
Proteasome (Prosome, macropain) 26S subunit, non-ATPase, 13, isoform CRA	PSMD13	42.918	0.575449	-0.572649	-0.204482	-1.3215	-0.191969	53	239360000	80205000	76262000	113730000	36530000	40336000	59455000	24513000	11564000	66168000	19163000	24362000	7	8	7	33	24.2	27.1	26.6	>tr|A0A024R201|A0A024R201_HUMAN Proteasome (Prosome, macropain) 26S subunit, non-ATPase, 13, isoform CRA_a OS=Homo sapiens GN=PSMD13 PE=4 SV=1;>tr|B4DJ66|B4DJ66_HUMAN Proteasome (Prosome, macropain) 26S subunit, non-ATPase, 13, isoform CRA_d OS=Homo sapien
cDNA, FLJ78942, highly similar to Sodium/potassium-transporting ATPase subunit beta-1 OS		28.627	0.573964	0.284944	-0.0305161	0.616075	0.269273	795	60247000	17063000	22051000	22568000	7590300	7340800	19251000	5149200	6976500	18428000	4323000	7733900	2	3	2	17.4	8.9	17.4	8.9	>tr|B7Z9S8|B7Z9S8_HUMAN cDNA, FLJ78942, highly similar to Sodium/potassium-transporting ATPase subunit beta-1 OS=Homo sapiens PE=2 SV=1;>tr|A6NGH2|A6NGH2_HUMAN cDNA FLJ51474, highly similar to Sodium/potassium-transporting ATPase subunit beta-1 OS=Homo sap
Autoantigen La (Fragment) OS	SSB	46.867	0.573642	-0.328723	-0.0465485	-0.752291	-0.187329	202	67863000	24261000	20819000	26419000	10089000	7581400	20164000	7158100	4702800	21280000	7014200	8534900	4	3	4	15	9.3	5.1	9.6	>tr|B5BUB5|B5BUB5_HUMAN Autoantigen La (Fragment) OS=Homo sapiens GN=SSB PE=2 SV=1;>sp|P05455|LA_HUMAN Lupus La protein OS=Homo sapiens GN=SSB PE=1 SV=2;>tr|Q9UMH5|Q9UMH5_HUMAN SS-B/La protein (Fragment) OS=Homo sapiens PE=2 SV=1;>tr|E7ERC4|E7ERC4_HUMAN Lu
Vesicle docking protein p115, isoform CRA	VDP	107.89	0.571881	-0.708091	-0.294172	-1.63823	-0.19187	17	65027000	26078000	19459000	31970000	13653000	8880500	12436000	6571300	2467800	20620000	5853400	8110900	5	4	4	10.7	9.1	7.3	7	>tr|A0A024RDG1|A0A024RDG1_HUMAN Vesicle docking protein p115, isoform CRA_a OS=Homo sapiens GN=VDP PE=4 SV=1;>sp|O60763|USO1_HUMAN General vesicular transport factor p115 OS=Homo sapiens GN=USO1 PE=1 SV=2;>sp|O60763-2|USO1_HUMAN Isoform 2 of General vesicu
3-mercaptopyruvate sulfurtransferase OS	MPST	33.178	0.571484	-0.230486	-0.121173	-0.530427	-0.039859	293	73796000	26598000	21585000	32562000	12200000	7386600	27005000	11107000	7675000	14228000	3290600	6523300	3	3	2	13.5	13.5	13.5	8.1	>sp|P25325|THTM_HUMAN 3-mercaptopyruvate sulfurtransferase OS=Homo sapiens GN=MPST PE=1 SV=3;>sp|P25325-2|THTM_HUMAN Isoform 2 of 3-mercaptopyruvate sulfurtransferase OS=Homo sapiens GN=MPST;>tr|Q2VEU0|Q2VEU0_HUMAN Truncated mercaptopyruvate sulfurtransfer
Isoform 3 of Metaxin-1 OS	MTX1	35.777	0.56654	0.349378	0.107688	0.813607	0.126841	804	130060000	33435000	50090000	51320000	17204000	17213000	49130000	8674900	20857000	29611000	7555700	12020000	4	5	3	21.1	16.7	21.1	12	>sp|Q13505-3|MTX1_HUMAN Isoform 3 of Metaxin-1 OS=Homo sapiens GN=MTX1;>tr|A0A087WZY4|A0A087WZY4_HUMAN Metaxin 1, isoform CRA_b OS=Homo sapiens GN=MTX1 PE=4 SV=1;>sp|Q13505|MTX1_HUMAN Metaxin-1 OS=Homo sapiens GN=MTX1 PE=1 SV=2;>sp|Q13505-2|MTX1_HUMAN Isof
Isoform 2 of Alpha-aminoadipic semialdehyde dehydrogenase OS	ALDH7A1	55.366	0.565548	0.128192	-0.036082	0.250477	0.170181	733	369560000	108350000	131890000	147100000	53842000	46893000	106690000	27181000	39801000	115770000	27325000	45200000	11	11	11	35.8	27.4	31.1	29.5	>sp|P49419-2|AL7A1_HUMAN Isoform 2 of Alpha-aminoadipic semialdehyde dehydrogenase OS=Homo sapiens GN=ALDH7A1;>sp|P49419|AL7A1_HUMAN Alpha-aminoadipic semialdehyde dehydrogenase OS=Homo sapiens GN=ALDH7A1 PE=1 SV=5;>tr|F8VS02|F8VS02_HUMAN Alpha-aminoadipic
tRNA (adenine(58)-N(1))-methyltransferase non-catalytic subunit TRM6 OS	TRMT6	55.799	0.564814	-0.329966	-0.762118	-0.0424865	-0.185294	200	106520000	39818000	30652000	46070000	19299000	10393000	19011000	7686000	5881200	41435000	12833000	14377000	7	5	6	23.9	23.9	13.7	20.3	>sp|Q9UJA5|TRM6_HUMAN tRNA (adenine(58)-N(1))-methyltransferase non-catalytic subunit TRM6 OS=Homo sapiens GN=TRMT6 PE=1 SV=1;>sp|Q9UJA5-4|TRM6_HUMAN Isoform 4 of tRNA (adenine(58)-N(1))-methyltransferase non-catalytic subunit TRM6 OS=Homo sapiens GN=TRMT6
Protein disulfide-isomerase OS		54.102	0.560272	0.100213	-0.00468191	0.225892	0.0794293	717	1951700000	574290000	704450000	743330000	262440000	242600000	609330000	158180000	217610000	599020000	153670000	244240000	15	15	17	53.3	49.6	48.1	53.3	>tr|B3KQT9|B3KQT9_HUMAN Protein disulfide-isomerase OS=Homo sapiens PE=2 SV=1;>tr|V9HVY3|V9HVY3_HUMAN Protein disulfide-isomerase OS=Homo sapiens GN=HEL-S-269 PE=2 SV=1;>sp|P30101|PDIA3_HUMAN Protein disulfide-isomerase A3 OS=Homo sapiens GN=PDIA3 PE=1 SV=
ATP citrate lyase, isoform CRA	ACLY	119.77	0.557197	-0.596495	-0.184425	-1.40297	-0.202091	45	757140000	270980000	229240000	371930000	130040000	107720000	143100000	64956000	32956000	242110000	75990000	88564000	23	16	20	26.8	26.8	18.3	22.3	>tr|A0A024R1Y2|A0A024R1Y2_HUMAN ATP citrate lyase, isoform CRA_a OS=Homo sapiens GN=ACLY PE=4 SV=1;>sp|P53396-2|ACLY_HUMAN Isoform 2 of ATP-citrate synthase OS=Homo sapiens GN=ACLY;>tr|A0A024R1T9|A0A024R1T9_HUMAN ATP citrate lyase, isoform CRA_b OS=Homo sa
Putative uncharacterized protein (Fragment) OS		34.489	0.553817	-0.0499528	-0.0996026	0.0150693	-0.065325	504	294460000	90622000	98862000	167170000	54108000	49679000	60495000	16097000	24353000	66798000	20416000	24831000	5	5	4	25.1	21	20	15.9	>tr|Q8TBT6|Q8TBT6_HUMAN Putative uncharacterized protein (Fragment) OS=Homo sapiens PE=2 SV=1;>sp|P08574|CY1_HUMAN Cytochrome c1, heme protein, mitochondrial OS=Homo sapiens GN=CYC1 PE=1 SV=3
FAST kinase domain-containing protein 5 OS	FASTKD5	86.573	0.549948	-0.182845	-0.264894	0.0632269	-0.346867	331	62326000	22237000	19600000	26218000	12164000	7024800	13756000	4202600	5617900	22352000	5869800	6957700	2	2	2	6.3	4.5	4.5	3.8	>sp|Q7L8L6|FAKD5_HUMAN FAST kinase domain-containing protein 5 OS=Homo sapiens GN=FASTKD5 PE=1 SV=1
Neutral cholesterol ester hydrolase 1 OS	NCEH1	45.807	0.5498	0.259232	0.324119	0.529371	-0.0757937	789	341310000	104280000	125140000	141800000	48358000	46449000	116760000	29863000	44270000	82757000	26058000	34418000	6	6	5	18.4	18.4	18.4	15.2	>sp|Q6PIU2|NCEH1_HUMAN Neutral cholesterol ester hydrolase 1 OS=Homo sapiens GN=NCEH1 PE=1 SV=3;>sp|Q6PIU2-2|NCEH1_HUMAN Isoform 2 of Neutral cholesterol ester hydrolase 1 OS=Homo sapiens GN=NCEH1;>sp|Q6PIU2-3|NCEH1_HUMAN Isoform 3 of Neutral cholesterol e
ATP synthase subunit alpha OS	HEL-S-123m	59.75	0.549264	-0.0630717	-0.145685	-0.044107	0.000576886	484	6648900000	2266600000	2287600000	2897900000	1110600000	925680000	1811100000	613180000	598790000	1939800000	542790000	763090000	18	19	20	47.9	42.1	44.1	45.9	>tr|V9HW26|V9HW26_HUMAN ATP synthase subunit alpha OS=Homo sapiens GN=HEL-S-123m PE=2 SV=1;>sp|P25705|ATPA_HUMAN ATP synthase subunit alpha, mitochondrial OS=Homo sapiens GN=ATP5A1 PE=1 SV=1;>sp|P25705-2|ATPA_HUMAN Isoform 2 of ATP synthase subunit alpha,
DNA-(apurinic or apyrimidinic site) lyase (Fragment) OS	APEX1	29.19	0.549115	-0.508448	-0.237201	-1.20095	-0.0871969	88	430940000	159080000	128720000	168110000	67341000	52590000	118580000	48160000	21550000	144260000	43583000	54575000	7	6	8	39.2	38.8	38.4	39.2	>tr|G3V3M6|G3V3M6_HUMAN DNA-(apurinic or apyrimidinic site) lyase (Fragment) OS=Homo sapiens GN=APEX1 PE=1 SV=1;>tr|Q5TZP7|Q5TZP7_HUMAN APEX nuclease (Multifunctional DNA repair enzyme) 1 OS=Homo sapiens GN=APEX1 PE=2 SV=1;>sp|P27695|APEX1_HUMAN DNA-(apuri
cDNA FLJ76209, highly similar to Homo sapiens inorganic pyrophosphatase 2 (PPA2), transcript variant 2, mRNA OS		31.576	0.548074	-0.175189	-0.0971315	-0.411618	-0.0168185	344	149520000	54201000	46514000	35011000	10938000	8716100	69646000	28913000	19032000	44859000	14350000	18766000	2	3	3	17.5	13.1	14.2	17.5	>tr|A8K0P2|A8K0P2_HUMAN cDNA FLJ76209, highly similar to Homo sapiens inorganic pyrophosphatase 2 (PPA2), transcript variant 2, mRNA OS=Homo sapiens PE=2 SV=1;>sp|Q9H2U2-3|IPYR2_HUMAN Isoform 3 of Inorganic pyrophosphatase 2, mitochondrial OS=Homo sapiens
HCG2005638, isoform CRA	hCG_2005638	48.991	0.547098	-0.267152	-0.268765	-0.585107	0.0524158	264	167600000	56937000	56988000	59776000	25041000	16812000	42425000	14128000	12714000	65402000	17768000	27462000	4	4	6	42.3	37.1	36.2	40.7	>tr|A0A024RCM3|A0A024RCM3_HUMAN HCG2005638, isoform CRA_a OS=Homo sapiens GN=hCG_2005638 PE=4 SV=1;>sp|Q13838|DX39B_HUMAN Spliceosome RNA helicase DDX39B OS=Homo sapiens GN=DDX39B PE=1 SV=1;>sp|Q13838-2|DX39B_HUMAN Isoform 2 of Spliceosome RNA helicase DDX
Mitochondrial carrier homolog 2 OS	MTCH2	33.331	0.542761	0.327113	0.131853	0.780058	0.0694271	800	246260000	61494000	88532000	91359000	29092000	27731000	89177000	16685000	36333000	65723000	15718000	24469000	2	2	2	36	25.4	23.8	31.7	>sp|Q9Y6C9|MTCH2_HUMAN Mitochondrial carrier homolog 2 OS=Homo sapiens GN=MTCH2 PE=1 SV=1;>tr|Q53G34|Q53G34_HUMAN Mitochondrial carrier homolog 2 variant (Fragment) OS=Homo sapiens PE=2 SV=1
Beta-galactosidase OS	GLB1	60.482	0.541684	0.490426	-0.0790512	1.10111	0.449218	826	38017000	10636000	12870000	17554000	6752100	4974100	9922300	1927400	4202100	10541000	1956000	3693900	3	2	2	6.6	6.6	4.8	4.8	>tr|E7EQ29|E7EQ29_HUMAN Beta-galactosidase OS=Homo sapiens GN=GLB1 PE=1 SV=1;>tr|B7Z5H9|B7Z5H9_HUMAN cDNA FLJ53291, highly similar to Beta-galactosidase-related protein OS=Homo sapiens PE=2 SV=1;>sp|P16278-2|BGAL_HUMAN Isoform 2 of Beta-galactosidase OS=Ho
Heat shock 70 kDa protein 4 OS	HSPA4	94.33	0.541629	-0.464609	-0.199404	-1.10805	-0.0863695	115	294750000	107470000	85262000	113400000	42333000	34755000	83558000	32880000	16992000	97793000	32259000	33515000	13	11	16	30	22.7	19.8	28.3	>sp|P34932|HSP74_HUMAN Heat shock 70 kDa protein 4 OS=Homo sapiens GN=HSPA4 PE=1 SV=4;>tr|Q59GF8|Q59GF8_HUMAN Heat shock 70kDa protein 4 isoform a variant (Fragment) OS=Homo sapiens PE=2 SV=1;>tr|B4DH02|B4DH02_HUMAN cDNA FLJ50510, highly similar to Heat sh
DAZ-associated protein 1 (Fragment) OS	DAZAP1	35.02	0.53897	-0.37343	-0.820362	0.0843364	-0.384264	170	52166000	19232000	18069000	17539000	8233100	4207800	16795000	5427600	7411500	17832000	5571300	6450100	2	2	2	9.5	9.5	9.5	9.5	>tr|K7EQ02|K7EQ02_HUMAN DAZ-associated protein 1 (Fragment) OS=Homo sapiens GN=DAZAP1 PE=1 SV=2;>sp|Q96EP5-2|DAZP1_HUMAN Isoform 2 of DAZ-associated protein 1 OS=Homo sapiens GN=DAZAP1;>tr|K7EQ55|K7EQ55_HUMAN DAZ-associated protein 1 OS=Homo sapiens GN=DAZ
SUMO-activating enzyme subunit 1 OS	SAE1	29.422	0.537381	0.0857709	0.105276	-0.0268369	0.178874	699	162090000	49491000	54004000	84756000	28561000	27624000	37449000	9669700	10249000	39885000	11261000	16131000	7	4	5	36.2	36.2	20.8	29.4	>tr|M0QZS6|M0QZS6_HUMAN SUMO-activating enzyme subunit 1 OS=Homo sapiens GN=SAE1 PE=1 SV=1;>tr|A0A024R0R4|A0A024R0R4_HUMAN SUMO-1 activating enzyme subunit 1, isoform CRA_b OS=Homo sapiens GN=SAE1 PE=4 SV=1;>sp|Q9UBE0|SAE1_HUMAN SUMO-activating enzyme subu
Heat shock 105kDa/110kDa protein 1, isoform CRA	HSPH1	92.115	0.534936	-0.378789	0.0728604	-0.851365	-0.357862	168	40087000	13385000	12592000	15262000	5920700	4647200	10991000	3664100	2908800	13834000	3800300	5035600	3	3	4	7.9	5.2	5.2	7.9	>tr|A0A024RDQ0|A0A024RDQ0_HUMAN Heat shock 105kDa/110kDa protein 1, isoform CRA_a OS=Homo sapiens GN=HSPH1 PE=3 SV=1;>sp|Q92598-2|HS105_HUMAN Isoform Beta of Heat shock protein 105 kDa OS=Homo sapiens GN=HSPH1;>sp|Q92598-3|HS105_HUMAN Isoform 3 of Heat sho
cDNA, FLJ93269, highly similar to Homo sapiens mitochondrial ribosomal protein L15 (MRPL15), nuclear gene encoding mitochondrial protein, mRNA OS		33.409	0.532918	-0.16648	-0.259547	0.067501	-0.307394	354	119160000	40372000	41595000	56297000	21506000	17301000	27361000	8877000	10507000	35505000	9988400	13787000	6	4	4	33.1	27.7	17.9	18.2	>tr|B2R739|B2R739_HUMAN cDNA, FLJ93269, highly similar to Homo sapiens mitochondrial ribosomal protein L15 (MRPL15), nuclear gene encoding mitochondrial protein, mRNA OS=Homo sapiens PE=2 SV=1;>sp|Q9P015|RM15_HUMAN 39S ribosomal protein L15, mitochondrial
26S proteasome non-ATPase regulatory subunit 11 OS	PSMD11	47.463	0.532543	-0.486313	-0.112802	-1.1742	-0.171937	99	149970000	50055000	47738000	68104000	22799000	20126000	21326000	8685600	4561200	60543000	18570000	23051000	7	6	7	24.2	19.9	20.6	22.5	>sp|O00231|PSD11_HUMAN 26S proteasome non-ATPase regulatory subunit 11 OS=Homo sapiens GN=PSMD11 PE=1 SV=3;>sp|O00231-2|PSD11_HUMAN Isoform 2 of 26S proteasome non-ATPase regulatory subunit 11 OS=Homo sapiens GN=PSMD11;>tr|B4DTS5|B4DTS5_HUMAN cDNA FLJ58882
Methylenetetrahydrofolate dehydrogenase (NADP+ dependent) 1, methenyltetrahydrofolate cyclohydrolase, formyltetrahydrofolate synthetase, isoform CRA	MTHFD1	101.53	0.531544	-0.607758	-0.313603	-1.45688	-0.0527902	41	302920000	105030000	87190000	106360000	38256000	31381000	79735000	36631000	17980000	116820000	30145000	37829000	12	12	15	23.2	15.3	16.5	19.5	>tr|A0A024R652|A0A024R652_HUMAN Methylenetetrahydrofolate dehydrogenase (NADP+ dependent) 1, methenyltetrahydrofolate cyclohydrolase, formyltetrahydrofolate synthetase, isoform CRA_a OS=Homo sapiens GN=MTHFD1 PE=4 SV=1;>sp|P11586|C1TC_HUMAN C-1-tetrahydrof
Actin-related protein 2/3 complex subunit 3 (Fragment) OS	ARPC3	9.7261	0.52738	-0.106088	-0.0314742	-0.257821	-0.0289697	417	21934000	7263200	7754600	10004000	3378800	4010700	6107600	2060800	1820100	5822800	1823600	1923800	2	2	2	28.6	28.6	28.6	28.6	>tr|F8VR50|F8VR50_HUMAN Actin-related protein 2/3 complex subunit 3 (Fragment) OS=Homo sapiens GN=ARPC3 PE=1 SV=1;>tr|C9JZD1|C9JZD1_HUMAN Actin-related protein 2/3 complex subunit 3 (Fragment) OS=Homo sapiens GN=ARPC3 PE=1 SV=1;>tr|B4DM63|B4DM63_HUMAN Acti
Eukaryotic translation initiation factor 6 OS	EIF6	26.599	0.524156	-0.476727	-0.278041	-1.14481	-0.00733303	102	178890000	70481000	57802000	56058000	19999000	14287000	65231000	40179000	9221900	57597000	10304000	34293000	4	4	5	42.9	26.9	28.6	38.8	>sp|P56537|IF6_HUMAN Eukaryotic translation initiation factor 6 OS=Homo sapiens GN=EIF6 PE=1 SV=1;>sp|P56537-2|IF6_HUMAN Isoform 2 of Eukaryotic translation initiation factor 6 OS=Homo sapiens GN=EIF6;>tr|B7ZBH1|B7ZBH1_HUMAN Eukaryotic translation initiati
Cullin-2 OS	CUL2	82.358	0.522714	-0.405153	-0.129844	-0.989564	-0.0960516	158	22176000	7165700	6795500	8424600	2984400	2671500	4983000	1782600	972780	8768100	2398700	3151300	3	2	2	5.4	5.4	4.2	2.8	>tr|Q5T2B5|Q5T2B5_HUMAN Cullin-2 OS=Homo sapiens GN=CUL2 PE=1 SV=1;>sp|Q13617|CUL2_HUMAN Cullin-2 OS=Homo sapiens GN=CUL2 PE=1 SV=2;>sp|Q13617-2|CUL2_HUMAN Isoform 2 of Cullin-2 OS=Homo sapiens GN=CUL2;>tr|Q5T2B4|Q5T2B4_HUMAN Cullin-2 (Fragment) OS=Homo sa
40S ribosomal protein S6 OS	RPS6	28.708	0.514877	-0.378802	0.0688772	-0.886886	-0.318398	167	141620000	50787000	46215000	58862000	21507000	19573000	36381000	14685000	8962800	46374000	14595000	17679000	2	2	2	9.6	9.6	9.6	9.6	>tr|Q96DV6|Q96DV6_HUMAN 40S ribosomal protein S6 OS=Homo sapiens GN=RPS6 PE=2 SV=1;>tr|A2A3R6|A2A3R6_HUMAN 40S ribosomal protein S6 OS=Homo sapiens GN=RPS6 PE=2 SV=1;>sp|P62753|RS6_HUMAN 40S ribosomal protein S6 OS=Homo sapiens GN=RPS6 PE=1 SV=1;>tr|Q9BZU1
60S ribosomal protein L18 OS	RPL18	15.639	0.51204	-0.655261	-0.0329642	-1.60582	-0.327004	33	312000000	119560000	91720000	106790000	34836000	34247000	104710000	51944000	22722000	100510000	32779000	34751000	3	3	4	30.1	25.6	25.6	30.1	>tr|F8VYV2|F8VYV2_HUMAN 60S ribosomal protein L18 OS=Homo sapiens GN=RPL18 PE=1 SV=1;>tr|B4DDY5|B4DDY5_HUMAN 60S ribosomal protein L18 OS=Homo sapiens PE=2 SV=1;>tr|A0A075B7A0|A0A075B7A0_HUMAN 60S ribosomal protein L18 OS=Homo sapiens GN=RPL18 PE=1 SV=1;>s
Ubiquitin carboxyl-terminal hydrolase OS	UCHL1	15.69	0.510236	-0.611172	0.0643311	-1.46897	-0.428877	39	123860000	43553000	36552000	44329000	15501000	14790000	45794000	17736000	9725800	33738000	10316000	12036000	2	3	2	34.5	22.5	34.5	22.5	>tr|A6NLJ7|A6NLJ7_HUMAN Ubiquitin carboxyl-terminal hydrolase OS=Homo sapiens GN=UCHL1 PE=2 SV=1;>tr|D6RE83|D6RE83_HUMAN Ubiquitin carboxyl-terminal hydrolase OS=Homo sapiens GN=UCHL1 PE=1 SV=1;>tr|V9HW74|V9HW74_HUMAN Ubiquitin carboxyl-terminal hydrolase
Polypyrimidine tract-binding protein 1 OS	PTBP1	57.221	0.509167	-0.262206	-0.56672	0.0990932	-0.318992	268	928690000	337080000	298920000	387240000	165710000	97733000	246670000	77957000	93034000	294780000	93404000	108160000	12	11	8	38	38	33.5	25.6	>sp|P26599|PTBP1_HUMAN Polypyrimidine tract-binding protein 1 OS=Homo sapiens GN=PTBP1 PE=1 SV=1;>sp|P26599-2|PTBP1_HUMAN Isoform 2 of Polypyrimidine tract-binding protein 1 OS=Homo sapiens GN=PTBP1;>sp|P26599-3|PTBP1_HUMAN Isoform 3 of Polypyrimidine trac
cDNA FLJ58466, highly similar to Leucyl-tRNA synthetase, cytoplasmic (EC 6.1.1.4) OS		129.19	0.508971	-0.226641	0.108357	-0.371646	-0.416635	299	26480000	8700600	8712800	10992000	3433800	3576700	5509600	1984800	1813900	9978600	3281900	3322200	4	2	3	5.6	4.6	2.7	3.5	>tr|B4E266|B4E266_HUMAN cDNA FLJ58466, highly similar to Leucyl-tRNA synthetase, cytoplasmic (EC 6.1.1.4) OS=Homo sapiens PE=2 SV=1;>tr|B4DER1|B4DER1_HUMAN cDNA FLJ58157, highly similar to Leucyl-tRNA synthetase, cytoplasmic (EC 6.1.1.4) OS=Homo sapiens PE
NADH dehydrogenase [ubiquinone] 1 beta subcomplex subunit 10 OS	NDUFB10	19.258	0.508742	0.211788	0.194844	0.491904	-0.0513842	773	74779000	23606000	27100000	31148000	10634000	11157000	20214000	5603500	7065500	23417000	7368400	8877100	3	2	2	21.7	21.7	13	13	>tr|H3BPJ9|H3BPJ9_HUMAN NADH dehydrogenase [ubiquinone] 1 beta subcomplex subunit 10 OS=Homo sapiens GN=NDUFB10 PE=1 SV=1;>tr|A8K761|A8K761_HUMAN NADH dehydrogenase (Ubiquinone) 1 beta subcomplex, 10, 22kDa, isoform CRA_b OS=Homo sapiens GN=NDUFB10 PE=2 SV
Isocitrate dehydrogenase [NAD] subunit gamma, mitochondrial OS	IDH3G	42.794	0.502234	-0.0882401	0.0441843	-0.159992	-0.148913	441	120870000	33617000	37405000	39601000	12770000	12518000	41014000	8990100	9707400	40252000	11856000	15179000	6	4	5	30	30	19.1	24.9	>sp|P51553|IDH3G_HUMAN Isocitrate dehydrogenase [NAD] subunit gamma, mitochondrial OS=Homo sapiens GN=IDH3G PE=1 SV=1;>tr|D3DWV9|D3DWV9_HUMAN HCG2004980, isoform CRA_g OS=Homo sapiens GN=IDH3G PE=3 SV=1;>sp|P51553-2|IDH3G_HUMAN Isoform 2 of Isocitrate dehy
L-2-hydroxyglutarate dehydrogenase, mitochondrial OS	L2HGDH	48.475	0.49946	0.266435	-0.136077	0.463832	0.471552	792	62546000	17293000	21670000	29348000	9242800	9065900	10434000	2381600	4087600	22765000	5668200	8516800	2	2	3	8.2	5.4	5.4	8.2	>tr|C9JVN9|C9JVN9_HUMAN L-2-hydroxyglutarate dehydrogenase, mitochondrial OS=Homo sapiens GN=L2HGDH PE=1 SV=1;>sp|Q9H9P8-2|L2HDH_HUMAN Isoform 2 of L-2-hydroxyglutarate dehydrogenase, mitochondrial OS=Homo sapiens GN=L2HGDH;>tr|A8K9B2|A8K9B2_HUMAN cDNA FLJ
60S ribosomal protein L13 OS	RPL13	24.265	0.497597	-0.317621	-0.0368219	-0.796937	-0.119103	216	446010000	153300000	142960000	154100000	52104000	45615000	154520000	62357000	42756000	137390000	38839000	54588000	3	4	3	21.3	14.2	21.3	14.2	>tr|Q6NZ55|Q6NZ55_HUMAN 60S ribosomal protein L13 OS=Homo sapiens GN=RPL13 PE=2 SV=1;>tr|A8K4C8|A8K4C8_HUMAN 60S ribosomal protein L13 OS=Homo sapiens GN=RPL13 PE=2 SV=1;>sp|P26373|RL13_HUMAN 60S ribosomal protein L13 OS=Homo sapiens GN=RPL13 PE=1 SV=4;>tr
cDNA FLJ78120, highly similar to Homo sapiens eukaryotic translation initiation factor 2, subunit 3 gamma, 52kDa (EIF2S3), mRNA OS		51.11	0.497064	-0.385185	-0.0828356	-0.969819	-0.102899	164	188850000	65222000	55870000	65590000	23022000	19380000	57906000	24410000	13256000	65354000	17791000	23233000	5	7	6	20.3	15	20.3	17.2	>tr|A8K2Y2|A8K2Y2_HUMAN cDNA FLJ78120, highly similar to Homo sapiens eukaryotic translation initiation factor 2, subunit 3 gamma, 52kDa (EIF2S3), mRNA OS=Homo sapiens PE=2 SV=1;>tr|A0A024RBY4|A0A024RBY4_HUMAN Eukaryotic translation initiation factor 2, su
Isoform 2 of RNA-binding protein 8A OS	RBM8A	19.76	0.494709	0.331401	-0.120357	0.75369	0.36087	801	105310000	32396000	41210000	45401000	17657000	15075000	31807000	6930400	12904000	28099000	7808700	13231000	3	3	3	32.4	32.4	32.4	32.4	>sp|Q9Y5S9-2|RBM8A_HUMAN Isoform 2 of RNA-binding protein 8A OS=Homo sapiens GN=RBM8A;>tr|A0A023T787|A0A023T787_HUMAN RNA binding motif protein 8A OS=Homo sapiens GN=RBM8 PE=2 SV=1;>sp|Q9Y5S9|RBM8A_HUMAN RNA-binding protein 8A OS=Homo sapiens GN=RBM8A PE=1
Ubiquitin carboxyl-terminal hydrolase OS		117.03	0.492387	-0.319256	-0.657491	0.156008	-0.456286	213	60549000	20983000	20331000	24426000	9671600	6579200	14071000	4366200	5401000	22052000	6944700	8350800	3	6	5	12.3	5	7.9	6.3	>tr|B7Z855|B7Z855_HUMAN Ubiquitin carboxyl-terminal hydrolase OS=Homo sapiens PE=2 SV=1;>sp|Q93009-3|UBP7_HUMAN Isoform 3 of Ubiquitin carboxyl-terminal hydrolase 7 OS=Homo sapiens GN=USP7;>sp|Q93009|UBP7_HUMAN Ubiquitin carboxyl-terminal hydrolase 7 OS=Ho
DnaJ homolog subfamily A member 1 OS	DNAJA1	44.868	0.488284	-0.352359	-0.0911564	-0.896711	-0.0692097	186	99290000	33458000	28801000	41770000	15825000	12803000	25546000	10017000	6201600	31974000	7616300	9797000	4	4	4	23.4	17.1	17.1	18.4	>sp|P31689|DNJA1_HUMAN DnaJ homolog subfamily A member 1 OS=Homo sapiens GN=DNAJA1 PE=1 SV=2;>sp|P31689-2|DNJA1_HUMAN Isoform 2 of DnaJ homolog subfamily A member 1 OS=Homo sapiens GN=DNAJA1;>tr|B7Z5C0|B7Z5C0_HUMAN cDNA FLJ52352, highly similar to DnaJ hom
40S ribosomal protein S3a OS	RPS3A	29.975	0.488045	-0.465516	-0.119667	-1.18505	-0.0918327	114	202530000	75062000	60565000	84505000	29594000	25220000	64259000	30455000	15271000	53765000	15013000	20074000	5	4	4	23.1	23.1	16.3	18.2	>tr|Q6NXR8|Q6NXR8_HUMAN 40S ribosomal protein S3a OS=Homo sapiens GN=RPS3A PE=2 SV=1;>sp|P61247|RS3A_HUMAN 40S ribosomal protein S3a OS=Homo sapiens GN=RPS3A PE=1 SV=2;>tr|B7Z3M5|B7Z3M5_HUMAN 40S ribosomal protein S3a OS=Homo sapiens GN=RPS3A PE=2 SV=1;>tr
28S ribosomal protein S27, mitochondrial OS	MRPS27	41.329	0.485484	-0.0624761	0.00963388	-0.0422191	-0.154843	485	199500000	63046000	73231000	83282000	31700000	26987000	51539000	13705000	21627000	64678000	17642000	24616000	5	5	5	23.2	20.9	20.9	20.1	>tr|G5EA06|G5EA06_HUMAN 28S ribosomal protein S27, mitochondrial OS=Homo sapiens GN=MRPS27 PE=1 SV=1;>tr|A0A024RAJ1|A0A024RAJ1_HUMAN Mitochondrial ribosomal protein S27, isoform CRA_a OS=Homo sapiens GN=MRPS27 PE=4 SV=1;>sp|Q92552|RT27_HUMAN 28S ribosomal
HMOX1 protein OS	HMOX1	32.818	0.484154	0.424437	0.0323829	1.08182	0.159113	814	219370000	62263000	80119000	75794000	32759000	24388000	81537000	15434000	33600000	62034000	14069000	22131000	7	7	6	36.5	36.5	36.5	31.9	>tr|Q6FH11|Q6FH11_HUMAN HMOX1 protein OS=Homo sapiens GN=HMOX1 PE=2 SV=1;>tr|F2YMD9|F2YMD9_HUMAN Heme oxygenase 1 (Fragment) OS=Homo sapiens GN=HMOX1 PE=2 SV=1;>tr|B2R7U4|B2R7U4_HUMAN cDNA, FLJ93605, highly similar to Homo sapiens heme oxygenase (decycling
40S ribosomal protein S14 OS	RPS14	16.273	0.483213	-0.324457	0.0237522	-0.817231	-0.17989	209	133210000	47305000	41589000	66366000	24909000	19854000	42766000	15605000	12745000	24079000	6791600	8989400	4	4	2	31.1	31.1	31.1	17.2	>sp|P62263|RS14_HUMAN 40S ribosomal protein S14 OS=Homo sapiens GN=RPS14 PE=1 SV=3;>tr|H0YB22|H0YB22_HUMAN 40S ribosomal protein S14 (Fragment) OS=Homo sapiens GN=RPS14 PE=1 SV=1;>tr|E5RH77|E5RH77_HUMAN 40S ribosomal protein S14 OS=Homo sapiens GN=RPS14 PE
cDNA FLJ55534, highly similar to 4-trimethylaminobutyraldehyde dehydrogenase (EC 1.2.1.47) OS		52.769	0.481078	-0.119276	-0.288082	-0.104666	0.03492	404	104620000	39871000	30905000	42843000	17688000	13416000	30227000	14566000	6231300	31554000	7616200	11257000	5	4	4	15.9	13.8	11.4	11	>tr|B4DE91|B4DE91_HUMAN cDNA FLJ55534, highly similar to 4-trimethylaminobutyraldehyde dehydrogenase (EC 1.2.1.47) OS=Homo sapiens PE=2 SV=1;>sp|P49189|AL9A1_HUMAN 4-trimethylaminobutyraldehyde dehydrogenase OS=Homo sapiens GN=ALDH9A1 PE=1 SV=3;>sp|P49189-
Malate dehydrogenase (Fragment) OS	MDH2	31.969	0.480924	-0.0471872	-0.00408866	-0.120859	-0.0166141	511	3752800000	1203700000	1322400000	1603700000	559170000	534770000	1060900000	310490000	349160000	1088200000	334040000	438490000	14	13	13	62.3	62.3	58.4	56.7	>tr|Q0QF37|Q0QF37_HUMAN Malate dehydrogenase (Fragment) OS=Homo sapiens GN=MDH2 PE=2 SV=1;>tr|Q75MT9|Q75MT9_HUMAN Malate dehydrogenase (Fragment) OS=Homo sapiens GN=MDH2 PE=3 SV=1;>tr|Q6FHZ0|Q6FHZ0_HUMAN Malate dehydrogenase OS=Homo sapiens GN=MDH2 PE=2 SV
Epididymis luminal protein 33 OS	HEL-S-72p	70.897	0.47919	-0.254114	0.0935602	-0.599375	-0.256528	273	2577800000	862510000	849290000	1026800000	327750000	337030000	729010000	262550000	197990000	821990000	272210000	314270000	14	13	15	46	42.6	38.7	46	>tr|V9HW22|V9HW22_HUMAN Epididymis luminal protein 33 OS=Homo sapiens GN=HEL-S-72p PE=2 SV=1;>sp|P11142|HSP7C_HUMAN Heat shock cognate 71 kDa protein OS=Homo sapiens GN=HSPA8 PE=1 SV=1;>tr|E9PKE3|E9PKE3_HUMAN Heat shock cognate 71 kDa protein OS=Homo sapie
Single-stranded DNA-binding protein OS	SSBP1	17.359	0.47845	-0.154467	0.00345838	-0.394013	-0.0728469	367	573540000	183110000	203960000	217050000	68852000	82968000	171710000	56093000	49210000	184780000	58162000	71783000	6	6	6	50	50	50	50	>tr|Q567R6|Q567R6_HUMAN Single-stranded DNA-binding protein OS=Homo sapiens GN=SSBP1 PE=2 SV=1;>tr|A4D1U3|A4D1U3_HUMAN Single-stranded DNA-binding protein OS=Homo sapiens GN=SSBP1 PE=2 SV=1;>sp|Q04837|SSBP_HUMAN Single-stranded DNA-binding protein, mitocho
Isoform 3 of Apoptosis-inducing factor 1, mitochondrial OS	AIFM1	66.294	0.476915	0.0791303	-0.0358158	0.179511	0.0936954	691	779810000	227820000	291090000	284870000	99617000	91510000	247980000	62478000	94271000	246960000	65727000	105310000	12	11	10	29.7	29.7	27.1	23.6	>sp|O95831-3|AIFM1_HUMAN Isoform 3 of Apoptosis-inducing factor 1, mitochondrial OS=Homo sapiens GN=AIFM1;>sp|O95831|AIFM1_HUMAN Apoptosis-inducing factor 1, mitochondrial OS=Homo sapiens GN=AIFM1 PE=1 SV=1;>sp|O95831-6|AIFM1_HUMAN Isoform 6 of Apoptosis-i
Epididymis secretory protein Li 10 OS	HEL-S-10	22.119	0.472852	-0.695409	-0.159122	-1.80455	-0.122554	22	199150000	70299000	53147000	92953000	25440000	23694000	65128000	36027000	11304000	41071000	8832600	18149000	4	5	3	53.9	28.2	40.3	25.2	>tr|V9HWI1|V9HWI1_HUMAN Epididymis secretory protein Li 10 OS=Homo sapiens GN=HEL-S-10 PE=2 SV=1;>sp|P30043|BLVRB_HUMAN Flavin reductase (NADPH) OS=Homo sapiens GN=BLVRB PE=1 SV=3;>tr|M0R192|M0R192_HUMAN Flavin reductase (NADPH) OS=Homo sapiens GN=BLVRB PE
DNA damage-binding protein 1 OS	DDB1	126.97	0.472692	-0.173955	-0.408187	0.0721745	-0.185852	347	293270000	100640000	96699000	122660000	51592000	35731000	82256000	24339000	27403000	88360000	24704000	33565000	11	11	9	16.2	14.2	13.7	12.2	>sp|Q16531|DDB1_HUMAN DNA damage-binding protein 1 OS=Homo sapiens GN=DDB1 PE=1 SV=1;>tr|F5GY55|F5GY55_HUMAN Uncharacterized protein OS=Homo sapiens GN=DDB1 PE=1 SV=1;>tr|B7Z2A1|B7Z2A1_HUMAN cDNA FLJ56068, highly similar to DNA damage-binding protein 1 OS=
Signal transducer and activator of transcription 1-alpha/beta OS	STAT1	87.334	0.472039	-0.466951	-0.279809	-1.18606	0.0650208	111	66822000	21009000	19554000	24201000	7340200	7611000	20258000	9165700	4395500	22364000	4503100	7547900	5	5	5	11.6	10	8.9	9.5	>sp|P42224|STAT1_HUMAN Signal transducer and activator of transcription 1-alpha/beta OS=Homo sapiens GN=STAT1 PE=1 SV=2;>sp|P42224-2|STAT1_HUMAN Isoform Beta of Signal transducer and activator of transcription 1-alpha/beta OS=Homo sapiens GN=STAT1;>tr|J3KP
Isoform 2 of 28S ribosomal protein S29, mitochondrial OS	DAP3	41.044	0.471699	-0.124533	-0.289563	-0.138537	0.0545011	397	86513000	29570000	26951000	36907000	14806000	10355000	28752000	9280900	9864700	20854000	5482500	6731900	3	4	3	19.6	13.7	14	12.3	>sp|P51398-2|RT29_HUMAN Isoform 2 of 28S ribosomal protein S29, mitochondrial OS=Homo sapiens GN=DAP3;>sp|P51398-3|RT29_HUMAN Isoform 3 of 28S ribosomal protein S29, mitochondrial OS=Homo sapiens GN=DAP3;>sp|P51398|RT29_HUMAN 28S ribosomal protein S29, mit
ADP/ATP translocase 2 OS	SLC25A5	32.852	0.471108	0.068583	0.157949	0.0791561	-0.0313562	679	2433100000	759830000	901830000	1105400000	361300000	386950000	563170000	157630000	205370000	764460000	240910000	309510000	8	7	8	38.6	38.6	38.3	38.6	>sp|P05141|ADT2_HUMAN ADP/ATP translocase 2 OS=Homo sapiens GN=SLC25A5 PE=1 SV=7;>tr|Q6NVC0|Q6NVC0_HUMAN SLC25A5 protein (Fragment) OS=Homo sapiens GN=SLC25A5 PE=2 SV=1
Selenide, water dikinase 1 (Fragment) OS	SEPHS1	18.493	0.466963	-0.275058	-0.17643	-0.69949	0.0507454	257	31699000	11147000	9582600	13667000	5722300	3825800	9327700	3076000	2403100	8703900	2348900	3353700	3	3	3	27.1	27.1	27.1	27.1	>tr|Q5T5U6|Q5T5U6_HUMAN Selenide, water dikinase 1 (Fragment) OS=Homo sapiens GN=SEPHS1 PE=1 SV=1;>sp|P49903-2|SPS1_HUMAN Isoform 2 of Selenide, water dikinase 1 OS=Homo sapiens GN=SEPHS1;>sp|P49903-4|SPS1_HUMAN Isoform 4 of Selenide, water dikinase 1 OS=H
Enoyl-CoA delta isomerase 2, mitochondrial OS	ECI2	15.64	0.466076	0.0904634	0.0227584	0.236707	0.0119249	705	28830000	9061300	10831000	11692000	3938700	3756200	8032900	2394500	3038800	9104600	2728100	4036300	2	2	2	26.4	26.4	26.4	26.4	>tr|F8WAW4|F8WAW4_HUMAN Enoyl-CoA delta isomerase 2, mitochondrial OS=Homo sapiens GN=ECI2 PE=1 SV=1;>tr|Q9NYD2|Q9NYD2_HUMAN Hepatocellular carcinoma-associated antigen 64 OS=Homo sapiens GN=HCA64 PE=2 SV=1;>tr|B4DLL3|B4DLL3_HUMAN cDNA FLJ56683, highly sim
Chromosome 9 open reading frame 88, isoform CRA	C9orf88	82.682	0.464841	-0.465579	0.103934	-1.18	-0.320666	113	187370000	67615000	58690000	79276000	30578000	27162000	56546000	23468000	13676000	51552000	13570000	17853000	6	5	4	12.1	11.2	7.9	7	>tr|A0A024R872|A0A024R872_HUMAN Chromosome 9 open reading frame 88, isoform CRA_a OS=Homo sapiens GN=C9orf88 PE=4 SV=1;>sp|Q96TA1-2|NIBL1_HUMAN Isoform 2 of Niban-like protein 1 OS=Homo sapiens GN=FAM129B;>sp|Q96TA1|NIBL1_HUMAN Niban-like protein 1 OS=Homo
Regulator of chromosome condensation 2, isoform CRA	RCC2	56.084	0.464652	-0.408654	-0.10967	-1.07085	-0.0454463	153	78159000	25309000	25535000	30456000	9933300	10164000	21904000	7533400	4465200	25800000	7842500	10906000	2	2	3	8.6	5.4	5.4	8.6	>tr|A0A024RAC5|A0A024RAC5_HUMAN Regulator of chromosome condensation 2, isoform CRA_a OS=Homo sapiens GN=RCC2 PE=4 SV=1;>sp|Q9P258|RCC2_HUMAN Protein RCC2 OS=Homo sapiens GN=RCC2 PE=1 SV=2;>tr|A5PLK7|A5PLK7_HUMAN RCC2 protein (Fragment) OS=Homo sapiens GN=
Fatty acid synthase OS	FASN	273.42	0.46457	-0.872823	-0.127762	-2.28898	-0.201725	3	270680000	92595000	81830000	130290000	41663000	40261000	39180000	21735000	5463100	101210000	29197000	36105000	16	8	13	10.9	9.5	4.2	7.5	>sp|P49327|FAS_HUMAN Fatty acid synthase OS=Homo sapiens GN=FASN PE=1 SV=3
Inositol 1,4,5-trisphosphate receptor-interacting protein OS	ITPRIP	62.059	0.462876	0.152673	0.012068	0.400647	0.0453032	754	90368000	27919000	32070000	42663000	13258000	14725000	22997000	6398300	7439200	24708000	8262400	9905700	4	4	3	13	11.3	9.1	8.8	>sp|Q8IWB1|IPRI_HUMAN Inositol 1,4,5-trisphosphate receptor-interacting protein OS=Homo sapiens GN=ITPRIP PE=1 SV=1
Insulin-like growth factor 2 mRNA-binding protein 1 OS	IGF2BP1	63.48	0.462423	-0.330006	0.10044	-0.824903	-0.265553	199	84909000	28384000	27043000	36875000	11075000	12541000	27024000	9922600	7427400	21010000	7387100	7074900	6	7	4	17.9	15.1	17.9	11.1	>sp|Q9NZI8|IF2B1_HUMAN Insulin-like growth factor 2 mRNA-binding protein 1 OS=Homo sapiens GN=IGF2BP1 PE=1 SV=2;>tr|D3DTW3|D3DTW3_HUMAN Insulin-like growth factor 2 mRNA binding protein 1, isoform CRA_a OS=Homo sapiens GN=IGF2BP1 PE=4 SV=1;>sp|Q9NZI8-2|IF2
Putative uncharacterized protein tmp	SUCLG1	35.047	0.462117	-0.191633	-0.335863	-0.359786	0.12075	324	88640000	33160000	29943000	54392000	23307000	16146000	10840000	3497300	3733400	23409000	6355700	10063000	4	2	3	21	21	12	16.5	>tr|Q6IAL5|Q6IAL5_HUMAN Putative uncharacterized protein tmp_locus_1 OS=Homo sapiens GN=SUCLG1 PE=2 SV=1;>tr|A8K4W7|A8K4W7_HUMAN cDNA FLJ76284, highly similar to Homo sapiens succinate-CoA ligase, GDP-forming, alpha subunit (SUCLG1), mRNA OS=Homo sapiens P
Microsomal glutathione S-transferase 3 variant (Fragment) OS		16.53	0.461182	0.493582	0.174662	1.29502	0.0110662	827	118890000	28159000	45332000	30798000	10133000	9782300	53133000	8881100	22997000	34958000	9144600	12553000	3	4	4	33.6	32.2	33.6	33.6	>tr|Q53GB9|Q53GB9_HUMAN Microsomal glutathione S-transferase 3 variant (Fragment) OS=Homo sapiens PE=2 SV=1;>tr|A0A024R8Z1|A0A024R8Z1_HUMAN Microsomal glutathione S-transferase 3, isoform CRA_a OS=Homo sapiens GN=MGST3 PE=4 SV=1;>sp|O14880|MGST3_HUMAN Micr
Branched-chain-amino-acid aminotransferase (Fragment) OS		44.273	0.458882	-0.185807	-0.465739	-0.151314	0.0596321	328	84874000	30121000	26537000	49666000	18922000	13704000	13968000	4765100	4407400	21240000	6433500	8425700	4	2	3	12.8	12.8	6.9	9.9	>tr|Q53EW7|Q53EW7_HUMAN Branched-chain-amino-acid aminotransferase (Fragment) OS=Homo sapiens PE=2 SV=1;>sp|O15382|BCAT2_HUMAN Branched-chain-amino-acid aminotransferase, mitochondrial OS=Homo sapiens GN=BCAT2 PE=1 SV=2;>tr|M0QZ10|M0QZ10_HUMAN Branched-cha
Mitotic interactor and substrate of PLK1 OS	MISP	75.356	0.458	-0.232899	-0.374243	0.146394	-0.470849	291	126050000	44674000	39272000	21023000	7244400	5738600	59759000	25340000	15552000	45266000	12090000	17981000	4	6	5	16.2	12.8	16.2	12.2	>sp|Q8IVT2|MISP_HUMAN Mitotic interactor and substrate of PLK1 OS=Homo sapiens GN=MISP PE=1 SV=1
EPHX1 OS	EPHX1	52.948	0.457749	0.159373	0.155102	0.388796	-0.065778	758	3671900000	1140800000	1348900000	1710600000	597640000	599880000	854240000	209740000	319140000	1107000000	333440000	429880000	16	14	14	31.9	31.9	30.3	31.6	>tr|R4SBI6|R4SBI6_HUMAN EPHX1 OS=Homo sapiens GN=EPHX1 PE=2 SV=1;>sp|P07099|HYEP_HUMAN Epoxide hydrolase 1 OS=Homo sapiens GN=EPHX1 PE=1 SV=1;>tr|Q6FGZ3|Q6FGZ3_HUMAN EPHX1 protein (Fragment) OS=Homo sapiens GN=EPHX1 PE=2 SV=1
Aldo-keto reductase family 1 member C2 OS	AKR1C2	33.834	0.457261	-0.550483	-0.317049	-1.42674	0.0923428	66	519030000	193220000	149790000	244150000	106170000	75278000	125800000	52767000	23696000	149080000	34287000	50820000	3	3	3	32.7	32.7	32	26.9	>tr|B4DK69|B4DK69_HUMAN Aldo-keto reductase family 1 member C2 OS=Homo sapiens GN=AKR1C2 PE=2 SV=1;>sp|P52895|AK1C2_HUMAN Aldo-keto reductase family 1 member C2 OS=Homo sapiens GN=AKR1C2 PE=1 SV=3;>tr|S4R3P0|S4R3P0_HUMAN Aldo-keto reductase family 1 member
Isoform 2 of V-type proton ATPase catalytic subunit A OS	ATP6V1A	64.735	0.456097	-0.0485896	-0.124283	-0.0339831	0.0124972	506	114430000	34208000	38871000	30066000	10376000	9831900	38410000	11355000	13047000	45952000	12478000	15993000	4	7	7	17.5	9.1	17.5	17.5	>sp|P38606-2|VATA_HUMAN Isoform 2 of V-type proton ATPase catalytic subunit A OS=Homo sapiens GN=ATP6V1A;>sp|P38606|VATA_HUMAN V-type proton ATPase catalytic subunit A OS=Homo sapiens GN=ATP6V1A PE=1 SV=2;>tr|B7Z2V6|B7Z2V6_HUMAN cDNA FLJ53889, highly simil
Nucleolin, isoform CRA	NCL	58.554	0.455405	-0.272177	0.093425	-0.682974	-0.226983	261	687800000	228190000	220660000	207310000	70100000	67909000	233690000	79644000	62943000	246800000	78446000	89808000	7	8	9	21.3	15.5	17.4	21.3	>tr|B3KM80|B3KM80_HUMAN Nucleolin, isoform CRA_c OS=Homo sapiens GN=NCL PE=2 SV=1;>tr|Q6ZS99|Q6ZS99_HUMAN cDNA FLJ45706 fis, clone FEBRA2028457, highly similar to Nucleolin OS=Homo sapiens PE=2 SV=1;>tr|B3KTP9|B3KTP9_HUMAN cDNA FLJ38578 fis, clone HCHON200
Triosephosphate isomerase OS	HEL-S-49	26.669	0.45282	-0.509611	-0.342195	-1.31348	0.126841	87	1961800000	717950000	589720000	836050000	348510000	266630000	574860000	235160000	114250000	550930000	134280000	208840000	11	12	12	65.1	64.7	65.1	65.1	>tr|V9HWK1|V9HWK1_HUMAN Triosephosphate isomerase OS=Homo sapiens GN=HEL-S-49 PE=2 SV=1;>sp|P60174-1|TPIS_HUMAN Isoform 2 of Triosephosphate isomerase OS=Homo sapiens GN=TPI1;>sp|P60174|TPIS_HUMAN Triosephosphate isomerase OS=Homo sapiens GN=TPI1 PE=1 SV=3
60S ribosomal protein L12 OS	RPL12	17.818	0.452794	-0.420241	0.236217	-0.957776	-0.539163	144	105750000	37794000	32211000	43448000	16224000	14117000	31696000	11852000	7894700	30607000	9718000	10199000	4	3	3	33.9	33.9	24.2	24.2	>sp|P30050|RL12_HUMAN 60S ribosomal protein L12 OS=Homo sapiens GN=RPL12 PE=1 SV=1;>tr|Q59FI9|Q59FI9_HUMAN Ribosomal protein L12 variant (Fragment) OS=Homo sapiens PE=2 SV=1;>tr|D3DS95|D3DS95_HUMAN HCG21173, isoform CRA_a OS=Homo sapiens GN=hCG_21173 PE=4
Epididymis luminal protein 220 OS	HEL-S-70	89.321	0.45086	-0.336435	-0.153703	-0.888408	0.0328061	195	1580500000	524410000	492000000	681840000	245870000	211940000	411370000	152990000	100500000	487290000	125540000	179560000	23	24	23	41.6	35.1	37.1	38.2	>tr|V9HW80|V9HW80_HUMAN Epididymis luminal protein 220 OS=Homo sapiens GN=HEL-S-70 PE=2 SV=1;>sp|P55072|TERA_HUMAN Transitional endoplasmic reticulum ATPase OS=Homo sapiens GN=VCP PE=1 SV=4;>tr|Q96IF9|Q96IF9_HUMAN VCP protein (Fragment) OS=Homo sapiens GN=
Peroxiredoxin-1 OS	PRDX1	22.11	0.449535	-0.596618	-0.489504	-1.51136	0.211012	44	996420000	397940000	266770000	477270000	236610000	125600000	224810000	100600000	43679000	294350000	60722000	97495000	6	4	6	38.2	38.2	33.7	38.2	>sp|Q06830|PRDX1_HUMAN Peroxiredoxin-1 OS=Homo sapiens GN=PRDX1 PE=1 SV=1;>tr|B2R4P2|B2R4P2_HUMAN cDNA, FLJ92164, highly similar to Homo sapiens peroxiredoxin 1 (PRDX1), mRNA OS=Homo sapiens PE=2 SV=1
Pre-B-cell colony enhancing factor 1, isoform CRA	PBEF1	55.52	0.446796	-0.552026	-0.353598	-1.43893	0.136454	64	285270000	101280000	88018000	111600000	47201000	34424000	60968000	24606000	12431000	112700000	29471000	41163000	7	6	9	34	19.6	15.1	25.7	>tr|A0A024R718|A0A024R718_HUMAN Pre-B-cell colony enhancing factor 1, isoform CRA_a OS=Homo sapiens GN=PBEF1 PE=4 SV=1;>sp|P43490|NAMPT_HUMAN Nicotinamide phosphoribosyltransferase OS=Homo sapiens GN=NAMPT PE=1 SV=1;>tr|Q5SYT8|Q5SYT8_HUMAN Protein NAMPTL (
Isoform 2 of ATP-dependent RNA helicase DDX3X OS	DDX3X	71.354	0.445924	-0.349134	-0.130871	-0.932884	0.0163537	190	92509000	43991000	24020000	28137000	9758500	8851900	47071000	29473000	8858300	17301000	4759200	6309700	5	4	5	21.2	8.2	9.6	10.8	>sp|O00571-2|DDX3X_HUMAN Isoform 2 of ATP-dependent RNA helicase DDX3X OS=Homo sapiens GN=DDX3X;>tr|B5BTY4|B5BTY4_HUMAN ATP-dependent RNA helicase DDX3X OS=Homo sapiens GN=DDX3X PE=2 SV=1;>sp|O00571|DDX3X_HUMAN ATP-dependent RNA helicase DDX3X OS=Homo sapi
60S ribosomal protein L27a OS	RPL27A	10.127	0.44514	-0.546188	0.014641	-1.46303	-0.190174	69	542890000	197080000	155010000	209690000	66361000	61668000	191930000	83702000	39183000	141270000	47015000	54157000	2	3	2	37.4	23.1	37.4	23.1	>tr|E9PJD9|E9PJD9_HUMAN 60S ribosomal protein L27a OS=Homo sapiens GN=RPL27A PE=1 SV=1;>tr|Q9BQQ5|Q9BQQ5_HUMAN Ribosomal protein L27a OS=Homo sapiens GN=L27a PE=3 SV=1;>tr|E9PLL6|E9PLL6_HUMAN 60S ribosomal protein L27a OS=Homo sapiens GN=RPL27A PE=1 SV=1;>
Isoform 2 of Eukaryotic translation initiation factor 3 subunit L OS	EIF3L	61.013	0.445075	-0.419807	0.198746	-1.03206	-0.426102	145	80757000	32672000	25752000	33771000	13095000	9991000	24994000	11980000	7085900	21992000	7596800	8675000	6	5	7	22.3	14.9	12	19	>sp|Q9Y262-2|EIF3L_HUMAN Isoform 2 of Eukaryotic translation initiation factor 3 subunit L OS=Homo sapiens GN=EIF3L;>tr|B4DQF6|B4DQF6_HUMAN Eukaryotic translation initiation factor 3 subunit L OS=Homo sapiens GN=EIF3L PE=2 SV=1;>sp|Q9Y262|EIF3L_HUMAN Eukar
Isoform 2 of FAST kinase domain-containing protein 2 OS	FASTKD2	74.535	0.444963	0.218766	-0.126943	0.506805	0.276437	777	29566000	9671700	10464000	13871000	5758300	3830400	10502000	2427200	4850900	5193600	1486300	1782600	3	4	4	9.3	6.6	9.3	9.3	>sp|Q9NYY8-2|FAKD2_HUMAN Isoform 2 of FAST kinase domain-containing protein 2 OS=Homo sapiens GN=FASTKD2;>tr|B3KMB8|B3KMB8_HUMAN cDNA FLJ10654 fis, clone NT2RP2005901, highly similar to FAST kinase domains-containing protein 2 OS=Homo sapiens PE=2 SV=1;>tr
60S ribosomal protein L7a OS	RPL7A	29.995	0.442932	-0.615158	0.147567	-1.6167	-0.376339	38	236940000	86959000	72577000	83193000	27479000	28762000	58958000	29323000	12504000	94787000	30157000	31311000	4	3	5	22.2	19.2	15	22.2	>sp|P62424|RL7A_HUMAN 60S ribosomal protein L7a OS=Homo sapiens GN=RPL7A PE=1 SV=2;>tr|Q5T8U3|Q5T8U3_HUMAN 60S ribosomal protein L7a (Fragment) OS=Homo sapiens GN=RPL7A PE=1 SV=1
cDNA FLJ37398 fis, clone BRAMY2027467, highly similar to Tubulin alpha-ubiquitous chain OS		46.341	0.438062	-0.524061	0.0666747	-1.40851	-0.230347	79	353530000	131290000	113510000	146830000	52969000	50801000	95942000	46689000	22913000	110760000	31627000	39795000	8	7	8	27.4	27.4	24	27.4	>tr|B3KT06|B3KT06_HUMAN cDNA FLJ37398 fis, clone BRAMY2027467, highly similar to Tubulin alpha-ubiquitous chain OS=Homo sapiens PE=2 SV=1;>tr|B3KPS3|B3KPS3_HUMAN cDNA FLJ32131 fis, clone PEBLM2000267, highly similar to Tubulin alpha-ubiquitous chain OS=Hom
cDNA FLJ56274, highly similar to Transketolase (EC 2.2.1.1) OS		62.878	0.437888	-0.481807	-0.236282	-1.28993	0.0807941	100	11148000000	3874100000	3487300000	4823500000	1799000000	1489600000	2849900000	1121900000	553510000	3475100000	953200000	1444200000	20	17	20	56.1	51.6	43.4	55.4	>tr|B4E022|B4E022_HUMAN cDNA FLJ56274, highly similar to Transketolase (EC 2.2.1.1) OS=Homo sapiens PE=1 SV=1;>tr|V9HWD9|V9HWD9_HUMAN Transketolase OS=Homo sapiens GN=HEL107 PE=2 SV=1;>tr|Q53EM5|Q53EM5_HUMAN Transketolase (Fragment) OS=Homo sapiens PE=2 SV
Ribosomal protein L15 (Fragment) OS	RPL15	20.51	0.435723	-1.00879	0.295605	-2.66255	-0.659426	0	238850000	91613000	68909000	79694000	24163000	28480000	68372000	40797000	9757700	90784000	26654000	30671000	2	2	2	13.8	13.8	13.8	13.8	>tr|E7EQV9|E7EQV9_HUMAN Ribosomal protein L15 (Fragment) OS=Homo sapiens GN=RPL15 PE=1 SV=1;>tr|E7ENU7|E7ENU7_HUMAN Ribosomal protein L15 (Fragment) OS=Homo sapiens GN=RPL15 PE=1 SV=1;>tr|A0A024R2Q4|A0A024R2Q4_HUMAN Ribosomal protein L15 OS=Homo sapiens GN
Mitochondrial dicarboxylate carrier OS	SLC25A10	48.099	0.432929	0.0772285	-0.0513095	0.175173	0.107822	690	55299000	18392000	18694000	14067000	5883200	3977100	16745000	4820900	7213400	24486000	7688100	7503700	2	3	3	10.6	5.2	10.6	10.6	>tr|B4DLN1|B4DLN1_HUMAN Mitochondrial dicarboxylate carrier OS=Homo sapiens GN=SLC25A10 PE=1 SV=1;>tr|I3L1E8|I3L1E8_HUMAN Mitochondrial dicarboxylate carrier (Fragment) OS=Homo sapiens GN=SLC25A10 PE=3 SV=1;>tr|B4E1E9|B4E1E9_HUMAN cDNA FLJ61034, highly sim
Ceramide synthase 2 (Fragment) OS	CERS2	36.373	0.431052	0.434433	0.286881	1.15264	-0.13622	816	135880000	35344000	56479000	51268000	16352000	19200000	44494000	7168400	21443000	40114000	11824000	15837000	3	3	2	10.9	10.9	10.9	5.6	>tr|Q5SZE1|Q5SZE1_HUMAN Ceramide synthase 2 (Fragment) OS=Homo sapiens GN=CERS2 PE=1 SV=2;>tr|A8K4M4|A8K4M4_HUMAN cDNA FLJ75329, highly similar to Homo sapiens LAG1 longevity assurance homolog 2 (S. cerevisiae), transcript variant 2, mRNA OS=Homo sapiens P
Acyl-CoA desaturase OS	SCD	41.522	0.429448	-0.0935185	-0.256287	0.00446549	-0.0287342	434	490880000	168100000	177140000	221990000	83861000	80132000	130780000	42811000	46082000	138110000	41429000	50930000	2	2	2	10.6	10.6	10.6	10.6	>sp|O00767|ACOD_HUMAN Acyl-CoA desaturase OS=Homo sapiens GN=SCD PE=1 SV=2;>tr|Q59GX7|Q59GX7_HUMAN Stearoyl-CoA desaturase variant (Fragment) OS=Homo sapiens PE=2 SV=1
Cytoskeleton-associated protein 4, isoform CRA	CKAP4	66.022	0.42938	0.290253	0.358284	0.692874	-0.180397	796	1400800000	410980000	536610000	563160000	170550000	184110000	384360000	96283000	170880000	453250000	144160000	181620000	19	18	17	45.8	43.4	41.7	36.5	>tr|A0A024RBH2|A0A024RBH2_HUMAN Cytoskeleton-associated protein 4, isoform CRA_c OS=Homo sapiens GN=CKAP4 PE=4 SV=1;>sp|Q07065|CKAP4_HUMAN Cytoskeleton-associated protein 4 OS=Homo sapiens GN=CKAP4 PE=1 SV=2;>tr|Q8TB01|Q8TB01_HUMAN Similar to cytoskeleton-
Cytochrome c oxidase subunit 4 isoform 1, mitochondrial OS	COX4I1	19.576	0.428764	0.133109	-0.0730745	0.331361	0.14104	737	142060000	43270000	49693000	58862000	20510000	18227000	41603000	11368000	15558000	41598000	11392000	15908000	4	4	4	26.6	26.6	26.6	26.6	>sp|P13073|COX41_HUMAN Cytochrome c oxidase subunit 4 isoform 1, mitochondrial OS=Homo sapiens GN=COX4I1 PE=1 SV=1;>tr|Q86WV2|Q86WV2_HUMAN COX4I1 protein OS=Homo sapiens GN=COX4I1 PE=1 SV=1;>tr|H3BN72|H3BN72_HUMAN Cytochrome c oxidase subunit 4 isoform 1,
3-beta-hydroxysteroid-Delta(8),Delta(7)-isomerase (Fragment) OS	EBP	16.721	0.423541	0.242968	-0.0947261	0.644502	0.179129	783	94572000	29103000	32270000	41080000	15323000	11909000	21310000	5107900	8628100	32182000	8672200	11733000	2	2	2	17.8	17.8	17.8	17.8	>tr|C9J719|C9J719_HUMAN 3-beta-hydroxysteroid-Delta(8),Delta(7)-isomerase (Fragment) OS=Homo sapiens GN=EBP PE=4 SV=3;>tr|C9JJ78|C9JJ78_HUMAN 3-beta-hydroxysteroid-Delta(8),Delta(7)-isomerase (Fragment) OS=Homo sapiens GN=EBP PE=4 SV=1;>tr|A0A024QYX0|A0A02
cDNA FLJ54047, highly similar to Alpha-1 catenin (Cadherin-associated protein) OS		98.383	0.422615	-0.324364	-0.780587	0.210139	-0.402645	210	126080000	46216000	40950000	44776000	21846000	9897700	46305000	13554000	19697000	35003000	10817000	11356000	8	7	6	26.6	19.4	16.4	15.5	>tr|B4E2G8|B4E2G8_HUMAN cDNA FLJ54047, highly similar to Alpha-1 catenin (Cadherin-associated protein) OS=Homo sapiens PE=2 SV=1;>sp|P35221|CTNA1_HUMAN Catenin alpha-1 OS=Homo sapiens GN=CTNNA1 PE=1 SV=1;>sp|P35221-2|CTNA1_HUMAN Isoform 2 of Catenin alpha-
Tubulin tyrosine ligase-like family, member 12, isoform CRA	TTLL12	74.403	0.422149	-0.673379	0.187261	-1.82767	-0.379733	29	49727000	17677000	15175000	15938000	5053400	5660500	18274000	7277900	3692600	15516000	5346200	5822100	2	3	2	8.9	6.5	8.9	4.8	>tr|A0A024R4U3|A0A024R4U3_HUMAN Tubulin tyrosine ligase-like family, member 12, isoform CRA_a OS=Homo sapiens GN=TTLL12 PE=4 SV=1;>sp|Q14166|TTL12_HUMAN Tubulin--tyrosine ligase-like protein 12 OS=Homo sapiens GN=TTLL12 PE=1 SV=2
Isoform 3 of 1,25-dihydroxyvitamin D(3) 24-hydroxylase, mitochondrial OS	CYP24A1	43.05	0.421156	0.541102	-0.337248	1.32912	0.63143	830	105300000	24615000	46690000	34773000	11545000	7442100	46026000	10392000	27684000	24500000	2677600	11563000	4	5	3	20.4	17.7	20.4	10.2	>sp|Q07973-3|CP24A_HUMAN Isoform 3 of 1,25-dihydroxyvitamin D(3) 24-hydroxylase, mitochondrial OS=Homo sapiens GN=CYP24A1;>sp|Q07973|CP24A_HUMAN 1,25-dihydroxyvitamin D(3) 24-hydroxylase, mitochondrial OS=Homo sapiens GN=CYP24A1 PE=1 SV=2;>sp|Q07973-2|CP24
Sphingosine-1-phosphate lyase 1 OS	SGPL1	63.523	0.41997	0.139637	0.263155	0.266157	-0.110402	746	99425000	29467000	38660000	41556000	12488000	15433000	20331000	4725400	7876600	37539000	12254000	15351000	5	3	6	15.7	9.9	6.2	12	>sp|O95470|SGPL1_HUMAN Sphingosine-1-phosphate lyase 1 OS=Homo sapiens GN=SGPL1 PE=1 SV=3
Heterogeneous nuclear ribonucleoprotein D0 (Fragment) OS	HNRNPD	23.811	0.418144	-0.204492	-0.476639	0.145743	-0.282579	312	221280000	77969000	75159000	87954000	36155000	23744000	66242000	21255000	28048000	67085000	20558000	23366000	3	3	2	31	31	31	17.1	>tr|H0YA96|H0YA96_HUMAN Heterogeneous nuclear ribonucleoprotein D0 (Fragment) OS=Homo sapiens GN=HNRNPD PE=1 SV=1;>tr|D6RAF8|D6RAF8_HUMAN Heterogeneous nuclear ribonucleoprotein D0 (Fragment) OS=Homo sapiens GN=HNRNPD PE=1 SV=1;>tr|H0Y8G5|H0Y8G5_HUMAN Hete
Isoform 2 of Probable ATP-dependent RNA helicase DDX17 OS	DDX17	72.371	0.417681	-0.307226	-0.266229	0.14991	-0.805358	227	118170000	46866000	36373000	53674000	20892000	14053000	20383000	6747400	8608300	44118000	19226000	13712000	7	5	7	20.8	17.7	15.1	17.1	>sp|Q92841-1|DDX17_HUMAN Isoform 2 of Probable ATP-dependent RNA helicase DDX17 OS=Homo sapiens GN=DDX17;>sp|Q92841-3|DDX17_HUMAN Isoform 4 of Probable ATP-dependent RNA helicase DDX17 OS=Homo sapiens GN=DDX17;>sp|Q92841-2|DDX17_HUMAN Isoform 3 of Probable
cDNA FLJ32471 fis, clone SKNMC2000322, highly similar to Peptidyl-tRNA hydrolase 2, mitochondrial (EC 3.1.1.29) OS		19.163	0.415646	0.0962972	0.189034	0.177599	-0.0777413	714	115360000	36762000	41107000	49046000	15745000	16798000	43081000	12746000	16089000	23234000	8270800	8220800	3	4	2	39.7	31.8	39.7	19	>tr|Q96ME4|Q96ME4_HUMAN cDNA FLJ32471 fis, clone SKNMC2000322, highly similar to Peptidyl-tRNA hydrolase 2, mitochondrial (EC 3.1.1.29) OS=Homo sapiens PE=2 SV=2;>sp|Q9Y3E5|PTH2_HUMAN Peptidyl-tRNA hydrolase 2, mitochondrial OS=Homo sapiens GN=PTRH2 PE=1 S
EEF1G protein OS	EEF1G	50.118	0.412251	-0.538315	0.139601	-1.49171	-0.262832	73	590880000	204120000	178380000	233050000	74094000	78640000	187420000	80861000	36171000	170410000	49168000	63568000	10	10	10	27	27	27	27	>tr|Q53YD7|Q53YD7_HUMAN EEF1G protein OS=Homo sapiens GN=EEF1G PE=2 SV=1;>sp|P26641|EF1G_HUMAN Elongation factor 1-gamma OS=Homo sapiens GN=EEF1G PE=1 SV=3;>sp|P26641-2|EF1G_HUMAN Isoform 2 of Elongation factor 1-gamma OS=Homo sapiens GN=EEF1G;>tr|B4DUP0|B
40S ribosomal protein S13 OS	RPS13	17.222	0.412054	-0.349255	0.0486547	-0.978947	-0.117474	189	282870000	98890000	93145000	108870000	39708000	34729000	77370000	30381000	22237000	96627000	28801000	36179000	5	5	5	34.4	34.4	34.4	34.4	>sp|P62277|RS13_HUMAN 40S ribosomal protein S13 OS=Homo sapiens GN=RPS13 PE=1 SV=2;>tr|J3KMX5|J3KMX5_HUMAN 40S ribosomal protein S13 OS=Homo sapiens GN=RPS13 PE=1 SV=1
Signal recognition particle receptor subunit beta (Fragment) OS	SRPRB	17.502	0.410766	0.470424	0.0886844	1.32918	-0.00659373	824	48359000	12713000	19628000	16096000	6257200	5014500	18000000	2648000	9202600	14264000	3807900	5411400	2	2	2	18.1	18.1	18.1	18.1	>tr|H7C4H2|H7C4H2_HUMAN Signal recognition particle receptor subunit beta (Fragment) OS=Homo sapiens GN=SRPRB PE=1 SV=1;>tr|Q549N5|Q549N5_HUMAN Signal recognition particle receptor beta subunit OS=Homo sapiens GN=SRPRB PE=2 SV=1;>sp|Q9Y5M8|SRPRB_HUMAN Sign
Aflatoxin B1 aldehyde reductase member 2 (Fragment) OS	AKR7A2	34.684	0.408615	-0.425668	0.0370308	-1.2036	-0.110433	139	75987000	24353000	24498000	41122000	13116000	13894000	17134000	6299500	3637900	17731000	4936900	6965900	3	3	3	18.5	14.6	13.7	14.6	>tr|H3BLU7|H3BLU7_HUMAN Aflatoxin B1 aldehyde reductase member 2 (Fragment) OS=Homo sapiens GN=AKR7A2 PE=1 SV=1;>tr|V9HWA2|V9HWA2_HUMAN Aldo-keto reductase family 7, member A2 (Aflatoxin aldehyde reductase) OS=Homo sapiens GN=HEL-S-166mP PE=2 SV=1;>sp|O434
Isoform 2 of Prostaglandin reductase 1 OS	PTGR1	32.895	0.40858	-0.471176	-0.201062	-1.31908	0.106616	107	149830000	49616000	43715000	15850000	5249700	5021400	53418000	20098000	9455000	80567000	24268000	29238000	2	5	4	37.2	8.3	32.6	22.3	>sp|Q14914-2|PTGR1_HUMAN Isoform 2 of Prostaglandin reductase 1 OS=Homo sapiens GN=PTGR1;>tr|A0A024R172|A0A024R172_HUMAN Leukotriene B4 12-hydroxydehydrogenase, isoform CRA_a OS=Homo sapiens GN=LTB4DH PE=4 SV=1;>sp|Q14914|PTGR1_HUMAN Prostaglandin reductas
cDNA FLJ12766 fis, clone NT2RP2001520, highly similar to Calcium-binding mitochondrial carrier protein Aralar1 OS		74.777	0.407978	0.170825	-0.140126	0.367259	0.285343	760	105690000	31599000	37307000	41240000	14349000	13065000	23394000	6978200	8998500	41056000	10273000	15243000	5	5	6	16.1	14.2	13.9	16.1	>tr|B3KMV8|B3KMV8_HUMAN cDNA FLJ12766 fis, clone NT2RP2001520, highly similar to Calcium-binding mitochondrial carrier protein Aralar1 OS=Homo sapiens PE=2 SV=1;>sp|O75746|CMC1_HUMAN Calcium-binding mitochondrial carrier protein Aralar1 OS=Homo sapiens GN=
60S ribosomal protein L22 (Fragment) OS	RPL22	5.0827	0.407244	-0.151581	-0.420994	-0.081568	0.0478175	369	433010000	143960000	144150000	176420000	76061000	50140000	130090000	39639000	53932000	126500000	28264000	40075000	2	2	2	51.1	51.1	51.1	51.1	>tr|K7EJT5|K7EJT5_HUMAN 60S ribosomal protein L22 (Fragment) OS=Homo sapiens GN=RPL22 PE=1 SV=1;>tr|K7EP65|K7EP65_HUMAN 60S ribosomal protein L22 (Fragment) OS=Homo sapiens GN=RPL22 PE=1 SV=1;>tr|K7EKS7|K7EKS7_HUMAN 60S ribosomal protein L22 OS=Homo sapien
Isoform 3A of Catenin delta-1 OS	CTNND1	92.674	0.404501	-0.474276	-1.2285	0.296193	-0.490517	106	87485000	32953000	27818000	35191000	15272000	8345200	22981000	7217900	9823900	29313000	10464000	9648900	5	7	7	19.7	8.7	13.3	12.1	>sp|O60716-21|CTND1_HUMAN Isoform 3A of Catenin delta-1 OS=Homo sapiens GN=CTNND1;>sp|O60716-19|CTND1_HUMAN Isoform 3AC of Catenin delta-1 OS=Homo sapiens GN=CTNND1;>sp|O60716-18|CTND1_HUMAN Isoform 3AB of Catenin delta-1 OS=Homo sapiens GN=CTNND1;>sp|O607
Poly(rC)-binding protein 2 (Fragment) OS	PCBP2	16.637	0.402496	-0.300509	-0.132704	-0.84757	0.0787465	231	78679000	26595000	25770000	34887000	13182000	11212000	17965000	7154700	4575900	25828000	6258100	9982300	3	2	3	56.3	56.3	41.8	56.3	>tr|F8W0G4|F8W0G4_HUMAN Poly(rC)-binding protein 2 (Fragment) OS=Homo sapiens GN=PCBP2 PE=1 SV=1;>tr|F8VXH9|F8VXH9_HUMAN Poly(rC)-binding protein 2 (Fragment) OS=Homo sapiens GN=PCBP2 PE=1 SV=1;>tr|B4DRD7|B4DRD7_HUMAN cDNA FLJ54752, highly similar to Poly(
Epididymis luminal protein 60 OS	HEL60	98.398	0.401529	-0.349447	-0.229382	-0.965615	0.146655	188	238780000	82906000	74832000	114530000	48005000	35544000	47577000	18727000	11427000	76666000	16175000	27861000	10	7	9	21.1	17.8	13.2	16.6	>tr|V9HWB7|V9HWB7_HUMAN Epididymis luminal protein 60 OS=Homo sapiens GN=HEL60 PE=2 SV=1;>sp|P21399|ACOC_HUMAN Cytoplasmic aconitate hydratase OS=Homo sapiens GN=ACO1 PE=1 SV=3;>tr|Q9HBB2|Q9HBB2_HUMAN Iron regulatory protein 1 OS=Homo sapiens GN=IRP1 PE=1
Heterogeneous nuclear ribonucleoprotein H OS	HNRNPH1	47.087	0.401225	-0.364068	-0.831974	0.298541	-0.558772	178	210040000	78841000	66911000	104620000	44089000	26184000	59684000	17532000	25404000	45732000	17220000	15323000	4	3	2	32.2	32.2	27.7	24.5	>tr|E9PCY7|E9PCY7_HUMAN Heterogeneous nuclear ribonucleoprotein H OS=Homo sapiens GN=HNRNPH1 PE=1 SV=1;>sp|P31943|HNRH1_HUMAN Heterogeneous nuclear ribonucleoprotein H OS=Homo sapiens GN=HNRNPH1 PE=1 SV=4;>tr|G8JLB6|G8JLB6_HUMAN Heterogeneous nuclear ribon
Isoform 2 of Surfeit locus protein 4 OS	SURF4	17.97	0.400661	0.0941102	0.0813396	0.252779	-0.0517879	711	525180000	158030000	194360000	207960000	67860000	71299000	116500000	30655000	47189000	200720000	59517000	75874000	3	2	3	22.6	22.6	17.6	22.6	>sp|O15260-2|SURF4_HUMAN Isoform 2 of Surfeit locus protein 4 OS=Homo sapiens GN=SURF4;>tr|Q5T8U5|Q5T8U5_HUMAN Surfeit 4 OS=Homo sapiens GN=SURF4 PE=1 SV=1;>tr|Q5T8U7|Q5T8U7_HUMAN Surfeit 4 OS=Homo sapiens GN=SURF4 PE=4 SV=1;>sp|O15260|SURF4_HUMAN Surfeit
Sterol-4-alpha-carboxylate 3-dehydrogenase, decarboxylating OS	NSDHL	41.9	0.398765	-0.023329	-0.0126354	-0.0655514	0.0082	561	178360000	58821000	62642000	79552000	30865000	24584000	41121000	12516000	14068000	57691000	15440000	23991000	6	6	6	29	26	24.9	26	>sp|Q15738|NSDHL_HUMAN Sterol-4-alpha-carboxylate 3-dehydrogenase, decarboxylating OS=Homo sapiens GN=NSDHL PE=1 SV=2;>tr|C9JDR0|C9JDR0_HUMAN Sterol-4-alpha-carboxylate 3-dehydrogenase, decarboxylating (Fragment) OS=Homo sapiens GN=NSDHL PE=1 SV=1
Dihydropyrimidinase-like 2 OS		67.017	0.398506	-0.595107	0.0882773	-1.70595	-0.167653	46	70911000	24912000	25220000	32491000	10002000	12219000	14829000	7292700	3324600	23592000	7617800	9676300	6	4	4	18.6	16	12.6	9.2	>tr|Q86U75|Q86U75_HUMAN Dihydropyrimidinase-like 2 OS=Homo sapiens PE=2 SV=1;>sp|Q9HCN8|SDF2L_HUMAN Stromal cell-derived factor 2-like protein 1 OS=Homo sapiens GN=SDF2L1 PE=1 SV=2
Isoform 3 of Prolyl 4-hydroxylase subunit alpha-1 OS	P4HA1	58.957	0.396979	0.206986	0.208767	0.544881	-0.132689	770	319840000	135680000	137670000	148340000	17997000	109550000	37471000	16879000	9312500	134030000	100810000	18805000	6	4	6	17.1	15.1	9.7	14.3	>sp|P13674-3|P4HA1_HUMAN Isoform 3 of Prolyl 4-hydroxylase subunit alpha-1 OS=Homo sapiens GN=P4HA1;>tr|Q5VSQ6|Q5VSQ6_HUMAN Procollagen-proline, 2-oxoglutarate 4-dioxygenase (Proline 4-hydroxylase), alpha polypeptide I variant (Fragment) OS=Homo sapiens GN
FWP004 OS		23.662	0.396694	-0.454285	0.188907	-1.2692	-0.282562	123	321740000	113200000	108730000	139270000	40988000	53200000	82270000	36108000	18665000	100200000	36108000	36869000	4	4	5	25.1	20.2	20.2	25.1	>tr|Q5QTS3|Q5QTS3_HUMAN FWP004 OS=Homo sapiens PE=2 SV=1;>sp|P40429|RL13A_HUMAN 60S ribosomal protein L13a OS=Homo sapiens GN=RPL13A PE=1 SV=2;>tr|Q8J015|Q8J015_HUMAN 60S ribosomal protein L13a OS=Homo sapiens GN=RPL13a PE=2 SV=1;>tr|Q9BSQ6|Q9BSQ6_HUMAN RP
Probable ATP-dependent RNA helicase DDX5 OS	DDX5	69.086	0.396247	-0.396791	-0.939123	0.32458	-0.57583	161	667580000	249810000	219720000	237010000	102340000	65147000	171930000	54711000	75213000	258630000	92763000	79361000	12	11	12	31.9	26.9	26.5	26.4	>tr|J3KTA4|J3KTA4_HUMAN Probable ATP-dependent RNA helicase DDX5 OS=Homo sapiens GN=DDX5 PE=1 SV=1;>tr|B5BUE6|B5BUE6_HUMAN ATP-dependent RNA helicase DDX5 (Fragment) OS=Homo sapiens GN=DDX5 PE=2 SV=1;>sp|P17844|DDX5_HUMAN Probable ATP-dependent RNA helicas
Retinal cone rhodopsin-sensitive cGMP 3,5-cyclic phosphodiesterase subunit gamma OS	PDE6H	16.29	0.395788	-0.367926	0.0762854	-1.05559	-0.124472	175	334720000	112350000	107940000	143260000	49829000	48295000	72280000	26157000	16705000	119180000	36368000	42938000	7	6	7	48.3	48.3	42.8	48.3	>tr|F8W1R7|F8W1R7_HUMAN Retinal cone rhodopsin-sensitive cGMP 3,5-cyclic phosphodiesterase subunit gamma OS=Homo sapiens GN=PDE6H PE=4 SV=1;>sp|P60660-2|MYL6_HUMAN Isoform Smooth muscle of Myosin light polypeptide 6 OS=Homo sapiens GN=MYL6;>sp|P60660|MYL
Ras-related protein Rab-10 OS	RAB10	22.541	0.394926	-0.135372	-0.286392	0.120352	-0.240077	386	114020000	34637000	40383000	31592000	11910000	9556000	49801000	13264000	19036000	32625000	9463300	11791000	2	4	3	34.5	26	34.5	29.5	>sp|P61026|RAB10_HUMAN Ras-related protein Rab-10 OS=Homo sapiens GN=RAB10 PE=1 SV=1;>tr|Q53T70|Q53T70_HUMAN Putative uncharacterized protein RAB10 (Fragment) OS=Homo sapiens GN=RAB10 PE=3 SV=1
GPI-anchor transamidase OS	PIGK	34.313	0.393315	0.0877259	0.138159	0.20063	-0.0756113	702	73630000	24052000	26412000	26987000	8687400	9382700	18991000	6571200	6418500	27652000	8793900	10611000	3	4	4	14	10	14	14	>tr|B1AK81|B1AK81_HUMAN GPI-anchor transamidase OS=Homo sapiens GN=PIGK PE=1 SV=1;>sp|Q92643-2|GPI8_HUMAN Isoform 2 of GPI-anchor transamidase OS=Homo sapiens GN=PIGK;>sp|Q92643|GPI8_HUMAN GPI-anchor transamidase OS=Homo sapiens GN=PIGK PE=1 SV=2;>tr|A6NEM
NADH-cytochrome b5 reductase 1 (Fragment) OS	CYB5R1	24.793	0.392875	0.0426762	0.0919367	0.0742315	-0.0381397	649	59355000	18313000	20209000	21575000	7506300	7001300	20655000	5893900	7077700	17125000	4913300	6129700	2	3	2	12.4	8.4	12.4	7.5	>tr|H7C0R7|H7C0R7_HUMAN NADH-cytochrome b5 reductase 1 (Fragment) OS=Homo sapiens GN=CYB5R1 PE=1 SV=1;>sp|Q9UHQ9|NB5R1_HUMAN NADH-cytochrome b5 reductase 1 OS=Homo sapiens GN=CYB5R1 PE=1 SV=1
Isoform 2 of Band 4.1-like protein 1 OS	EPB41L1	87.644	0.391386	-0.364712	-0.860164	0.309642	-0.543614	177	39482000	13816000	13082000	17843000	7327200	5039700	11876000	3492200	4696000	9763000	2996600	3346000	3	3	3	6.5	5	4.9	4.9	>sp|Q9H4G0-2|E41L1_HUMAN Isoform 2 of Band 4.1-like protein 1 OS=Homo sapiens GN=EPB41L1;>tr|B7Z653|B7Z653_HUMAN cDNA FLJ61657, highly similar to Band 4.1-like protein 1 OS=Homo sapiens PE=2 SV=1;>sp|Q9H4G0-4|E41L1_HUMAN Isoform 4 of Band 4.1-like protein
Far upstream element-binding protein 2 OS	KHSRP	73.114	0.389518	-0.542373	-1.45064	0.357158	-0.533639	71	91102000	36001000	30687000	24181000	12889000	4005200	35474000	11412000	17783000	31447000	11701000	8899100	5	8	7	24.9	15.5	23.1	19.4	>sp|Q92945|FUBP2_HUMAN Far upstream element-binding protein 2 OS=Homo sapiens GN=KHSRP PE=1 SV=4;>tr|A0A087WTP3|A0A087WTP3_HUMAN Far upstream element-binding protein 2 OS=Homo sapiens GN=KHSRP PE=4 SV=1;>tr|B4DV73|B4DV73_HUMAN cDNA FLJ51330, highly similar
NHP2 non-histone chromosome protein 2-like 1 (S. cerevisiae) OS	NHP2L1	14.173	0.388468	-0.0862331	0.0304067	-0.247303	-0.0418032	448	117380000	36863000	42815000	70232000	23425000	25060000	21611000	6047600	7950100	25537000	7389800	9804800	3	2	2	33.6	24.2	18.8	15.6	>tr|Q6FHM6|Q6FHM6_HUMAN NHP2 non-histone chromosome protein 2-like 1 (S. cerevisiae) OS=Homo sapiens GN=NHP2L1 PE=2 SV=1;>sp|P55769|NH2L1_HUMAN NHP2-like protein 1 OS=Homo sapiens GN=NHP2L1 PE=1 SV=3;>tr|B1AHD1|B1AHD1_HUMAN NHP2-like protein 1 OS=Homo sapi
Isoform 2 of NADH dehydrogenase [ubiquinone] iron-sulfur protein 2, mitochondrial OS	NDUFS2	51.851	0.388366	-0.107086	-0.274023	0.081885	-0.129118	415	263300000	86475000	91520000	128410000	49249000	39508000	40696000	12459000	15471000	94196000	24768000	36541000	9	6	10	37	29.5	18.8	34.6	>sp|O75306-2|NDUS2_HUMAN Isoform 2 of NADH dehydrogenase [ubiquinone] iron-sulfur protein 2, mitochondrial OS=Homo sapiens GN=NDUFS2;>tr|Q53HG2|Q53HG2_HUMAN NADH dehydrogenase (Ubiquinone) Fe-S protein 2, 49kDa (NADH-coenzyme Q reductase) variant (Fragment
NAD(P)H dehydrogenase [quinone] 1 OS	NQO1	22.793	0.387521	-0.498573	-0.0556213	-1.46172	0.0216219	93	818710000	297030000	245190000	341750000	147770000	109980000	201080000	89087000	43038000	275880000	60177000	92177000	7	7	8	40.1	30.2	30.2	40.1	>tr|B4DLR8|B4DLR8_HUMAN NAD(P)H dehydrogenase [quinone] 1 OS=Homo sapiens GN=NQO1 PE=1 SV=1;>sp|P15559-3|NQO1_HUMAN Isoform 3 of NAD(P)H dehydrogenase [quinone] 1 OS=Homo sapiens GN=NQO1;>tr|Q3B792|Q3B792_HUMAN NQO1 protein (Fragment) OS=Homo sapiens GN=NQ
cDNA FLJ55931, highly similar to Isocitrate dehydrogenase OS		34.505	0.38691	-0.110854	-0.234329	-0.201228	0.102994	411	608760000	199990000	209620000	276330000	100660000	86869000	151040000	48738000	47511000	181390000	50598000	75244000	7	5	8	32.6	24.7	16.5	32.3	>tr|B4DJB4|B4DJB4_HUMAN cDNA FLJ55931, highly similar to Isocitrate dehydrogenase OS=Homo sapiens PE=2 SV=1;>tr|Q53GF8|Q53GF8_HUMAN Isocitrate dehydrogenase 3 (NAD+) alpha variant (Fragment) OS=Homo sapiens PE=2 SV=1;>sp|P50213|IDH3A_HUMAN Isocitrate dehyd
Putative uncharacterized protein DKFZp686P17171 OS	DKFZp686P17171	42.44	0.386083	-0.697839	-0.369296	-1.99994	0.275722	20	14569000	5192400	3988300	3373000	1246900	928750	4971400	2780100	876340	6224900	1165400	2183200	2	2	2	3.1	3.1	3.1	3.1	>tr|Q63HR1|Q63HR1_HUMAN Putative uncharacterized protein DKFZp686P17171 OS=Homo sapiens GN=DKFZp686P17171 PE=2 SV=1;>tr|Q5VU21|Q5VU21_HUMAN PAI-1 mRNA-binding protein variant OS=Homo sapiens PE=2 SV=1;>sp|Q8NC51-4|PAIRB_HUMAN Isoform 4 of Plasminogen activ
39S ribosomal protein L38, mitochondrial OS	MRPL38	44.596	0.385021	-0.182908	-0.535875	-0.0459377	0.0330882	330	60291000	20552000	19676000	23027000	9058800	6378500	20354000	7353700	6526300	16910000	4139400	6771100	4	4	4	15.3	12.6	14.5	12.6	>sp|Q96DV4|RM38_HUMAN 39S ribosomal protein L38, mitochondrial OS=Homo sapiens GN=MRPL38 PE=1 SV=2;>tr|B2R894|B2R894_HUMAN Mitochondrial ribosomal protein L38, isoform CRA_b OS=Homo sapiens GN=MRPL38 PE=2 SV=1
KIAA0118 protein (Fragment) OS		19.348	0.383169	-0.139584	-0.132625	-0.379282	0.0931545	383	17741000	5917700	5734300	7635100	2898300	1925000	4907300	1568400	1629200	5198900	1451100	2180000	2	2	2	17.1	17.1	17.1	17.1	>tr|Q96GX3|Q96GX3_HUMAN KIAA0118 protein (Fragment) OS=Homo sapiens PE=2 SV=1;>tr|A0A024RBA9|A0A024RBA9_HUMAN RAB21, member RAS oncogene family, isoform CRA_a OS=Homo sapiens GN=RAB21 PE=3 SV=1;>sp|Q9UL25|RAB21_HUMAN Ras-related protein Rab-21 OS=Homo sapi
cDNA FLJ54020, highly similar to Heterogeneous nuclear ribonucleoprotein U OS		86.86	0.381521	-0.503307	-1.10392	0.476226	-0.882225	91	1774600000	710370000	528120000	817450000	390450000	167760000	466480000	148310000	228780000	490630000	171610000	131580000	16	16	15	27.4	25.9	24.5	22.6	>tr|B4DLR3|B4DLR3_HUMAN cDNA FLJ54020, highly similar to Heterogeneous nuclear ribonucleoprotein U OS=Homo sapiens PE=2 SV=1;>sp|Q00839-2|HNRPU_HUMAN Isoform Short of Heterogeneous nuclear ribonucleoprotein U OS=Homo sapiens GN=HNRNPU;>sp|Q00839|HNRPU_HUMA
Protein S100-A4 OS	S100A4	11.728	0.381478	-0.535158	0.388796	-1.43	-0.564265	75	130170000	44971000	39607000	58609000	17811000	20798000	38760000	15841000	6913400	32799000	11319000	11895000	2	2	2	18.8	18.8	18.8	18.8	>sp|P26447|S10A4_HUMAN Protein S100-A4 OS=Homo sapiens GN=S100A4 PE=1 SV=1
28S ribosomal protein S7, mitochondrial (Fragment) OS	MRPS7	19.903	0.380854	-0.12276	-0.352363	0.0564447	-0.0723614	400	95412000	32450000	31662000	53579000	20722000	15207000	15715000	4525300	6313900	26118000	7202400	10141000	4	3	4	34.3	26.7	19.8	27.3	>tr|J3QQS1|J3QQS1_HUMAN 28S ribosomal protein S7, mitochondrial (Fragment) OS=Homo sapiens GN=MRPS7 PE=1 SV=1;>tr|A0A024R8L0|A0A024R8L0_HUMAN Mitochondrial ribosomal protein S7, isoform CRA_a OS=Homo sapiens GN=MRPS7 PE=4 SV=1;>sp|Q9Y2R9|RT07_HUMAN 28S rib
40S ribosomal protein S8 OS	RPS8	21.879	0.377889	-0.516218	0.298072	-1.45882	-0.387902	83	306580000	117580000	92917000	128540000	46513000	40713000	82786000	39800000	17348000	95250000	31262000	34856000	4	3	4	24.5	24.5	20.7	24.5	>tr|Q5JR95|Q5JR95_HUMAN 40S ribosomal protein S8 OS=Homo sapiens GN=RPS8 PE=1 SV=1;>tr|Q5JR94|Q5JR94_HUMAN 40S ribosomal protein S8 OS=Homo sapiens GN=RPS8 PE=2 SV=1;>sp|P62241|RS8_HUMAN 40S ribosomal protein S8 OS=Homo sapiens GN=RPS8 PE=1 SV=2;>tr|Q9BS10
Isoform 2 of Coiled-coil domain-containing protein 47 OS	CCDC47	55.317	0.375256	0.213607	-0.192711	0.527271	0.306262	775	68252000	18760000	25145000	16885000	6224000	5300600	25419000	5622900	10452000	25948000	6913400	9392300	2	3	4	12.1	5.6	9.6	12.1	>sp|Q96A33-2|CCD47_HUMAN Isoform 2 of Coiled-coil domain-containing protein 47 OS=Homo sapiens GN=CCDC47;>sp|Q96A33|CCD47_HUMAN Coiled-coil domain-containing protein 47 OS=Homo sapiens GN=CCDC47 PE=1 SV=1
X-ray repair cross-complementing protein 5 OS	XRCC5	82.704	0.373206	-0.188857	-0.402607	-0.352492	0.188528	325	1993400000	667930000	654300000	856980000	342010000	241170000	514240000	167110000	169340000	622160000	158810000	243790000	19	20	19	33.3	31	30.2	30.2	>sp|P13010|XRCC5_HUMAN X-ray repair cross-complementing protein 5 OS=Homo sapiens GN=XRCC5 PE=1 SV=3;>tr|Q53T09|Q53T09_HUMAN Putative uncharacterized protein XRCC5 (Fragment) OS=Homo sapiens GN=XRCC5 PE=4 SV=1
Tubulin, beta 2C OS	TUBB2C	49.807	0.3722	-0.519572	0.227864	-1.52446	-0.262123	82	48280000	18102000	14468000	19158000	6574400	5866100	15021000	7626900	3581200	14102000	3900600	5020400	2	2	2	34.8	34.8	21.3	23.1	>tr|Q8N6N5|Q8N6N5_HUMAN Tubulin, beta 2C OS=Homo sapiens GN=TUBB2C PE=2 SV=1;>tr|Q8IZ29|Q8IZ29_HUMAN Tubulin, beta 2C OS=Homo sapiens GN=TUBB2C PE=2 SV=1;>tr|Q8IWP6|Q8IWP6_HUMAN Class IVb beta tubulin OS=Homo sapiens PE=2 SV=1;>sp|P68371|TBB4B_HUMAN Tubuli
Isoform 2 of Nuclear RNA export factor 1 OS	NXF1	40.475	0.371849	-0.141975	-0.0282928	-0.425637	0.0280033	381	47323000	13251000	16755000	23609000	7130800	7706100	8982300	2710300	3075700	14732000	3409900	5972900	3	2	3	18.5	13.5	9.3	14.3	>sp|Q9UBU9-2|NXF1_HUMAN Isoform 2 of Nuclear RNA export factor 1 OS=Homo sapiens GN=NXF1;>tr|Q59E96|Q59E96_HUMAN Nuclear RNA export factor 1 variant (Fragment) OS=Homo sapiens PE=2 SV=1;>tr|E9PIN3|E9PIN3_HUMAN Nuclear RNA export factor 1 (Fragment) OS=Homo
Coatomer subunit alpha OS	COPA	138.34	0.371378	-0.638676	0.11063	-1.91839	-0.10827	35	264720000	94557000	90268000	135030000	50032000	47256000	41775000	19869000	10033000	87908000	24657000	32979000	12	7	9	12.3	12.3	8	9.3	>sp|P53621|COPA_HUMAN Coatomer subunit alpha OS=Homo sapiens GN=COPA PE=1 SV=2;>sp|P53621-2|COPA_HUMAN Isoform 2 of Coatomer subunit alpha OS=Homo sapiens GN=COPA
Isoform 3 of Heterogeneous nuclear ribonucleoprotein D-like OS	HNRNPDL	27.191	0.371375	-0.274485	-0.534558	0.277866	-0.566763	258	81780000	29071000	24999000	30021000	13453000	6294500	23933000	6138500	10235000	27826000	9479800	8469300	2	2	2	18.9	18.9	18.9	15.6	>sp|O14979-3|HNRDL_HUMAN Isoform 3 of Heterogeneous nuclear ribonucleoprotein D-like OS=Homo sapiens GN=HNRNPDL;>tr|B4DTA2|B4DTA2_HUMAN cDNA FLJ60148, highly similar to Homo sapiens heterogeneous nuclear ribonucleoprotein D-like (HNRPDL), transcript varian
Isoform 2 of Nucleolar RNA helicase 2 OS	DDX21	79.656	0.370413	-0.462003	-0.869306	0.468114	-0.984817	118	171050000	70623000	53692000	74653000	37417000	14521000	44115000	12592000	21136000	52278000	20615000	18035000	7	7	5	15	12.3	11.9	8.8	>sp|Q9NR30-2|DDX21_HUMAN Isoform 2 of Nucleolar RNA helicase 2 OS=Homo sapiens GN=DDX21;>sp|Q9NR30|DDX21_HUMAN Nucleolar RNA helicase 2 OS=Homo sapiens GN=DDX21 PE=1 SV=5
cDNA, FLJ92537, highly similar to Homo sapiens procollagen-lysine, 2-oxoglutarate 5-dioxygenase (lysine hydroxylase, Ehlers-Danlos syndrome type VI) (PLOD), mRNA OS		83.503	0.36925	-0.179427	0.167872	-0.26093	-0.445225	336	153910000	57772000	46341000	68166000	21153000	20271000	33767000	17841000	6635100	51982000	18778000	19435000	4	5	5	13.1	7.8	9.9	9.4	>tr|B2R5M9|B2R5M9_HUMAN cDNA, FLJ92537, highly similar to Homo sapiens procollagen-lysine, 2-oxoglutarate 5-dioxygenase (lysine hydroxylase, Ehlers-Danlos syndrome type VI) (PLOD), mRNA OS=Homo sapiens PE=2 SV=1;>tr|A0A024R4H0|A0A024R4H0_HUMAN Procollagen-
Annexin OS	ANXA4	33.552	0.368932	-0.212214	-0.378082	-0.472809	0.214249	306	62191000	21984000	19171000	24826000	9801700	8291300	28100000	10478000	7980400	9265200	1704300	2899200	3	5	4	20.7	11.4	20.7	15.4	>tr|Q6P452|Q6P452_HUMAN Annexin OS=Homo sapiens GN=ANXA4 PE=1 SV=1;>tr|B4DE02|B4DE02_HUMAN Annexin OS=Homo sapiens PE=2 SV=1;>sp|P09525|ANXA4_HUMAN Annexin A4 OS=Homo sapiens GN=ANXA4 PE=1 SV=4;>tr|V9HW59|V9HW59_HUMAN Annexin OS=Homo sapiens GN=HEL-S-274 P
NADH dehydrogenase (Ubiquinone) 1 beta subcomplex, 1, 7kDa, isoform CRA	NDUFB1	6.9611	0.368817	0.400743	0.0384361	1.21139	-0.0475919	810	109360000	34401000	39439000	65566000	21289000	22974000	25790000	6900000	9992700	18005000	6212600	6472500	2	2	2	20.7	20.7	20.7	20.7	>tr|A0A024R6G6|A0A024R6G6_HUMAN NADH dehydrogenase (Ubiquinone) 1 beta subcomplex, 1, 7kDa, isoform CRA_a OS=Homo sapiens GN=NDUFB1 PE=4 SV=1;>sp|O75438|NDUB1_HUMAN NADH dehydrogenase [ubiquinone] 1 beta subcomplex subunit 1 OS=Homo sapiens GN=NDUFB1 PE=1
Elongation factor Tu, mitochondrial OS	TUFM	49.541	0.367569	-0.167236	-0.127841	-0.479412	0.105544	353	3922900000	1384800000	1307800000	1897500000	796270000	570720000	872690000	286360000	294240000	1152800000	302180000	442880000	19	18	19	56.2	52.4	46.9	54	>sp|P49411|EFTU_HUMAN Elongation factor Tu, mitochondrial OS=Homo sapiens GN=TUFM PE=1 SV=2
60S ribosomal protein L7 OS	RPL7	24.433	0.366533	-0.443499	0.262553	-1.28557	-0.307484	131	800060000	277600000	267590000	301380000	96927000	111730000	169070000	76182000	39080000	329600000	104490000	116780000	7	6	8	40.4	35.6	30.3	40.4	>tr|A8MUD9|A8MUD9_HUMAN 60S ribosomal protein L7 OS=Homo sapiens GN=RPL7 PE=1 SV=1;>sp|P18124|RL7_HUMAN 60S ribosomal protein L7 OS=Homo sapiens GN=RPL7 PE=1 SV=1;>tr|A0A024R814|A0A024R814_HUMAN Ribosomal protein L7, isoform CRA_a OS=Homo sapiens GN=RPL7 P
28S ribosomal protein S5, mitochondrial OS	MRPS5	48.006	0.365726	-0.0988685	-0.279494	0.0697021	-0.0868137	426	60409000	21429000	21907000	19637000	7932200	6417200	16603000	5516300	6129300	24169000	7980200	9360100	3	3	4	13.5	9.8	10	13.5	>sp|P82675|RT05_HUMAN 28S ribosomal protein S5, mitochondrial OS=Homo sapiens GN=MRPS5 PE=1 SV=2
cDNA FLJ55438, highly similar to Splicing factor 3 subunit 1 OS		77.406	0.362004	-0.849079	-2.11923	0.830174	-1.25818	5	41385000	17242000	15297000	10071000	6092500	1482300	18591000	5987400	10628000	12723000	5162500	3186700	3	4	3	10.7	7.1	7.7	6.1	>tr|B4E091|B4E091_HUMAN cDNA FLJ55438, highly similar to Splicing factor 3 subunit 1 OS=Homo sapiens PE=2 SV=1;>tr|A0A024R1K8|A0A024R1K8_HUMAN Splicing factor 3a, subunit 1, 120kDa, isoform CRA_a OS=Homo sapiens GN=SF3A1 PE=4 SV=1;>sp|Q15459|SF3A1_HUMAN Sp
SRA stem-loop-interacting RNA-binding protein, mitochondrial OS	SLIRP	10.353	0.361262	0.0298657	-0.0129557	0.0127833	0.0897694	634	201700000	64324000	70942000	76090000	28133000	23136000	64029000	19268000	22149000	61582000	16923000	25657000	3	3	3	39.1	39.1	39.1	39.1	>tr|A0A087WUN7|A0A087WUN7_HUMAN SRA stem-loop-interacting RNA-binding protein, mitochondrial OS=Homo sapiens GN=SLIRP PE=4 SV=1;>tr|H0YJ40|H0YJ40_HUMAN SRA stem-loop-interacting RNA-binding protein, mitochondrial (Fragment) OS=Homo sapiens GN=SLIRP PE=1 SV
Isoform 2 of Coatomer subunit beta OS	COPB2	99.045	0.359841	-0.522575	0.146525	-1.59566	-0.118586	81	159160000	55080000	54749000	75323000	26849000	26887000	27591000	13205000	5414900	56242000	15026000	22447000	7	5	8	14.3	11.4	6.7	13.1	>sp|P35606-2|COPB2_HUMAN Isoform 2 of Coatomer subunit beta OS=Homo sapiens GN=COPB2;>sp|P35606|COPB2_HUMAN Coatomer subunit beta OS=Homo sapiens GN=COPB2 PE=1 SV=2
Isoform 2 of Thioredoxin-dependent peroxide reductase, mitochondrial OS	PRDX3	25.838	0.357924	0.0905212	-0.0894822	0.131458	0.229588	706	385940000	129100000	132630000	174430000	65005000	53960000	158840000	50082000	57793000	52679000	14016000	20882000	5	6	3	39.1	29	39.1	19.3	>sp|P30048-2|PRDX3_HUMAN Isoform 2 of Thioredoxin-dependent peroxide reductase, mitochondrial OS=Homo sapiens GN=PRDX3;>sp|P30048|PRDX3_HUMAN Thioredoxin-dependent peroxide reductase, mitochondrial OS=Homo sapiens GN=PRDX3 PE=1 SV=3;>tr|Q53HC2|Q53HC2_HUMAN
Methionine adenosyltransferase 2 subunit beta OS	MAT2B	37.551	0.356038	-0.434017	-0.162703	-1.32128	0.181929	136	355260000	117770000	116960000	175790000	60053000	55214000	70546000	28355000	16089000	108930000	29363000	45660000	7	6	6	27.8	27.8	24.3	24.3	>sp|Q9NZL9|MAT2B_HUMAN Methionine adenosyltransferase 2 subunit beta OS=Homo sapiens GN=MAT2B PE=1 SV=1;>sp|Q9NZL9-4|MAT2B_HUMAN Isoform 4 of Methionine adenosyltransferase 2 subunit beta OS=Homo sapiens GN=MAT2B;>tr|A8K7A4|A8K7A4_HUMAN cDNA FLJ76904, high
IQ motif containing GTPase activating protein 1 OS	IQGAP1	189.28	0.355649	-0.334548	0.108892	-1.02715	-0.0853896	197	2125100000	723210000	688090000	1054500000	382660000	349340000	347120000	127080000	74852000	723510000	213460000	263890000	40	32	40	37.7	31.8	26.1	34.7	>tr|A4QPB0|A4QPB0_HUMAN IQ motif containing GTPase activating protein 1 OS=Homo sapiens GN=IQGAP1 PE=2 SV=1;>tr|A0A024RC65|A0A024RC65_HUMAN HCG1991735, isoform CRA_a OS=Homo sapiens GN=hCG_1991735 PE=4 SV=1;>sp|P46940|IQGA1_HUMAN Ras GTPase-activating-like
Transmembrane and coiled-coil domain-containing protein 1 OS	TMCO1	11.372	0.35433	0.227284	-0.162864	0.662023	0.182692	781	200480000	67324000	70733000	69922000	24058000	22310000	82539000	28869000	28320000	48016000	14396000	20102000	2	2	2	21.2	21.2	21.2	21.2	>tr|J3QQY2|J3QQY2_HUMAN Transmembrane and coiled-coil domain-containing protein 1 OS=Homo sapiens GN=TMCO1 PE=1 SV=1;>sp|Q9UM00-2|TMCO1_HUMAN Isoform 2 of Transmembrane and coiled-coil domain-containing protein 1 OS=Homo sapiens GN=TMCO1;>tr|B7Z591|B7Z591_
Coatomer subunit beta OS	COPB1	107.14	0.353067	-0.701222	0.0633648	-2.18167	0.014641	19	40378000	18182000	11125000	17296000	6448100	5903900	12098000	8581300	1447100	10983000	3152100	3773800	3	3	2	8.8	4.7	6.1	3.6	>sp|P53618|COPB_HUMAN Coatomer subunit beta OS=Homo sapiens GN=COPB1 PE=1 SV=3
ARP3 actin-related protein 3 homolog (Yeast), isoform CRA	ACTR3	47.371	0.351484	-0.163471	-0.0579172	-0.502199	0.0697021	357	73757000	20933000	32396000	47343000	11996000	23470000	15727000	6325200	4348000	10687000	2611800	4577600	3	3	2	14.8	10	12	7.2	>tr|A0A024RAI1|A0A024RAI1_HUMAN ARP3 actin-related protein 3 homolog (Yeast), isoform CRA_a OS=Homo sapiens GN=ACTR3 PE=3 SV=1;>sp|P61158|ARP3_HUMAN Actin-related protein 3 OS=Homo sapiens GN=ACTR3 PE=1 SV=3;>tr|B4DXW1|B4DXW1_HUMAN Actin-related protein 3
Succinate dehydrogenase [ubiquinone] iron-sulfur subunit, mitochondrial OS	SDHB	31.629	0.350513	0.032069	-0.0224636	0.0238941	0.0947765	637	658370000	214630000	238480000	341980000	121240000	115280000	138030000	40644000	46310000	178360000	52745000	76892000	10	9	9	37.5	37.5	37.5	36.1	>sp|P21912|SDHB_HUMAN Succinate dehydrogenase [ubiquinone] iron-sulfur subunit, mitochondrial OS=Homo sapiens GN=SDHB PE=1 SV=3;>tr|A0A087WWT1|A0A087WWT1_HUMAN Succinate dehydrogenase [ubiquinone] iron-sulfur subunit, mitochondrial (Fragment) OS=Homo sapie
Cytochrome b-c1 complex subunit 1, mitochondrial OS	UQCRC1	52.645	0.350477	-0.0457685	-0.0789446	0.0500489	-0.10841	514	839190000	279970000	294190000	394390000	148940000	130700000	209350000	60506000	73833000	235450000	70526000	89656000	12	9	10	44.6	42.5	29	29.2	>sp|P31930|QCR1_HUMAN Cytochrome b-c1 complex subunit 1, mitochondrial OS=Homo sapiens GN=UQCRC1 PE=1 SV=3;>tr|B4DUL5|B4DUL5_HUMAN cDNA FLJ51625, highly similar to Ubiquinol-cytochrome-c reductase complex coreprotein I, mitochondrial (EC 1.10.2.2) OS=Homo
CDW3/SMU1 OS	SMU1	57.543	0.350381	-0.0481453	-0.137632	0.0396999	-0.0465038	508	86876000	28860000	29120000	39165000	14499000	13763000	22017000	6569300	7410600	25695000	7791700	7947000	5	5	5	12.1	9.2	10.1	10.1	>tr|A0MNN4|A0MNN4_HUMAN CDW3/SMU1 OS=Homo sapiens GN=SMU1 PE=2 SV=1;>sp|Q2TAY7|SMU1_HUMAN WD40 repeat-containing protein SMU1 OS=Homo sapiens GN=SMU1 PE=1 SV=2;>sp|Q2TAY7-2|SMU1_HUMAN Isoform 2 of WD40 repeat-containing protein SMU1 OS=Homo sapiens GN=SMU1
Isoform 2 of Ubiquitin-like modifier-activating enzyme 1 OS	UBA1	113.8	0.348551	-0.378195	0.0143553	-1.18639	0.0374524	169	1444200000	526450000	450590000	714210000	272720000	227480000	333340000	136260000	68714000	396630000	117470000	154400000	22	21	21	35.4	30.6	29.3	29.2	>sp|P22314-2|UBA1_HUMAN Isoform 2 of Ubiquitin-like modifier-activating enzyme 1 OS=Homo sapiens GN=UBA1;>tr|A0A024R1A3|A0A024R1A3_HUMAN Ubiquitin-activating enzyme E1 (A1S9T and BN75 temperature sensitivity complementing), isoform CRA_a OS=Homo sapiens GN
Putative uncharacterized protein Nbla03646 OS	Nbla03646	49.436	0.348187	0.0880336	0.237686	0.112233	-0.0858182	703	86611000	27100000	31961000	40516000	12830000	14800000	17775000	5109800	5870900	28320000	9160000	11289000	2	2	2	4.9	4.9	4.9	4.9	>tr|Q3LIE7|Q3LIE7_HUMAN Putative uncharacterized protein Nbla03646 OS=Homo sapiens GN=Nbla03646 PE=2 SV=1;>sp|Q15392-2|DHC24_HUMAN Isoform 2 of Delta(24)-sterol reductase OS=Homo sapiens GN=DHCR24;>sp|Q15392|DHC24_HUMAN Delta(24)-sterol reductase OS=Homo s
Isoform 2 of 6-phosphogluconate dehydrogenase, decarboxylating OS	PGD	51.872	0.345497	-0.564572	-0.045357	-1.77705	0.128689	58	1706800000	618740000	503800000	719920000	277980000	239440000	428720000	209600000	75475000	558210000	131160000	188880000	12	12	11	37.2	32.3	34.7	32.1	>sp|P52209-2|6PGD_HUMAN Isoform 2 of 6-phosphogluconate dehydrogenase, decarboxylating OS=Homo sapiens GN=PGD;>sp|P52209|6PGD_HUMAN 6-phosphogluconate dehydrogenase, decarboxylating OS=Homo sapiens GN=PGD PE=1 SV=3;>tr|B4DL86|B4DL86_HUMAN 6-phosphogluconat
Protein S100 OS	HEL-S-43	11.74	0.344529	-0.466215	-0.252123	-1.42569	0.279174	112	118620000	42981000	36123000	42015000	16862000	13666000	38188000	17105000	8166500	38414000	9013300	14290000	2	2	2	23.8	23.8	23.8	23.8	>tr|V9HWH9|V9HWH9_HUMAN Protein S100 OS=Homo sapiens GN=HEL-S-43 PE=2 SV=1;>tr|B2R5H0|B2R5H0_HUMAN Protein S100 OS=Homo sapiens PE=2 SV=1;>sp|P31949|S10AB_HUMAN Protein S100-A11 OS=Homo sapiens GN=S100A11 PE=1 SV=2
T-complex protein 1 subunit delta OS		57.952	0.343904	-0.371548	-0.00484117	-1.17469	0.0648829	171	266750000	91068000	83863000	117760000	38391000	40425000	62447000	27515000	12847000	86545000	25161000	30591000	10	9	9	31.4	27.5	22.1	20.6	>tr|A8K3C3|A8K3C3_HUMAN T-complex protein 1 subunit delta OS=Homo sapiens PE=2 SV=1;>sp|P50991|TCPD_HUMAN T-complex protein 1 subunit delta OS=Homo sapiens GN=CCT4 PE=1 SV=4;>tr|B7Z9L0|B7Z9L0_HUMAN cDNA, FLJ78874, highly similar to T-complex protein 1 subu
Isoform 4 of Caseinolytic peptidase B protein homolog OS	CLPB	74.542	0.34316	-0.0695867	-0.0553214	-0.206828	0.0533895	470	253910000	86355000	94910000	125720000	39695000	51185000	44072000	15281000	14742000	84117000	31379000	28982000	9	6	7	18.1	18.1	12.8	13.9	>sp|Q9H078-4|CLPB_HUMAN Isoform 4 of Caseinolytic peptidase B protein homolog OS=Homo sapiens GN=CLPB;>sp|Q9H078-2|CLPB_HUMAN Isoform 2 of Caseinolytic peptidase B protein homolog OS=Homo sapiens GN=CLPB;>sp|Q9H078|CLPB_HUMAN Caseinolytic peptidase B prote
Phosphoglycerate kinase OS	HEL-S-68p	44.614	0.34134	-0.525427	-0.0592093	-1.66438	0.147307	78	1307600000	460080000	387280000	599000000	216810000	179540000	376730000	159790000	72516000	331910000	83484000	135220000	14	14	13	49.6	49.4	45.3	49.4	>tr|V9HWF4|V9HWF4_HUMAN Phosphoglycerate kinase OS=Homo sapiens GN=HEL-S-68p PE=2 SV=1;>sp|P00558|PGK1_HUMAN Phosphoglycerate kinase 1 OS=Homo sapiens GN=PGK1 PE=1 SV=3;>sp|P00558-2|PGK1_HUMAN Isoform 2 of Phosphoglycerate kinase 1 OS=Homo sapiens GN=PGK1;
Leucine-rich repeat-containing protein 59 OS	LRRC59	34.93	0.340902	0.102507	0.320542	-0.0497705	0.0367495	720	457000000	135610000	163740000	198410000	62886000	68641000	136040000	37856000	45991000	122550000	34865000	49111000	8	7	7	30	30	30	26.7	>sp|Q96AG4|LRC59_HUMAN Leucine-rich repeat-containing protein 59 OS=Homo sapiens GN=LRRC59 PE=1 SV=1
Proteasome subunit beta type-4 OS	PSMB4	29.204	0.340218	-0.283637	0.0740944	-0.901149	-0.0238563	245	66066000	22481000	19805000	18099000	5979100	6809400	36302000	13532000	8285600	11665000	2970000	4709500	3	4	3	33.7	18.9	24.6	25	>sp|P28070|PSB4_HUMAN Proteasome subunit beta type-4 OS=Homo sapiens GN=PSMB4 PE=1 SV=4;>tr|B4DFL3|B4DFL3_HUMAN cDNA FLJ56661, highly similar to Proteasome subunit beta type 4 (EC 3.4.25.1) OS=Homo sapiens PE=2 SV=1
Malate dehydrogenase OS	HEL-S-32	36.426	0.339864	-0.38512	-0.0713606	-1.2194	0.135404	165	162110000	55291000	49117000	62668000	23769000	19158000	53136000	20754000	11381000	46306000	10769000	18579000	5	4	5	24.3	18.3	17.7	20.4	>tr|V9HWF2|V9HWF2_HUMAN Malate dehydrogenase OS=Homo sapiens GN=HEL-S-32 PE=2 SV=1;>sp|P40925|MDHC_HUMAN Malate dehydrogenase, cytoplasmic OS=Homo sapiens GN=MDH1 PE=1 SV=4;>sp|P40925-3|MDHC_HUMAN Isoform 3 of Malate dehydrogenase, cytoplasmic OS=Homo sapi
Calcium uptake protein 2, mitochondrial OS	MICU2	49.666	0.338933	0.336312	-0.0293672	1.07416	-0.0358602	802	47823000	14574000	18042000	19767000	7953600	6376900	13540000	2872500	6558200	14517000	3747600	5107000	3	3	3	9.7	9.7	9.7	9.7	>sp|Q8IYU8|MICU2_HUMAN Calcium uptake protein 2, mitochondrial OS=Homo sapiens GN=MICU2 PE=1 SV=2
Kynureninase OS	KYNU	52.351	0.338634	-0.442436	-0.0620831	-1.40679	0.141564	133	899540000	315270000	276740000	403170000	153340000	135980000	206890000	90871000	38893000	289480000	71066000	101870000	12	9	10	34	31.2	22.4	25.2	>sp|Q16719|KYNU_HUMAN Kynureninase OS=Homo sapiens GN=KYNU PE=1 SV=1;>tr|A8K4D5|A8K4D5_HUMAN Kynureninase OS=Homo sapiens GN=KYNU PE=2 SV=1;>tr|Q53F63|Q53F63_HUMAN Kynureninase (L-kynurenine hydrolase) variant (Fragment) OS=Homo sapiens PE=2 SV=1;>tr|A8K7T
SFPQ protein (Fragment) OS	SFPQ	68.63	0.336863	-1.00592	-1.91959	1.20276	-2.30095	2	231100000	85399000	108150000	38400000	22147000	6394600	134830000	33267000	90152000	57877000	29986000	11607000	4	8	6	22.4	9.6	20.2	13.2	>tr|Q9BSV4|Q9BSV4_HUMAN SFPQ protein (Fragment) OS=Homo sapiens GN=SFPQ PE=2 SV=2;>tr|Q86VG2|Q86VG2_HUMAN Splicing factor proline/glutamine-rich (Polypyrimidine tract binding protein associated) OS=Homo sapiens GN=SFPQ PE=2 SV=1;>sp|P23246|SFPQ_HUMAN Splic
Actin related protein 2/3 complex, subunit 1B, 41kDa OS	ARPC1B	40.949	0.3364	-0.20983	0.00273846	-0.672911	0.040682	309	179710000	61206000	61239000	70977000	27097000	24714000	46382000	17783000	13322000	62352000	16327000	23202000	4	5	4	22	12.4	21.8	12.4	>tr|A4D275|A4D275_HUMAN Actin related protein 2/3 complex, subunit 1B, 41kDa OS=Homo sapiens GN=ARPC1B PE=2 SV=1;>sp|O15143|ARC1B_HUMAN Actin-related protein 2/3 complex subunit 1B OS=Homo sapiens GN=ARPC1B PE=1 SV=3
Putative uncharacterized protein (Fragment) OS		28.826	0.335761	0.214816	-0.155566	0.658189	0.141825	776	45618000	14490000	15269000	26198000	9273500	7620600	8593600	2379600	2999300	10826000	2837400	4649000	4	4	3	27.5	24	23.6	17.1	>tr|Q9BTA1|Q9BTA1_HUMAN Putative uncharacterized protein (Fragment) OS=Homo sapiens PE=2 SV=1;>tr|B3KNH1|B3KNH1_HUMAN cDNA FLJ14598 fis, clone NT2RM4002558, highly similar to Long-chain fatty acid transport protein 4 (EC 6.2.1.-) OS=Homo sapiens PE=2 SV=1;
Isoform 2 of GMP synthase [glutamine-hydrolyzing] OS	GMPS	65.928	0.335675	-0.291796	0.041243	-0.937685	0.0210533	238	123820000	39547000	41884000	61119000	21018000	19757000	21587000	7222900	5319900	41111000	11307000	16807000	4	4	5	13.1	7.1	10.1	10.1	>sp|P49915-2|GUAA_HUMAN Isoform 2 of GMP synthase [glutamine-hydrolyzing] OS=Homo sapiens GN=GMPS;>tr|B4DUT7|B4DUT7_HUMAN cDNA FLJ57604, highly similar to GMP synthase (glutamine-hydrolyzing) (EC 6.3.5.2) OS=Homo sapiens PE=2 SV=1;>tr|Q53F90|Q53F90_HUMAN G
Archain 1, isoform CRA	ARCN1	57.21	0.335444	-0.588431	0.0305479	-1.89143	0.095587	48	22808000	9055800	5751100	7114200	2485400	2309500	10524000	5344400	1644000	5169400	1226100	1797600	3	3	3	9.6	7	7	7	>tr|B0YIW5|B0YIW5_HUMAN Archain 1, isoform CRA_b OS=Homo sapiens GN=ARCN1 PE=2 SV=1;>sp|P48444|COPD_HUMAN Coatomer subunit delta OS=Homo sapiens GN=ARCN1 PE=1 SV=1;>tr|Q6MZV5|Q6MZV5_HUMAN Putative uncharacterized protein DKFZp686M09245 OS=Homo sapiens GN=D
Transmembrane protein 33 (Fragment) OS	TMEM33	25.223	0.335439	0.0914626	0.218595	0.164529	-0.108736	707	107020000	34261000	39813000	44151000	15099000	15042000	28369000	8595000	10920000	34504000	10567000	13851000	3	3	3	13.5	13.5	13.5	13.5	>tr|D6RAA6|D6RAA6_HUMAN Transmembrane protein 33 (Fragment) OS=Homo sapiens GN=TMEM33 PE=1 SV=1;>tr|A6QKW0|A6QKW0_HUMAN SHINC3 OS=Homo sapiens GN=SHINC3 PE=2 SV=1;>tr|A0A024R9W7|A0A024R9W7_HUMAN Transmembrane protein 33, isoform CRA_a OS=Homo sapiens GN=TM
Eukaryotic translation initiation factor 2, subunit 1 alpha, 35kDa, isoform CRA	EIF2S1	36.112	0.33429	-0.308255	0.140386	-0.980939	-0.0842114	226	207870000	80475000	65579000	77991000	30895000	25729000	53624000	21472000	12148000	76254000	28109000	27702000	7	7	8	27.9	27	24.8	27.9	>tr|Q53XC0|Q53XC0_HUMAN Eukaryotic translation initiation factor 2, subunit 1 alpha, 35kDa, isoform CRA_a OS=Homo sapiens GN=EIF2S1 PE=2 SV=1;>sp|P05198|IF2A_HUMAN Eukaryotic translation initiation factor 2 subunit 1 OS=Homo sapiens GN=EIF2S1 PE=1 SV=3;>tr
UDP-glucose 6-dehydrogenase OS	UGDH	55.023	0.332874	-0.312644	-0.213621	-0.96016	0.23585	221	1990300000	671430000	610780000	821350000	324720000	262640000	574540000	215650000	139390000	594450000	131060000	208740000	21	21	16	55.5	53	48	42.3	>sp|O60701|UGDH_HUMAN UDP-glucose 6-dehydrogenase OS=Homo sapiens GN=UGDH PE=1 SV=1;>sp|O60701-2|UGDH_HUMAN Isoform 2 of UDP-glucose 6-dehydrogenase OS=Homo sapiens GN=UGDH;>sp|O60701-3|UGDH_HUMAN Isoform 3 of UDP-glucose 6-dehydrogenase OS=Homo sapiens GN
Catenin (Cadherin-associated protein), beta 1, 88kDa, isoform CRA	CTNNB1	85.496	0.33133	-0.371256	-0.750397	0.459641	-0.823013	172	112170000	42122000	38190000	42143000	19157000	9952800	33732000	9459600	16080000	36294000	13506000	12158000	5	6	5	15.2	14	15.2	11.3	>tr|A0A024R2Q3|A0A024R2Q3_HUMAN Catenin (Cadherin-associated protein), beta 1, 88kDa, isoform CRA_a OS=Homo sapiens GN=CTNNB1 PE=4 SV=1;>sp|P35222|CTNB1_HUMAN Catenin beta-1 OS=Homo sapiens GN=CTNNB1 PE=1 SV=1;>tr|B4DSW9|B4DSW9_HUMAN cDNA FLJ59415, highly
Proteasome subunit alpha type OS		26.425	0.330023	-0.219297	-0.0234017	-0.709269	0.0747794	304	171030000	61730000	48347000	61709000	22780000	19035000	82514000	32377000	19716000	26807000	6572800	9596400	5	6	4	34	30.7	34	22.8	>tr|Q5U0A0|Q5U0A0_HUMAN Proteasome subunit alpha type OS=Homo sapiens PE=2 SV=1;>sp|P28066|PSA5_HUMAN Proteasome subunit alpha type-5 OS=Homo sapiens GN=PSMA5 PE=1 SV=3;>sp|P28066-2|PSA5_HUMAN Isoform 2 of Proteasome subunit alpha type-5 OS=Homo sapiens GN
ADP-ribosylation factor 1, isoform CRA	ARF1	20.697	0.329019	-0.566548	-0.024678	-1.83975	0.164786	57	136870000	49693000	43959000	75544000	26765000	26070000	28097000	13570000	4753500	33225000	9358700	13136000	3	3	2	37.6	31.5	37.6	33.7	>tr|A0A024R3Q3|A0A024R3Q3_HUMAN ADP-ribosylation factor 1, isoform CRA_a OS=Homo sapiens GN=ARF1 PE=3 SV=1;>tr|A0A024R0Y6|A0A024R0Y6_HUMAN ADP-ribosylation factor 3, isoform CRA_b OS=Homo sapiens GN=ARF3 PE=3 SV=1;>sp|P84077|ARF1_HUMAN ADP-ribosylation fac
Sorting and assembly machinery component 50 homolog OS	SAMM50	51.976	0.328808	0.121383	0.152897	0.341303	-0.13005	730	128670000	34632000	47476000	32556000	9333600	12363000	40891000	10289000	14950000	55217000	15009000	20163000	3	6	5	27.1	11.5	23	14.5	>sp|Q9Y512|SAM50_HUMAN Sorting and assembly machinery component 50 homolog OS=Homo sapiens GN=SAMM50 PE=1 SV=3
Enolase 1, (Alpha), isoform CRA	ENO1	47.168	0.328416	-0.4362	0.0473989	-1.42171	0.0657101	135	4630300000	1596100000	1430000000	1603000000	569410000	574490000	1498900000	642390000	272630000	1528400000	384340000	582860000	17	16	20	69.6	49.5	47.7	69.6	>tr|A0A024R4F1|A0A024R4F1_HUMAN Enolase 1, (Alpha), isoform CRA_a OS=Homo sapiens GN=ENO1 PE=4 SV=1;>sp|P06733|ENOA_HUMAN Alpha-enolase OS=Homo sapiens GN=ENO1 PE=1 SV=2;>tr|E2DRY6|E2DRY6_HUMAN Enolase OS=Homo sapiens PE=2 SV=1;>sp|P06733-2|ENOA_HUMAN Isof
cDNA FLJ75422, highly similar to Homo sapiens capping protein (actin filament) muscle Z-line, alpha 1, mRNA OS		32.908	0.328024	-0.193842	-0.0175777	0.0657101	-0.629657	322	56546000	19959000	18512000	18700000	7707700	6053000	19863000	5295700	6653100	17983000	6955400	5805700	3	4	3	31.1	16.8	24.1	17.8	>tr|A8K0T9|A8K0T9_HUMAN cDNA FLJ75422, highly similar to Homo sapiens capping protein (actin filament) muscle Z-line, alpha 1, mRNA OS=Homo sapiens PE=2 SV=1;>tr|A0A024R0E5|A0A024R0E5_HUMAN Capping protein (Actin filament) muscle Z-line, alpha 1, isoform C
Voltage-dependent anion-selective channel protein 3 OS	VDAC3	30.658	0.327817	0.338224	0.121944	1.08229	-0.189565	803	1286100000	336250000	456730000	550560000	179760000	170520000	399200000	66985000	171150000	336370000	89498000	115070000	9	9	9	48.4	44.5	41.3	44.5	>sp|Q9Y277|VDAC3_HUMAN Voltage-dependent anion-selective channel protein 3 OS=Homo sapiens GN=VDAC3 PE=1 SV=1;>sp|Q9Y277-2|VDAC3_HUMAN Isoform 2 of Voltage-dependent anion-selective channel protein 3 OS=Homo sapiens GN=VDAC3;>tr|E5RJN6|E5RJN6_HUMAN Voltage
Chaperonin containing TCP1, subunit 6A isoform a variant (Fragment) OS		57.761	0.32685	-0.449493	0.137504	-1.46554	-0.0204428	125	496040000	175160000	143420000	170930000	57101000	56904000	182440000	77064000	36223000	142680000	40998000	50293000	9	11	9	26.5	17.8	26.5	22.9	>tr|Q59ET3|Q59ET3_HUMAN Chaperonin containing TCP1, subunit 6A isoform a variant (Fragment) OS=Homo sapiens PE=2 SV=1;>tr|B2R9K8|B2R9K8_HUMAN cDNA, FLJ94440, highly similar to Homo sapiens chaperonin containing TCP1, subunit 6A (zeta 1)(CCT6A), mRNA OS=Hom
40S ribosomal protein S11 OS	RPS11	18.431	0.326097	-0.19486	0.0231843	-0.63803	0.0302654	321	271280000	92476000	93092000	118360000	40447000	41221000	69422000	29005000	17999000	83499000	23024000	33873000	4	4	4	29.7	18.4	29.1	18.4	>sp|P62280|RS11_HUMAN 40S ribosomal protein S11 OS=Homo sapiens GN=RPS11 PE=1 SV=3;>tr|M0QZC5|M0QZC5_HUMAN 40S ribosomal protein S11 OS=Homo sapiens GN=RPS11 PE=1 SV=1
Citrate synthase OS	CS	50.431	0.325137	-0.0637146	-0.158671	-0.111493	0.0790197	483	1609100000	528210000	558550000	737620000	276850000	229570000	410670000	122930000	142290000	460790000	128430000	186690000	11	11	11	23.2	23.2	23.2	23.2	>tr|B4DJV2|B4DJV2_HUMAN Citrate synthase OS=Homo sapiens GN=CS PE=1 SV=1;>tr|A0A024RB75|A0A024RB75_HUMAN Citrate synthase OS=Homo sapiens GN=CS PE=3 SV=1;>sp|O75390|CISY_HUMAN Citrate synthase, mitochondrial OS=Homo sapiens GN=CS PE=1 SV=2;>tr|B3KTN4|B3KTN
cDNA FLJ58073, moderately similar to Cathepsin B (EC 3.4.22.1) OS		30.767	0.324392	0.0519394	-0.0134216	0.170438	-0.00119793	660	166460000	46916000	60984000	45490000	16160000	15657000	101280000	25010000	37558000	19696000	5746900	7768900	3	5	2	18.7	12.1	18.7	8.1	>tr|B4DL49|B4DL49_HUMAN cDNA FLJ58073, moderately similar to Cathepsin B (EC 3.4.22.1) OS=Homo sapiens PE=2 SV=1;>tr|A8K2H4|A8K2H4_HUMAN cDNA FLJ78235 OS=Homo sapiens PE=2 SV=1;>tr|A0A024R374|A0A024R374_HUMAN Cathepsin B, isoform CRA_a OS=Homo sapiens GN=C
Pentatricopeptide repeat domain-containing protein 3, mitochondrial OS	PTCD3	78.549	0.324332	-0.0480981	-0.103922	-0.102217	0.0618453	509	196710000	69343000	67209000	104260000	41279000	32296000	39122000	12614000	13004000	53326000	15450000	21909000	7	6	6	17.3	14.4	9.4	9.4	>sp|Q96EY7|PTCD3_HUMAN Pentatricopeptide repeat domain-containing protein 3, mitochondrial OS=Homo sapiens GN=PTCD3 PE=1 SV=3
S-adenosylmethionine synthase isoform type-2 OS	MAT2A	43.66	0.322083	-0.449214	-0.145031	-1.45672	0.25411	126	183190000	64118000	64180000	82472000	29772000	27615000	19941000	9625000	4033200	80779000	24721000	32532000	6	4	7	17.5	15.7	13.2	17.5	>sp|P31153|METK2_HUMAN S-adenosylmethionine synthase isoform type-2 OS=Homo sapiens GN=MAT2A PE=1 SV=1;>sp|P31153-2|METK2_HUMAN Isoform 2 of S-adenosylmethionine synthase isoform type-2 OS=Homo sapiens GN=MAT2A;>tr|B4DEX8|B4DEX8_HUMAN S-adenosylmethionine
Isoform 2 of Deoxyuridine 5-triphosphate nucleotidohydrolase, mitochondrial OS	DUT	17.748	0.320798	-0.408784	-0.522468	-1.16353	0.459641	152	32935000	11731000	9483400	20275000	8428000	5899900	6325400	2433600	1436100	6333900	869630	2147400	3	2	3	32.9	25	18.9	24.4	>sp|P33316-2|DUT_HUMAN Isoform 2 of Deoxyuridine 5-triphosphate nucleotidohydrolase, mitochondrial OS=Homo sapiens GN=DUT;>tr|H0YNW5|H0YNW5_HUMAN Deoxyuridine 5-triphosphate nucleotidohydrolase, mitochondrial OS=Homo sapiens GN=DUT PE=1 SV=1;>sp|P33316|D
Atlastin-3 OS	ATL3	60.541	0.320265	0.0848644	0.240986	0.109829	-0.0962213	698	641260000	202470000	225490000	268220000	79373000	83937000	177320000	66199000	53646000	195710000	56895000	87906000	14	13	13	34.9	34.9	31.1	33.1	>sp|Q6DD88|ATLA3_HUMAN Atlastin-3 OS=Homo sapiens GN=ATL3 PE=1 SV=1;>tr|F5H6I7|F5H6I7_HUMAN Atlastin-3 OS=Homo sapiens GN=ATL3 PE=1 SV=1;>tr|B4DXC4|B4DXC4_HUMAN cDNA FLJ58636, moderately similar to Atlastin OS=Homo sapiens PE=2 SV=1
Signal peptidase complex subunit 3 homolog (S. cerevisiae), isoform CRA	SPCS3	20.312	0.319005	0.108663	0.0600474	-0.0813848	0.347325	724	70432000	21948000	26134000	22440000	7740200	7124900	15730000	5538000	5017300	32262000	8670000	13992000	2	2	3	17.8	12.8	12.8	17.8	>tr|D3DP46|D3DP46_HUMAN Signal peptidase complex subunit 3 homolog (S. cerevisiae), isoform CRA_a OS=Homo sapiens GN=SPCS3 PE=4 SV=1;>sp|P61009|SPCS3_HUMAN Signal peptidase complex subunit 3 OS=Homo sapiens GN=SPCS3 PE=1 SV=1
ATP synthase subunit gamma OS		27.512	0.318567	-0.0734023	-0.213186	0.0812032	-0.088224	464	299610000	96338000	106620000	113770000	43491000	37321000	85816000	21661000	31423000	100030000	31186000	37872000	3	3	3	13.2	13.2	13.2	13.2	>tr|B4DL14|B4DL14_HUMAN ATP synthase subunit gamma OS=Homo sapiens PE=2 SV=1;>tr|Q8TAS0|Q8TAS0_HUMAN ATP synthase subunit gamma (Fragment) OS=Homo sapiens PE=2 SV=1;>sp|P36542-2|ATPG_HUMAN Isoform Heart of ATP synthase subunit gamma, mitochondrial OS=Homo
Isoleucine--tRNA ligase, mitochondrial OS	IARS2	113.79	0.318359	-0.126316	-0.057737	-0.407995	0.0867838	396	5686400000	1882100000	2001900000	2761300000	990190000	897640000	1091500000	376830000	333780000	1833700000	515080000	770510000	35	31	32	37.5	37.5	34.7	34.8	>sp|Q9NSE4|SYIM_HUMAN Isoleucine--tRNA ligase, mitochondrial OS=Homo sapiens GN=IARS2 PE=1 SV=2;>tr|A8K5W7|A8K5W7_HUMAN cDNA FLJ75180, highly similar to Homo sapiens mitochondrial isoleucine tRNA synthetase, mRNA OS=Homo sapiens PE=2 SV=1
Aldo-keto reductase family 1, member B1 (Aldose reductase), isoform CRA	AKR1B1	35.853	0.316914	-0.500774	0.125387	-1.66937	0.0416635	92	2672800000	911940000	859310000	1081500000	360690000	386920000	675130000	286170000	106270000	916120000	265070000	366120000	12	14	13	51.9	46.2	51.9	48.7	>tr|A0A024R7A8|A0A024R7A8_HUMAN Aldo-keto reductase family 1, member B1 (Aldose reductase), isoform CRA_a OS=Homo sapiens GN=AKR1B1 PE=4 SV=1;>sp|P15121|ALDR_HUMAN Aldose reductase OS=Homo sapiens GN=AKR1B1 PE=1 SV=3;>tr|Q59EL5|Q59EL5_HUMAN Aldo-keto reduc
Lactamase, beta 2, isoform CRA	LACTB2	32.805	0.316798	-0.222887	0.227248	-0.674706	-0.221203	302	27976000	9345700	9614100	11304000	3771400	4204500	8660100	3097200	2423600	8012000	2477100	2986000	2	3	3	10.1	6.9	10.1	10.1	>tr|A0A024R811|A0A024R811_HUMAN Lactamase, beta 2, isoform CRA_a OS=Homo sapiens GN=LACTB2 PE=4 SV=1;>sp|Q53H82|LACB2_HUMAN Beta-lactamase-like protein 2 OS=Homo sapiens GN=LACTB2 PE=1 SV=2
Isoform 3 of Nucleolar protein 6 OS	NOL6	77.637	0.316351	-0.272928	-0.639377	0.363115	-0.542521	260	15748000	5779700	4769800	6584900	2846800	1614200	2632700	746170	1165300	6530000	2186800	1990300	2	2	2	7.7	5.2	5.2	4.9	>sp|Q9H6R4-3|NOL6_HUMAN Isoform 3 of Nucleolar protein 6 OS=Homo sapiens GN=NOL6;>sp|Q9H6R4-2|NOL6_HUMAN Isoform 2 of Nucleolar protein 6 OS=Homo sapiens GN=NOL6;>sp|Q9H6R4-4|NOL6_HUMAN Isoform 4 of Nucleolar protein 6 OS=Homo sapiens GN=NOL6;>sp|Q9H6R4|NO
Chromobox homolog 3 (HP1 gamma homolog, Drosophila) OS	CBX3	20.811	0.311657	-0.330051	-0.646767	0.448372	-0.791757	198	33209000	13189000	9980300	11321000	5317600	2503700	10549000	3057800	4386800	11339000	4813600	3089800	3	3	3	23	23	23	23	>tr|A4D177|A4D177_HUMAN Chromobox homolog 3 (HP1 gamma homolog, Drosophila) OS=Homo sapiens GN=CBX3 PE=4 SV=1;>sp|Q13185|CBX3_HUMAN Chromobox protein homolog 3 OS=Homo sapiens GN=CBX3 PE=1 SV=4
Fructose-bisphosphate aldolase OS	HEL-S-87p	39.42	0.311205	-0.403315	0.00776951	-1.35823	0.140517	159	1670700000	563610000	503960000	538060000	201480000	186030000	531500000	234370000	115390000	601100000	127750000	202540000	8	12	12	59.3	47	45.1	43.4	>tr|V9HWN7|V9HWN7_HUMAN Fructose-bisphosphate aldolase OS=Homo sapiens GN=HEL-S-87p PE=2 SV=1;>sp|P04075|ALDOA_HUMAN Fructose-bisphosphate aldolase A OS=Homo sapiens GN=ALDOA PE=1 SV=2;>tr|H3BQN4|H3BQN4_HUMAN Fructose-bisphosphate aldolase OS=Homo sapiens
Mitochondrial import inner membrane translocase subunit TIM44 (Fragment) OS	TIMM44	31.16	0.310194	0.0997484	0.166844	-0.131234	0.263635	716	49780000	15454000	17991000	18558000	5790100	6753600	12720000	4290700	3623300	18502000	5372700	7614400	4	4	6	27.5	17.9	18.7	27.5	>tr|M0QXU7|M0QXU7_HUMAN Mitochondrial import inner membrane translocase subunit TIM44 (Fragment) OS=Homo sapiens GN=TIMM44 PE=1 SV=1;>tr|Q9UPE4|Q9UPE4_HUMAN Mitochondrial import inner membrane translocase subunit TIM44 OS=Homo sapiens GN=hTIM44 PE=2 SV=1;>
Lon protease homolog, mitochondrial OS	LONP1	93.296	0.30879	-0.0693587	-0.148801	-0.155807	0.0965318	471	1157400000	367760000	411580000	550770000	192500000	179620000	193610000	58861000	62356000	412980000	116400000	169600000	22	16	20	39.7	35.6	23.6	35.3	>tr|K7EJE8|K7EJE8_HUMAN Lon protease homolog, mitochondrial OS=Homo sapiens GN=LONP1 PE=1 SV=1;>tr|K7EKE6|K7EKE6_HUMAN Lon protease homolog, mitochondrial OS=Homo sapiens GN=LONP1 PE=1 SV=1;>tr|B3KU28|B3KU28_HUMAN Lon protease homolog, mitochondrial OS=Hom
60S ribosomal protein L36 OS	RPL36	12.254	0.307808	-0.326028	0.102053	-1.10715	0.0270125	206	63218000	22073000	17740000	29684000	9798100	8097300	19706000	8507400	4395100	13829000	3767700	5247600	2	2	2	21.9	21.9	21.9	21.9	>sp|Q9Y3U8|RL36_HUMAN 60S ribosomal protein L36 OS=Homo sapiens GN=RPL36 PE=1 SV=3;>tr|J3KTD3|J3KTD3_HUMAN 60S ribosomal protein L36 (Fragment) OS=Homo sapiens GN=RPL36 PE=1 SV=1;>tr|J3QSB5|J3QSB5_HUMAN 60S ribosomal protein L36 OS=Homo sapiens GN=RPL36 PE
Peptidyl-prolyl cis-trans isomerase OS	HEL-S-39	22.742	0.307682	-0.120151	0.160533	-0.317948	-0.203037	402	1397900000	458510000	481090000	531200000	178390000	183520000	482510000	155370000	147910000	384200000	124740000	149670000	10	11	9	48.6	42.3	48.6	41.8	>tr|V9HWC6|V9HWC6_HUMAN Peptidyl-prolyl cis-trans isomerase OS=Homo sapiens GN=HEL-S-39 PE=2 SV=1;>sp|P23284|PPIB_HUMAN Peptidyl-prolyl cis-trans isomerase B OS=Homo sapiens GN=PPIB PE=1 SV=2
Zinc transporter 5 OS	SLC30A5	84.046	0.307067	0.260399	-0.230448	0.842617	0.169027	790	29081000	7811900	10888000	11998000	4026400	3754300	9153100	1887100	3923100	7930000	1898400	3210100	2	2	2	4.8	4.8	4.8	4.8	>sp|Q8TAD4|ZNT5_HUMAN Zinc transporter 5 OS=Homo sapiens GN=SLC30A5 PE=1 SV=1;>tr|D6REM2|D6REM2_HUMAN Zinc transporter 5 (Fragment) OS=Homo sapiens GN=SLC30A5 PE=1 SV=3;>sp|Q8TAD4-4|ZNT5_HUMAN Isoform 4 of Zinc transporter 5 OS=Homo sapiens GN=SLC30A5;>tr|
Heterogeneous nuclear ribonucleoprotein A2/B1, isoform CRA	HNRPA2B1	37.429	0.306134	-0.0995529	-0.249719	0.137766	-0.186705	424	4757700000	1564000000	1596800000	1886000000	758090000	533840000	1246500000	342730000	498610000	1625300000	463150000	564390000	19	18	19	66	66	65.7	66	>tr|A0A024RA61|A0A024RA61_HUMAN Heterogeneous nuclear ribonucleoprotein A2/B1, isoform CRA_c OS=Homo sapiens GN=HNRPA2B1 PE=4 SV=1;>sp|P22626|ROA2_HUMAN Heterogeneous nuclear ribonucleoproteins A2/B1 OS=Homo sapiens GN=HNRNPA2B1 PE=1 SV=2;>tr|A0A024RA27|A0
Epididymis secretory sperm binding protein Li 128m OS	HEL-S-128m	25.035	0.304587	-0.421845	0.0900404	-1.44399	0.088413	142	163360000	58070000	53603000	63616000	22218000	22413000	47613000	21372000	9270900	52131000	14480000	21919000	8	7	6	48.7	48.7	41.1	37.1	>tr|V9HWC7|V9HWC7_HUMAN Epididymis secretory sperm binding protein Li 128m OS=Homo sapiens GN=HEL-S-128m PE=2 SV=1;>sp|P30041|PRDX6_HUMAN Peroxiredoxin-6 OS=Homo sapiens GN=PRDX6 PE=1 SV=3
Radixin OS	RDX	68.563	0.301614	-0.544746	0.425996	-1.81995	-0.240282	70	37115000	13476000	10762000	11535000	3735100	4365900	13254000	6438100	1938700	12327000	3302700	4457000	1	2	2	16.1	7.4	16.1	11.5	>tr|B0YJ88|B0YJ88_HUMAN Radixin OS=Homo sapiens GN=RDX PE=2 SV=1;>sp|P35241|RADI_HUMAN Radixin OS=Homo sapiens GN=RDX PE=1 SV=1;>sp|P35241-5|RADI_HUMAN Isoform 5 of Radixin OS=Homo sapiens GN=RDX;>tr|B7Z2S7|B7Z2S7_HUMAN cDNA FLJ58499, highly similar to Rad
Proteasome subunit alpha type OS	PSMA6	22.842	0.300177	-0.243396	0.0057592	-0.838538	0.102591	280	182860000	62069000	59345000	72510000	26268000	25649000	60263000	21799000	14681000	50088000	14001000	19015000	6	6	4	36	36	36	21.7	>tr|G3V295|G3V295_HUMAN Proteasome subunit alpha type OS=Homo sapiens GN=PSMA6 PE=1 SV=1;>sp|P60900|PSA6_HUMAN Proteasome subunit alpha type-6 OS=Homo sapiens GN=PSMA6 PE=1 SV=1;>tr|G3V5Z7|G3V5Z7_HUMAN Proteasome subunit alpha type OS=Homo sapiens GN=PSMA6
Phosphoglycerate mutase 1 (Brain) OS	PGAM1	28.82	0.298594	-0.457976	-0.00946622	-1.5807	0.216238	120	474480000	162630000	149660000	209430000	72869000	67533000	110720000	52615000	21270000	154330000	37142000	60854000	7	7	7	45.3	41.3	40.9	41.3	>tr|Q6P6D7|Q6P6D7_HUMAN Phosphoglycerate mutase 1 (Brain) OS=Homo sapiens GN=PGAM1 PE=2 SV=1;>tr|Q6FHU2|Q6FHU2_HUMAN Epididymis secretory protein Li 35 (Fragment) OS=Homo sapiens GN=PGAM1 PE=2 SV=1;>tr|Q53G35|Q53G35_HUMAN Phosphoglycerate mutase (Fragment)
Isoform 2 of Bifunctional purine biosynthesis protein PURH OS	ATIC	64.523	0.296316	-0.584655	0.290188	-2.02691	-0.0172418	49	51322000	16867000	15526000	15163000	4700700	6251400	11579000	5681100	1971300	24580000	6485300	7303400	2	2	3	27.9	23.2	18.6	24.2	>sp|P31939-2|PUR9_HUMAN Isoform 2 of Bifunctional purine biosynthesis protein PURH OS=Homo sapiens GN=ATIC;>tr|V9HWH7|V9HWH7_HUMAN Epididymis secretory sperm binding protein Li 70p OS=Homo sapiens GN=HEL-S-70p PE=2 SV=1;>tr|B2R7P8|B2R7P8_HUMAN cDNA, FLJ935
Phosphoglucomutase-1 OS	PGM1	61.448	0.296233	-0.423664	0.0753272	-1.47646	0.13014	141	69714000	23694000	23050000	26275000	10447000	8969900	17620000	7044700	3774700	25818000	6202600	10305000	5	5	5	13.5	10.3	10.5	10.5	>sp|P36871|PGM1_HUMAN Phosphoglucomutase-1 OS=Homo sapiens GN=PGM1 PE=1 SV=3;>tr|B4DFP1|B4DFP1_HUMAN cDNA FLJ51818, highly similar to Phosphoglucomutase-1 (EC 5.4.2.2) OS=Homo sapiens PE=2 SV=1;>tr|B7Z6C2|B7Z6C2_HUMAN cDNA FLJ50663, highly similar to Phosp
Transgelin-2 (Fragment) OS	TAGLN2	21.086	0.295855	-0.609235	0.0780633	-2.1235	0.217727	40	105330000	35136000	34827000	26843000	9848600	10265000	33367000	15418000	8224400	45124000	9870000	16337000	3	4	4	27.3	19.8	27.3	27.3	>tr|X6RJP6|X6RJP6_HUMAN Transgelin-2 (Fragment) OS=Homo sapiens GN=TAGLN2 PE=1 SV=1;>sp|P37802|TAGL2_HUMAN Transgelin-2 OS=Homo sapiens GN=TAGLN2 PE=1 SV=3;>sp|P37802-2|TAGL2_HUMAN Isoform 2 of Transgelin-2 OS=Homo sapiens GN=TAGLN2
Integrin beta-1 OS	ITGB1	88.414	0.295733	0.418513	-0.36898	1.40332	0.221197	813	151650000	42023000	58714000	56253000	23392000	15501000	53567000	8638600	28202000	41833000	9991900	15011000	5	6	5	11.5	7.5	8.9	8.6	>sp|P05556|ITB1_HUMAN Integrin beta-1 OS=Homo sapiens GN=ITGB1 PE=1 SV=2;>sp|P05556-2|ITB1_HUMAN Isoform 2 of Integrin beta-1 OS=Homo sapiens GN=ITGB1;>sp|P05556-5|ITB1_HUMAN Isoform 5 of Integrin beta-1 OS=Homo sapiens GN=ITGB1;>sp|P05556-4|ITB1_HUMAN Iso
Transmembrane protein 165 OS	TMEM165	34.905	0.295672	0.399282	-0.202041	1.38582	0.0140695	809	53578000	13794000	20673000	15971000	6225700	5486500	24227000	4806800	10806000	13380000	2761500	4381400	2	2	2	13.6	13.6	13.6	13.6	>sp|Q9HC07|TM165_HUMAN Transmembrane protein 165 OS=Homo sapiens GN=TMEM165 PE=1 SV=1;>tr|B3KNQ2|B3KNQ2_HUMAN cDNA FLJ30150 fis, clone BRACE2000300, highly similar to Transmembrane protein TPARL OS=Homo sapiens PE=2 SV=1;>tr|V9GY93|V9GY93_HUMAN Transmembra
28S ribosomal protein S17, mitochondrial OS	MRPS17	14.502	0.295586	-0.0392785	-0.0829273	0.0583859	-0.0932941	527	45406000	14451000	15857000	20914000	7801900	6289000	10858000	3166500	4100500	13635000	3482900	5467200	2	3	2	37.7	29.2	37.7	29.2	>sp|Q9Y2R5|RT17_HUMAN 28S ribosomal protein S17, mitochondrial OS=Homo sapiens GN=MRPS17 PE=2 SV=1;>tr|Q8IY71|Q8IY71_HUMAN MRPS17 protein (Fragment) OS=Homo sapiens GN=MRPS17 PE=2 SV=1;>tr|I3L0E3|I3L0E3_HUMAN 28S ribosomal protein S17, mitochondrial OS=Hom
L-lactate dehydrogenase OS	HEL-S-133P	36.688	0.293418	-0.448771	0.135141	-1.57407	0.0926134	127	5148200000	1783300000	1617400000	2150500000	764300000	767120000	1374000000	616880000	251420000	1623700000	402160000	598860000	13	12	13	49.7	44.6	48.8	49.1	>tr|V9HWB9|V9HWB9_HUMAN L-lactate dehydrogenase OS=Homo sapiens GN=HEL-S-133P PE=2 SV=1;>sp|P00338|LDHA_HUMAN L-lactate dehydrogenase A chain OS=Homo sapiens GN=LDHA PE=1 SV=2;>sp|P00338-3|LDHA_HUMAN Isoform 3 of L-lactate dehydrogenase A chain OS=Homo sap
Epididymis luminal protein 2 OS	HEL2	29.174	0.292759	-0.429801	0.014641	-1.50467	0.20063	138	1138800000	219770000	554320000	569810000	72338000	434510000	386380000	101230000	44246000	182570000	46208000	75561000	7	7	6	47.1	46.7	39.6	42	>tr|V9HW98|V9HW98_HUMAN Epididymis luminal protein 2 OS=Homo sapiens GN=HEL2 PE=2 SV=1;>sp|P62258|1433E_HUMAN 14-3-3 protein epsilon OS=Homo sapiens GN=YWHAE PE=1 SV=1;>tr|G9K389|G9K389_HUMAN YWHAE/FAM22B fusion protein (Fragment) OS=Homo sapiens GN=YWHAE/
Cytoplasmic dynein 1 intermediate chain 2 (Fragment) OS	DYNC1I2	20.756	0.291902	-0.28243	0.0347792	-0.992833	0.110764	247	35830000	12670000	10208000	18136000	6816500	5094700	8125800	3698800	2093000	9568000	2155200	3020500	3	2	3	30.8	30.8	18.9	30.8	>tr|E7EQU2|E7EQU2_HUMAN Cytoplasmic dynein 1 intermediate chain 2 (Fragment) OS=Homo sapiens GN=DYNC1I2 PE=1 SV=1;>tr|E7ESD3|E7ESD3_HUMAN Cytoplasmic dynein 1 intermediate chain 2 (Fragment) OS=Homo sapiens GN=DYNC1I2 PE=1 SV=1;>tr|E7EMU4|E7EMU4_HUMAN Cyto
SCAMP3 protein (Fragment) OS	SCAMP3	38.242	0.291855	0.182106	0.640806	-0.0614808	-0.0330085	765	125350000	38658000	46878000	67931000	21734000	23992000	32450000	8696300	13059000	24965000	8228300	9825900	3	4	3	23.6	15	23.1	9.8	>tr|Q6FHJ5|Q6FHJ5_HUMAN SCAMP3 protein (Fragment) OS=Homo sapiens GN=SCAMP3 PE=2 SV=1;>sp|O14828|SCAM3_HUMAN Secretory carrier-associated membrane protein 3 OS=Homo sapiens GN=SCAMP3 PE=1 SV=3;>sp|O14828-2|SCAM3_HUMAN Isoform 2 of Secretory carrier-associa
Argininosuccinate synthetase, isoform CRA	ASS	46.53	0.290436	-0.541185	-0.0269545	-1.89819	0.301588	72	357160000	136710000	100330000	143220000	52400000	47205000	122980000	63226000	17330000	90949000	21082000	35794000	6	7	4	21.8	18.7	21.8	10	>tr|Q5T6L4|Q5T6L4_HUMAN Argininosuccinate synthetase, isoform CRA_a OS=Homo sapiens GN=ASS PE=2 SV=1;>tr|A8KAP9|A8KAP9_HUMAN cDNA FLJ78448, highly similar to Homo sapiens argininosuccinate synthetase (ASS), transcript variant 1, mRNA OS=Homo sapiens PE=2 S
Proteasome subunit beta type (Fragment) OS		26.491	0.289716	-0.174138	-0.439226	-0.347784	0.264597	346	101010000	35816000	29957000	41429000	17208000	12512000	37901000	13134000	10751000	21684000	5474800	6693900	3	4	2	24.1	15.8	24.1	11.6	>tr|Q53FT8|Q53FT8_HUMAN Proteasome subunit beta type (Fragment) OS=Homo sapiens PE=2 SV=1;>sp|P20618|PSB1_HUMAN Proteasome subunit beta type-1 OS=Homo sapiens GN=PSMB1 PE=1 SV=2;>tr|Q59GN1|Q59GN1_HUMAN Proteasome subunit beta type (Fragment) OS=Homo sapien
Isoform 3 of Lysophospholipid acyltransferase 7 OS	MBOAT7	38.47	0.289603	0.112706	0.304044	0.201258	-0.167183	726	178320000	55395000	67550000	82539000	25869000	30850000	45440000	14081000	15422000	50337000	15446000	21278000	3	3	3	13.1	13.1	13.1	13.1	>sp|Q96N66-3|MBOA7_HUMAN Isoform 3 of Lysophospholipid acyltransferase 7 OS=Homo sapiens GN=MBOAT7;>tr|B4DDH8|B4DDH8_HUMAN cDNA FLJ55184, highly similar to Homo sapiens leukocyte receptor cluster (LRC) member 4 (LENG4), mRNA OS=Homo sapiens PE=2 SV=1;>sp|Q
cDNA FLJ76106, highly similar to Homo sapiens neurolysin (metallopeptidase M3 family) (NLN), mRNA OS		80.677	0.289189	-0.156054	0.0103502	-0.551099	0.072586	366	367940000	118360000	123820000	161340000	57827000	50668000	108600000	33927000	32342000	97996000	26602000	40808000	11	8	8	20.2	20.2	14.3	14.5	>tr|A8K9T8|A8K9T8_HUMAN cDNA FLJ76106, highly similar to Homo sapiens neurolysin (metallopeptidase M3 family) (NLN), mRNA OS=Homo sapiens PE=2 SV=1;>sp|Q9BYT8|NEUL_HUMAN Neurolysin, mitochondrial OS=Homo sapiens GN=NLN PE=1 SV=1;>tr|E9PCB6|E9PCB6_HUMAN Neu
Cytochrome b-c1 complex subunit Rieske, mitochondrial OS	UQCRFS1	29.668	0.288051	0.0937516	-0.104248	0.308943	0.0765591	710	78544000	25429000	28533000	30792000	11586000	9829700	22833000	6805000	8323500	24920000	7037700	10380000	2	3	2	18.6	10.9	18.6	10.6	>sp|P47985|UCRI_HUMAN Cytochrome b-c1 complex subunit Rieske, mitochondrial OS=Homo sapiens GN=UQCRFS1 PE=1 SV=2;>sp|P0C7P4|UCRIL_HUMAN Putative cytochrome b-c1 complex subunit Rieske-like protein 1 OS=Homo sapiens GN=UQCRFS1P1 PE=5 SV=1
cDNA FLJ51295, highly similar to Cell division cycle 5-like protein OS		89.225	0.285483	-0.546724	-1.50443	0.823994	-0.959739	68	18365000	7558200	6469900	7634200	4027200	1760600	7152300	2318200	3522900	3578800	1212700	1186400	2	3	2	7.7	3.7	6.5	3.7	>tr|B4DSH1|B4DSH1_HUMAN cDNA FLJ51295, highly similar to Cell division cycle 5-like protein OS=Homo sapiens PE=2 SV=1;>tr|B3KY60|B3KY60_HUMAN cDNA FLJ16777 fis, clone BRHIP2029567, highly similar to Cell division cycle 5-like protein OS=Homo sapiens PE=2 S
Chloride intracellular channel 1, isoform CRA	CLIC1	26.922	0.284245	-0.441279	-0.0019634	-1.57162	0.249749	134	126190000	43521000	37402000	45224000	17267000	14549000	43236000	18158000	8912100	37725000	8095900	13941000	4	5	3	34.9	27.8	34.9	24.1	>tr|Q5SRT3|Q5SRT3_HUMAN Chloride intracellular channel 1, isoform CRA_a OS=Homo sapiens GN=CLIC1 PE=2 SV=2;>tr|Q53FB0|Q53FB0_HUMAN Chloride intracellular channel 1 variant (Fragment) OS=Homo sapiens PE=2 SV=1;>sp|O00299|CLIC1_HUMAN Chloride intracellular c
Cytochrome c oxidase subunit 2 (Fragment) OS	cox2	20.548	0.283866	0.197102	-0.170313	0.686702	0.0749164	767	197940000	59258000	70440000	96639000	34485000	29174000	50014000	10946000	21252000	51284000	13827000	20014000	4	4	3	29.3	29.3	29.3	18.2	>tr|X2D546|X2D546_HUMAN Cytochrome c oxidase subunit 2 (Fragment) OS=Homo sapiens GN=cox2 PE=3 SV=1;>tr|X2D544|X2D544_HUMAN Cytochrome c oxidase subunit 2 (Fragment) OS=Homo sapiens GN=cox2 PE=3 SV=1;>tr|X2D537|X2D537_HUMAN Cytochrome c oxidase subunit 2 (
Glucose-6-phosphate isomerase OS		60.185	0.282339	-0.431022	0.117562	-1.55101	0.140386	137	1582500000	510340000	519510000	634810000	223940000	228980000	336030000	143760000	63139000	611690000	142640000	227390000	9	8	9	31.9	31.5	30.6	31.5	>tr|B4DE36|B4DE36_HUMAN Glucose-6-phosphate isomerase OS=Homo sapiens PE=2 SV=1;>sp|P06744|G6PI_HUMAN Glucose-6-phosphate isomerase OS=Homo sapiens GN=GPI PE=1 SV=4;>tr|B4DVJ0|B4DVJ0_HUMAN Glucose-6-phosphate isomerase OS=Homo sapiens PE=2 SV=1;>sp|P06744-
Carbonyl reductase [NADPH] 1 OS	CBR1	30.375	0.28222	-0.442516	0.0780633	-1.59122	0.185613	132	117260000	39544000	37592000	55042000	18779000	18597000	26939000	11333000	4973500	35277000	9431400	14022000	7	4	5	35	35	18.1	24.2	>sp|P16152|CBR1_HUMAN Carbonyl reductase [NADPH] 1 OS=Homo sapiens GN=CBR1 PE=1 SV=3;>sp|P16152-2|CBR1_HUMAN Isoform 2 of Carbonyl reductase [NADPH] 1 OS=Homo sapiens GN=CBR1;>tr|E9PQ63|E9PQ63_HUMAN Carbonyl reductase [NADPH] 1 OS=Homo sapiens GN=CBR1 PE=1
Proteasome subunit alpha type-1 OS	PSMA1	29.555	0.281418	-0.258277	0.0497701	-0.930683	0.10608	270	561280000	221220000	153600000	247740000	159820000	44945000	125160000	31427000	62072000	188380000	29978000	46581000	7	7	8	30	25.5	28.9	30	>sp|P25786|PSA1_HUMAN Proteasome subunit alpha type-1 OS=Homo sapiens GN=PSMA1 PE=1 SV=1;>sp|P25786-2|PSA1_HUMAN Isoform Long of Proteasome subunit alpha type-1 OS=Homo sapiens GN=PSMA1;>tr|V9HW55|V9HW55_HUMAN Epididymis secretory protein Li 275 OS=Homo sa
Putative uncharacterized protein (Fragment) OS		23.54	0.281334	0.253955	-0.0277632	0.913722	-0.124094	787	20278000	6699100	7599300	7980900	2534800	2740100	7272100	2078900	2986800	5025200	2085300	1872400	2	2	2	13.6	13.6	13.6	13.6	>tr|Q9BSK3|Q9BSK3_HUMAN Putative uncharacterized protein (Fragment) OS=Homo sapiens PE=1 SV=1;>tr|B4E0U0|B4E0U0_HUMAN cDNA FLJ61018, highly similar to Ran GTPase-activating protein 1 OS=Homo sapiens PE=2 SV=1;>tr|B4DY16|B4DY16_HUMAN cDNA FLJ51385, highly s
Acyl-CoA:lysophosphatidylglycerol acyltransferase 1 OS	LPGAT1	43.089	0.280926	0.142045	0.127765	0.470094	-0.171726	748	190990000	63319000	68521000	78396000	32493000	25090000	39725000	9002100	16322000	72866000	21824000	27109000	5	4	5	17.6	17.6	14.6	17.6	>sp|Q92604|LGAT1_HUMAN Acyl-CoA:lysophosphatidylglycerol acyltransferase 1 OS=Homo sapiens GN=LPGAT1 PE=2 SV=1
Isocitrate dehydrogenase [NADP] OS	HEL-S-26	46.659	0.280006	-0.477064	0.130931	-1.72614	0.164014	101	412730000	139650000	134870000	162130000	53168000	54531000	100530000	47228000	16653000	150070000	39250000	63684000	10	7	11	38.6	34.3	24.6	34.5	>tr|V9HWJ2|V9HWJ2_HUMAN Isocitrate dehydrogenase [NADP] OS=Homo sapiens GN=HEL-S-26 PE=2 SV=1;>tr|B2R5M8|B2R5M8_HUMAN Isocitrate dehydrogenase [NADP] OS=Homo sapiens PE=2 SV=1;>sp|O75874|IDHC_HUMAN Isocitrate dehydrogenase [NADP] cytoplasmic OS=Homo sapien
Heterogeneous nuclear ribonucleoprotein A3 OS	HNRNPA3	39.594	0.279303	-0.23164	-0.704724	0.335598	-0.325792	292	253110000	83972000	88474000	92190000	39339000	21520000	67485000	17313000	32602000	93435000	27321000	34352000	6	5	7	33.3	26.2	21.7	29.6	>sp|P51991|ROA3_HUMAN Heterogeneous nuclear ribonucleoprotein A3 OS=Homo sapiens GN=HNRNPA3 PE=1 SV=2;>tr|B4E3E6|B4E3E6_HUMAN cDNA FLJ58832, highly similar to Heterogeneous nuclear ribonucleoprotein A3 OS=Homo sapiens PE=2 SV=1;>tr|B4DDB6|B4DDB6_HUMAN Hete
Epididymis tissue sperm binding protein Li 3a OS		35.076	0.278439	-0.563138	0.180912	-2.04537	0.175045	59	722810000	264070000	225750000	324870000	108930000	118020000	192000000	105410000	30534000	205930000	49732000	77198000	10	11	8	62.1	40.1	47	28.1	>tr|E9KL35|E9KL35_HUMAN Epididymis tissue sperm binding protein Li 3a OS=Homo sapiens PE=2 SV=1;>sp|P63244|GBLP_HUMAN Guanine nucleotide-binding protein subunit beta-2-like 1 OS=Homo sapiens GN=GNB2L1 PE=1 SV=3;>tr|J3KPE3|J3KPE3_HUMAN Guanine nucleotide-bi
ATP-dependent 6-phosphofructokinase, platelet type OS	PFKP	85.595	0.278005	-0.688265	0.450591	-2.48068	-0.034707	24	198430000	68608000	58123000	56702000	18133000	21935000	66069000	32127000	9099000	75660000	18348000	27089000	8	8	9	24.4	17.1	14.8	17.2	>sp|Q01813|PFKAP_HUMAN ATP-dependent 6-phosphofructokinase, platelet type OS=Homo sapiens GN=PFKP PE=1 SV=2;>sp|Q01813-2|PFKAP_HUMAN Isoform 2 of ATP-dependent 6-phosphofructokinase, platelet type OS=Homo sapiens GN=PFKP;>tr|Q8WTZ9|Q8WTZ9_HUMAN Similar to
L-lactate dehydrogenase OS	LDHB	36.638	0.277157	-0.470077	0.139208	-1.71255	0.163112	110	1221300000	410530000	395680000	596730000	217820000	208890000	228090000	103670000	42566000	396450000	89045000	144230000	6	4	6	45.8	39.8	42.2	45.2	>tr|Q5U077|Q5U077_HUMAN L-lactate dehydrogenase OS=Homo sapiens GN=LDHB PE=2 SV=1;>sp|P07195|LDHB_HUMAN L-lactate dehydrogenase B chain OS=Homo sapiens GN=LDHB PE=1 SV=2;>tr|A8MW50|A8MW50_HUMAN L-lactate dehydrogenase (Fragment) OS=Homo sapiens GN=LDHB PE=
Solute carrier family 25, member 13 (Citrin) variant (Fragment) OS		74.116	0.276546	0.103631	0.0756011	0.354114	-0.118821	721	420020000	125460000	151470000	161750000	56362000	53030000	113830000	26703000	44489000	144430000	42393000	53949000	12	13	12	32	27.6	28.7	28.4	>tr|Q53GR7|Q53GR7_HUMAN Solute carrier family 25, member 13 (Citrin) variant (Fragment) OS=Homo sapiens PE=2 SV=1;>sp|Q9UJS0|CMC2_HUMAN Calcium-binding mitochondrial carrier protein Aralar2 OS=Homo sapiens GN=SLC25A13 PE=1 SV=2;>sp|Q9UJS0-2|CMC2_HUMAN Isof
cDNA FLJ77762, highly similar to Homo sapiens cullin-associated and neddylation-dissociated 1 (CAND1), mRNA OS		136.32	0.276219	-0.353281	0.0392789	-1.28613	0.187008	185	348500000	113850000	113690000	158210000	55983000	54370000	48582000	20788000	10574000	141710000	37078000	48747000	12	9	15	16.5	12	9.5	15.5	>tr|A8K8U1|A8K8U1_HUMAN cDNA FLJ77762, highly similar to Homo sapiens cullin-associated and neddylation-dissociated 1 (CAND1), mRNA OS=Homo sapiens PE=2 SV=1;>sp|Q86VP6|CAND1_HUMAN Cullin-associated NEDD8-dissociated protein 1 OS=Homo sapiens GN=CAND1 PE=1
Chaperonin containing TCP1, subunit 2 (Beta), isoform CRA	HEL-S-100n	57.488	0.275489	-0.360175	0.0750534	-1.31624	0.160662	179	1196200000	404940000	363530000	433600000	149730000	149260000	422530000	169160000	93564000	340090000	86046000	120700000	14	14	12	42.1	39.3	41.9	33.3	>tr|V9HW96|V9HW96_HUMAN Chaperonin containing TCP1, subunit 2 (Beta), isoform CRA_b OS=Homo sapiens GN=HEL-S-100n PE=2 SV=1;>sp|P78371|TCPB_HUMAN T-complex protein 1 subunit beta OS=Homo sapiens GN=CCT2 PE=1 SV=4;>tr|F5GWF6|F5GWF6_HUMAN T-complex protein 1
Phosphatidate cytidylyltransferase OS		51.357	0.275071	0.22534	-0.222364	0.794852	0.103531	780	59433000	17920000	21037000	31157000	10918000	9676600	15041000	3482700	5758200	13235000	3519100	5602500	3	2	2	15.1	15.1	11.2	11.2	>tr|B3KNK4|B3KNK4_HUMAN Phosphatidate cytidylyltransferase OS=Homo sapiens PE=2 SV=1;>tr|B3KM95|B3KM95_HUMAN Phosphatidate cytidylyltransferase OS=Homo sapiens PE=2 SV=1;>sp|O95674|CDS2_HUMAN Phosphatidate cytidylyltransferase 2 OS=Homo sapiens GN=CDS2 PE=
cDNA, FLJ79396, highly similar to Phenylalanyl-tRNA synthetase beta chain (EC 6.1.1.20) OS		54.814	0.274768	-0.406288	0.200504	-1.48604	0.0666747	156	68108000	23505000	21139000	29856000	10283000	9625100	16746000	7490800	4082500	21505000	5731000	7431900	4	4	4	11	8.6	8.6	8.6	>tr|B7ZB32|B7ZB32_HUMAN cDNA, FLJ79396, highly similar to Phenylalanyl-tRNA synthetase beta chain (EC 6.1.1.20) OS=Homo sapiens PE=2 SV=1;>sp|Q9NSD9-2|SYFB_HUMAN Isoform 2 of Phenylalanine--tRNA ligase beta subunit OS=Homo sapiens GN=FARSB;>tr|Q9BR63|Q9BR6
Ribosomal protein S9, isoform CRA	RPS9	22.591	0.274552	-0.29171	0.232415	-1.05146	-0.0560861	239	1001100000	340410000	326880000	392400000	128320000	134630000	282170000	116150000	67031000	326510000	95937000	125210000	6	6	8	26.8	22.2	22.2	26.8	>tr|A0A024R4M0|A0A024R4M0_HUMAN Ribosomal protein S9, isoform CRA_a OS=Homo sapiens GN=RPS9 PE=3 SV=1;>sp|P46781|RS9_HUMAN 40S ribosomal protein S9 OS=Homo sapiens GN=RPS9 PE=1 SV=3;>tr|A5D904|A5D904_HUMAN RPS9 protein (Fragment) OS=Homo sapiens GN=RPS9 PE
Isoform Short of Ubiquitin carboxyl-terminal hydrolase 5 OS	USP5	93.307	0.274084	-0.318416	0.103128	-1.16874	0.110363	215	71539000	23468000	23139000	29960000	11689000	9700500	11394000	4407600	2731400	30184000	7371100	10707000	6	3	8	15.4	11.3	5.5	15.4	>sp|P45974-2|UBP5_HUMAN Isoform Short of Ubiquitin carboxyl-terminal hydrolase 5 OS=Homo sapiens GN=USP5;>sp|P45974|UBP5_HUMAN Ubiquitin carboxyl-terminal hydrolase 5 OS=Homo sapiens GN=USP5 PE=1 SV=2
Pyridoxal kinase (Fragment) OS	PDXK	18.967	0.273792	-0.600861	0.168129	-2.20656	0.23585	43	49473000	18434000	12645000	15768000	4697600	4958100	21126000	10738000	2995600	12579000	2998800	4691400	2	3	2	25.3	19.3	25.3	19.3	>tr|G1UI32|G1UI32_HUMAN Pyridoxal kinase (Fragment) OS=Homo sapiens GN=PDXK PE=2 SV=1;>tr|V9HWC3|V9HWC3_HUMAN Epididymis secretory sperm binding protein Li 1a OS=Homo sapiens GN=HEL-S-1a PE=2 SV=1;>sp|O00764|PDXK_HUMAN Pyridoxal kinase OS=Homo sapiens GN=P
Ribosomal protein P0 variant (Fragment) OS		34.301	0.273726	-0.327313	0.2444	-1.18698	-0.0393549	205	273520000	92089000	85998000	127760000	40066000	42157000	71763000	28460000	15082000	73997000	23562000	28758000	7	6	7	47	35	24.6	36	>tr|Q53HW2|Q53HW2_HUMAN Ribosomal protein P0 variant (Fragment) OS=Homo sapiens PE=2 SV=1;>tr|A8K4Z4|A8K4Z4_HUMAN cDNA FLJ75549, highly similar to Homo sapiens ribosomal protein, large, P0 (RPLP0), transcript variant 1, mRNA OS=Homo sapiens PE=2 SV=1;>tr|A
Malectin OS	MLEC	32.233	0.27272	0.0723834	0.118227	0.212881	-0.113957	684	130080000	41586000	43043000	63048000	20312000	18702000	32718000	10462000	10985000	34314000	10811000	13356000	5	5	4	27.1	19.2	22.6	14.7	>sp|Q14165|MLEC_HUMAN Malectin OS=Homo sapiens GN=MLEC PE=1 SV=1;>tr|F5H1S8|F5H1S8_HUMAN Malectin (Fragment) OS=Homo sapiens GN=MLEC PE=1 SV=1;>tr|F5GX14|F5GX14_HUMAN Malectin OS=Homo sapiens GN=MLEC PE=1 SV=1
cDNA FLJ60792, highly similar to Probable ribosome biogenesis protein NEP1 OS		24.329	0.272597	-0.142073	-0.442889	-0.194592	0.211261	380	45225000	14928000	14999000	18980000	7709700	5889700	12118000	3366100	3870500	14126000	3851800	5238600	2	2	2	10.8	10.8	10.8	10.8	>tr|B4DQC7|B4DQC7_HUMAN cDNA FLJ60792, highly similar to Probable ribosome biogenesis protein NEP1 OS=Homo sapiens PE=2 SV=1;>tr|A8K6D2|A8K6D2_HUMAN cDNA FLJ76620, highly similar to Homo sapiens C2f protein (C2F), mRNA OS=Homo sapiens PE=2 SV=1;>sp|Q92979|
T-complex protein 1 subunit alpha OS	TCP1	60.343	0.271736	-0.357384	0.0781998	-1.31797	0.167615	181	673510000	227680000	205830000	326120000	117120000	100000000	162510000	63738000	34197000	184880000	46827000	71630000	15	13	13	39.7	37.9	31.3	32	>sp|P17987|TCPA_HUMAN T-complex protein 1 subunit alpha OS=Homo sapiens GN=TCP1 PE=1 SV=1;>tr|E7ERF2|E7ERF2_HUMAN T-complex protein 1 subunit alpha OS=Homo sapiens GN=TCP1 PE=1 SV=1;>tr|E7EQR6|E7EQR6_HUMAN T-complex protein 1 subunit alpha OS=Homo sapiens
Elongation factor 1-alpha OS	EEF1A1L14	43.024	0.270961	-0.462345	0.0304067	-1.70148	0.28404	117	440540000	151140000	135960000	173160000	54830000	55244000	134950000	69882000	20267000	132430000	26429000	60451000	7	7	7	36.2	35.2	36.2	35.2	>tr|Q96RE1|Q96RE1_HUMAN Elongation factor 1-alpha OS=Homo sapiens GN=EEF1A1L14 PE=2 SV=1;>tr|Q6IPT9|Q6IPT9_HUMAN Elongation factor 1-alpha OS=Homo sapiens GN=EEF1A1 PE=2 SV=1;>tr|Q6IPS9|Q6IPS9_HUMAN Elongation factor 1-alpha OS=Homo sapiens GN=EEF1A1 PE=2
STIM1 OS	STIM1	77.406	0.270843	-0.284018	-0.61352	0.480369	-0.718901	243.5	146610000	60376000	44346000	63845000	31197000	14019000	24750000	6499100	12100000	58014000	22680000	18227000	9	6	8	22.9	21.5	16.1	19.9	>tr|V5J3L2|V5J3L2_HUMAN STIM1 OS=Homo sapiens GN=STIM1 PE=2 SV=1;>sp|Q13586|STIM1_HUMAN Stromal interaction molecule 1 OS=Homo sapiens GN=STIM1 PE=1 SV=3;>tr|G0XQ39|G0XQ39_HUMAN STIM1L OS=Homo sapiens GN=STIM1 PE=2 SV=1;>sp|Q13586-2|STIM1_HUMAN Isoform 2 o
cDNA FLJ54526, highly similar to 5-3 exoribonuclease 2 (EC 3.1.11.-) OS		99.95	0.270515	-0.410517	-1.2056	0.657274	-0.683229	151	93556000	37094000	28649000	41624000	20133000	8157900	20811000	5856100	10727000	31122000	11104000	9764100	5	3	4	11.7	10.3	7.2	8.6	>tr|B4E0B9|B4E0B9_HUMAN cDNA FLJ54526, highly similar to 5-3 exoribonuclease 2 (EC 3.1.11.-) OS=Homo sapiens PE=2 SV=1;>sp|Q9H0D6-2|XRN2_HUMAN Isoform 2 of 5-3 exoribonuclease 2 OS=Homo sapiens GN=XRN2;>tr|B4DZC3|B4DZC3_HUMAN cDNA FLJ55645, highly simi
Epididymis luminal protein 4 OS	YWHAZ	27.745	0.270423	-0.386427	0.194717	-1.42892	0.0749164	163	720950000	238690000	224950000	247540000	82699000	90112000	237680000	96947000	46139000	235720000	59044000	88696000	5	7	6	47.3	42.9	38	47.3	>tr|D0PNI1|D0PNI1_HUMAN Epididymis luminal protein 4 OS=Homo sapiens GN=YWHAZ PE=2 SV=1;>sp|P63104|1433Z_HUMAN 14-3-3 protein zeta/delta OS=Homo sapiens GN=YWHAZ PE=1 SV=1;>tr|B0AZS6|B0AZS6_HUMAN 14-3-3 protein zeta/delta OS=Homo sapiens GN=YWHAZ PE=1 SV=1
Ribonuclease/angiogenin inhibitor 1, isoform CRA	RNH1	49.416	0.270346	-0.130894	0.00201835	-0.481485	0.0867838	391	62721000	22907000	17558000	30556000	10864000	9369200	23334000	9369400	5052100	8830900	2673600	3136800	4	2	3	17.1	13.8	6.6	9.9	>tr|A0A024RC87|A0A024RC87_HUMAN Ribonuclease/angiogenin inhibitor 1, isoform CRA_a OS=Homo sapiens GN=RNH1 PE=4 SV=1;>sp|P13489|RINI_HUMAN Ribonuclease inhibitor OS=Homo sapiens GN=RNH1 PE=1 SV=2;>tr|E9PMJ3|E9PMJ3_HUMAN Ribonuclease inhibitor (Fragment) OS
Isoform 2 of Pyruvate dehydrogenase E1 component subunit beta, mitochondrial OS	PDHB	37.2	0.269973	0.0593365	-0.10132	0.137635	0.141694	670	753740000	238620000	262070000	288010000	102230000	99992000	233290000	67577000	69440000	232440000	68811000	92642000	9	9	9	35.8	35.8	35.8	35.8	>sp|P11177-2|ODPB_HUMAN Isoform 2 of Pyruvate dehydrogenase E1 component subunit beta, mitochondrial OS=Homo sapiens GN=PDHB;>sp|P11177|ODPB_HUMAN Pyruvate dehydrogenase E1 component subunit beta, mitochondrial OS=Homo sapiens GN=PDHB PE=1 SV=3;>sp|P11177-
Nuclear pore complex protein Nup155 OS	NUP155	148.09	0.269649	-0.140497	-0.429226	0.218967	-0.211231	382	114090000	39791000	37767000	52932000	19940000	12898000	18377000	5846300	7091000	42782000	14005000	17778000	10	7	12	13.2	10.8	8	12.5	>tr|E9PF10|E9PF10_HUMAN Nuclear pore complex protein Nup155 OS=Homo sapiens GN=NUP155 PE=1 SV=1;>sp|O75694-2|NU155_HUMAN Isoform 2 of Nuclear pore complex protein Nup155 OS=Homo sapiens GN=NUP155;>tr|B4DLT2|B4DLT2_HUMAN cDNA FLJ56637, highly similar to Nuc
Isoform 2 of Ras-related protein Rab-2A OS	RAB2A	20.847	0.269055	0.0603219	0.222063	0.00216244	-0.0432593	673	197900000	55303000	73835000	92186000	27918000	28026000	37463000	10412000	13365000	68251000	16972000	32444000	4	3	4	29.3	29.3	21.8	29.3	>sp|P61019-2|RAB2A_HUMAN Isoform 2 of Ras-related protein Rab-2A OS=Homo sapiens GN=RAB2A;>tr|A0A024R7V6|A0A024R7V6_HUMAN RAB2, member RAS oncogene family, isoform CRA_a OS=Homo sapiens GN=RAB2 PE=3 SV=1;>sp|P61019|RAB2A_HUMAN Ras-related protein Rab-2A OS
B-cell receptor-associated protein 31 variant (Fragment) OS		27.961	0.268331	0.0946152	0.287472	0.146134	-0.149761	712	778680000	228370000	291890000	324950000	102070000	115940000	224020000	57307000	81251000	229710000	68995000	94703000	6	6	6	26.4	26.4	26.4	26.4	>tr|Q53HT6|Q53HT6_HUMAN B-cell receptor-associated protein 31 variant (Fragment) OS=Homo sapiens PE=2 SV=1;>tr|Q53G72|Q53G72_HUMAN B-cell receptor-associated protein 31 variant (Fragment) OS=Homo sapiens PE=2 SV=1;>sp|P51572|BAP31_HUMAN B-cell receptor-ass
Cofilin-1 (Fragment) OS	CFL1	17.865	0.267959	-0.455433	0.0775164	-1.6932	0.249385	122	155540000	51357000	50791000	53752000	17659000	18302000	43306000	18830000	8033800	58480000	14868000	24455000	3	3	3	34.4	34.4	34.4	34.4	>tr|E9PP50|E9PP50_HUMAN Cofilin-1 (Fragment) OS=Homo sapiens GN=CFL1 PE=1 SV=3;>tr|V9HWI5|V9HWI5_HUMAN Cofilin 1 (Non-muscle), isoform CRA_b OS=Homo sapiens GN=HEL-S-15 PE=2 SV=1;>sp|P23528|COF1_HUMAN Cofilin-1 OS=Homo sapiens GN=CFL1 PE=1 SV=3;>tr|B4E112|
Monoacylglycerol lipase ABHD12 OS	ABHD12	45.096	0.267765	0.13049	-0.0965144	0.481506	0.00647761	735	112920000	33883000	41774000	48301000	16742000	16683000	35089000	8604000	13756000	29534000	8537700	11336000	7	7	5	29.6	24.4	24.4	13.3	>sp|Q8N2K0|ABD12_HUMAN Monoacylglycerol lipase ABHD12 OS=Homo sapiens GN=ABHD12 PE=1 SV=2;>sp|Q8N2K0-2|ABD12_HUMAN Isoform 2 of Monoacylglycerol lipase ABHD12 OS=Homo sapiens GN=ABHD12;>sp|Q8N2K0-3|ABD12_HUMAN Isoform 3 of Monoacylglycerol lipase ABHD12 OS
Procollagen galactosyltransferase 1 OS	COLGALT1	71.635	0.264763	-0.0940199	0.156267	-0.160863	-0.277464	432	439180000	143460000	160670000	192530000	64531000	66503000	121550000	37228000	42142000	125100000	41705000	52029000	7	8	5	15.6	13.2	15.6	8.8	>sp|Q8NBJ5|GT251_HUMAN Procollagen galactosyltransferase 1 OS=Homo sapiens GN=COLGALT1 PE=1 SV=1
Mycophenolic acid acyl-glucuronide esterase, mitochondrial OS	ABHD10	33.932	0.263217	0.0924321	0.341986	-0.0824689	0.0177795	709	46721000	13825000	18853000	18657000	5963500	6517200	12632000	3272100	5009500	15432000	4589800	7326600	2	2	2	11.4	11.4	11.4	11.4	>sp|Q9NUJ1|ABHDA_HUMAN Mycophenolic acid acyl-glucuronide esterase, mitochondrial OS=Homo sapiens GN=ABHD10 PE=1 SV=1;>sp|Q9NUJ1-2|ABHDA_HUMAN Isoform 2 of Mycophenolic acid acyl-glucuronide esterase, mitochondrial OS=Homo sapiens GN=ABHD10;>sp|Q9NUJ1-3|AB
RuvB-like 1 (Fragment) OS	RUVBL1	50.215	0.260206	-0.276129	0.151339	-1.04805	0.0683268	255	279160000	95802000	87853000	112050000	41964000	35168000	80020000	31185000	20406000	87087000	22653000	32279000	10	10	8	36.2	33.1	32.5	25.9	>tr|B5BUB1|B5BUB1_HUMAN RuvB-like 1 (Fragment) OS=Homo sapiens GN=RUVBL1 PE=2 SV=1;>sp|Q9Y265|RUVB1_HUMAN RuvB-like 1 OS=Homo sapiens GN=RUVBL1 PE=1 SV=1;>sp|Q9Y265-2|RUVB1_HUMAN Isoform 2 of RuvB-like 1 OS=Homo sapiens GN=RUVBL1;>tr|E7ETR0|E7ETR0_HUMAN Ru
Isoform 2 of Adipocyte plasma membrane-associated protein OS	APMAP	32.161	0.258522	0.0655839	0.244887	0.014641	-0.0627762	675	187010000	59563000	64464000	66439000	22273000	23723000	66936000	20765000	19396000	53634000	16524000	21345000	3	4	3	19.7	10.4	19.7	10.4	>sp|Q9HDC9-2|APMAP_HUMAN Isoform 2 of Adipocyte plasma membrane-associated protein OS=Homo sapiens GN=APMAP;>tr|H0Y512|H0Y512_HUMAN Adipocyte plasma membrane-associated protein (Fragment) OS=Homo sapiens GN=APMAP PE=1 SV=1;>sp|Q9HDC9|APMAP_HUMAN Adipocyte
3-hydroxymethyl-3-methylglutaryl-Coenzyme A lyase (Hydroxymethylglutaricaciduria), isoform CRA	HMGCL	31.735	0.257023	0.148336	-0.248039	0.46728	0.225768	752	36922000	11330000	12949000	15288000	6078200	4110000	13691000	3520700	5640700	7942400	1730800	3198400	3	4	2	17.7	13	17.7	8.7	>tr|B1AK13|B1AK13_HUMAN 3-hydroxymethyl-3-methylglutaryl-Coenzyme A lyase (Hydroxymethylglutaricaciduria), isoform CRA_b OS=Homo sapiens GN=HMGCL PE=2 SV=1;>sp|P35914|HMGCL_HUMAN Hydroxymethylglutaryl-CoA lyase, mitochondrial OS=Homo sapiens GN=HMGCL PE=1
Quinone oxidoreductase OS	CRYZ	35.206	0.256781	-0.0805995	-0.0863082	-0.275577	0.120086	453	1081800000	357390000	376820000	477180000	181780000	150170000	292460000	90250000	98013000	312120000	85361000	128640000	10	9	10	47.4	47.4	43.2	47.4	>sp|Q08257|QOR_HUMAN Quinone oxidoreductase OS=Homo sapiens GN=CRYZ PE=1 SV=1;>sp|Q08257-3|QOR_HUMAN Isoform 3 of Quinone oxidoreductase OS=Homo sapiens GN=CRYZ;>tr|A6NP24|A6NP24_HUMAN Quinone oxidoreductase (Fragment) OS=Homo sapiens GN=CRYZ PE=1 SV=1;>tr
Casein kinase 2 alpha isoform OS		45.28	0.256493	-0.211022	0.383939	-0.449237	-0.567767	308	40237000	13601000	12537000	10153000	3786700	3537100	19078000	6639600	5703400	11006000	3174700	3296700	3	2	2	12.5	10.6	7.3	5.7	>tr|Q2I0Y7|Q2I0Y7_HUMAN Casein kinase 2 alpha isoform OS=Homo sapiens PE=1 SV=1;>tr|E7EU96|E7EU96_HUMAN Casein kinase II subunit alpha OS=Homo sapiens GN=CSNK2A1 PE=1 SV=1;>tr|B5BUH5|B5BUH5_HUMAN Casein kinase II alpha 1 subunit isoform a (Fragment) OS=Hom
RPS4X protein (Fragment) OS	RPS4X	27.259	0.255507	-0.282715	0.221073	-1.07856	0.00934718	246	1142200000	345930000	438970000	554730000	160360000	245260000	234000000	91478000	52787000	353470000	94089000	140930000	12	11	12	49.8	49.8	45.3	49.8	>tr|Q96IR1|Q96IR1_HUMAN RPS4X protein (Fragment) OS=Homo sapiens GN=RPS4X PE=2 SV=2;>tr|B2R491|B2R491_HUMAN 40S ribosomal protein S4 OS=Homo sapiens GN=RPS4X PE=2 SV=1;>sp|P62701|RS4X_HUMAN 40S ribosomal protein S4, X isoform OS=Homo sapiens GN=RPS4X PE=1
cDNA FLJ13058 fis, clone NT2RP3001587, highly similar to Ubiquitin-like 1-activating enzyme E1B OS		71.161	0.254366	-0.316952	-0.210696	-1.14963	0.409472	218	144840000	48657000	45521000	65901000	21821000	21311000	42096000	17952000	8847600	36844000	8883800	15362000	7	5	4	23.3	20.9	10.5	6.6	>tr|B3KMZ6|B3KMZ6_HUMAN cDNA FLJ13058 fis, clone NT2RP3001587, highly similar to Ubiquitin-like 1-activating enzyme E1B OS=Homo sapiens PE=2 SV=1;>tr|B2RDF5|B2RDF5_HUMAN cDNA, FLJ96587, highly similar to Homo sapiens SUMO-1 activating enzyme subunit 2 (UBA
Isoform 3 of Bcl-2-associated transcription factor 1 OS	BCLAF1	100.23	0.253208	-0.46452	-1.5861	0.721679	-0.529135	116	45620000	15620000	16635000	8774500	4567800	1516600	22406000	7025400	10894000	14439000	4026600	4223800	1	5	3	6.9	1.5	6.9	5.4	>sp|Q9NYF8-3|BCLF1_HUMAN Isoform 3 of Bcl-2-associated transcription factor 1 OS=Homo sapiens GN=BCLAF1;>tr|E9PK91|E9PK91_HUMAN Bcl-2-associated transcription factor 1 OS=Homo sapiens GN=BCLAF1 PE=1 SV=1;>sp|Q9NYF8-2|BCLF1_HUMAN Isoform 2 of Bcl-2-associat
Peroxisomal trans-2-enoyl-CoA reductase OS	PECR	32.544	0.253061	0.130955	-0.244207	0.293606	0.343465	736	82562000	25371000	31871000	39736000	14385000	14038000	23857000	6682300	10018000	18969000	4304300	7814500	4	4	4	26.1	21.8	21.5	21.5	>sp|Q9BY49|PECR_HUMAN Peroxisomal trans-2-enoyl-CoA reductase OS=Homo sapiens GN=PECR PE=1 SV=2;>tr|B4DJS2|B4DJS2_HUMAN Peroxisomal trans-2-enoyl-CoA reductase OS=Homo sapiens GN=PECR PE=2 SV=1
Heterogeneous nuclear ribonucleoprotein H2 OS	HNRNPH2	49.263	0.252623	-0.315699	-0.057767	0.309758	-1.19909	219	117130000	42672000	42274000	44874000	17973000	15914000	31706000	8482100	14960000	40549000	16218000	11400000	2	2	2	20.5	20.5	20.5	20.5	>sp|P55795|HNRH2_HUMAN Heterogeneous nuclear ribonucleoprotein H2 OS=Homo sapiens GN=HNRNPH2 PE=1 SV=1;>tr|B4DFK9|B4DFK9_HUMAN cDNA FLJ57964, highly similar to Heterogeneous nuclear ribonucleoprotein H OS=Homo sapiens PE=2 SV=1
Transmembrane protein 164 OS	RP13-360B22.2	29.231	0.252294	0.439789	-0.239328	1.7058	-0.147106	817	45694000	13510000	18460000	17780000	7938600	5617700	13135000	2178100	8148000	14780000	3393700	4694600	2	2	2	8.5	8.5	8.5	8.5	>tr|Q9H617|Q9H617_HUMAN Transmembrane protein 164 OS=Homo sapiens GN=RP13-360B22.2 PE=2 SV=1;>sp|Q5U3C3|TM164_HUMAN Transmembrane protein 164 OS=Homo sapiens GN=TMEM164 PE=2 SV=1
Phosphate carrier protein, mitochondrial OS	SLC25A3	36.161	0.251065	0.0713846	0.0350608	0.265677	-0.086584	683	2581700000	813660000	943060000	1161000000	422420000	380090000	620610000	160050000	244140000	800050000	231180000	318820000	8	8	8	24.1	24.1	24.1	24.1	>tr|F8VVM2|F8VVM2_HUMAN Phosphate carrier protein, mitochondrial OS=Homo sapiens GN=SLC25A3 PE=1 SV=1;>tr|Q8NCF7|Q8NCF7_HUMAN cDNA FLJ90278 fis, clone NT2RP1000325, highly similar to Phosphate carrier protein, mitochondrialprecursor OS=Homo sapiens PE=2 SV
cDNA, FLJ94557, highly similar to Homo sapiens FK506 binding protein 4, 59kDa (FKBP4), mRNA OS		51.834	0.250793	-0.445217	0.259182	-1.73312	0.13829	129	116850000	40721000	35085000	45925000	14233000	15105000	33898000	16945000	5725200	37030000	9543200	14255000	6	5	7	20.9	17.2	13.3	20.9	>tr|B2R9U2|B2R9U2_HUMAN cDNA, FLJ94557, highly similar to Homo sapiens FK506 binding protein 4, 59kDa (FKBP4), mRNA OS=Homo sapiens PE=2 SV=1;>sp|Q02790|FKBP4_HUMAN Peptidyl-prolyl cis-trans isomerase FKBP4 OS=Homo sapiens GN=FKBP4 PE=1 SV=3
Immediate early response 3-interacting protein 1 OS	IER3IP1	8.9687	0.250541	-0.0443739	0.0798389	-0.135554	-0.0774063	520	77233000	25272000	26398000	30822000	10973000	9535600	21864000	6932600	6791000	24547000	7367100	10071000	2	2	2	34.1	34.1	34.1	34.1	>sp|Q9Y5U9|IR3IP_HUMAN Immediate early response 3-interacting protein 1 OS=Homo sapiens GN=IER3IP1 PE=1 SV=1
Eukaryotic translation initiation factor 5A-1 (Fragment) OS	EIF5A	16.118	0.250395	-0.420507	0.0942361	-1.63576	0.280006	143	190030000	68317000	60347000	84309000	28271000	32938000	62495000	29927000	10390000	43230000	10118000	17019000	4	4	4	46.3	46.3	46.3	46.3	>tr|I3L397|I3L397_HUMAN Eukaryotic translation initiation factor 5A-1 (Fragment) OS=Homo sapiens GN=EIF5A PE=1 SV=3;>sp|P63241|IF5A1_HUMAN Eukaryotic translation initiation factor 5A-1 OS=Homo sapiens GN=EIF5A PE=1 SV=2;>tr|I3L504|I3L504_HUMAN Eukaryotic t
cDNA, FLJ92657, highly similar to Homo sapiens heterogeneous nuclear ribonucleoprotein C (C1/C2) (HNRPC), transcript variant 2, mRNA OS		31.948	0.249698	0.354532	0.429214	1.20789	-0.57351	807	267170000	80431000	112580000	116540000	39355000	42142000	100830000	19488000	50807000	49798000	21588000	19626000	7	6	5	40.3	27.2	23.4	29.7	>tr|B2R5W2|B2R5W2_HUMAN cDNA, FLJ92657, highly similar to Homo sapiens heterogeneous nuclear ribonucleoprotein C (C1/C2) (HNRPC), transcript variant 2, mRNA OS=Homo sapiens PE=2 SV=1;>tr|G3V4C1|G3V4C1_HUMAN Heterogeneous nuclear ribonucleoproteins C1/C2 OS
Estradiol 17-beta-dehydrogenase 11 OS	HSD17B11	28.102	0.249673	0.104853	-0.117287	0.396927	0.03492	722	103960000	34687000	35757000	49910000	20349000	14835000	29456000	8009800	11350000	24592000	6327700	9571900	3	4	3	19.1	16	19.1	16	>tr|D6RCD0|D6RCD0_HUMAN Estradiol 17-beta-dehydrogenase 11 OS=Homo sapiens GN=HSD17B11 PE=1 SV=2;>sp|Q8NBQ5|DHB11_HUMAN Estradiol 17-beta-dehydrogenase 11 OS=Homo sapiens GN=HSD17B11 PE=1 SV=3
Putative uncharacterized protein UGP2 (Fragment) OS	UGP2	49.221	0.249145	-0.299089	0.172103	-1.16981	0.10044	233	62882000	22274000	17923000	11697000	4806400	3623600	29360000	13044000	6709300	21824000	4423400	7589900	2	3	3	14.6	7.3	10.5	11.9	>tr|Q53QE9|Q53QE9_HUMAN Putative uncharacterized protein UGP2 (Fragment) OS=Homo sapiens GN=UGP2 PE=4 SV=1;>sp|Q16851-2|UGPA_HUMAN Isoform 2 of UTP--glucose-1-phosphate uridylyltransferase OS=Homo sapiens GN=UGP2;>tr|B2RAN1|B2RAN1_HUMAN cDNA, FLJ95012, hig
Spermidine synthase OS	SRM	33.824	0.247533	-0.211652	0.0236102	-0.826565	0.168	307	27577000	9607000	8767700	12865000	4495600	4337200	6151900	2481200	1235000	8560200	2630300	3195500	3	2	3	15.6	15.6	7.6	15.6	>sp|P19623|SPEE_HUMAN Spermidine synthase OS=Homo sapiens GN=SRM PE=1 SV=1;>tr|K7EL89|K7EL89_HUMAN Spermidine synthase (Fragment) OS=Homo sapiens GN=SRM PE=1 SV=1
Isoform 4 of Hexokinase-1 OS	HK1	101.08	0.247007	-0.17238	0.316146	-0.532074	-0.301213	350	1979600000	656350000	688770000	788920000	238680000	275740000	515450000	178060000	140570000	675230000	239610000	272450000	25	24	25	33.1	31.8	30.5	32.2	>sp|P19367-4|HXK1_HUMAN Isoform 4 of Hexokinase-1 OS=Homo sapiens GN=HK1;>tr|B4DG62|B4DG62_HUMAN cDNA FLJ56506, highly similar to Hexokinase-1 (EC 2.7.1.1) OS=Homo sapiens PE=2 SV=1;>sp|P19367-2|HXK1_HUMAN Isoform 2 of Hexokinase-1 OS=Homo sapiens GN=HK1;>
Heterogeneous nuclear ribonucleoprotein A0 OS	HNRNPA0	30.84	0.245834	-0.152034	-0.49824	0.268075	-0.225936	368	73019000	23988000	25431000	26195000	10209000	7004000	24168000	7319700	10425000	22656000	6459900	8001600	2	3	2	24.6	14.1	24.6	14.1	>sp|Q13151|ROA0_HUMAN Heterogeneous nuclear ribonucleoprotein A0 OS=Homo sapiens GN=HNRNPA0 PE=1 SV=1
14-3-3 protein theta OS	YWHAQ	27.764	0.245691	-0.379793	0.260508	-1.49696	0.0970713	166	375040000	135030000	106780000	124640000	41919000	44828000	149500000	67003000	22378000	100910000	26107000	39579000	6	6	6	40	40	40	40	>sp|P27348|1433T_HUMAN 14-3-3 protein theta OS=Homo sapiens GN=YWHAQ PE=1 SV=1;>tr|Q53S41|Q53S41_HUMAN Putative uncharacterized protein YWHAQ (Fragment) OS=Homo sapiens GN=YWHAQ PE=4 SV=1;>tr|B4DMT8|B4DMT8_HUMAN cDNA FLJ52118, highly similar to 14-3-3 prot
Ribosomal protein L5, isoform CRA	RPL5	28.044	0.244452	-0.322459	0.276437	-1.26757	0.0237522	211	541770000	179060000	187440000	259680000	77621000	97955000	115360000	52149000	24330000	166730000	49296000	65157000	7	6	6	29.1	29.1	26.3	26.3	>tr|B3KTM6|B3KTM6_HUMAN Ribosomal protein L5, isoform CRA_b OS=Homo sapiens GN=RPL5 PE=2 SV=1;>tr|A2RUM7|A2RUM7_HUMAN Ribosomal protein L5 OS=Homo sapiens GN=RPL5 PE=2 SV=1;>sp|P46777|RL5_HUMAN 60S ribosomal protein L5 OS=Homo sapiens GN=RPL5 PE=1 SV=3;>tr
40S ribosomal protein S17-like OS	RPS17L	15.55	0.243055	-0.407004	0.190804	-1.62033	0.208517	154	367290000	122780000	114330000	138040000	44023000	47107000	112550000	49177000	22318000	116700000	29575000	44901000	4	4	3	42.2	42.2	42.2	41.5	>sp|P0CW22|RS17L_HUMAN 40S ribosomal protein S17-like OS=Homo sapiens GN=RPS17L PE=1 SV=1;>sp|P08708|RS17_HUMAN 40S ribosomal protein S17 OS=Homo sapiens GN=RPS17 PE=1 SV=2;>tr|H0YN88|H0YN88_HUMAN 40S ribosomal protein S17 OS=Homo sapiens GN=RPS17 PE=3 SV=
GrpE protein homolog 1, mitochondrial OS	GRPEL1	24.279	0.242165	0.100254	0.312781	-0.189236	0.177216	718	38970000	12183000	14113000	18331000	5920100	6647200	10725000	3422400	3117800	9913700	2840100	4348200	3	2	2	17.5	17.5	12.4	12.4	>sp|Q9HAV7|GRPE1_HUMAN GrpE protein homolog 1, mitochondrial OS=Homo sapiens GN=GRPEL1 PE=1 SV=2;>tr|B4DWV5|B4DWV5_HUMAN GrpE protein homolog OS=Homo sapiens PE=2 SV=1
Isoform 2 of Kinectin OS	KTN1	149.61	0.241745	-0.280273	-0.501198	0.531768	-0.87139	250	519540000	195020000	175360000	198670000	81434000	54433000	129630000	37424000	59051000	191240000	76164000	61876000	18	18	18	25.8	19.4	19.7	21.2	>sp|Q86UP2-2|KTN1_HUMAN Isoform 2 of Kinectin OS=Homo sapiens GN=KTN1;>sp|Q86UP2-4|KTN1_HUMAN Isoform 4 of Kinectin OS=Homo sapiens GN=KTN1;>tr|A0A024R663|A0A024R663_HUMAN Kinectin 1 (Kinesin receptor), isoform CRA_a OS=Homo sapiens GN=KTN1 PE=4 SV=1;>sp|Q
T-complex protein 1 subunit gamma OS		57.945	0.24129	-0.257014	0.06226	-1.02474	0.191436	271	432120000	133800000	147700000	167340000	54229000	62544000	151690000	50679000	45352000	113080000	28897000	39800000	11	9	9	30.3	27.4	25.9	20.5	>tr|B3KX11|B3KX11_HUMAN T-complex protein 1 subunit gamma OS=Homo sapiens PE=2 SV=1;>sp|P49368|TCPG_HUMAN T-complex protein 1 subunit gamma OS=Homo sapiens GN=CCT3 PE=1 SV=4;>tr|B4DUR8|B4DUR8_HUMAN T-complex protein 1 subunit gamma OS=Homo sapiens GN=CCT3
Putative uncharacterized protein (Fragment) OS		59.468	0.238274	-0.329818	0.0982848	-1.32775	0.240009	201	452880000	141230000	150390000	163550000	52413000	55371000	114110000	46851000	25957000	175220000	41964000	69061000	10	12	14	38.8	25.6	31.2	34.7	>tr|Q9BU08|Q9BU08_HUMAN Putative uncharacterized protein (Fragment) OS=Homo sapiens PE=2 SV=1;>tr|V9HW37|V9HW37_HUMAN Epididymis secretory protein Li 69 OS=Homo sapiens GN=HEL-S-69 PE=2 SV=1;>sp|P48643|TCPE_HUMAN T-complex protein 1 subunit epsilon OS=Homo
60S ribosomal protein L10a OS	RPL10A	24.831	0.238091	-0.247072	0.29537	-0.967589	-0.0689978	278	199060000	66031000	61424000	98929000	28692000	33235000	64551000	26129000	14375000	35580000	11211000	13814000	5	5	3	23.5	23.5	23.5	18.4	>sp|P62906|RL10A_HUMAN 60S ribosomal protein L10a OS=Homo sapiens GN=RPL10A PE=1 SV=2;>tr|Q1JQ76|Q1JQ76_HUMAN Ribosomal protein (Fragment) OS=Homo sapiens GN=RPL10A PE=2 SV=1
Mitochondrial NADH-ubiquinone oxidoreductase 75 kDa subunit OS	NDUFS1	79.467	0.237558	-0.0664843	-0.268869	0.0361869	0.0332292	474	534660000	180590000	187950000	277850000	108250000	85965000	99560000	30512000	38121000	157240000	41829000	63866000	17	12	14	32.5	32.5	22.3	27.4	>tr|E5KRK5|E5KRK5_HUMAN Mitochondrial NADH-ubiquinone oxidoreductase 75 kDa subunit OS=Homo sapiens GN=NDUFS1 PE=4 SV=1;>sp|P28331|NDUS1_HUMAN NADH-ubiquinone oxidoreductase 75 kDa subunit, mitochondrial OS=Homo sapiens GN=NDUFS1 PE=1 SV=3;>sp|P28331-2|NDU
Poly(A) RNA polymerase, mitochondrial OS	MTPAP	66.171	0.236912	0.212169	-0.166908	0.856309	-0.052895	774	54035000	17702000	20357000	27216000	10390000	8668500	10627000	2857400	4506100	16192000	4454200	7182200	3	2	3	9.1	9.1	5.8	9.1	>sp|Q9NVV4|PAPD1_HUMAN Poly(A) RNA polymerase, mitochondrial OS=Homo sapiens GN=MTPAP PE=1 SV=1;>sp|Q9NVV4-2|PAPD1_HUMAN Isoform 2 of Poly(A) RNA polymerase, mitochondrial OS=Homo sapiens GN=MTPAP
28S ribosomal protein S34, mitochondrial OS	MRPS34	25.65	0.236882	0.0868653	0.322274	0.0747794	-0.136458	701	109500000	44432000	34596000	37155000	12255000	14118000	38904000	21184000	9483400	33441000	10993000	10995000	2	3	3	25.7	13.3	25.7	25.7	>sp|P82930|RT34_HUMAN 28S ribosomal protein S34, mitochondrial OS=Homo sapiens GN=MRPS34 PE=1 SV=2;>tr|C9JJ19|C9JJ19_HUMAN 28S ribosomal protein S34, mitochondrial OS=Homo sapiens GN=MRPS34 PE=1 SV=2
Glucose-6-phosphate 1-dehydrogenase (Fragment) OS	G6PD	54.823	0.236863	-0.348882	0.168514	-1.41365	0.198494	191	562740000	193240000	167830000	220480000	82825000	74050000	147180000	66813000	27400000	195070000	43604000	66384000	6	6	6	48.2	48.2	45.9	39.2	>tr|Q2VF42|Q2VF42_HUMAN Glucose-6-phosphate 1-dehydrogenase (Fragment) OS=Homo sapiens GN=G6PD PE=3 SV=1;>tr|A8K8D9|A8K8D9_HUMAN Glucose-6-phosphate 1-dehydrogenase OS=Homo sapiens PE=2 SV=1;>sp|P11413|G6PD_HUMAN Glucose-6-phosphate 1-dehydrogenase OS=Homo
Delta(3,5)-Delta(2,4)-dienoyl-CoA isomerase, mitochondrial OS	ECH1	35.816	0.23682	-0.13289	-0.275612	0.267356	-0.390415	389	266520000	91767000	95641000	78761000	34506000	23799000	131060000	33193000	52517000	56703000	24068000	19324000	5	6	5	32.3	27.1	32.3	27.1	>sp|Q13011|ECH1_HUMAN Delta(3,5)-Delta(2,4)-dienoyl-CoA isomerase, mitochondrial OS=Homo sapiens GN=ECH1 PE=1 SV=2;>tr|M0R248|M0R248_HUMAN Delta(3,5)-Delta(2,4)-dienoyl-CoA isomerase, mitochondrial (Fragment) OS=Homo sapiens GN=ECH1 PE=1 SV=1
Isoform 4 of Phosphatidylinositol-binding clathrin assembly protein OS	PICALM	59.918	0.236807	-0.143909	-0.27174	-0.444027	0.28404	377	31695000	9979800	11240000	15164000	4973800	4440200	7462200	2735600	2387700	9068600	2270400	4412400	3	2	2	8	8	6	4.4	>sp|Q13492-4|PICAL_HUMAN Isoform 4 of Phosphatidylinositol-binding clathrin assembly protein OS=Homo sapiens GN=PICALM;>tr|B5BU72|B5BU72_HUMAN Phosphatidylinositol-binding clathrin assembly protein isoform 2 OS=Homo sapiens GN=PICALM PE=2 SV=1;>tr|A0A024R5
DnaJ homolog subfamily C member 10 OS	DNAJC10	91.079	0.236089	-0.0399197	0.0545011	-0.0199308	-0.154329	525	54612000	19585000	18708000	22597000	8105800	9166400	15340000	4970600	4377900	16675000	6508100	5164000	3	3	3	4.5	4.5	4.5	4.5	>sp|Q8IXB1|DJC10_HUMAN DnaJ homolog subfamily C member 10 OS=Homo sapiens GN=DNAJC10 PE=1 SV=2;>tr|B3KNK5|B3KNK5_HUMAN cDNA FLJ14795 fis, clone NT2RP4001219, highly similar to Homo sapiens DnaJ (Hsp40) homolog, subfamily C, member 10 (DNAJC10), mRNA OS=Hom
Epididymis secretory protein Li 100 OS	HEL-S-100	40.321	0.233407	0.453593	-0.888515	0.769856	1.47944	819	66652000	11343000	38000000	20543000	6485100	3075700	10285000	2166300	5764700	35824000	2692000	29159000	2	3	3	15.9	8.1	12	10.9	>tr|V9HW39|V9HW39_HUMAN Epididymis secretory protein Li 100 OS=Homo sapiens GN=HEL-S-100 PE=2 SV=1;>sp|Q9NR45|SIAS_HUMAN Sialic acid synthase OS=Homo sapiens GN=NANS PE=1 SV=2
Sec61 alpha 1 subunit (S. cerevisiae), isoform CRA	SEC61A1	52.264	0.233046	0.059041	0.095587	0.195977	-0.114441	669	253070000	75000000	94042000	105470000	32005000	38576000	63534000	16299000	23211000	84072000	26696000	32255000	4	3	3	8.8	8.8	6.5	6.5	>tr|B3KNF6|B3KNF6_HUMAN Sec61 alpha 1 subunit (S. cerevisiae), isoform CRA_c OS=Homo sapiens GN=SEC61A1 PE=2 SV=1;>sp|P61619|S61A1_HUMAN Protein transport protein Sec61 subunit alpha isoform 1 OS=Homo sapiens GN=SEC61A1 PE=1 SV=2;>tr|B4DR61|B4DR61_HUMAN Pr
40S ribosomal protein S20 OS	RPS20	13.373	0.232415	-0.299598	0.144046	-1.22972	0.186881	232	274900000	89207000	92560000	139240000	47039000	47493000	63458000	23350000	15935000	72208000	18818000	29132000	2	2	2	20.2	20.2	20.2	20.2	>sp|P60866|RS20_HUMAN 40S ribosomal protein S20 OS=Homo sapiens GN=RPS20 PE=1 SV=1;>sp|P60866-2|RS20_HUMAN Isoform 2 of 40S ribosomal protein S20 OS=Homo sapiens GN=RPS20;>tr|E5RIP1|E5RIP1_HUMAN 40S ribosomal protein S20 OS=Homo sapiens GN=RPS20 PE=1 SV=1;
Aconitate hydratase, mitochondrial OS	ACO2	85.424	0.232154	-0.0763076	-0.0369551	-0.298584	0.106616	458	1293700000	417120000	447940000	602780000	214570000	189950000	353380000	112320000	112660000	337550000	90235000	145330000	17	17	19	32.9	27.1	24.2	30	>sp|Q99798|ACON_HUMAN Aconitate hydratase, mitochondrial OS=Homo sapiens GN=ACO2 PE=1 SV=2;>tr|A2A274|A2A274_HUMAN Aconitate hydratase, mitochondrial OS=Homo sapiens GN=ACO2 PE=1 SV=1;>tr|B4DZ08|B4DZ08_HUMAN cDNA FLJ51705, highly similar to Aconitate hydra
Pyrroline-5-carboxylate reductase 2 OS	PYCR2	33.637	0.230559	-0.0265762	0.0558898	-0.0769802	-0.0586383	553	82429000	27029000	28628000	43449000	15460000	15628000	20778000	6074100	6798700	18201000	5494300	6201500	3	3	3	13.4	13.4	13.4	10.6	>sp|Q96C36|P5CR2_HUMAN Pyrroline-5-carboxylate reductase 2 OS=Homo sapiens GN=PYCR2 PE=1 SV=1;>tr|A0A087WTV6|A0A087WTV6_HUMAN Pyrroline-5-carboxylate reductase 2 OS=Homo sapiens GN=PYCR2 PE=4 SV=1;>tr|Q8NCZ0|Q8NCZ0_HUMAN Putative uncharacterized protein DK
Isoform 2 of Transmembrane 9 superfamily member 1 OS	TM9SF1	55.25	0.230495	0.136581	0.201132	0.470198	-0.261587	743	87065000	27742000	30563000	32461000	11778000	11133000	26333000	6707300	9986800	28270000	9256700	9443100	2	3	3	13.7	13.7	13.7	13.7	>sp|O15321-2|TM9S1_HUMAN Isoform 2 of Transmembrane 9 superfamily member 1 OS=Homo sapiens GN=TM9SF1;>tr|E9PMQ9|E9PMQ9_HUMAN Transmembrane 9 superfamily member 1 OS=Homo sapiens GN=TM9SF1 PE=4 SV=1;>sp|O15321|TM9S1_HUMAN Transmembrane 9 superfamily member
cDNA, FLJ94640, highly similar to Homo sapiens keratin 18 (KRT18), mRNA OS		48.029	0.229891	-0.397508	-0.219959	0.582556	-1.55512	160	3070500000	1351900000	944730000	1030400000	404390000	306270000	601970000	141790000	285730000	1438200000	805760000	352730000	14	13	13	57.9	57.9	57.9	57.9	>tr|B2RA03|B2RA03_HUMAN cDNA, FLJ94640, highly similar to Homo sapiens keratin 18 (KRT18), mRNA OS=Homo sapiens PE=2 SV=1;>tr|A0A024RAY2|A0A024RAY2_HUMAN Keratin 18, isoform CRA_a OS=Homo sapiens GN=KRT18 PE=3 SV=1;>sp|P05783|K1C18_HUMAN Keratin, type I cy
THO complex subunit 4 OS	ALYREF	26.888	0.22942	-0.138826	0.295841	-0.323678	-0.388639	384	24467000	7566400	8118800	10337000	3130100	3646300	6361800	1766200	1685700	7768800	2670100	2786800	2	2	2	10.9	10.9	10.9	10.9	>sp|Q86V81|THOC4_HUMAN THO complex subunit 4 OS=Homo sapiens GN=ALYREF PE=1 SV=3;>tr|E9PB61|E9PB61_HUMAN THO complex subunit 4 OS=Homo sapiens GN=ALYREF PE=1 SV=1
Magnesium transporter protein 1 OS	MAGT1	38.036	0.226866	0.0541326	0.0739573	0.192068	-0.103627	663	171300000	54216000	60158000	58347000	18614000	18579000	46878000	14599000	15855000	66076000	21004000	25724000	3	4	4	12.8	10.1	12.8	12.8	>sp|Q9H0U3|MAGT1_HUMAN Magnesium transporter protein 1 OS=Homo sapiens GN=MAGT1 PE=1 SV=1;>tr|B4DH58|B4DH58_HUMAN cDNA FLJ56344, highly similar to Implantation-associated protein OS=Homo sapiens PE=2 SV=1;>tr|A0A087WU53|A0A087WU53_HUMAN Magnesium transport
cDNA FLJ53363, highly similar to EH-domain-containing protein 1 OS		53.768	0.225363	-0.573985	0.514602	-2.39593	0.159371	52	75606000	29354000	22475000	14099000	4371500	5000700	35822000	18377000	5523800	25684000	6605700	11951000	3	7	4	17.9	9.1	17.9	11.8	>tr|B4DMV9|B4DMV9_HUMAN cDNA FLJ53363, highly similar to EH-domain-containing protein 1 OS=Homo sapiens PE=2 SV=1;>tr|B4DR44|B4DR44_HUMAN cDNA FLJ53643, highly similar to EH-domain-containing protein 1 OS=Homo sapiens PE=2 SV=1;>tr|B4DTR4|B4DTR4_HUMAN cDNA
SLC12A2 protein OS	SLC12A2	129.72	0.224599	0.176319	-0.343659	0.245009	0.627607	761	28890000	11039000	8737600	15956000	7618200	4028200	9585100	2587400	3479600	3348800	833290	1229800	3	3	2	5.9	5	3.4	2.6	>tr|B7ZM24|B7ZM24_HUMAN SLC12A2 protein OS=Homo sapiens GN=SLC12A2 PE=2 SV=1;>sp|P55011-3|S12A2_HUMAN Isoform 2 of Solute carrier family 12 member 2 OS=Homo sapiens GN=SLC12A2;>tr|Q53ZR1|Q53ZR1_HUMAN Bumetanide-sensitive Na-K-Cl cotransporter OS=Homo sapie
cDNA FLJ52141, highly similar to 14-3-3 protein gamma OS		23.502	0.224196	-0.357351	0.343692	-1.49395	0.0781998	182	326360000	109430000	99772000	104150000	33073000	39468000	128130000	54690000	20733000	94081000	21668000	39571000	3	3	3	36.7	36.7	36.7	36.7	>tr|B4DE78|B4DE78_HUMAN cDNA FLJ52141, highly similar to 14-3-3 protein gamma OS=Homo sapiens PE=2 SV=1;>sp|P61981|1433G_HUMAN 14-3-3 protein gamma OS=Homo sapiens GN=YWHAG PE=1 SV=2;>tr|B3KNB4|B3KNB4_HUMAN cDNA FLJ14168 fis, clone NT2RP2001440, highly sim
Adenylyl cyclase-associated protein OS		49.08	0.223878	-0.497988	0.422771	-2.09191	0.175173	94	322120000	103710000	95370000	65515000	19895000	23519000	119460000	60192000	19634000	137150000	23628000	52217000	6	8	10	37.4	22.1	29.9	35.6	>tr|B4DI38|B4DI38_HUMAN Adenylyl cyclase-associated protein OS=Homo sapiens PE=2 SV=1;>tr|D3DPU2|D3DPU2_HUMAN Adenylyl cyclase-associated protein OS=Homo sapiens GN=CAP1 PE=3 SV=1;>tr|B2RDY9|B2RDY9_HUMAN Adenylyl cyclase-associated protein OS=Homo sapiens
Methylcrotonoyl-CoA carboxylase beta chain, mitochondrial OS	MCCC2	61.332	0.223663	-0.0293143	-0.121455	-0.000562751	0.0340749	547	804360000	333010000	84345000	416790000	42483000	33781000	330320000	275360000	29037000	57257000	15173000	21527000	9	10	8	30	21.1	25.2	22	>sp|Q9HCC0|MCCB_HUMAN Methylcrotonoyl-CoA carboxylase beta chain, mitochondrial OS=Homo sapiens GN=MCCC2 PE=1 SV=1;>sp|Q9HCC0-2|MCCB_HUMAN Isoform 2 of Methylcrotonoyl-CoA carboxylase beta chain, mitochondrial OS=Homo sapiens GN=MCCC2;>tr|D6RD67|D6RD67_HUM
Procollagen-lysine,2-oxoglutarate 5-dioxygenase 2 OS	PLOD2	81.169	0.223491	-0.0870251	-0.0403486	0.128821	-0.349548	446	316440000	108610000	111910000	118630000	47455000	42875000	94777000	25515000	35518000	103030000	35637000	33513000	9	10	10	21.6	18.1	20.2	19.3	>tr|E7ETU9|E7ETU9_HUMAN Procollagen-lysine,2-oxoglutarate 5-dioxygenase 2 OS=Homo sapiens GN=PLOD2 PE=1 SV=1;>tr|B4DHG3|B4DHG3_HUMAN cDNA FLJ55329, highly similar to Procollagen-lysine,2-oxoglutarate5-dioxygenase 2 (EC 1.14.11.4) OS=Homo sapiens PE=2 SV=1;
Isoform 3 of Carnitine O-acetyltransferase OS	CRAT	61.87	0.219993	-0.0948121	-0.387676	0.138552	-0.035313	431	155700000	52065000	50530000	81471000	29387000	26452000	34615000	11607000	9697200	39613000	11072000	14381000	7	5	5	15.6	15.6	12.1	12.1	>sp|P43155-3|CACP_HUMAN Isoform 3 of Carnitine O-acetyltransferase OS=Homo sapiens GN=CRAT;>sp|P43155-2|CACP_HUMAN Isoform 2 of Carnitine O-acetyltransferase OS=Homo sapiens GN=CRAT;>sp|P43155|CACP_HUMAN Carnitine O-acetyltransferase OS=Homo sapiens GN=CRA
cDNA FLJ75059, highly similar to Homo sapiens phosphoribosylformylglycinamidine synthase (FGAR amidotransferase) (PFAS), mRNA OS		144.64	0.219946	-0.264477	-0.0318281	-1.1012	0.339594	266	85995000	26238000	32731000	23645000	8421300	7977900	36600000	10743000	14369000	25750000	7073200	10384000	2	4	3	4.8	2	4.8	3.4	>tr|A8K9T9|A8K9T9_HUMAN cDNA FLJ75059, highly similar to Homo sapiens phosphoribosylformylglycinamidine synthase (FGAR amidotransferase) (PFAS), mRNA OS=Homo sapiens PE=2 SV=1;>tr|A8K8N7|A8K8N7_HUMAN Phosphoribosylformylglycinamidine synthase (FGAR amidotr
cDNA FLJ56126, highly similar to Programmed cell death 6-interacting protein OS		71.819	0.219121	-0.267113	0.262072	-1.13559	0.0721745	265	20541000	7085800	6481600	5127300	1715200	1887900	10825000	4331700	2903100	4588900	1038900	1690600	2	3	2	5.9	4.2	5.9	4.2	>tr|B7Z5C1|B7Z5C1_HUMAN cDNA FLJ56126, highly similar to Programmed cell death 6-interacting protein OS=Homo sapiens PE=2 SV=1;>tr|Q4W4Y1|Q4W4Y1_HUMAN Dopamine receptor interacting protein 4 OS=Homo sapiens GN=DRIP4 PE=2 SV=1;>sp|Q8WUM4|PDC6I_HUMAN Program
Peptidyl-prolyl cis-trans isomerase OS	PPIF	15.35	0.218521	-0.0464577	-0.077726	0.0985544	-0.160202	513	47506000	16159000	17007000	21004000	7458900	7041800	7659800	2376600	3036400	18842000	6323000	6928800	3	2	3	34.5	34.5	20	34.5	>tr|R4GN99|R4GN99_HUMAN Peptidyl-prolyl cis-trans isomerase OS=Homo sapiens GN=PPIF PE=1 SV=1;>sp|P30405-2|PPIF_HUMAN Isoform 2 of Peptidyl-prolyl cis-trans isomerase F, mitochondrial OS=Homo sapiens GN=PPIF;>tr|B2R6X6|B2R6X6_HUMAN Peptidyl-prolyl cis-tran
Annexin OS	ANXA5	29.337	0.217331	-0.301793	-0.0385841	-1.26569	0.398898	229	12894000	4210600	4086500	3697300	1008500	1444400	5876200	2566700	1063400	3320000	635440	1578700	1	2	1	13.8	9.6	13.8	9.6	>tr|D6RBL5|D6RBL5_HUMAN Annexin OS=Homo sapiens GN=ANXA5 PE=1 SV=1;>tr|V9HWE0|V9HWE0_HUMAN Annexin OS=Homo sapiens GN=HEL-S-7 PE=2 SV=1;>sp|P08758|ANXA5_HUMAN Annexin A5 OS=Homo sapiens GN=ANXA5 PE=1 SV=2;>tr|E9PHT9|E9PHT9_HUMAN Annexin OS=Homo sapiens GN=
CSTB protein OS	CSTB	11.139	0.215457	-0.284018	-0.247012	-1.12045	0.51541	243.5	105780000	36311000	32034000	35931000	13991000	12127000	36524000	16252000	7972600	33330000	6068000	11935000	3	3	3	46.9	46.9	46.9	46.9	>tr|Q76LA1|Q76LA1_HUMAN CSTB protein OS=Homo sapiens GN=CSTB PE=2 SV=1;>sp|P04080|CYTB_HUMAN Cystatin-B OS=Homo sapiens GN=CSTB PE=1 SV=2
Isoform 2 of RuvB-like 2 OS	RUVBL2	46.306	0.215208	-0.227972	0.171335	-0.987102	0.131853	297	341620000	112470000	114790000	138820000	47910000	48544000	106390000	37905000	30210000	96410000	26650000	36037000	10	9	9	30.9	30.9	26.8	26.8	>sp|Q9Y230-2|RUVB2_HUMAN Isoform 2 of RuvB-like 2 OS=Homo sapiens GN=RUVBL2;>tr|B3KNL2|B3KNL2_HUMAN RuvB-like 2 (E. coli), isoform CRA_d OS=Homo sapiens GN=RUVBL2 PE=2 SV=1;>sp|Q9Y230|RUVB2_HUMAN RuvB-like 2 OS=Homo sapiens GN=RUVBL2 PE=1 SV=3;>tr|M0R0Y3|M
Isoform 3 of T-complex protein 1 subunit eta OS	CCT7	54.804	0.214901	-0.298112	0.160146	-1.29156	0.237074	234	328810000	103380000	103860000	168800000	55123000	52466000	73954000	29659000	15431000	86054000	18598000	35962000	10	6	8	32.3	30.3	14.8	21.2	>sp|Q99832-3|TCPH_HUMAN Isoform 3 of T-complex protein 1 subunit eta OS=Homo sapiens GN=CCT7;>tr|Q6IBT3|Q6IBT3_HUMAN CCT7 protein OS=Homo sapiens GN=CCT7 PE=2 SV=1;>tr|Q53HV2|Q53HV2_HUMAN Chaperonin containing TCP1, subunit 7 (Eta) variant (Fragment) OS=Ho
Acetyl-CoA acetyltransferase, mitochondrial OS	ACAT1	45.199	0.211547	-0.130028	-0.566784	0.134615	0.042084	392	560020000	190650000	188080000	224020000	100370000	63573000	189160000	50416000	68610000	146840000	39861000	55901000	9	10	8	38.4	28.6	33	28.1	>sp|P24752|THIL_HUMAN Acetyl-CoA acetyltransferase, mitochondrial OS=Homo sapiens GN=ACAT1 PE=1 SV=1
Profilin-1 OS	PFN1	15.054	0.21152	-0.45107	0.399991	-1.97415	0.220949	124	1506700000	519060000	471770000	579730000	184010000	223520000	483920000	230260000	77385000	443000000	104790000	170860000	9	9	8	85.7	81.4	66.4	63.6	>sp|P07737|PROF1_HUMAN Profilin-1 OS=Homo sapiens GN=PFN1 PE=1 SV=2;>tr|K7EJ44|K7EJ44_HUMAN Profilin 1, isoform CRA_b OS=Homo sapiens GN=PFN1 PE=1 SV=1
Mitochondrial ribosomal protein L14, isoform CRA	MRPL14	15.947	0.211388	-0.0658828	-0.288946	0.0422241	0.0490731	476	78749000	25098000	26740000	31048000	11460000	9120800	24153000	7510300	8982600	23548000	6127800	8636100	4	3	3	35.9	35.9	29	29	>tr|A0A024RD78|A0A024RD78_HUMAN Mitochondrial ribosomal protein L14, isoform CRA_b OS=Homo sapiens GN=MRPL14 PE=3 SV=1;>sp|Q6P1L8|RM14_HUMAN 39S ribosomal protein L14, mitochondrial OS=Homo sapiens GN=MRPL14 PE=1 SV=1
ELAV-like protein 1 OS	ELAVL1	36.091	0.210852	-0.0450803	-0.157287	0.101112	-0.0790665	516	312230000	101890000	108730000	149780000	54881000	48034000	54004000	15596000	19909000	108450000	31415000	40786000	7	4	5	24.8	24.8	11.7	17.2	>sp|Q15717|ELAV1_HUMAN ELAV-like protein 1 OS=Homo sapiens GN=ELAVL1 PE=1 SV=2;>sp|Q15717-2|ELAV1_HUMAN Isoform 2 of ELAV-like protein 1 OS=Homo sapiens GN=ELAVL1;>tr|M0QZR9|M0QZR9_HUMAN ELAV-like protein 1 OS=Homo sapiens GN=ELAVL1 PE=1 SV=1
ATP-dependent RNA helicase DDX39A OS	DDX39A	49.129	0.210705	-0.180701	-0.412251	-0.557136	0.427284	334	148600000	46106000	48017000	53325000	21076000	13865000	30856000	11636000	8650900	64422000	13394000	25502000	4	4	7	44.3	32.3	32.3	42.6	>sp|O00148|DX39A_HUMAN ATP-dependent RNA helicase DDX39A OS=Homo sapiens GN=DDX39A PE=1 SV=2;>tr|B4DX78|B4DX78_HUMAN cDNA FLJ55484, highly similar to ATP-dependent RNA helicase DDX39 (EC 3.6.1.-) OS=Homo sapiens PE=2 SV=1;>sp|O00148-2|DX39A_HUMAN Isoform 2
Isoform 2 of Ubiquinone biosynthesis monooxygenase COQ6 OS	COQ6	42.873	0.210377	0.088157	-0.188677	0.326307	0.126841	704	37433000	12420000	13305000	16422000	5929200	5318700	5198200	1728600	2093000	15814000	4762600	5893300	2	2	3	9.5	6.9	6.1	9.5	>sp|Q9Y2Z9-2|COQ6_HUMAN Isoform 2 of Ubiquinone biosynthesis monooxygenase COQ6 OS=Homo sapiens GN=COQ6;>sp|Q9Y2Z9-3|COQ6_HUMAN Isoform 3 of Ubiquinone biosynthesis monooxygenase COQ6 OS=Homo sapiens GN=COQ6;>tr|G3XA86|G3XA86_HUMAN Ubiquinone biosynthesis
Insulin-degrading enzyme OS	IDE	117.97	0.210215	-0.115594	-0.149633	-0.438014	0.240864	406	107790000	36872000	34403000	37427000	15092000	11976000	17863000	6579400	5589400	52505000	15201000	16838000	4	4	5	5.8	4.3	4.3	5.8	>sp|P14735|IDE_HUMAN Insulin-degrading enzyme OS=Homo sapiens GN=IDE PE=1 SV=4;>tr|Q59GA5|Q59GA5_HUMAN Insulysin variant (Fragment) OS=Homo sapiens PE=2 SV=1
cDNA FLJ75881, highly similar to Homo sapiens transferrin receptor (p90, CD71) (TFRC), mRNA OS		84.872	0.210063	-0.025001	-0.0546021	0.0589399	-0.0793408	556	3384500000	1090500000	1186600000	1421200000	545480000	458230000	1000700000	278760000	376860000	962600000	266250000	351560000	23	22	23	38	36.7	33.7	36.3	>tr|A8K6Q8|A8K6Q8_HUMAN cDNA FLJ75881, highly similar to Homo sapiens transferrin receptor (p90, CD71) (TFRC), mRNA OS=Homo sapiens PE=2 SV=1;>sp|P02786|TFR1_HUMAN Transferrin receptor protein 1 OS=Homo sapiens GN=TFRC PE=1 SV=2;>tr|G3V0E5|G3V0E5_HUMAN Tra
40S ribosomal protein S15a OS	RPS15A	11.477	0.209701	-0.197687	0.307895	-0.836913	-0.0640425	317	522810000	164270000	179510000	244350000	74363000	92280000	121380000	45739000	30077000	157080000	44167000	57153000	3	3	3	26	26	26	26	>tr|I3L3P7|I3L3P7_HUMAN 40S ribosomal protein S15a OS=Homo sapiens GN=RPS15A PE=1 SV=1;>tr|B2R4W8|B2R4W8_HUMAN HCG1994130, isoform CRA_a OS=Homo sapiens GN=hCG_1994130 PE=2 SV=1;>sp|P62244|RS15A_HUMAN 40S ribosomal protein S15a OS=Homo sapiens GN=RPS15A PE
60S ribosomal protein L23a OS	RPL23A	17.695	0.208992	-0.355227	0.360083	-1.56392	0.138159	183	157350000	51507000	51752000	61857000	18086000	23607000	49071000	20520000	10783000	46427000	12901000	17363000	3	3	3	21.8	21.8	21.8	21.8	>sp|P62750|RL23A_HUMAN 60S ribosomal protein L23a OS=Homo sapiens GN=RPL23A PE=1 SV=1;>tr|H7BY10|H7BY10_HUMAN 60S ribosomal protein L23a (Fragment) OS=Homo sapiens GN=RPL23A PE=1 SV=1;>tr|K7EJV9|K7EJV9_HUMAN 60S ribosomal protein L23a (Fragment) OS=Homo sa
DnaJ homolog subfamily B member 12 OS	DNAJB12	41.818	0.2088	-0.0579311	-0.111274	0.134221	-0.19674	491	58822000	19286000	21610000	19298000	6796800	6600800	16886000	6123800	5887200	22638000	6365200	9122000	4	4	5	17.3	14.4	14.7	17.3	>sp|Q9NXW2|DJB12_HUMAN DnaJ homolog subfamily B member 12 OS=Homo sapiens GN=DNAJB12 PE=1 SV=4;>tr|J3KPS0|J3KPS0_HUMAN DnaJ (Hsp40) homolog, subfamily B, member 12, isoform CRA_c OS=Homo sapiens GN=DNAJB12 PE=1 SV=1;>tr|V9GYN7|V9GYN7_HUMAN DnaJ homolog sub
39S ribosomal protein L45, mitochondrial OS	MRPL45	29.348	0.208037	-0.142272	-0.630997	0.111298	0.0928839	379	22990000	7200200	7288200	9254600	3249000	2672700	6219200	1903200	2317200	7516200	2048000	2298400	2	2	2	14.8	14.8	14.8	14.8	>tr|A0A087WU62|A0A087WU62_HUMAN 39S ribosomal protein L45, mitochondrial OS=Homo sapiens GN=MRPL45 PE=4 SV=1;>tr|A0A087X2D5|A0A087X2D5_HUMAN 39S ribosomal protein L45, mitochondrial OS=Homo sapiens GN=MRPL45 PE=4 SV=1;>sp|Q9BRJ2|RM45_HUMAN 39S ribosomal pr
ARHG protein (Fragment) OS	ARHG	21.308	0.207816	-0.0237527	-0.0608938	-0.0681959	0.0578315	558	50271000	15566000	18425000	18536000	5921000	7026100	10797000	3310100	4025000	20938000	6334900	7374000	3	2	3	25.7	25.7	18.8	25.7	>tr|Q6ICQ8|Q6ICQ8_HUMAN ARHG protein (Fragment) OS=Homo sapiens GN=ARHG PE=2 SV=1;>sp|P84095|RHOG_HUMAN Rho-related GTP-binding protein RhoG OS=Homo sapiens GN=RHOG PE=1 SV=1
Aldehyde dehydrogenase, dimeric NADP-preferring OS	ALDH3A1	50.394	0.20754	-0.279303	0.292193	-1.23497	0.104873	252	1893500000	623400000	565240000	619120000	215100000	223280000	698250000	263580000	128110000	576110000	144720000	213850000	9	9	9	27.2	27.2	27.2	27.2	>sp|P30838|AL3A1_HUMAN Aldehyde dehydrogenase, dimeric NADP-preferring OS=Homo sapiens GN=ALDH3A1 PE=1 SV=3;>tr|Q6PKA6|Q6PKA6_HUMAN ALDH3A1 protein (Fragment) OS=Homo sapiens GN=ALDH3A1 PE=2 SV=1;>tr|C9JMC5|C9JMC5_HUMAN Aldehyde dehydrogenase, dimeric NADP
cDNA, FLJ93097, highly similar to Homo sapiens low density lipoprotein receptor-related protein associated protein 1 (LRPAP1), mRNA OS		41.48	0.205864	-0.0547181	0.113967	-0.214441	-0.0636805	498	64426000	19289000	23721000	26647000	8860600	8823000	13220000	4207000	4066300	24559000	6221300	10832000	2	2	3	12.9	8.4	8.4	12.9	>tr|B2R6S9|B2R6S9_HUMAN cDNA, FLJ93097, highly similar to Homo sapiens low density lipoprotein receptor-related protein associated protein 1 (LRPAP1), mRNA OS=Homo sapiens PE=2 SV=1;>sp|P30533|AMRP_HUMAN Alpha-2-macroglobulin receptor-associated protein OS
Epididymis secretory protein Li 105 OS	HEL-S-105	69.398	0.205692	-0.367981	0.211012	-1.64368	0.328722	174	53056000	18421000	16050000	16751000	5085300	6802600	19167000	9510900	3091600	17138000	3824400	6155900	3	3	2	19.3	11.1	17.7	11.4	>tr|V9HW42|V9HW42_HUMAN Epididymis secretory protein Li 105 OS=Homo sapiens GN=HEL-S-105 PE=2 SV=1;>tr|Q6NUR7|Q6NUR7_HUMAN Ezrin OS=Homo sapiens GN=EZR PE=2 SV=1;>tr|E7EQR4|E7EQR4_HUMAN Ezrin OS=Homo sapiens GN=EZR PE=1 SV=3;>tr|B2R6J2|B2R6J2_HUMAN cDNA, F
Annexin OS	ANXA1	38.714	0.205517	-0.290536	0.116897	-1.29407	0.305562	240	4081900000	1318900000	1176200000	1434000000	491860000	480220000	1618900000	593160000	294970000	1029000000	233910000	401020000	15	15	13	54.9	51.2	53.5	45.4	>tr|Q5TZZ9|Q5TZZ9_HUMAN Annexin OS=Homo sapiens GN=ANXA1 PE=2 SV=1;>sp|P04083|ANXA1_HUMAN Annexin A1 OS=Homo sapiens GN=ANXA1 PE=1 SV=2;>tr|B5BU38|B5BU38_HUMAN Annexin OS=Homo sapiens GN=ANXA1 PE=2 SV=1;>tr|Q5T3N1|Q5T3N1_HUMAN Annexin (Fragment) OS=Homo sa
Acylglycerol kinase, mitochondrial OS	AGK	26.925	0.203715	0.0865598	-0.094341	0.387693	-0.0336729	700	64988000	19306000	25248000	22128000	7056700	6850600	13411000	3544700	5246800	29449000	8704200	13151000	4	3	4	30.7	20.5	13.5	23.8	>tr|E9PG39|E9PG39_HUMAN Acylglycerol kinase, mitochondrial OS=Homo sapiens GN=AGK PE=1 SV=1;>tr|E9PC15|E9PC15_HUMAN Acylglycerol kinase, mitochondrial OS=Homo sapiens GN=AGK PE=1 SV=1;>tr|B4E2Z8|B4E2Z8_HUMAN cDNA FLJ61206, highly similar to Homo sapiens mu
Isoform 2 of Proteasome subunit alpha type-7 OS	PSMA7	20.193	0.203364	-0.16861	-0.00813082	-0.741855	0.244156	352	245360000	76477000	80906000	79492000	26259000	26328000	88536000	31800000	22353000	77332000	18417000	32224000	5	5	4	35.4	35.4	35.4	30.3	>sp|O14818-2|PSA7_HUMAN Isoform 2 of Proteasome subunit alpha type-7 OS=Homo sapiens GN=PSMA7;>tr|Q05DH1|Q05DH1_HUMAN Proteasome subunit alpha type (Fragment) OS=Homo sapiens GN=PSMA7 PE=2 SV=1;>sp|O14818|PSA7_HUMAN Proteasome subunit alpha type-7 OS=Homo
Isoform 4 of Melanoma inhibitory activity protein 3 OS	MIA3	87.437	0.203168	-0.104505	-0.104759	0.213378	-0.422134	419	21906000	7560400	7301400	7562500	2622800	2161400	7001500	2163900	2648500	7341500	2773700	2491500	3	3	3	5.7	5.7	5.7	5.7	>sp|Q5JRA6-4|MIA3_HUMAN Isoform 4 of Melanoma inhibitory activity protein 3 OS=Homo sapiens GN=MIA3;>sp|Q5JRA6-2|MIA3_HUMAN Isoform 2 of Melanoma inhibitory activity protein 3 OS=Homo sapiens GN=MIA3;>sp|Q5JRA6|MIA3_HUMAN Melanoma inhibitory activity prote
Inosine-5-monophosphate dehydrogenase 2 (Fragment) OS	IMPDH2	50.957	0.202761	-0.246633	-0.0412835	-1.07923	0.380619	279	63521000	19778000	19875000	26527000	8189300	8002200	14444000	6358400	2847200	22549000	5230600	9025800	3	3	4	16	10	10	11.7	>tr|H0Y4R1|H0Y4R1_HUMAN Inosine-5-monophosphate dehydrogenase 2 (Fragment) OS=Homo sapiens GN=IMPDH2 PE=1 SV=1;>sp|P12268|IMDH2_HUMAN Inosine-5-monophosphate dehydrogenase 2 OS=Homo sapiens GN=IMPDH2 PE=1 SV=2;>tr|B7Z1G4|B7Z1G4_HUMAN cDNA FLJ61601, highl
cDNA FLJ57836, highly similar to Myb-binding protein 1A OS		67.558	0.202313	-0.176604	-0.253085	0.396598	-0.673325	341	47318000	16252000	16887000	20271000	6966900	6702900	10199000	2848800	4623700	16849000	6436800	5560500	5	3	5	13.1	10.1	5.6	10.4	>tr|B4DZZ1|B4DZZ1_HUMAN cDNA FLJ57836, highly similar to Myb-binding protein 1A OS=Homo sapiens PE=2 SV=1;>tr|I3L1L3|I3L1L3_HUMAN Myb-binding protein 1A (Fragment) OS=Homo sapiens GN=MYBBP1A PE=1 SV=1;>sp|Q9BQG0|MBB1A_HUMAN Myb-binding protein 1A OS=Homo s
Endoplasmic reticulum resident protein 29 OS	HEL-S-107	28.993	0.20217	-0.106308	0.218099	-0.431287	-0.105737	416	959360000	311160000	337640000	328150000	131400000	102410000	433750000	123160000	158300000	197470000	56601000	76932000	8	8	8	42.9	39.1	40.2	39.1	>tr|V9HW71|V9HW71_HUMAN Endoplasmic reticulum resident protein 29 OS=Homo sapiens GN=HEL-S-107 PE=2 SV=1;>sp|P30040|ERP29_HUMAN Endoplasmic reticulum resident protein 29 OS=Homo sapiens GN=ERP29 PE=1 SV=4;>tr|F8VY02|F8VY02_HUMAN Endoplasmic reticulum resid
Signal recognition particle 54 kDa protein OS	SRP54	55.704	0.2019	-0.335966	0.299948	-1.52122	0.213378	196	57312000	19555000	17445000	14565000	4711400	4775200	20984000	8925400	4073200	21763000	5918400	8596400	3	5	5	14.5	6.9	14.5	14.5	>sp|P61011|SRP54_HUMAN Signal recognition particle 54 kDa protein OS=Homo sapiens GN=SRP54 PE=1 SV=1;>tr|G3V4F7|G3V4F7_HUMAN Signal recognition particle 54 kDa protein OS=Homo sapiens GN=SRP54 PE=1 SV=1;>sp|P61011-2|SRP54_HUMAN Isoform 2 of Signal recognit
Epididymis luminal protein 70 OS	HEL70	67.819	0.20135	-0.44855	0.202762	-2.02826	0.479851	128	184790000	69235000	51504000	51371000	16931000	18727000	90614000	43101000	15933000	42802000	9203800	16845000	5	8	5	31	19.1	31	22	>tr|V9HWC0|V9HWC0_HUMAN Epididymis luminal protein 70 OS=Homo sapiens GN=HEL70 PE=2 SV=1;>sp|P26038|MOES_HUMAN Moesin OS=Homo sapiens GN=MSN PE=1 SV=3;>tr|B7Z4C7|B7Z4C7_HUMAN cDNA FLJ57321, moderately similar to Moesin OS=Homo sapiens PE=2 SV=1;>tr|Q6PJT4|
40S ribosomal protein S16 OS	RPS16	14.419	0.199793	-0.253998	0.317999	-1.14791	0.067914	274	228730000	82007000	74530000	88382000	30410000	32544000	74533000	33653000	15898000	65819000	17945000	26087000	4	5	5	38	31.8	38	38	>tr|M0R210|M0R210_HUMAN 40S ribosomal protein S16 OS=Homo sapiens GN=RPS16 PE=1 SV=1;>sp|P62249|RS16_HUMAN 40S ribosomal protein S16 OS=Homo sapiens GN=RPS16 PE=1 SV=2;>tr|M0R3H0|M0R3H0_HUMAN 40S ribosomal protein S16 OS=Homo sapiens GN=RPS16 PE=1 SV=1;>tr
Isoform 2 of Glyceraldehyde-3-phosphate dehydrogenase OS	GAPDH	31.548	0.19945	-0.292886	0.256165	-1.33821	0.203389	237	6735000000	2201700000	2201200000	2831700000	898950000	1013100000	1754400000	727690000	327240000	2149000000	575080000	860830000	15	14	14	70	57	70	57	>sp|P04406-2|G3P_HUMAN Isoform 2 of Glyceraldehyde-3-phosphate dehydrogenase OS=Homo sapiens GN=GAPDH;>tr|V9HVZ4|V9HVZ4_HUMAN Glyceraldehyde-3-phosphate dehydrogenase OS=Homo sapiens GN=HEL-S-162eP PE=2 SV=1;>sp|P04406|G3P_HUMAN Glyceraldehyde-3-phosphate
Eukaryotic peptide chain release factor subunit 1 OS	ETF1	49.03	0.199086	-0.456427	0.390007	-2.08847	0.329181	121	76021000	27196000	22571000	22439000	7038400	8861800	34572000	14417000	6975700	19010000	5741100	6733100	4	5	3	16.9	10.8	13.7	9.2	>sp|P62495|ERF1_HUMAN Eukaryotic peptide chain release factor subunit 1 OS=Homo sapiens GN=ETF1 PE=1 SV=3;>sp|P62495-2|ERF1_HUMAN Isoform 2 of Eukaryotic peptide chain release factor subunit 1 OS=Homo sapiens GN=ETF1;>tr|B7Z7P8|B7Z7P8_HUMAN Eukaryotic pept
cDNA PSEC0119 fis, clone PLACE1002376, highly similar to GPI transamidase component PIG-S OS		61.643	0.199049	-0.0744301	-0.207011	-0.208094	0.191815	461	38242000	13538000	10904000	19212000	7741500	4560700	6992900	2594700	2001300	12036000	3201600	4342200	3	2	2	6.7	6.7	4.1	4.1	>tr|Q8NBL9|Q8NBL9_HUMAN cDNA PSEC0119 fis, clone PLACE1002376, highly similar to GPI transamidase component PIG-S OS=Homo sapiens PE=2 SV=1;>tr|B2RBB2|B2RBB2_HUMAN cDNA, FLJ95416, highly similar to Homo sapiens phosphatidylinositol glycan, class S (PIGS),
Very-long-chain (3R)-3-hydroxyacyl-CoA dehydratase 3 OS	PTPLAD1	43.159	0.196946	0.0815489	0.0813396	0.33674	-0.173433	694	559210000	175490000	200960000	262080000	90161000	88790000	134500000	36266000	51222000	162620000	49066000	60945000	4	6	4	19.3	16.6	19.3	16.3	>sp|Q9P035|HACD3_HUMAN Very-long-chain (3R)-3-hydroxyacyl-CoA dehydratase 3 OS=Homo sapiens GN=PTPLAD1 PE=1 SV=2;>sp|Q9P035-2|HACD3_HUMAN Isoform 2 of Very-long-chain (3R)-3-hydroxyacyl-CoA dehydratase 3 OS=Homo sapiens GN=PTPLAD1;>tr|H3BS72|H3BS72_HUMAN V
UDP-N-acetyl-alpha-D-galactosamine:polypeptide N-acetylgalactosaminyltransferase 2 (GalNAc-T2), isoform CRA	GALNT2	60.793	0.19678	0.0598565	0.188781	0.145873	-0.155084	672	321070000	69396000	129520000	138010000	27703000	33021000	50844000	13251000	19649000	132220000	28442000	76853000	7	9	10	26.6	15.2	22.9	23.6	>tr|G3V1S6|G3V1S6_HUMAN UDP-N-acetyl-alpha-D-galactosamine:polypeptide N-acetylgalactosaminyltransferase 2 (GalNAc-T2), isoform CRA_b OS=Homo sapiens GN=GALNT2 PE=4 SV=1;>sp|Q10471|GALT2_HUMAN Polypeptide N-acetylgalactosaminyltransferase 2 OS=Homo sapiens
Carnitine O-palmitoyltransferase 2, mitochondrial OS	CPT2	73.776	0.196233	-0.0575583	0.0621218	-0.265345	0.0305479	492	147530000	47612000	50911000	80158000	25852000	27326000	20510000	6822000	6211100	46861000	14939000	17374000	10	7	8	24.3	21.1	11.1	15.8	>sp|P23786|CPT2_HUMAN Carnitine O-palmitoyltransferase 2, mitochondrial OS=Homo sapiens GN=CPT2 PE=1 SV=2;>tr|Q53G79|Q53G79_HUMAN Carnitine O-palmitoyltransferase II, mitochondrial variant (Fragment) OS=Homo sapiens PE=2 SV=1
Acyl-coenzyme A oxidase OS	ACOX1	74.441	0.196165	0.159182	-0.241492	0.71914	-0.000100957	756	340120000	118450000	113650000	175280000	75206000	53102000	42617000	10500000	18760000	122220000	32743000	41787000	11	8	13	33.5	26.8	17.1	28.6	>tr|A0A024R8T3|A0A024R8T3_HUMAN Acyl-coenzyme A oxidase OS=Homo sapiens GN=ACOX1 PE=3 SV=1;>tr|A0A024R8L7|A0A024R8L7_HUMAN Acyl-coenzyme A oxidase OS=Homo sapiens GN=ACOX1 PE=3 SV=1;>sp|Q15067-2|ACOX1_HUMAN Isoform 2 of Peroxisomal acyl-coenzyme A oxidase
Solute carrier family 25 (Mitochondrial carrier: glutamate), member 22, isoform CRA	SLC25A22	26.654	0.195941	0.143347	0.651408	-0.0140042	-0.207361	749	87144000	26476000	31124000	39163000	12040000	12939000	17826000	4835300	5639900	30155000	9600600	12546000	3	3	5	28.5	12	10	28.5	>tr|A0A024RCA6|A0A024RCA6_HUMAN Solute carrier family 25 (Mitochondrial carrier: glutamate), member 22, isoform CRA_a OS=Homo sapiens GN=SLC25A22 PE=3 SV=1;>tr|E9PJH7|E9PJH7_HUMAN Mitochondrial glutamate carrier 1 (Fragment) OS=Homo sapiens GN=SLC25A22 PE=
Isoform 2 of Flotillin-1 OS	FLOT1	42.08	0.195766	0.0555285	0.0216219	0.244644	-0.09968	664	109720000	42290000	33032000	42873000	13035000	14353000	27635000	7338700	9327400	39212000	21917000	9351400	7	6	5	27.4	24	22.4	15.8	>sp|O75955-2|FLOT1_HUMAN Isoform 2 of Flotillin-1 OS=Homo sapiens GN=FLOT1;>tr|Q6IB58|Q6IB58_HUMAN FLOT1 protein OS=Homo sapiens GN=FLOT1 PE=2 SV=1;>tr|Q5ST80|Q5ST80_HUMAN FLOT1 protein OS=Homo sapiens GN=FLOT1 PE=2 SV=1;>tr|Q53HQ0|Q53HQ0_HUMAN Flotillin 1
Heat shock protein 90kDa alpha (Cytosolic), class B member 1, isoform CRA	HSP90AB1	83.263	0.194173	-0.28242	0.24123	-1.31574	0.227248	248	1312800000	427280000	400610000	513920000	163670000	186350000	445270000	186080000	87541000	353630000	77531000	126710000	12	12	11	39.1	37	34.9	33.4	>tr|A0A024RD80|A0A024RD80_HUMAN Heat shock protein 90kDa alpha (Cytosolic), class B member 1, isoform CRA_a OS=Homo sapiens GN=HSP90AB1 PE=4 SV=1;>sp|P08238|HS90B_HUMAN Heat shock protein HSP 90-beta OS=Homo sapiens GN=HSP90AB1 PE=1 SV=4;>tr|B4DMA2|B4DMA2_
Epididymis luminal secretory protein 52 OS	EL52	84.659	0.19402	-0.275716	0.27739	-1.28367	0.179129	256	1282500000	419200000	391210000	454830000	146830000	166500000	478680000	190440000	96316000	348990000	81933000	128390000	11	14	12	38.8	33.2	36.1	35.8	>tr|K9JA46|K9JA46_HUMAN Epididymis luminal secretory protein 52 OS=Homo sapiens GN=EL52 PE=2 SV=1;>sp|P07900|HS90A_HUMAN Heat shock protein HSP 90-alpha OS=Homo sapiens GN=HSP90AA1 PE=1 SV=5;>sp|P07900-2|HS90A_HUMAN Isoform 2 of Heat shock protein HSP 90-a
Coiled-coil-helix-coiled-coil-helix domain containing 3 OS	CHCHD3	26.152	0.192614	0.128772	0.192952	0.503959	-0.310593	734	144380000	43770000	52430000	42144000	12790000	14647000	59550000	17010000	22040000	42687000	13971000	15742000	3	3	3	16.3	16.3	16.3	16.3	>tr|A4D1N4|A4D1N4_HUMAN Coiled-coil-helix-coiled-coil-helix domain containing 3 OS=Homo sapiens GN=CHCHD3 PE=4 SV=1;>sp|Q9NX63|MIC19_HUMAN MICOS complex subunit MIC19 OS=Homo sapiens GN=CHCHD3 PE=1 SV=1;>tr|C9JRZ6|C9JRZ6_HUMAN MICOS complex subunit MIC19 O
Aldo-keto reductase family 1 member B10 OS	AKR1B10	36.019	0.192233	-0.187748	-0.451524	-0.611094	0.499374	326	1337600000	433680000	407990000	554910000	232080000	158320000	359540000	123060000	97548000	423110000	78533000	152120000	6	7	7	51.3	42.4	48.4	51.3	>sp|O60218|AK1BA_HUMAN Aldo-keto reductase family 1 member B10 OS=Homo sapiens GN=AKR1B10 PE=1 SV=2
Aspartate aminotransferase OS		41.326	0.19219	-0.061206	-0.0322854	-0.269825	0.118493	487	940260000	305280000	326690000	481720000	166620000	156120000	210140000	67276000	65985000	248400000	71379000	104590000	14	11	12	43.7	43.7	32.6	34.5	>tr|B3KUZ8|B3KUZ8_HUMAN Aspartate aminotransferase OS=Homo sapiens PE=2 SV=1;>tr|A0A024R6W0|A0A024R6W0_HUMAN Aspartate aminotransferase OS=Homo sapiens GN=GOT2 PE=3 SV=1;>sp|P00505|AATM_HUMAN Aspartate aminotransferase, mitochondrial OS=Homo sapiens GN=GOT
Isoform 2 of Transportin-1 OS	TNPO1	101.31	0.19091	-0.343329	0.411535	-1.61145	0.169925	192	186890000	64268000	59041000	77435000	25635000	26719000	50686000	23357000	9517400	58774000	15276000	22805000	6	7	8	14.8	11.5	13.7	14.8	>sp|Q92973-2|TNPO1_HUMAN Isoform 2 of Transportin-1 OS=Homo sapiens GN=TNPO1;>tr|A0A024RAM0|A0A024RAM0_HUMAN Transportin 1, isoform CRA_a OS=Homo sapiens GN=TNPO1 PE=4 SV=1;>sp|Q92973|TNPO1_HUMAN Transportin-1 OS=Homo sapiens GN=TNPO1 PE=1 SV=2;>sp|Q92973-
Myosin, heavy polypeptide 9, non-muscle, isoform CRA	MYH9	226.53	0.18928	-0.181017	0.368154	-0.111383	-0.799822	333	30539000	10187000	11071000	16304000	5498700	5605700	7492100	1859100	3001000	6742500	2829400	2463900	6	4	5	6.6	5.1	3.3	3.9	>tr|A0A024R1N1|A0A024R1N1_HUMAN Myosin, heavy polypeptide 9, non-muscle, isoform CRA_a OS=Homo sapiens GN=MYH9 PE=4 SV=1;>sp|P35579|MYH9_HUMAN Myosin-9 OS=Homo sapiens GN=MYH9 PE=1 SV=4;>sp|P35579-2|MYH9_HUMAN Isoform 2 of Myosin-9 OS=Homo sapiens GN=MYH9;
Epididymis secretory sperm binding protein Li 46e OS	GDI2	50.663	0.189083	-0.324871	0.499884	-1.51321	0.0387171	208	120230000	40873000	36321000	30011000	9391300	11559000	47740000	20688000	9093000	42478000	10794000	15670000	5	6	5	28.1	16.6	16.9	20.2	>tr|Q6IAT1|Q6IAT1_HUMAN Epididymis secretory sperm binding protein Li 46e OS=Homo sapiens GN=GDI2 PE=2 SV=1;>sp|P50395|GDIB_HUMAN Rab GDP dissociation inhibitor beta OS=Homo sapiens GN=GDI2 PE=1 SV=2;>tr|B4DLV7|B4DLV7_HUMAN cDNA FLJ60299, highly similar to
Vacuole membrane protein 1 OS	VMP1	46.237	0.188957	0.134016	-0.212768	0.622556	-0.00773913	738	100540000	27054000	37978000	12097000	4189000	3760000	34118000	8899500	12712000	54322000	13966000	21507000	2	2	3	13.8	6.4	11.3	13.8	>sp|Q96GC9|VMP1_HUMAN Vacuole membrane protein 1 OS=Homo sapiens GN=VMP1 PE=1 SV=1;>tr|D3DU01|D3DU01_HUMAN Transmembrane protein 49, isoform CRA_b OS=Homo sapiens GN=TMEM49 PE=4 SV=1;>sp|Q96GC9-2|VMP1_HUMAN Isoform 2 of Vacuole membrane protein 1 OS=Homo s
Isoform 2 of Glycogen phosphorylase, liver form OS	PYGL	93.133	0.187426	-0.249889	0.20389	-1.19393	0.240375	276	34425000	10463000	12422000	10800000	3122300	4025900	9368000	4168500	2374900	14257000	3172300	6021500	2	2	3	8.9	5.8	7.7	8.9	>sp|P06737-2|PYGL_HUMAN Isoform 2 of Glycogen phosphorylase, liver form OS=Homo sapiens GN=PYGL;>tr|B2R825|B2R825_HUMAN Alpha-1,4 glucan phosphorylase OS=Homo sapiens PE=2 SV=1;>sp|P06737|PYGL_HUMAN Glycogen phosphorylase, liver form OS=Homo sapiens GN=PYG
Isoform 2 of Pre-mRNA-processing factor 6 OS	PRPF6	102.43	0.183504	-0.208327	-0.831153	0.541416	-0.335244	310	36808000	14825000	10878000	17620000	7789300	3801000	14576000	5382700	5325100	4611600	1652600	1752300	4	2	2	5.4	5.4	2.8	2.6	>sp|O94906-2|PRP6_HUMAN Isoform 2 of Pre-mRNA-processing factor 6 OS=Homo sapiens GN=PRPF6;>sp|O94906|PRP6_HUMAN Pre-mRNA-processing factor 6 OS=Homo sapiens GN=PRPF6 PE=1 SV=1
Pyruvate kinase OS	HEL-S-30	57.936	0.182748	-0.327758	0.346758	-1.59427	0.264236	204	6262000000	2083900000	1981100000	2503500000	830430000	943410000	1803000000	820070000	328960000	1955500000	433420000	708780000	21	23	24	59.5	47.8	48.8	57.4	>tr|V9HWB8|V9HWB8_HUMAN Pyruvate kinase OS=Homo sapiens GN=HEL-S-30 PE=2 SV=1;>sp|P14618|KPYM_HUMAN Pyruvate kinase PKM OS=Homo sapiens GN=PKM PE=1 SV=4;>tr|B4DNK4|B4DNK4_HUMAN Pyruvate kinase OS=Homo sapiens PE=2 SV=1;>sp|P14618-3|KPYM_HUMAN Isoform 3 of
Probable ATP-dependent RNA helicase DDX27 OS	DDX27	86.604	0.182704	-0.278156	-0.71487	0.791689	-0.911288	253	38381000	13335000	14054000	13246000	5540500	3438500	12034000	3051200	6172400	13100000	4742800	4442700	3	4	4	5.6	4.6	5.6	5.6	>tr|B7Z6D5|B7Z6D5_HUMAN Probable ATP-dependent RNA helicase DDX27 OS=Homo sapiens GN=DDX27 PE=2 SV=1;>tr|B3GQE6|B3GQE6_HUMAN DEAD box polypeptide 27 OS=Homo sapiens GN=DDX27 PE=2 SV=1;>sp|Q96GQ7|DDX27_HUMAN Probable ATP-dependent RNA helicase DDX27 OS=Homo
Stomatin-like protein 2, mitochondrial OS	STOML2	38.534	0.182613	-0.0192424	0.054779	-0.0632283	-0.0492778	567	533240000	166590000	190140000	206970000	68248000	67821000	143500000	42231000	51544000	182760000	56114000	70771000	7	8	7	40.2	32	40.2	32	>sp|Q9UJZ1|STML2_HUMAN Stomatin-like protein 2, mitochondrial OS=Homo sapiens GN=STOML2 PE=1 SV=1;>sp|Q9UJZ1-2|STML2_HUMAN Isoform 2 of Stomatin-like protein 2, mitochondrial OS=Homo sapiens GN=STOML2;>tr|A0A087WYB4|A0A087WYB4_HUMAN Stomatin-like protein 2
Isoform 2 of ATPase family AAA domain-containing protein 3A OS	ATAD3A	66.217	0.182514	-0.0351023	0.0187766	-0.170085	0.0460021	533	263260000	71859000	80904000	106190000	38123000	34079000	82791000	13052000	17237000	74280000	20684000	29588000	8	7	8	21.5	19.8	15.7	19.8	>sp|Q9NVI7-2|ATD3A_HUMAN Isoform 2 of ATPase family AAA domain-containing protein 3A OS=Homo sapiens GN=ATAD3A;>sp|Q9NVI7|ATD3A_HUMAN ATPase family AAA domain-containing protein 3A OS=Homo sapiens GN=ATAD3A PE=1 SV=2;>tr|H0Y2W2|H0Y2W2_HUMAN ATPase family A
Vesicle amine transport protein 1 homolog (T californica), isoform CRA	VAT1	41.92	0.18163	-0.0732426	0.123799	0.00633396	-0.34986	466	104130000	35756000	35141000	44422000	16793000	15630000	27004000	7999000	9329400	32701000	10964000	10182000	5	4	6	25.4	21.6	14.8	25.4	>tr|A0A024R1Z6|A0A024R1Z6_HUMAN Vesicle amine transport protein 1 homolog (T californica), isoform CRA_a OS=Homo sapiens GN=VAT1 PE=4 SV=1;>sp|Q99536|VAT1_HUMAN Synaptic vesicle membrane protein VAT-1 homolog OS=Homo sapiens GN=VAT1 PE=1 SV=2;>sp|Q99536-3|
60S ribosomal protein L27 OS	RPL27	9.7405	0.181209	-0.159914	0.323428	-0.742217	-0.060954	363	158540000	50681000	53982000	74737000	24219000	25824000	33791000	11319000	9378900	50008000	15143000	18780000	2	2	2	25	25	25	25	>tr|K7EQQ9|K7EQQ9_HUMAN 60S ribosomal protein L27 OS=Homo sapiens GN=RPL27 PE=1 SV=1;>tr|E4W6B6|E4W6B6_HUMAN RPL27/NME2 fusion protein (Fragment) OS=Homo sapiens GN=RPL27 PE=2 SV=1;>tr|B2R4D8|B2R4D8_HUMAN 60S ribosomal protein L27 OS=Homo sapiens PE=2 SV=1
Proteasome subunit alpha type (Fragment) OS		25.84	0.180363	-0.161045	0.119688	-0.790085	0.187261	362	76805000	27392000	25292000	39787000	15227000	13784000	15151000	6227900	3922500	21867000	5936900	7585900	3	2	3	29.9	23.9	15	20.9	>tr|Q53GF5|Q53GF5_HUMAN Proteasome subunit alpha type (Fragment) OS=Homo sapiens PE=2 SV=1;>tr|A0A024RA52|A0A024RA52_HUMAN Proteasome subunit alpha type OS=Homo sapiens GN=PSMA2 PE=3 SV=1;>sp|P25787|PSA2_HUMAN Proteasome subunit alpha type-2 OS=Homo sapien
Sulfurtransferase (Fragment) OS		33.453	0.180344	-0.0332098	-0.14143	-0.0414468	0.0832474	537	143090000	47247000	47883000	57823000	22415000	17414000	45663000	13951000	13233000	39605000	10881000	17236000	3	2	2	22.6	16.2	10.4	10.1	>tr|Q53EW8|Q53EW8_HUMAN Sulfurtransferase (Fragment) OS=Homo sapiens PE=2 SV=1;>sp|Q16762|THTR_HUMAN Thiosulfate sulfurtransferase OS=Homo sapiens GN=TST PE=1 SV=4;>tr|B4DVZ4|B4DVZ4_HUMAN Sulfurtransferase OS=Homo sapiens PE=2 SV=1
Prelamin-A/C OS	LMNA	74.139	0.18002	-0.504076	-1.46857	1.47186	-1.51552	90	433110000	166530000	138770000	133820000	65371000	26296000	125250000	27522000	73981000	174040000	73637000	38495000	15	13	16	34.9	32.4	26.2	30	>sp|P02545|LMNA_HUMAN Prelamin-A/C OS=Homo sapiens GN=LMNA PE=1 SV=1;>sp|P02545-5|LMNA_HUMAN Isoform 5 of Prelamin-A/C OS=Homo sapiens GN=LMNA;>sp|P02545-2|LMNA_HUMAN Isoform C of Prelamin-A/C OS=Homo sapiens GN=LMNA;>sp|P02545-4|LMNA_HUMAN Isoform 4 of Pr
Actin related protein 2/3 complex, subunit 2, 34kDa, isoform CRA	ARPC2	34.333	0.178935	-0.149151	0.24306	-0.724588	0.0340749	373	144820000	48970000	49164000	54011000	18637000	19467000	40998000	16601000	10202000	49809000	13732000	19495000	4	5	5	16	12.3	16	16	>tr|Q53R19|Q53R19_HUMAN Actin related protein 2/3 complex, subunit 2, 34kDa, isoform CRA_a OS=Homo sapiens GN=ARPC2 PE=2 SV=1;>sp|O15144|ARPC2_HUMAN Actin-related protein 2/3 complex subunit 2 OS=Homo sapiens GN=ARPC2 PE=1 SV=1;>tr|Q9BXV5|Q9BXV5_HUMAN PNAS
Vacuolar protein sorting-associated protein 35 OS	VPS35	91.706	0.178837	-0.370832	0.470303	-1.82756	0.244765	173	125720000	41557000	42627000	54889000	18570000	20614000	23877000	12068000	3972500	46957000	10920000	18041000	6	4	6	13.8	10.6	6.5	9.9	>sp|Q96QK1|VPS35_HUMAN Vacuolar protein sorting-associated protein 35 OS=Homo sapiens GN=VPS35 PE=1 SV=2;>tr|Q53FR4|Q53FR4_HUMAN Vacuolar protein sorting 35 variant (Fragment) OS=Homo sapiens PE=2 SV=1;>tr|Q5HYM2|Q5HYM2_HUMAN Putative uncharacterized prote
Vinculin, isoform CRA	VCL	116.72	0.178509	-0.358977	0.443819	-1.7728	0.252052	180	280590000	102160000	82987000	87234000	27014000	34385000	118080000	58516000	21651000	75276000	16627000	26950000	11	17	13	25	15.4	25	17.7	>tr|A0A024QZN4|A0A024QZN4_HUMAN Vinculin, isoform CRA_c OS=Homo sapiens GN=VCL PE=4 SV=1;>sp|P18206-2|VINC_HUMAN Isoform 1 of Vinculin OS=Homo sapiens GN=VCL;>tr|V9HWK2|V9HWK2_HUMAN Epididymis luminal protein 114 OS=Homo sapiens GN=HEL114 PE=2 SV=1;>sp|P18
PMPCB protein (Fragment) OS	PMPCB	53.508	0.178242	-0.0467578	-0.231024	0.0313951	0.0593554	512	114290000	38599000	37714000	54363000	23603000	13921000	22351000	6241800	8507900	37580000	8754900	15285000	5	4	4	19.6	15.6	11.9	10	>tr|Q96CP5|Q96CP5_HUMAN PMPCB protein (Fragment) OS=Homo sapiens GN=PMPCB PE=2 SV=2;>tr|B3KM34|B3KM34_HUMAN cDNA FLJ10132 fis, clone HEMBA1003046, highly similar to Mitochondrial-processing peptidase subunit beta, mitochondrial (EC 3.4.24.64) OS=Homo sapie
Peptidyl-prolyl cis-trans isomerase OS	HEL-S-69p	18.012	0.178006	-0.41123	0.363451	-2.03937	0.442227	150	1168600000	370000000	393900000	469810000	155490000	189240000	275760000	135300000	49267000	423060000	79204000	155400000	6	6	6	53.3	53.3	53.3	53.3	>tr|V9HWF5|V9HWF5_HUMAN Peptidyl-prolyl cis-trans isomerase OS=Homo sapiens GN=HEL-S-69p PE=2 SV=1;>tr|B2RE56|B2RE56_HUMAN Peptidyl-prolyl cis-trans isomerase OS=Homo sapiens PE=2 SV=1;>tr|A8K486|A8K486_HUMAN Peptidyl-prolyl cis-trans isomerase OS=Homo sap
Adenosylhomocysteinase OS	AHCY	47.716	0.177823	-0.31915	0.387032	-1.58143	0.236952	214	629210000	204160000	208000000	252460000	73376000	97431000	186140000	81019000	32317000	190610000	49766000	78252000	10	10	9	30.6	30.6	30.6	25.7	>sp|P23526|SAHH_HUMAN Adenosylhomocysteinase OS=Homo sapiens GN=AHCY PE=1 SV=4;>sp|P23526-2|SAHH_HUMAN Isoform 2 of Adenosylhomocysteinase OS=Homo sapiens GN=AHCY;>tr|Q1RMG2|Q1RMG2_HUMAN Adenosylhomocysteinase OS=Homo sapiens GN=AHCY PE=2 SV=1
Alanine--tRNA ligase, cytoplasmic OS	AARS	106.81	0.177167	-0.488945	0.863304	-2.37572	0.0455827	97	89077000	30792000	25149000	23345000	7732600	8434300	30454000	15849000	4282500	35278000	7210600	12433000	4	6	7	12.9	5.3	8.8	10.1	>sp|P49588|SYAC_HUMAN Alanine--tRNA ligase, cytoplasmic OS=Homo sapiens GN=AARS PE=1 SV=2;>tr|B4DR45|B4DR45_HUMAN Alanine--tRNA ligase, cytoplasmic OS=Homo sapiens GN=AARS PE=2 SV=1
CCT8 protein OS	CCT8	54.106	0.176355	-0.240257	0.333424	-1.1934	0.139208	283	474140000	145530000	154560000	175110000	50874000	62705000	141520000	54333000	30099000	157510000	40321000	61754000	9	10	10	29	23.3	27	26.4	>tr|Q7Z759|Q7Z759_HUMAN CCT8 protein OS=Homo sapiens GN=CCT8 PE=2 SV=1;>sp|P50990-2|TCPQ_HUMAN Isoform 2 of T-complex protein 1 subunit theta OS=Homo sapiens GN=CCT8;>tr|Q53HU0|Q53HU0_HUMAN Chaperonin containing TCP1, subunit 8 (Theta) variant (Fragment) O
Importin-7 OS	IPO7	119.52	0.176039	-0.364808	0.583423	-1.79992	0.122076	176	178540000	53640000	52235000	99209000	20810000	30447000	54017000	25454000	12330000	25315000	7374900	9457900	6	4	2	7.9	7	4.5	2.4	>sp|O95373|IPO7_HUMAN Importin-7 OS=Homo sapiens GN=IPO7 PE=1 SV=1;>tr|B3KQG6|B3KQG6_HUMAN cDNA FLJ90427 fis, clone NT2RP3000481, highly similar to Importin-7 OS=Homo sapiens PE=2 SV=1
Isoform 2 of Reticulon-4 OS	RTN4	40.317	0.175271	0.283192	-0.459021	1.40092	-0.0923248	794	97786000	31624000	42424000	39130000	15976000	12290000	29442000	6425000	17140000	29214000	9222200	12993000	3	5	4	46.1	19.3	42.4	23.1	>sp|Q9NQC3-2|RTN4_HUMAN Isoform 2 of Reticulon-4 OS=Homo sapiens GN=RTN4;>sp|Q9NQC3-5|RTN4_HUMAN Isoform 5 of Reticulon-4 OS=Homo sapiens GN=RTN4;>sp|Q9NQC3|RTN4_HUMAN Reticulon-4 OS=Homo sapiens GN=RTN4 PE=1 SV=2;>tr|Q6IPN0|Q6IPN0_HUMAN Reticulon OS=Homo
Elongation factor G, mitochondrial OS	GFM1	83.485	0.17527	-0.0877782	-0.394126	0.21661	-0.0858182	443	325610000	112510000	108800000	154850000	64133000	46283000	75695000	22779000	27905000	95067000	25598000	34614000	13	11	11	23.7	22	18.4	18.1	>tr|E5KND7|E5KND7_HUMAN Elongation factor G, mitochondrial OS=Homo sapiens GN=GFM1 PE=3 SV=1;>tr|E5KND5|E5KND5_HUMAN Elongation factor G, mitochondrial OS=Homo sapiens GN=GFM1 PE=3 SV=1;>sp|Q96RP9|EFGM_HUMAN Elongation factor G, mitochondrial OS=Homo sapie
Isoform 3 of Exportin-2 OS	CSE1L	107.78	0.175245	-0.415743	0.370276	-2.0851	0.467592	147	200670000	71103000	64416000	86391000	30690000	31101000	55823000	27920000	10174000	58453000	12493000	23141000	9	7	9	14.7	11.6	8.8	12.3	>sp|P55060-3|XPO2_HUMAN Isoform 3 of Exportin-2 OS=Homo sapiens GN=CSE1L;>sp|P55060|XPO2_HUMAN Exportin-2 OS=Homo sapiens GN=CSE1L PE=1 SV=3;>sp|P55060-4|XPO2_HUMAN Isoform 4 of Exportin-2 OS=Homo sapiens GN=CSE1L;>tr|B4DUC5|B4DUC5_HUMAN cDNA FLJ53202, hig
Methylcrotonoyl-CoA carboxylase subunit alpha, mitochondrial OS	MCCC1	68.331	0.175203	-0.550693	-2.27991	1.50985	-0.882012	65	150150000	93610000	23404000	112530000	86543000	14834000	9361300	2007300	5981300	28265000	5059100	2589000	10	4	4	28.9	28.9	11.9	11.5	>tr|E9PHF7|E9PHF7_HUMAN Methylcrotonoyl-CoA carboxylase subunit alpha, mitochondrial OS=Homo sapiens GN=MCCC1 PE=1 SV=1;>sp|Q96RQ3|MCCA_HUMAN Methylcrotonoyl-CoA carboxylase subunit alpha, mitochondrial OS=Homo sapiens GN=MCCC1 PE=1 SV=3;>tr|Q68D27|Q68D27_
cDNA, FLJ92803, highly similar to Homo sapiens hydroxysteroid (17-beta) dehydrogenase 4 (HSD17B4), mRNA OS		79.611	0.174594	-0.0223373	-0.0493972	0.0655723	-0.083187	562	965520000	315180000	336390000	394490000	141790000	131540000	265410000	78168000	91145000	305630000	95223000	113700000	16	15	17	33.2	28.1	27.6	31.9	>tr|B2R659|B2R659_HUMAN cDNA, FLJ92803, highly similar to Homo sapiens hydroxysteroid (17-beta) dehydrogenase 4 (HSD17B4), mRNA OS=Homo sapiens PE=2 SV=1;>sp|P51659|DHB4_HUMAN Peroxisomal multifunctional enzyme type 2 OS=Homo sapiens GN=HSD17B4 PE=1 SV=3;>
cDNA FLJ56173, highly similar to U4/U6.U5 tri-snRNP-associated protein 2 OS		56.383	0.17251	-0.0399452	-0.202572	0.0479571	0.0347792	524	125490000	45736000	41934000	55939000	24843000	15922000	33360000	10131000	12812000	36193000	10762000	13199000	5	5	5	17.2	13.3	14	15.2	>tr|B7Z7L9|B7Z7L9_HUMAN cDNA FLJ56173, highly similar to U4/U6.U5 tri-snRNP-associated protein 2 OS=Homo sapiens PE=2 SV=1;>tr|A0A087X1B2|A0A087X1B2_HUMAN U4/U6.U5 tri-snRNP-associated protein 2 OS=Homo sapiens GN=USP39 PE=4 SV=1;>sp|Q53GS9-3|SNUT2_HUMAN I
Isoform 2 of Mannosyl-oligosaccharide glucosidase OS	MOGS	80.702	0.172294	0.0770849	0.390558	-0.0572866	-0.102016	689	169850000	55394000	61332000	47003000	15055000	16404000	48349000	13693000	17688000	74497000	26645000	27240000	4	4	6	14.4	6.4	6.7	11.4	>sp|Q13724-2|MOGS_HUMAN Isoform 2 of Mannosyl-oligosaccharide glucosidase OS=Homo sapiens GN=MOGS;>tr|Q58F09|Q58F09_HUMAN Glucosidase I OS=Homo sapiens GN=GCS1 PE=2 SV=1;>sp|Q13724|MOGS_HUMAN Mannosyl-oligosaccharide glucosidase OS=Homo sapiens GN=MOGS PE=
Isocitrate dehydrogenase [NAD] subunit beta, mitochondrial OS	IDH3B	42.183	0.171963	-0.0549414	0.0650208	-0.279336	0.0494913	496	1336600000	405060000	511470000	609090000	192890000	230080000	285330000	84537000	90714000	442180000	127630000	190680000	12	10	12	45.5	42.9	35.8	40.5	>sp|O43837|IDH3B_HUMAN Isocitrate dehydrogenase [NAD] subunit beta, mitochondrial OS=Homo sapiens GN=IDH3B PE=1 SV=2;>tr|A0A087WZN1|A0A087WZN1_HUMAN Isocitrate dehydrogenase 3 (NAD+) beta, isoform CRA_d OS=Homo sapiens GN=IDH3B PE=4 SV=1;>tr|A0A087X2E5|A0A
Elongation factor 1-delta (Fragment) OS	EEF1D	28.821	0.171212	-0.259636	0.517931	-1.27932	-0.0175193	269	85485000	39372000	22330000	52389000	27697000	11865000	14804000	6174100	3690000	18292000	5500200	6774600	4	2	2	22.2	22.2	13.8	13.8	>tr|E9PK01|E9PK01_HUMAN Elongation factor 1-delta (Fragment) OS=Homo sapiens GN=EEF1D PE=1 SV=1;>sp|P29692|EF1D_HUMAN Elongation factor 1-delta OS=Homo sapiens GN=EEF1D PE=1 SV=5;>tr|E9PMW7|E9PMW7_HUMAN Elongation factor 1-delta OS=Homo sapiens GN=EEF1D PE
cDNA FLJ54243, highly similar to Secretory carrier-associated membrane protein1 OS		35.012	0.170548	0.12133	0.55719	0.115033	-0.308234	729	38131000	12744000	13366000	12706000	3052100	5801700	9169800	2341300	2886000	16256000	7350700	4678300	2	2	3	15.1	11.5	11.5	15.1	>tr|B4E2V7|B4E2V7_HUMAN cDNA FLJ54243, highly similar to Secretory carrier-associated membrane protein1 OS=Homo sapiens PE=2 SV=1;>tr|A0A087WXB0|A0A087WXB0_HUMAN Secretory carrier-associated membrane protein 1 OS=Homo sapiens GN=SCAMP1 PE=4 SV=1;>tr|A8K2G0
Mitochondrial Rho GTPase 2 OS	RHOT2	68.117	0.170019	-0.0566688	-0.211531	0.172744	-0.131218	493	54906000	16907000	21128000	16619000	5943600	5156100	23067000	6127500	10553000	15220000	4835600	5419000	2	4	2	11.5	4.7	11.5	4.7	>sp|Q8IXI1|MIRO2_HUMAN Mitochondrial Rho GTPase 2 OS=Homo sapiens GN=RHOT2 PE=1 SV=2;>tr|H3BST5|H3BST5_HUMAN Mitochondrial Rho GTPase 2 (Fragment) OS=Homo sapiens GN=RHOT2 PE=1 SV=2;>tr|I3L2C6|I3L2C6_HUMAN Mitochondrial Rho GTPase 2 (Fragment) OS=Homo sapi
ER membrane protein complex subunit 2 (Fragment) OS	EMC2	15.931	0.16849	-0.0473769	0.0258793	0.0746424	-0.242652	510	37504000	12876000	12857000	14679000	5209300	4307300	9923600	3167300	3805400	12901000	4499000	4744400	2	2	2	9.6	9.6	9.6	9.6	>tr|H0YAS9|H0YAS9_HUMAN ER membrane protein complex subunit 2 (Fragment) OS=Homo sapiens GN=EMC2 PE=1 SV=1;>tr|Q53HG5|Q53HG5_HUMAN KIAA0103 variant (Fragment) OS=Homo sapiens PE=2 SV=1;>tr|A8K4K9|A8K4K9_HUMAN cDNA FLJ76169 OS=Homo sapiens PE=2 SV=1;>sp|Q15
Heterochromatin protein 1-binding protein 3 (Fragment) OS	HP1BP3	28.515	0.16702	-0.351057	-1.15846	1.12029	-1.015	187	17717000	7360200	5394800	7379700	3902300	1526500	4366600	1222400	2356000	5970900	2235500	1512300	2	2	2	10.3	10.3	10.3	10.3	>tr|B0QZK4|B0QZK4_HUMAN Heterochromatin protein 1-binding protein 3 (Fragment) OS=Homo sapiens GN=HP1BP3 PE=1 SV=1;>tr|Q5SWC8|Q5SWC8_HUMAN Heterochromatin protein 1-binding protein 3 (Fragment) OS=Homo sapiens GN=HP1BP3 PE=1 SV=1;>tr|X6RGJ2|X6RGJ2_HUMAN He
2-oxoglutarate dehydrogenase, mitochondrial OS	OGDH	115.93	0.166497	-0.0316769	0.0618453	-0.160766	0.00388999	542	1107500000	351810000	386360000	638360000	214350000	205710000	152910000	46484000	49638000	316180000	90976000	131010000	26	15	19	36.7	33.9	20.9	26.2	>sp|Q02218|ODO1_HUMAN 2-oxoglutarate dehydrogenase, mitochondrial OS=Homo sapiens GN=OGDH PE=1 SV=3;>sp|Q02218-2|ODO1_HUMAN Isoform 2 of 2-oxoglutarate dehydrogenase, mitochondrial OS=Homo sapiens GN=OGDH;>tr|E9PDF2|E9PDF2_HUMAN 2-oxoglutarate dehydrogenas
Ras-related protein Rab-7a OS	RAB7A	23.489	0.165807	-0.0813229	-0.379245	0.215989	-0.0807133	452	343120000	113330000	119940000	145140000	60618000	44960000	123090000	31772000	49987000	74899000	20940000	24994000	7	7	6	45.9	41.1	41.1	35.7	>sp|P51149|RAB7A_HUMAN Ras-related protein Rab-7a OS=Homo sapiens GN=RAB7A PE=1 SV=1;>tr|C9J8S3|C9J8S3_HUMAN Ras-related protein Rab-7a OS=Homo sapiens GN=RAB7A PE=1 SV=1;>tr|C9J4V0|C9J4V0_HUMAN Ras-related protein Rab-7a OS=Homo sapiens GN=RAB7A PE=1 SV=1
Interleukin enhancer-binding factor 2 OS	ILF2	38.91	0.165088	-0.0874093	-0.121659	0.249506	-0.390075	445	181450000	61723000	58483000	86781000	32933000	24774000	40874000	10258000	15631000	53799000	18531000	18079000	5	5	4	30.1	25.3	22.2	17.3	>tr|B4DY09|B4DY09_HUMAN Interleukin enhancer-binding factor 2 OS=Homo sapiens GN=ILF2 PE=2 SV=1;>tr|Q53FG3|Q53FG3_HUMAN Interleukin enhancer binding factor 2 variant (Fragment) OS=Homo sapiens PE=2 SV=1;>tr|F4ZW62|F4ZW62_HUMAN NF45 OS=Homo sapiens PE=2 SV=
60S ribosomal protein L32 (Fragment) OS	RPL32	15.616	0.164535	-0.204381	0.416948	-1.04216	0.012068	314	112440000	39915000	34018000	55668000	16702000	14883000	26968000	13964000	7000000	29807000	9249500	12134000	4	2	3	28.6	28.6	11.3	28.6	>tr|D3YTB1|D3YTB1_HUMAN 60S ribosomal protein L32 (Fragment) OS=Homo sapiens GN=RPL32 PE=1 SV=1;>tr|A0A024R2G7|A0A024R2G7_HUMAN Ribosomal protein L32, isoform CRA_a OS=Homo sapiens GN=RPL32 PE=4 SV=1;>sp|P62910|RL32_HUMAN 60S ribosomal protein L32 OS=Homo
Glutamate dehydrogenase OS		56.603	0.164365	-0.0638552	0.095722	-0.334407	0.0471196	482	1859700000	585420000	678830000	983940000	321070000	348060000	334000000	106200000	99132000	541740000	158140000	231630000	18	15	15	44.6	44.6	39.3	36.9	>tr|B4DMF5|B4DMF5_HUMAN Glutamate dehydrogenase OS=Homo sapiens PE=2 SV=1;>tr|E9KL48|E9KL48_HUMAN Epididymis tissue sperm binding protein Li 18mP OS=Homo sapiens GN=GLUD1 PE=2 SV=1;>sp|P00367|DHE3_HUMAN Glutamate dehydrogenase 1, mitochondrial OS=Homo sapi
Proteasome subunit beta type-5 OS	PSMB5	28.48	0.1634	-0.182566	0.16221	-0.962688	0.252779	332	310630000	101920000	95859000	119100000	42382000	31265000	93418000	38951000	23126000	98105000	20583000	41468000	5	6	6	33.5	27.4	33.5	33.5	>sp|P28074|PSB5_HUMAN Proteasome subunit beta type-5 OS=Homo sapiens GN=PSMB5 PE=1 SV=3;>sp|P28074-3|PSB5_HUMAN Isoform 3 of Proteasome subunit beta type-5 OS=Homo sapiens GN=PSMB5
Isoform 2 of Transmembrane protein 214 OS	TMEM214	72.039	0.163357	0.14838	-0.177996	0.783918	-0.160782	753	38003000	11500000	13316000	17009000	6032300	4655200	10833000	2628400	4905900	10161000	2839200	3755300	3	3	3	8.5	6.8	6.8	6.1	>sp|Q6NUQ4-2|TM214_HUMAN Isoform 2 of Transmembrane protein 214 OS=Homo sapiens GN=TMEM214;>tr|B3LEU8|B3LEU8_HUMAN TMEM214 protein (Fragment) OS=Homo sapiens GN=TMEM214 PE=2 SV=1;>sp|Q6NUQ4|TM214_HUMAN Transmembrane protein 214 OS=Homo sapiens GN=TMEM214 P
cDNA FLJ10554 fis, clone NT2RP2002385, highly similar to Synaptic glycoprotein SC2 OS		36.053	0.162393	0.135243	-0.119338	0.716245	-0.191178	740	284760000	90128000	107750000	96693000	36941000	32885000	98765000	25234000	43214000	89305000	27953000	31650000	4	5	4	19.8	13.6	15.9	13.6	>tr|B3KM97|B3KM97_HUMAN cDNA FLJ10554 fis, clone NT2RP2002385, highly similar to Synaptic glycoprotein SC2 OS=Homo sapiens PE=2 SV=1;>sp|Q9NZ01|TECR_HUMAN Very-long-chain enoyl-CoA reductase OS=Homo sapiens GN=TECR PE=1 SV=1;>tr|B3KSQ1|B3KSQ1_HUMAN cDNA FL
Isoform 3 of Guanine nucleotide-binding protein G(s) subunit alpha isoforms short OS	GNAS	44.179	0.160736	0.135325	-0.331245	0.678973	0.0582473	741	84085000	27269000	29952000	36480000	14703000	11204000	24419000	6637000	9425100	23186000	5929400	9323500	2	3	2	13.2	10.6	13.2	10.6	>sp|P63092-3|GNAS2_HUMAN Isoform 3 of Guanine nucleotide-binding protein G(s) subunit alpha isoforms short OS=Homo sapiens GN=GNAS;>tr|Q5FWY2|Q5FWY2_HUMAN GNAS complex locus OS=Homo sapiens GN=GNAS PE=2 SV=2;>sp|P63092-2|GNAS2_HUMAN Isoform Gnas-2 of Guani
Brain acid soluble protein 1 OS	BASP1	22.693	0.159964	-0.0589052	0.182311	-0.102171	-0.256856	490	69179000	22263000	22316000	28772000	10626000	9315900	21404000	6685200	5734900	19003000	4951600	7264700	3	3	4	35.7	22.9	33.5	22.9	>sp|P80723|BASP1_HUMAN Brain acid soluble protein 1 OS=Homo sapiens GN=BASP1 PE=1 SV=2
LETM1 and EF-hand domain-containing protein 1, mitochondrial OS	LETM1	83.353	0.159485	0.03348	0.177727	-0.0612851	-0.0160014	639	883800000	275890000	317920000	334900000	110230000	117450000	291130000	83810000	97336000	257770000	81844000	103140000	14	13	13	29	27.9	25.3	26.1	>sp|O95202|LETM1_HUMAN LETM1 and EF-hand domain-containing protein 1, mitochondrial OS=Homo sapiens GN=LETM1 PE=1 SV=1;>tr|D3DVQ1|D3DVQ1_HUMAN Leucine zipper-EF-hand containing transmembrane protein 1, isoform CRA_a OS=Homo sapiens GN=LETM1 PE=4 SV=1
Phosphoribosylaminoimidazole carboxylase OS	PAICS	37.111	0.159178	-0.271635	0.473112	-1.44945	0.161436	262	54763000	16941000	17822000	22715000	6661900	8099500	17870000	7226400	4602700	14178000	3053200	5120300	4	5	3	20.7	18.3	20.7	14.1	>tr|D6RF62|D6RF62_HUMAN Phosphoribosylaminoimidazole carboxylase OS=Homo sapiens GN=PAICS PE=1 SV=1;>tr|A0A024RD93|A0A024RD93_HUMAN Phosphoribosylaminoimidazole carboxylase, phosphoribosylaminoimidazole succinocarboxamide synthetase, isoform CRA_c OS=Homo
ATP synthase subunit O, mitochondrial OS	ATP5O	23.277	0.158861	-0.0261524	-0.0586532	0.0855606	-0.105365	555	557800000	176660000	202040000	173450000	65983000	52700000	254990000	71351000	99980000	129360000	39330000	49355000	5	7	6	46.5	32.4	46.5	41.3	>sp|P48047|ATPO_HUMAN ATP synthase subunit O, mitochondrial OS=Homo sapiens GN=ATP5O PE=1 SV=1;>tr|Q53HH2|Q53HH2_HUMAN Mitochondrial ATP synthase, O subunit variant (Fragment) OS=Homo sapiens PE=2 SV=1
PRO1975 OS		44.146	0.158798	-0.0449588	-0.211882	0.13014	-0.0531344	517	695760000	241880000	230740000	291310000	113800000	92938000	154990000	42655000	54103000	249460000	85429000	83695000	11	9	10	48.6	39.7	33.8	39.9	>tr|Q9UHS8|Q9UHS8_HUMAN PRO1975 OS=Homo sapiens PE=2 SV=1;>tr|Q53HW7|Q53HW7_HUMAN Sulfide dehydrogenase like (Fragment) OS=Homo sapiens PE=2 SV=1;>tr|B2R7T6|B2R7T6_HUMAN cDNA, FLJ93596, highly similar to Homo sapiens sulfide quinone reductase-like (yeast)
Hypoxia up-regulated protein 1 OS	HYOU1	104.78	0.15839	-0.0888926	0.192321	-0.46562	0.00662125	439	367330000	119330000	125760000	187060000	62936000	61566000	95345000	32208000	28549000	84926000	24190000	35641000	17	12	11	27.5	25.9	17.9	17.9	>tr|A0A087X054|A0A087X054_HUMAN Hypoxia up-regulated protein 1 OS=Homo sapiens GN=HYOU1 PE=4 SV=1;>tr|B7Z2N4|B7Z2N4_HUMAN cDNA FLJ56074, highly similar to 150 kDa oxygen-regulated protein (Orp150) OS=Homo sapiens PE=2 SV=1;>tr|B3KXH0|B3KXH0_HUMAN cDNA FLJ4
40S ribosomal protein S25 OS	RPS25	13.742	0.158122	-0.204439	0.271426	-1.10619	0.221444	313	385650000	123100000	126160000	160070000	48695000	55985000	116750000	47333000	24464000	108820000	27072000	45715000	3	3	3	22.4	22.4	22.4	22.4	>sp|P62851|RS25_HUMAN 40S ribosomal protein S25 OS=Homo sapiens GN=RPS25 PE=1 SV=1
Serpin peptidase inhibitor, clade H (Heat shock protein 47), member 1, (Collagen binding protein 1), isoform CRA	SERPINH1	46.44	0.157846	-0.0646306	0.137241	-0.340623	0.00949053	480	733840000	238950000	257010000	324350000	111680000	107610000	192370000	60307000	57577000	217120000	66962000	91827000	14	13	12	45.7	45.7	45.5	42.8	>tr|A0A024R5K8|A0A024R5K8_HUMAN Serpin peptidase inhibitor, clade H (Heat shock protein 47), member 1, (Collagen binding protein 1), isoform CRA_a OS=Homo sapiens GN=SERPINH1 PE=3 SV=1;>sp|P50454|SERPH_HUMAN Serpin H1 OS=Homo sapiens GN=SERPINH1 PE=1 SV=2;
cDNA FLJ78686, highly similar to Homo sapiens nucleoporin 93kDa (NUP93), mRNA OS		93.381	0.156136	0.0845768	-0.129213	0.461005	-0.078061	697	252330000	81051000	92528000	86013000	32124000	26315000	78757000	25565000	28027000	87559000	23363000	38187000	8	11	10	16.7	10.9	15.3	14.3	>tr|A8K897|A8K897_HUMAN cDNA FLJ78686, highly similar to Homo sapiens nucleoporin 93kDa (NUP93), mRNA OS=Homo sapiens PE=2 SV=1;>sp|Q8N1F7|NUP93_HUMAN Nuclear pore complex protein Nup93 OS=Homo sapiens GN=NUP93 PE=1 SV=2;>tr|H3BVG0|H3BVG0_HUMAN Nuclear por
Elongation factor Ts, mitochondrial OS	TSFM	31.024	0.155829	-0.039371	-0.214391	0.0313951	0.0648829	526	111380000	38155000	36155000	52792000	21691000	14215000	21090000	6010900	7379700	37497000	10453000	14560000	3	2	3	20.4	20.4	17.2	20.4	>tr|B4DHY8|B4DHY8_HUMAN Elongation factor Ts, mitochondrial OS=Homo sapiens GN=TSFM PE=2 SV=1;>tr|E5KS95|E5KS95_HUMAN Elongation factor Ts, mitochondrial OS=Homo sapiens GN=TSFM PE=3 SV=1;>sp|P43897|EFTS_HUMAN Elongation factor Ts, mitochondrial OS=Homo sa
Similar to NADH dehydrogenase (Ubiquinone) 1 alpha subcomplex, 9 (39kD) (Fragment) OS		38.441	0.15476	0.107604	-0.206828	0.583808	-0.0541676	723	267510000	84104000	94559000	110220000	43363000	32655000	89703000	21294000	36624000	67586000	19447000	25280000	6	7	6	31.7	21.3	25.1	18.9	>tr|Q9BTT5|Q9BTT5_HUMAN Similar to NADH dehydrogenase (Ubiquinone) 1 alpha subcomplex, 9 (39kD) (Fragment) OS=Homo sapiens PE=2 SV=1;>sp|Q16795|NDUA9_HUMAN NADH dehydrogenase [ubiquinone] 1 alpha subcomplex subunit 9, mitochondrial OS=Homo sapiens GN=NDUFA
Rho GDP-dissociation inhibitor 1 OS	ARHGDIA	14.814	0.151042	-0.31762	0.0745054	-1.73312	0.705757	217	95350000	32961000	28919000	34122000	10645000	12361000	31642000	15521000	4891300	29587000	6795500	11666000	3	4	3	58.1	33.3	58.1	33.3	>tr|J3KRE2|J3KRE2_HUMAN Rho GDP-dissociation inhibitor 1 OS=Homo sapiens GN=ARHGDIA PE=1 SV=1;>tr|J3KTF8|J3KTF8_HUMAN Rho GDP-dissociation inhibitor 1 (Fragment) OS=Homo sapiens GN=ARHGDIA PE=1 SV=3;>tr|V9HWE8|V9HWE8_HUMAN Epididymis secretory sperm bindin
Proteasome activator complex subunit 3 OS	PSME3	26.867	0.150652	-0.107651	-0.208628	-0.478226	0.3639	414	164190000	62379000	59369000	26934000	10247000	7738100	89448000	45378000	20232000	47811000	6754300	31399000	3	5	4	24.7	16.9	24.7	20.8	>tr|K9J957|K9J957_HUMAN Proteasome activator complex subunit 3 OS=Homo sapiens GN=PSME3 PE=2 SV=1;>tr|V9HWJ8|V9HWJ8_HUMAN Epididymis secretory protein Li 283 OS=Homo sapiens GN=HEL-S-283 PE=2 SV=1;>sp|P61289|PSME3_HUMAN Proteasome activator complex subunit
Proteasome subunit alpha type (Fragment) OS	PSMA4	24.583	0.150007	-0.176653	0.163756	-0.991083	0.297367	340	124270000	40428000	40550000	46326000	14327000	16794000	49576000	18708000	12354000	28372000	7392600	11402000	3	3	3	19	19	19	19	>tr|H0YMZ1|H0YMZ1_HUMAN Proteasome subunit alpha type (Fragment) OS=Homo sapiens GN=PSMA4 PE=1 SV=3;>tr|H0YN18|H0YN18_HUMAN Proteasome subunit alpha type-4 OS=Homo sapiens GN=PSMA4 PE=1 SV=1;>tr|H0YL69|H0YL69_HUMAN Proteasome subunit alpha type (Fragment)
Epididymis secretory sperm binding protein Li 94n OS	HEL-S-94n	62.639	0.149697	-0.235405	0.359071	-1.32615	0.260869	288	605280000	196070000	192450000	146380000	45021000	53525000	302040000	117990000	78348000	156860000	33061000	60573000	10	15	11	37.8	23.6	36.1	26.3	>tr|V9HW72|V9HW72_HUMAN Epididymis secretory sperm binding protein Li 94n OS=Homo sapiens GN=HEL-S-94n PE=2 SV=1;>tr|A8K690|A8K690_HUMAN cDNA FLJ76863, highly similar to Homo sapiens stress-induced-phosphoprotein 1 (Hsp70/Hsp90-organizing protein) (STIP1),
LDLR chaperone MESD OS	MESDC2	26.076	0.148777	-0.0747584	0.202762	-0.396536	-0.0305013	459	227800000	72503000	82398000	103260000	32042000	36484000	59514000	19057000	17439000	65027000	21405000	28475000	7	6	6	35	35	32.1	30.3	>sp|Q14696|MESD_HUMAN LDLR chaperone MESD OS=Homo sapiens GN=MESDC2 PE=1 SV=2
Alanyl (Membrane) aminopeptidase (Aminopeptidase N, aminopeptidase M, microsomal aminopeptidase, CD13, p150), isoform CRA	ANPEP	109.54	0.148134	-0.162302	0.50284	-0.175892	-0.813854	360	32949000	9839700	11228000	5987200	1736100	2642700	19339000	4880200	5977300	7622700	3223400	2608100	2	4	2	4.4	1.4	4.4	3.1	>tr|A0A024RC61|A0A024RC61_HUMAN Alanyl (Membrane) aminopeptidase (Aminopeptidase N, aminopeptidase M, microsomal aminopeptidase, CD13, p150), isoform CRA_a OS=Homo sapiens GN=ANPEP PE=4 SV=1;>sp|P15144|AMPN_HUMAN Aminopeptidase N OS=Homo sapiens GN=ANPEP P
Pyrroline-5-carboxylate reductase OS		33.432	0.147837	-0.0797414	0.0866479	-0.453241	0.127369	455	133910000	44157000	46561000	61399000	19636000	21033000	29077000	12078000	8129300	43429000	12443000	17398000	5	5	6	27.9	22.6	22.6	27.9	>tr|E7D7Y0|E7D7Y0_HUMAN Pyrroline-5-carboxylate reductase OS=Homo sapiens PE=2 SV=1;>tr|E7D7X9|E7D7X9_HUMAN Pyrroline-5-carboxylate reductase OS=Homo sapiens PE=2 SV=1;>tr|A0A024R8U9|A0A024R8U9_HUMAN Pyrroline-5-carboxylate reductase OS=Homo sapiens GN=PYC
V-type proton ATPase subunit a OS		95.75	0.147315	0.0753543	0.19333	0.306146	-0.273413	687	35032000	10559000	12738000	12978000	3873400	4373500	10555000	2856500	3674100	11500000	3829000	4690100	2	3	3	3.6	2.6	3.6	3.6	>tr|Q53X12|Q53X12_HUMAN V-type proton ATPase subunit a OS=Homo sapiens PE=1 SV=1;>sp|Q93050-1|VPP1_HUMAN Isoform 2 of V-type proton ATPase 116 kDa subunit a isoform 1 OS=Homo sapiens GN=ATP6V0A1;>sp|Q93050|VPP1_HUMAN V-type proton ATPase 116 kDa subunit a
Epididymis luminal protein 215 OS	HEL-S-54e	29.82	0.146347	0.047811	-0.178665	0.16092	0.161178	656	1251900000	399150000	443480000	664260000	240540000	209740000	303170000	85202000	112090000	284490000	73405000	121650000	11	11	11	47.1	40.1	39.7	39.7	>tr|Q6PUJ7|Q6PUJ7_HUMAN Epididymis luminal protein 215 OS=Homo sapiens GN=HEL-S-54e PE=2 SV=1;>tr|Q6FHP5|Q6FHP5_HUMAN PHB protein (Fragment) OS=Homo sapiens GN=PHB PE=2 SV=1;>tr|A8K401|A8K401_HUMAN Prohibitin, isoform CRA_a OS=Homo sapiens GN=PHB PE=2 SV=1
Putative uncharacterized protein DKFZp586K0821 (Fragment) OS	DKFZp586K0821	22.218	0.146261	0.0989121	-0.313316	0.498353	0.111699	715	106460000	40550000	24973000	82530000	33853000	15865000	9861700	2798000	3815100	14064000	3898900	5293300	4	3	3	29.5	28.9	20	20.5	>tr|Q9UF24|Q9UF24_HUMAN Putative uncharacterized protein DKFZp586K0821 (Fragment) OS=Homo sapiens GN=DKFZp586K0821 PE=2 SV=1;>tr|Q53FM7|Q53FM7_HUMAN NADH dehydrogenase (Ubiquinone) Fe-S protein 3, 30kDa (NADH-coenzyme Q reductase) variant (Fragment) OS=Hom
Isoform 3 of Fatty acid desaturase 2 OS	FADS2	45.524	0.145504	-0.14519	-0.5199	0.545375	-0.461045	376	757580000	275350000	250330000	337520000	158360000	105940000	188830000	54252000	78626000	231230000	62739000	65764000	6	6	6	20.5	20.5	20.5	20.5	>sp|O95864-3|FADS2_HUMAN Isoform 3 of Fatty acid desaturase 2 OS=Homo sapiens GN=FADS2;>sp|O95864|FADS2_HUMAN Fatty acid desaturase 2 OS=Homo sapiens GN=FADS2 PE=1 SV=1
Isoform 3 of Pyruvate dehydrogenase E1 component subunit alpha, somatic form, mitochondrial OS	PDHA1	40.188	0.144993	0.0435553	-0.164286	0.138814	0.156138	650	148340000	45670000	51365000	74206000	24179000	22222000	24127000	6728500	8189900	50004000	14763000	20953000	3	2	4	18.9	16.2	15.6	17	>sp|P08559-3|ODPA_HUMAN Isoform 3 of Pyruvate dehydrogenase E1 component subunit alpha, somatic form, mitochondrial OS=Homo sapiens GN=PDHA1;>tr|A0A024RBX9|A0A024RBX9_HUMAN Pyruvate dehydrogenase E1 component subunit alpha OS=Homo sapiens GN=PDHA1 PE=4 SV=
Mitochondrial ribosomal protein L44, isoform CRA	MRPL44	37.535	0.143	0.0706138	-0.231193	0.0828389	0.360196	681	30024000	10788000	10057000	13811000	5733200	3705100	8241400	3024400	3039600	7972100	2030900	3311900	2	2	2	11.7	6	9.6	9.6	>tr|A0A024R473|A0A024R473_HUMAN Mitochondrial ribosomal protein L44, isoform CRA_a OS=Homo sapiens GN=MRPL44 PE=4 SV=1;>sp|Q9H9J2|RM44_HUMAN 39S ribosomal protein L44, mitochondrial OS=Homo sapiens GN=MRPL44 PE=1 SV=1
Full-length cDNA clone CS0DJ015YJ12 of T cells (Jurkat cell line) of Homo sapiens (human) OS	PSME2	27.401	0.142858	-0.107779	-0.0612099	-0.581281	0.319155	413	68774000	21480000	24477000	23729000	7950500	8952900	32810000	10732000	10848000	12235000	2797400	4676100	3	5	2	24.7	16.3	24.7	10.5	>tr|Q86SZ7|Q86SZ7_HUMAN Full-length cDNA clone CS0DJ015YJ12 of T cells (Jurkat cell line) of Homo sapiens (human) OS=Homo sapiens GN=PSME2 PE=2 SV=1;>tr|Q2TNB3|Q2TNB3_HUMAN Cell migration-inducing protein 22 OS=Homo sapiens PE=2 SV=1;>sp|Q9UL46|PSME2_HUMAN
Ras-related C3 botulinum toxin substrate 1 (Rho family, small GTP binding protein Rac1) OS	RAC1	16.797	0.142397	-0.0836517	0.290306	-0.408225	-0.133037	450	199080000	64762000	64382000	67386000	21983000	24854000	59940000	17767000	17449000	71752000	25012000	22080000	3	3	3	23.6	23.6	23.6	23.6	>tr|A4D2P2|A4D2P2_HUMAN Ras-related C3 botulinum toxin substrate 1 (Rho family, small GTP binding protein Rac1) OS=Homo sapiens GN=RAC1 PE=3 SV=1;>tr|A4D2P1|A4D2P1_HUMAN Ras-related C3 botulinum toxin substrate 1 (Rho family, small GTP binding protein Rac1
Monofunctional C1-tetrahydrofolate synthase, mitochondrial OS	MTHFD1L	99.31	0.142245	0.102448	-0.282421	0.568713	0.0210533	719	82950000	27704000	28601000	39584000	16137000	12022000	23491000	6031700	10033000	19875000	5534800	6545400	5	4	4	9.5	7.2	5.7	5.8	>tr|A0A087WVM4|A0A087WVM4_HUMAN Monofunctional C1-tetrahydrofolate synthase, mitochondrial OS=Homo sapiens GN=MTHFD1L PE=4 SV=1;>sp|Q6UB35|C1TM_HUMAN Monofunctional C1-tetrahydrofolate synthase, mitochondrial OS=Homo sapiens GN=MTHFD1L PE=1 SV=1;>tr|B7ZM99
Mitochondrial import inner membrane translocase subunit TIM50 OS	TIMM50	39.646	0.140296	0.045908	-0.169193	0.0932897	0.213627	655	254880000	77517000	88137000	118770000	38306000	35899000	61254000	17761000	22176000	74857000	21450000	30062000	5	3	4	19	19	12.7	15.9	>sp|Q3ZCQ8|TIM50_HUMAN Mitochondrial import inner membrane translocase subunit TIM50 OS=Homo sapiens GN=TIMM50 PE=1 SV=2;>tr|Q0VAB1|Q0VAB1_HUMAN Translocase of inner mitochondrial membrane 50 homolog (S. cerevisiae) OS=Homo sapiens GN=TIMM50 PE=2 SV=1;>tr|
Sepiapterin reductase OS	SPR	28.048	0.139741	-0.162682	0.520649	-0.871126	-0.137568	359	127170000	51618000	24315000	52901000	36194000	9177500	18446000	6802700	3917200	55825000	8621900	11221000	3	3	4	22.6	15.3	15.7	22.6	>sp|P35270|SPRE_HUMAN Sepiapterin reductase OS=Homo sapiens GN=SPR PE=1 SV=1
Enhancer of rudimentary homolog OS	ERH	8.2033	0.138732	-0.164531	-0.641964	0.649937	-0.501565	356	147110000	53368000	48969000	60119000	28971000	15379000	43048000	9647200	20217000	43944000	14750000	13373000	2	2	2	39.4	39.4	39.4	39.4	>tr|G3V279|G3V279_HUMAN Enhancer of rudimentary homolog OS=Homo sapiens GN=ERH PE=1 SV=1;>tr|A0A024R6D4|A0A024R6D4_HUMAN Enhancer of rudimentary homolog OS=Homo sapiens GN=ERH PE=3 SV=1;>sp|P84090|ERH_HUMAN Enhancer of rudimentary homolog OS=Homo sapiens G
TRAP1 protein (Fragment) OS	TRAP1	79.356	0.138577	-0.0292744	-0.0585031	-0.138346	0.109026	549	2742700000	878580000	977910000	1226100000	425230000	394290000	683430000	214400000	233080000	833120000	238950000	350540000	24	25	22	47.8	44.3	46.6	40.9	>tr|Q9BV61|Q9BV61_HUMAN TRAP1 protein (Fragment) OS=Homo sapiens GN=TRAP1 PE=2 SV=2;>sp|Q12931-2|TRAP1_HUMAN Isoform 2 of Heat shock protein 75 kDa, mitochondrial OS=Homo sapiens GN=TRAP1;>sp|Q12931|TRAP1_HUMAN Heat shock protein 75 kDa, mitochondrial OS=H
Beta-hexosaminidase OS	HEXB	63.111	0.137546	-0.0939064	-0.554528	0.220949	0.0518593	433	92008000	33257000	34095000	42586000	14625000	16220000	14925000	3964700	5873000	34497000	14667000	12002000	5	3	4	17.1	13.1	6.1	8.3	>tr|A0A024RAJ6|A0A024RAJ6_HUMAN Beta-hexosaminidase OS=Homo sapiens GN=HEXB PE=3 SV=1;>sp|P07686|HEXB_HUMAN Beta-hexosaminidase subunit beta OS=Homo sapiens GN=HEXB PE=1 SV=3;>tr|H0Y9B6|H0Y9B6_HUMAN Beta-hexosaminidase subunit beta (Fragment) OS=Homo sapie
Glycine--tRNA ligase OS	GARS	83.165	0.137167	-0.241629	0.586981	-1.42504	0.113167	282	164860000	58701000	63587000	57347000	15063000	21304000	45154000	30768000	5632100	62357000	12870000	36651000	4	4	7	14.3	7.8	8.8	11.8	>sp|P41250|SYG_HUMAN Glycine--tRNA ligase OS=Homo sapiens GN=GARS PE=1 SV=3
cDNA FLJ46571 fis, clone THYMU3041428, highly similar to Probable ATP-dependent RNA helicase DDX23 (EC 3.6.1.-) OS		93.233	0.13593	-0.196294	-0.959823	0.737946	-0.367006	319	45834000	16969000	14833000	19788000	9134800	4797200	12394000	2981200	5153700	13653000	4853400	4882200	3	3	2	7.9	6.4	6.4	4.2	>tr|B3KY11|B3KY11_HUMAN cDNA FLJ46571 fis, clone THYMU3041428, highly similar to Probable ATP-dependent RNA helicase DDX23 (EC 3.6.1.-) OS=Homo sapiens PE=2 SV=1;>tr|A8KA56|A8KA56_HUMAN cDNA FLJ77678, highly similar to Homo sapiens DEAD (Asp-Glu-Ala-Asp) b
NADH dehydrogenase [ubiquinone] 1 beta subcomplex subunit 9 OS	NDUFB9	20.383	0.13502	0.136149	-0.335044	0.813443	-0.0699516	742	196480000	64466000	70051000	87092000	35514000	26581000	50069000	12511000	21536000	59321000	16441000	21935000	4	4	4	37.5	37.5	37.5	37.5	>tr|E9PH64|E9PH64_HUMAN NADH dehydrogenase [ubiquinone] 1 beta subcomplex subunit 9 OS=Homo sapiens GN=NDUFB9 PE=1 SV=1;>sp|Q9Y6M9|NDUB9_HUMAN NADH dehydrogenase [ubiquinone] 1 beta subcomplex subunit 9 OS=Homo sapiens GN=NDUFB9 PE=1 SV=3;>tr|B7Z7N1|B7Z7N1
40S ribosomal protein SA (Fragment) OS	RPSA	29.505	0.134936	-0.311452	0.57628	-1.89701	0.38637	223	98583000	29573000	34183000	41587000	11521000	16038000	25072000	10601000	4295000	31924000	7450700	13851000	5	5	4	26.5	19.7	23.5	19.7	>tr|C9J9K3|C9J9K3_HUMAN 40S ribosomal protein SA (Fragment) OS=Homo sapiens GN=RPSA PE=1 SV=3;>tr|A0A024R2P0|A0A024R2P0_HUMAN 40S ribosomal protein SA OS=Homo sapiens GN=RPSA PE=3 SV=1;>sp|P08865|RSSA_HUMAN 40S ribosomal protein SA OS=Homo sapiens GN=RPSA
NAD-dependent malic enzyme, mitochondrial OS	ME2	65.443	0.134542	0.0351108	0.212134	-0.0799202	-0.026881	642	206170000	69495000	70725000	82211000	26737000	28393000	43784000	12576000	14482000	80174000	30182000	27851000	7	5	8	17.8	13.2	10.3	15.6	>sp|P23368|MAOM_HUMAN NAD-dependent malic enzyme, mitochondrial OS=Homo sapiens GN=ME2 PE=1 SV=1;>sp|P23368-2|MAOM_HUMAN Isoform 2 of NAD-dependent malic enzyme, mitochondrial OS=Homo sapiens GN=ME2
GTP-binding nuclear protein Ran OS	RAN	24.423	0.134403	-0.294958	0.490262	-1.80521	0.430071	235	1364400000	404260000	448480000	666540000	167480000	224880000	314990000	153350000	49685000	382900000	83428000	173920000	6	7	6	33.3	29.2	33.3	29.2	>sp|P62826|RAN_HUMAN GTP-binding nuclear protein Ran OS=Homo sapiens GN=RAN PE=1 SV=3;>tr|B5MDF5|B5MDF5_HUMAN GTP-binding nuclear protein Ran OS=Homo sapiens GN=RAN PE=1 SV=1;>tr|J3KQE5|J3KQE5_HUMAN GTP-binding nuclear protein Ran (Fragment) OS=Homo sapien
Isoform 2 of Asparagine synthetase [glutamine-hydrolyzing] OS	ASNS	62.168	0.134179	-0.288918	0.780898	-1.71198	0.0643311	241	24983000	7651300	9582100	9262200	2338500	3847300	5051900	2351300	939060	10669000	2961500	4795800	2	2	3	8.5	4.6	4.6	8.5	>sp|P08243-2|ASNS_HUMAN Isoform 2 of Asparagine synthetase [glutamine-hydrolyzing] OS=Homo sapiens GN=ASNS;>sp|P08243|ASNS_HUMAN Asparagine synthetase [glutamine-hydrolyzing] OS=Homo sapiens GN=ASNS PE=1 SV=4;>tr|F8WEJ5|F8WEJ5_HUMAN Asparagine synthetase [
Transforming growth factor beta regulator 4, isoform CRA	TBRG4	65.007	0.13379	-0.0481912	-0.118633	-0.218766	0.192825	507	536090000	168520000	202420000	203780000	76857000	63425000	154100000	44951000	65074000	178200000	46712000	73918000	9	7	9	18.5	18.5	13	18.5	>tr|D3DVL7|D3DVL7_HUMAN Transforming growth factor beta regulator 4, isoform CRA_b OS=Homo sapiens GN=TBRG4 PE=4 SV=1;>sp|Q969Z0|TBRG4_HUMAN Protein TBRG4 OS=Homo sapiens GN=TBRG4 PE=1 SV=1;>tr|B4DU42|B4DU42_HUMAN cDNA FLJ56153, highly similar to Homo sapi
cDNA FLJ12728 fis, clone NT2RP2000040, highly similar to Protein FAM62A OS		122.9	0.133512	0.0485686	-0.0251183	0.292546	-0.121722	657	239860000	80492000	82788000	113090000	39448000	35654000	51342000	16980000	18870000	75428000	24064000	28264000	11	8	10	16.6	14	10.5	12.6	>tr|B3KMV5|B3KMV5_HUMAN cDNA FLJ12728 fis, clone NT2RP2000040, highly similar to Protein FAM62A OS=Homo sapiens PE=2 SV=1;>tr|A0A024RB17|A0A024RB17_HUMAN Family with sequence similarity 62 (C2 domain containing), member A, isoform CRA_b OS=Homo sapiens GN=
Ferrochelatase OS	DKFZp686P18130	47.132	0.131763	-0.0324209	-0.199686	0.0297002	0.0727232	541	343530000	116130000	116100000	160470000	63268000	48544000	84131000	23482000	29647000	98932000	29383000	37908000	10	7	6	34.6	34.6	26.2	22.8	>tr|Q7KZA3|Q7KZA3_HUMAN Ferrochelatase OS=Homo sapiens GN=DKFZp686P18130 PE=2 SV=1;>tr|Q53FU1|Q53FU1_HUMAN Ferrochelatase (Fragment) OS=Homo sapiens PE=2 SV=1;>tr|Q5TZY0|Q5TZY0_HUMAN Ferrochelatase OS=Homo sapiens PE=2 SV=1;>sp|P22830|HEMH_HUMAN Ferrochela
Isoform E of Plasma membrane calcium-transporting ATPase 1 OS	ATP2B1	129.15	0.13132	0.0387455	-0.093956	0.237808	-0.0276161	647	354820000	116250000	126570000	146430000	51518000	50542000	93857000	28824000	32890000	114530000	35905000	43138000	10	9	10	17.1	13.1	11.6	10.8	>sp|P20020-5|AT2B1_HUMAN Isoform E of Plasma membrane calcium-transporting ATPase 1 OS=Homo sapiens GN=ATP2B1;>sp|P20020-2|AT2B1_HUMAN Isoform A of Plasma membrane calcium-transporting ATPase 1 OS=Homo sapiens GN=ATP2B1;>sp|P20020-6|AT2B1_HUMAN Isoform K o
Torsin-1A-interacting protein 1 OS	TOR1AIP1	66.248	0.130478	-0.146014	-0.717857	0.584482	-0.304665	374	116200000	39959000	39359000	41993000	17646000	10397000	38178000	10929000	17082000	36032000	11384000	11880000	6	7	7	18.4	16	18.4	18.4	>sp|Q5JTV8|TOIP1_HUMAN Torsin-1A-interacting protein 1 OS=Homo sapiens GN=TOR1AIP1 PE=1 SV=2;>sp|Q5JTV8-3|TOIP1_HUMAN Isoform 3 of Torsin-1A-interacting protein 1 OS=Homo sapiens GN=TOR1AIP1;>tr|J3KN66|J3KN66_HUMAN Torsin-1A-interacting protein 1 OS=Homo s
cDNA FLJ78677, highly similar to Homo sapiens splicing factor 3b, subunit 3, 130kDa (SF3B3), mRNA OS		135.58	0.130464	-0.199583	-0.753215	0.850399	-0.695933	316	232530000	81980000	81664000	99496000	40884000	26397000	87269000	22132000	41307000	45769000	18964000	13960000	10	12	7	15.3	12.3	13.8	8.6	>tr|A8K6V3|A8K6V3_HUMAN cDNA FLJ78677, highly similar to Homo sapiens splicing factor 3b, subunit 3, 130kDa (SF3B3), mRNA OS=Homo sapiens PE=2 SV=1;>sp|Q15393|SF3B3_HUMAN Splicing factor 3B subunit 3 OS=Homo sapiens GN=SF3B3 PE=1 SV=4;>tr|B3KQH1|B3KQH1_HUM
Isoform 2 of Acyl-coenzyme A thioesterase 13 OS	ACOT13	12.366	0.129781	-0.0294687	-0.180806	0.0784732	0.0139266	546	100690000	35803000	34885000	45971000	16754000	16310000	16236000	4810200	5029200	38479000	14240000	13546000	3	2	3	34.2	34.2	23.9	34.2	>sp|Q9NPJ3-2|ACO13_HUMAN Isoform 2 of Acyl-coenzyme A thioesterase 13 OS=Homo sapiens GN=ACOT13;>sp|Q9NPJ3|ACO13_HUMAN Acyl-coenzyme A thioesterase 13 OS=Homo sapiens GN=ACOT13 PE=1 SV=1
Isoform 2 of 2,4-dienoyl-CoA reductase, mitochondrial OS	DECR1	34.994	0.129395	-0.0733269	-0.415557	0.257735	-0.0621585	465	463170000	156960000	158380000	198330000	85192000	59203000	118960000	31384000	45948000	145890000	40381000	53228000	7	8	6	36.8	25.8	33.7	25.5	>sp|Q16698-2|DECR_HUMAN Isoform 2 of 2,4-dienoyl-CoA reductase, mitochondrial OS=Homo sapiens GN=DECR1;>tr|A0A024R9D7|A0A024R9D7_HUMAN 2,4-dienoyl CoA reductase 1, mitochondrial, isoform CRA_b OS=Homo sapiens GN=DECR1 PE=4 SV=1;>sp|Q16698|DECR_HUMAN 2,4-di
Ras-related protein Rab-18 OS	RAB18	22.977	0.128667	0.0813019	0.318114	0.277271	-0.351479	693	39176000	11821000	14265000	16410000	5635700	6085900	11355000	2881400	3878300	11411000	3304200	4300800	2	2	2	12.6	12.6	12.6	12.6	>sp|Q9NP72|RAB18_HUMAN Ras-related protein Rab-18 OS=Homo sapiens GN=RAB18 PE=1 SV=1;>tr|Q59EW3|Q59EW3_HUMAN RAB18, member RAS oncogene family variant (Fragment) OS=Homo sapiens PE=2 SV=1;>sp|Q9NP72-3|RAB18_HUMAN Isoform 3 of Ras-related protein Rab-18 OS=
HCG2044799 OS	HNRNPUL2-BSCL2	84.69	0.128459	-0.179962	-0.474071	0.759241	-0.825057	335	98073000	30111000	30271000	41006000	9505100	7320000	19089000	8682900	6315000	37978000	11923000	16636000	3	3	6	11.9	7	7.6	11.9	>tr|H3BQZ7|H3BQZ7_HUMAN HCG2044799 OS=Homo sapiens GN=HNRNPUL2-BSCL2 PE=4 SV=1;>sp|Q1KMD3|HNRL2_HUMAN Heterogeneous nuclear ribonucleoprotein U-like protein 2 OS=Homo sapiens GN=HNRNPUL2 PE=1 SV=1
TARS protein (Fragment) OS	TARS	78.605	0.127691	-0.312445	0.691534	-1.97812	0.349252	222	55180000	18399000	17817000	24909000	7065000	8468800	15767000	8234100	2900000	14504000	3100200	6448200	4	4	3	8.9	8.9	8.9	6.5	>tr|Q5M7Z9|Q5M7Z9_HUMAN TARS protein (Fragment) OS=Homo sapiens GN=TARS PE=2 SV=1;>tr|B2RDX5|B2RDX5_HUMAN cDNA, FLJ96812, highly similar to Homo sapiens threonyl-tRNA synthetase (TARS), mRNA OS=Homo sapiens PE=2 SV=1;>tr|Q53GX7|Q53GX7_HUMAN Threonyl-tRNA s
cDNA PSEC0127 fis, clone PLACE1003724, highly similar to Mitochondrial 28S ribosomal protein S22 OS		25.139	0.127584	-0.0444926	-0.0428431	0.161694	-0.252329	519	40698000	13793000	12773000	17132000	6231100	5214500	11553000	3371700	3712200	12013000	4190100	3846700	2	2	2	9.2	9.2	9.2	9.2	>tr|Q8NBL6|Q8NBL6_HUMAN cDNA PSEC0127 fis, clone PLACE1003724, highly similar to Mitochondrial 28S ribosomal protein S22 OS=Homo sapiens PE=2 SV=1;>tr|G5E9W7|G5E9W7_HUMAN 28S ribosomal protein S22, mitochondrial OS=Homo sapiens GN=MRPS22 PE=1 SV=1;>tr|G5E9
Immunoblobulin light chain (Fragment) OS		24.03	0.127111	-0.763758	-4.13566	2.96857	-1.12419	7	119990000	58902000	29851000	59902000	54459000	3437700	27322000	1234000	24450000	32763000	3208600	1962400	4	2	3	24.2	24.2	17.8	17.8	>tr|Q0KKI6|Q0KKI6_HUMAN Immunoblobulin light chain (Fragment) OS=Homo sapiens PE=1 SV=1;>tr|A0A087WZW8|A0A087WZW8_HUMAN Protein IGKV3-11 OS=Homo sapiens GN=IGKV3-11 PE=4 SV=1;>tr|A0A087WYL9|A0A087WYL9_HUMAN Ig kappa chain C region OS=Homo sapiens GN=IGKC P
Polyribonucleotide nucleotidyltransferase 1, mitochondrial OS	PNPT1	85.95	0.126983	0.0308785	0.0941009	-0.13424	0.132774	636	289090000	92525000	101010000	102720000	37880000	32172000	78797000	25424000	23833000	107580000	29221000	45007000	12	10	11	22.7	20.8	17.2	19.4	>sp|Q8TCS8|PNPT1_HUMAN Polyribonucleotide nucleotidyltransferase 1, mitochondrial OS=Homo sapiens GN=PNPT1 PE=1 SV=2
Ribonucleoside-diphosphate reductase (Fragment) OS		77.625	0.126448	-0.251635	0.516419	-1.61092	0.339594	275	70123000	22058000	23478000	29126000	8760500	12205000	16738000	7931300	2844200	24259000	5366300	8428200	4	3	3	11.6	7.3	6.4	6.4	>tr|B4DS95|B4DS95_HUMAN Ribonucleoside-diphosphate reductase (Fragment) OS=Homo sapiens PE=2 SV=1;>tr|B4E0I8|B4E0I8_HUMAN Ribonucleoside-diphosphate reductase OS=Homo sapiens PE=2 SV=1;>tr|B4DNN4|B4DNN4_HUMAN Ribonucleoside-diphosphate reductase OS=Homo sa
Splicing factor 3B subunit 1 OS	SF3B1	145.83	0.125632	-0.271511	-1.02157	1.20802	-1.00098	263	175100000	69779000	54026000	99739000	47944000	20925000	36802000	7982600	21896000	38558000	13853000	11205000	10	9	7	13.1	11	11	7.1	>sp|O75533|SF3B1_HUMAN Splicing factor 3B subunit 1 OS=Homo sapiens GN=SF3B1 PE=1 SV=3;>tr|A0JLT9|A0JLT9_HUMAN SF3B1 protein (Fragment) OS=Homo sapiens GN=SF3B1 PE=2 SV=1;>tr|Q32Q20|Q32Q20_HUMAN SF3B1 protein (Fragment) OS=Homo sapiens GN=SF3B1 PE=1 SV=1;>
40S ribosomal protein S3 OS	RPS3	26.688	0.125587	-0.151473	0.300417	-0.975907	0.221073	371	1056400000	339180000	353780000	462700000	157210000	156170000	289080000	110620000	76043000	304600000	71357000	121570000	12	10	11	53.1	53.1	47.7	49.8	>sp|P23396|RS3_HUMAN 40S ribosomal protein S3 OS=Homo sapiens GN=RPS3 PE=1 SV=2;>tr|E9PPU1|E9PPU1_HUMAN 40S ribosomal protein S3 OS=Homo sapiens GN=RPS3 PE=1 SV=1;>tr|E9PL09|E9PL09_HUMAN 40S ribosomal protein S3 OS=Homo sapiens GN=RPS3 PE=1 SV=1;>tr|Q53G83
Thymopentin OS	TMPO	46.306	0.125377	0.159191	-0.339692	1.02496	-0.207694	757	58387000	18690000	21634000	27466000	10928000	7718000	18156000	4535700	8870400	12764000	3226200	5045500	2	3	2	28.5	13.8	28.5	15.5	>tr|G5E972|G5E972_HUMAN Thymopentin OS=Homo sapiens GN=TMPO PE=1 SV=1;>tr|A0A024RBE7|A0A024RBE7_HUMAN Thymopoietin, isoform CRA_c OS=Homo sapiens GN=TMPO PE=4 SV=1;>sp|P42167|LAP2B_HUMAN Lamina-associated polypeptide 2, isoforms beta/gamma OS=Homo sapiens
Phosphatidylinositide phosphatase SAC1 OS	SACM1L	55.571	0.125153	-0.0416336	0.179638	-0.198709	-0.10583	523	106570000	47067000	30656000	55034000	30566000	11408000	21682000	7076100	7112100	29859000	9424300	12135000	4	4	4	12.4	9.5	10.1	10.1	>tr|E9PGZ4|E9PGZ4_HUMAN Phosphatidylinositide phosphatase SAC1 OS=Homo sapiens GN=SACM1L PE=1 SV=1;>tr|B4DVV3|B4DVV3_HUMAN cDNA FLJ53218, highly similar to Homo sapiens SAC1 suppressor of actin mutations 1-like (SACM1L), mRNA OS=Homo sapiens PE=2 SV=1;>sp|
Isoform 2 of Bifunctional methylenetetrahydrofolate dehydrogenase/cyclohydrolase, mitochondrial OS	MTHFD2	26.849	0.123282	-0.0417243	0.0893625	0.0578315	-0.272367	522	60260000	19943000	19965000	34415000	13300000	10788000	5236900	1496100	1851800	20608000	5147000	7324600	4	2	3	28.6	28.6	15.3	20.2	>sp|P13995-2|MTDC_HUMAN Isoform 2 of Bifunctional methylenetetrahydrofolate dehydrogenase/cyclohydrolase, mitochondrial OS=Homo sapiens GN=MTHFD2;>tr|B2R7W0|B2R7W0_HUMAN cDNA, FLJ93628, Homo sapiens methylene tetrahydrofolate dehydrogenase (NAD+dependent),
Spectrin, beta, non-erythrocytic 1, isoform CRA	SPTBN1	264.44	0.122826	-0.212845	-0.00290272	0.691534	-1.32717	305	623480000	236900000	208370000	283540000	100430000	88008000	113800000	28095000	55588000	226140000	108380000	64777000	31	20	30	23.7	19.8	12	19.1	>tr|D6W5C0|D6W5C0_HUMAN Spectrin, beta, non-erythrocytic 1, isoform CRA_b OS=Homo sapiens GN=SPTBN1 PE=4 SV=1;>tr|B2ZZ89|B2ZZ89_HUMAN Epididymis luminal protein 102 OS=Homo sapiens GN=SPTBN1 PE=2 SV=1;>sp|Q01082|SPTB2_HUMAN Spectrin beta chain, non-erythro
Mitochondrial ribonuclease P protein 1 OS	TRMT10C	47.346	0.122569	-0.0295137	-0.178518	-0.0154326	0.10541	545	282230000	96938000	95507000	151870000	59955000	46805000	59485000	17731000	20250000	70870000	19253000	28452000	11	9	8	40.9	36.5	28.5	24.1	>sp|Q7L0Y3|MRRP1_HUMAN Mitochondrial ribonuclease P protein 1 OS=Homo sapiens GN=TRMT10C PE=1 SV=2;>tr|C9JVB6|C9JVB6_HUMAN Mitochondrial ribonuclease P protein 1 (Fragment) OS=Homo sapiens GN=TRMT10C PE=1 SV=1
Tyrosine--tRNA ligase, cytoplasmic OS	YARS	59.143	0.120882	-0.320355	0.754374	-2.11772	0.402286	212	38047000	11985000	12107000	16226000	3953500	5940000	11608000	5749800	1693100	10213000	2281700	4474000	4	5	3	11.7	8.1	10.2	6.6	>sp|P54577|SYYC_HUMAN Tyrosine--tRNA ligase, cytoplasmic OS=Homo sapiens GN=YARS PE=1 SV=4
Ethylmalonic encephalopathy 1, isoform CRA	ETHE1	24.956	0.120011	-0.0222328	0.0915306	-0.0314595	-0.126769	564	80160000	19564000	28966000	20993000	6899700	7778600	29782000	7418900	12504000	29385000	5245200	8683900	3	4	2	20.3	14.5	20.3	11.9	>tr|B2RCZ7|B2RCZ7_HUMAN Ethylmalonic encephalopathy 1, isoform CRA_a OS=Homo sapiens GN=ETHE1 PE=2 SV=1;>sp|O95571|ETHE1_HUMAN Persulfide dioxygenase ETHE1, mitochondrial OS=Homo sapiens GN=ETHE1 PE=1 SV=2;>tr|M0QXB5|M0QXB5_HUMAN Persulfide dioxygenase ETH
cDNA FLJ61714, highly similar to Tripeptidyl-peptidase 2 (EC 3.4.14.10) (Fragment) OS		117.96	0.119674	0.115291	0.205267	-0.493337	0.633943	727	75631000	32712000	22042000	28139000	8206800	10842000	14336000	5012200	3980700	33156000	19493000	7219700	4	4	4	9.6	4.7	5.6	6.4	>tr|B7Z920|B7Z920_HUMAN cDNA FLJ61714, highly similar to Tripeptidyl-peptidase 2 (EC 3.4.14.10) (Fragment) OS=Homo sapiens PE=2 SV=1;>sp|P29144|TPP2_HUMAN Tripeptidyl-peptidase 2 OS=Homo sapiens GN=TPP2 PE=1 SV=4;>tr|Q5VZU9|Q5VZU9_HUMAN Tripeptidyl-peptida
Alpha-mannosidase OS	MAN2A1	131.04	0.119566	0.0576368	0.36793	-0.191524	-0.00349557	667	55520000	16534000	20497000	27533000	8487100	10374000	9178300	2108000	2578700	18809000	5939000	7544400	4	3	4	6	6	4.5	6	>tr|A5PKX5|A5PKX5_HUMAN Alpha-mannosidase OS=Homo sapiens GN=MAN2A1 PE=2 SV=1;>sp|Q16706|MA2A1_HUMAN Alpha-mannosidase 2 OS=Homo sapiens GN=MAN2A1 PE=1 SV=2
Epididymis secretory protein Li 45 OS	HEL-S-45	77.328	0.119154	-0.353381	1.06812	-2.30943	0.181166	184	1269000000	415980000	401870000	482770000	103500000	218400000	487320000	232260000	61807000	298930000	80219000	121670000	13	14	12	29.4	27.2	29.4	26.2	>tr|V9HWG3|V9HWG3_HUMAN Epididymis secretory protein Li 45 OS=Homo sapiens GN=HEL-S-45 PE=2 SV=1;>sp|P21980|TGM2_HUMAN Protein-glutamine gamma-glutamyltransferase 2 OS=Homo sapiens GN=TGM2 PE=1 SV=2;>tr|B4DIT7|B4DIT7_HUMAN cDNA FLJ58187, highly similar to
Heat shock 60kDa protein 1 (Chaperonin), isoform CRA	HSPD1	61.054	0.118973	0.0455369	0.161694	-0.214876	0.189793	654	1268500000	376950000	456690000	419010000	131710000	141370000	446520000	134100000	142660000	402920000	111140000	172670000	5	7	5	67	59	62.1	63.9	>tr|A0A024R3X4|A0A024R3X4_HUMAN Heat shock 60kDa protein 1 (Chaperonin), isoform CRA_a OS=Homo sapiens GN=HSPD1 PE=3 SV=1;>sp|P10809|CH60_HUMAN 60 kDa heat shock protein, mitochondrial OS=Homo sapiens GN=HSPD1 PE=1 SV=2;>tr|B7Z597|B7Z597_HUMAN cDNA FLJ5437
Isoform 2 of Endoplasmic reticulum-Golgi intermediate compartment protein 1 OS	ERGIC1	22.16	0.118622	-0.028998	0.137372	-0.104511	-0.119855	550	478570000	160550000	165540000	247070000	86096000	88544000	128360000	33316000	41718000	103150000	41137000	35275000	7	7	5	41.9	41.9	41.9	30.3	>sp|Q969X5-2|ERGI1_HUMAN Isoform 2 of Endoplasmic reticulum-Golgi intermediate compartment protein 1 OS=Homo sapiens GN=ERGIC1;>tr|B4E0N6|B4E0N6_HUMAN cDNA FLJ56280, highly similar to Endoplasmic reticulum-Golgi intermediate compartment protein 1 OS=Homo s
5-nucleotidase domain-containing protein 1 OS	NT5DC1	51.844	0.117731	-0.102268	0.100036	-0.684944	0.278104	420	28457000	8961700	9564800	12252000	4203900	3913500	6644000	2132400	1684000	9561200	2625500	3967300	2	2	3	11	6.4	6.4	11	>sp|Q5TFE4|NT5D1_HUMAN 5-nucleotidase domain-containing protein 1 OS=Homo sapiens GN=NT5DC1 PE=1 SV=1;>sp|Q5TFE4-2|NT5D1_HUMAN Isoform 2 of 5-nucleotidase domain-containing protein 1 OS=Homo sapiens GN=NT5DC1;>tr|A8K2Z3|A8K2Z3_HUMAN cDNA FLJ76092, highly
ATP-dependent RNA helicase SUPV3L1, mitochondrial OS	SUPV3L1	87.99	0.117009	-0.0164081	-0.033289	-0.0893441	0.0734089	573	97351000	33874000	33526000	46137000	18984000	14192000	19406000	6098500	6252000	31809000	8791400	13082000	7	4	5	15.4	13.4	7.4	9.7	>sp|Q8IYB8|SUV3_HUMAN ATP-dependent RNA helicase SUPV3L1, mitochondrial OS=Homo sapiens GN=SUPV3L1 PE=1 SV=1;>tr|B7Z611|B7Z611_HUMAN cDNA FLJ50848, highly similar to Homo sapiens suppressor of var1, 3-like 1 (S. cerevisiae) (SUPV3L1), mRNA (Fragment) OS=Ho
Isoform 2 of Very long-chain specific acyl-CoA dehydrogenase, mitochondrial OS	ACADVL	68.058	0.116991	0.0825651	-0.393975	0.373954	0.267716	695	872670000	262030000	314770000	376790000	146100000	112470000	261620000	58135000	112410000	234260000	57790000	89891000	17	17	15	41.7	36.5	38.1	34.8	>sp|P49748-2|ACADV_HUMAN Isoform 2 of Very long-chain specific acyl-CoA dehydrogenase, mitochondrial OS=Homo sapiens GN=ACADVL;>tr|Q53HR2|Q53HR2_HUMAN Acyl-Coenzyme A dehydrogenase, very long chain variant (Fragment) OS=Homo sapiens PE=2 SV=1;>sp|P49748|AC
cDNA FLJ78244, highly similar to Homo sapiens eukaryotic translation initiation factor 4A, isoform 1 (EIF4A1), mRNA OS		46.121	0.116905	-0.294843	0.591488	-2.01147	0.535456	236	747370000	247190000	246070000	289550000	86932000	117180000	227720000	112610000	34641000	230100000	47647000	94248000	11	12	9	36.9	34.5	36.9	28.6	>tr|A8K7F6|A8K7F6_HUMAN cDNA FLJ78244, highly similar to Homo sapiens eukaryotic translation initiation factor 4A, isoform 1 (EIF4A1), mRNA OS=Homo sapiens PE=2 SV=1;>sp|P60842|IF4A1_HUMAN Eukaryotic initiation factor 4A-I OS=Homo sapiens GN=EIF4A1 PE=1 SV
Plectin OS	PLEC	531.78	0.116583	-0.248799	0.0953169	0.801241	-1.64295	277	241300000	105920000	75965000	86899000	30518000	28068000	26175000	6187200	13128000	128220000	69214000	34768000	10	7	16	6.8	3.5	2.6	4.7	>sp|Q15149|PLEC_HUMAN Plectin OS=Homo sapiens GN=PLEC PE=1 SV=3;>sp|Q15149-7|PLEC_HUMAN Isoform 7 of Plectin OS=Homo sapiens GN=PLEC;>sp|Q15149-8|PLEC_HUMAN Isoform 8 of Plectin OS=Homo sapiens GN=PLEC;>sp|Q15149-9|PLEC_HUMAN Isoform 9 of Plectin OS=Homo s
Solute carrier family 27 (Fatty acid transporter), member 2 variant (Fragment) OS		70.277	0.114387	-0.0642894	0.295605	-0.355073	-0.133401	481	655110000	207660000	231030000	271360000	85417000	95868000	164210000	50887000	53123000	219540000	71358000	82035000	13	11	11	26.8	26.6	22.9	25.2	>tr|Q53GS2|Q53GS2_HUMAN Solute carrier family 27 (Fatty acid transporter), member 2 variant (Fragment) OS=Homo sapiens PE=2 SV=1;>sp|O14975|S27A2_HUMAN Very long-chain acyl-CoA synthetase OS=Homo sapiens GN=SLC27A2 PE=1 SV=2;>sp|O14975-2|S27A2_HUMAN Isofor
Isoform DeltaLf of Lactotransferrin OS	LTF	73.16	0.113637	-0.691332	-4.70802	2.15863	0.475396	23	36740000	15576000	11275000	16449000	13752000	647680	10618000	1316900	9136700	9672400	507270	1490400	3	4	2	8.9	6.2	8.9	4.8	>sp|P02788-2|TRFL_HUMAN Isoform DeltaLf of Lactotransferrin OS=Homo sapiens GN=LTF;>tr|E7EQB2|E7EQB2_HUMAN Lactotransferrin (Fragment) OS=Homo sapiens GN=LTF PE=1 SV=1;>tr|E7ER44|E7ER44_HUMAN Lactotransferrin OS=Homo sapiens GN=LTF PE=1 SV=1;>tr|V9HWI4|V9H
Fatty acid-binding protein, epidermal OS	FABP5	11.257	0.113365	-0.425488	-2.8045	1.55685	-0.0288078	140	51576000	19726000	17461000	19062000	14393000	2296400	21157000	4066600	13250000	11357000	1266000	1914500	2	3	2	45.5	24.8	45.5	34.7	>tr|I6L8B7|I6L8B7_HUMAN Fatty acid-binding protein, epidermal OS=Homo sapiens GN=FABP5 PE=1 SV=1;>tr|E7DVW5|E7DVW5_HUMAN Fatty acid binding protein 5 (Psoriasis-associated) OS=Homo sapiens GN=FABP5 PE=3 SV=1;>sp|Q01469|FABP5_HUMAN Fatty acid-binding protei
RAN binding protein 5, isoform CRA	RANBP5	123.63	0.11258	-0.175656	0.549916	-1.20663	0.129745	343	95768000	29370000	31214000	38839000	11187000	13665000	25639000	11041000	4745700	31289000	7141600	12803000	7	6	5	12.5	10.1	9.1	6.4	>tr|A0A024RDY0|A0A024RDY0_HUMAN RAN binding protein 5, isoform CRA_d OS=Homo sapiens GN=RANBP5 PE=4 SV=1;>sp|O00410|IPO5_HUMAN Importin-5 OS=Homo sapiens GN=IPO5 PE=1 SV=4;>sp|O00410-3|IPO5_HUMAN Isoform 3 of Importin-5 OS=Homo sapiens GN=IPO5;>tr|B4E0R6|B
Fusion (Involved in t(12;16) in malignant liposarcoma) isoform a variant (Fragment) OS		31.994	0.112475	-0.17458	-0.692875	0.878921	-0.709788	345	67163000	17694000	37532000	16547000	6984100	4397300	37542000	5552200	29765000	13075000	5157200	3369700	2	2	2	15.7	11	12.7	11	>tr|Q59H57|Q59H57_HUMAN Fusion (Involved in t(12;16) in malignant liposarcoma) isoform a variant (Fragment) OS=Homo sapiens PE=2 SV=1;>tr|B4DR70|B4DR70_HUMAN cDNA FLJ58049, highly similar to RNA-binding protein FUS OS=Homo sapiens PE=2 SV=1;>tr|A8K4H1|A8K4
FAS-associated factor 2 OS	FAF2	52.623	0.11172	-0.0173415	0.0820213	-0.0368219	-0.097224	570	73202000	21962000	25553000	31065000	10127000	9248000	21080000	6142700	6961600	21057000	5692300	9343600	3	2	2	11	11	7.2	7.2	>sp|Q96CS3|FAF2_HUMAN FAS-associated factor 2 OS=Homo sapiens GN=FAF2 PE=1 SV=2;>tr|B4E2M8|B4E2M8_HUMAN cDNA FLJ61076, highly similar to UBX domain-containing protein 8 OS=Homo sapiens PE=2 SV=1
Serine/threonine-protein phosphatase 2A 65 kDa regulatory subunit A alpha isoform OS	PPP2R1A	45.604	0.11094	-0.101625	0.283448	-0.71622	0.127897	421	83711000	29248000	25883000	31340000	11185000	10932000	29424000	11569000	6782100	22947000	6493900	8168800	4	3	4	18.3	16.3	13.4	13.4	>tr|B3KQV6|B3KQV6_HUMAN Serine/threonine-protein phosphatase 2A 65 kDa regulatory subunit A alpha isoform OS=Homo sapiens GN=PPP2R1A PE=1 SV=1;>tr|Q8NB89|Q8NB89_HUMAN cDNA FLJ34068 fis, clone FCBBF3001918, highly similar to SERINE/THREONINE PROTEIN PHOSPHA
Isoform 4 of Mitochondrial antiviral-signaling protein OS	MAVS	40.467	0.110931	0.20041	-0.880498	1.24001	0.241718	769	51882000	11959000	17941000	11694000	4527800	3079400	18383000	3776300	8778400	21805000	3655400	6082900	2	3	3	12.8	7	12.8	12.8	>sp|Q7Z434-4|MAVS_HUMAN Isoform 4 of Mitochondrial antiviral-signaling protein OS=Homo sapiens GN=MAVS;>tr|M1P2Z0|M1P2Z0_HUMAN Mitochondrial antiviral signaling protein OS=Homo sapiens GN=MAVS PE=2 SV=1;>sp|Q7Z434|MAVS_HUMAN Mitochondrial antiviral-signali
Isoform 3 of Spectrin alpha chain, non-erythrocytic 1 OS	SPTAN1	282.28	0.110101	-0.170361	0.067088	0.595408	-1.17358	351	437300000	174170000	142440000	214630000	72366000	69854000	53912000	19317000	20543000	168770000	82487000	52043000	23	17	25	19.2	14.2	10.2	14.9	>sp|Q13813-3|SPTN1_HUMAN Isoform 3 of Spectrin alpha chain, non-erythrocytic 1 OS=Homo sapiens GN=SPTAN1;>sp|Q13813|SPTN1_HUMAN Spectrin alpha chain, non-erythrocytic 1 OS=Homo sapiens GN=SPTAN1 PE=1 SV=3;>tr|A0A024R889|A0A024R889_HUMAN Spectrin, alpha, no
NADH dehydrogenase OS		40.676	0.108841	0.0452175	-0.235008	0.206518	0.164143	653	454310000	138020000	146970000	242960000	81580000	65740000	82980000	24069000	32534000	128370000	32367000	48694000	7	6	6	22.3	22.3	19.8	18.9	>tr|Q7Z518|Q7Z518_HUMAN NADH dehydrogenase OS=Homo sapiens PE=2 SV=1;>tr|A8K413|A8K413_HUMAN cDNA FLJ76144, highly similar to Homo sapiens NADH dehydrogenase (ubiquinone) 1 alpha subcomplex, 10, 42kDa (NDUFA10), mRNA OS=Homo sapiens PE=2 SV=1;>tr|A0A087WXC
Isoform 2 of Unconventional myosin-Ic OS	MYO1C	117.91	0.108368	-0.162893	-0.153045	0.713256	-1.04889	358	25521000	9135700	8881400	9347000	3178300	3055100	4091300	1147800	1861300	12083000	4809600	3965000	4	3	5	10.4	6.9	5.4	8.3	>sp|O00159-2|MYO1C_HUMAN Isoform 2 of Unconventional myosin-Ic OS=Homo sapiens GN=MYO1C;>tr|F5H6E2|F5H6E2_HUMAN Unconventional myosin-Ic OS=Homo sapiens GN=MYO1C PE=1 SV=1;>tr|B7Z3E5|B7Z3E5_HUMAN cDNA FLJ53573, highly similar to Myosin Ic OS=Homo sapiens P
Protein kinase C inhibitor-2 OS		13.918	0.107297	-0.0978838	-0.689823	0.348912	0.0472592	428	177150000	72448000	52548000	83406000	48851000	17943000	47958000	12859000	19459000	45788000	10737000	15146000	3	3	3	39.8	39.8	39.8	39.8	>tr|Q8WYJ5|Q8WYJ5_HUMAN Protein kinase C inhibitor-2 OS=Homo sapiens PE=2 SV=1;>tr|Q53HJ8|Q53HJ8_HUMAN PKCI-1-related HIT protein variant (Fragment) OS=Homo sapiens PE=2 SV=1;>sp|Q9BX68|HINT2_HUMAN Histidine triad nucleotide-binding protein 2, mitochondria
3-ketoacyl-CoA thiolase, peroxisomal (Fragment) OS	ACAA1	30.222	0.106938	-0.0363078	-0.0122425	0.149389	-0.24607	531	43653000	12838000	14385000	13303000	4700400	4016400	14498000	3738200	5902500	15852000	4399000	4465800	2	3	3	19	14.5	19	19	>tr|H7C131|H7C131_HUMAN 3-ketoacyl-CoA thiolase, peroxisomal (Fragment) OS=Homo sapiens GN=ACAA1 PE=1 SV=1;>tr|Q8NCW8|Q8NCW8_HUMAN 3-oxoacyl-CoA thiolase (Fragment) OS=Homo sapiens PE=2 SV=1;>tr|B4DEN6|B4DEN6_HUMAN cDNA FLJ55549, highly similar to 3-ketoac
Epidermal growth factor receptor variant A OS	EGFR	125.8	0.106755	-0.0735384	-0.36602	0.38659	-0.241185	463	202620000	66408000	70528000	84242000	33100000	22797000	68945000	17367000	28713000	49433000	15941000	19017000	10	9	7	14.2	12.1	12.1	9.2	>tr|E7BSV0|E7BSV0_HUMAN Epidermal growth factor receptor variant A OS=Homo sapiens GN=EGFR PE=2 SV=1;>tr|Q2TTR7|Q2TTR7_HUMAN Cell growth inhibiting protein 40 OS=Homo sapiens PE=2 SV=1;>tr|A9CB80|A9CB80_HUMAN Cell proliferation-inducing protein 61 OS=Homo
Epididymis secretory sperm binding protein Li 66p OS	HEL-S-66p	32.66	0.10553	-0.177022	0.507922	-1.3013	0.262313	338	74001000	23289000	24451000	21666000	6406600	8727300	21132000	8297100	4146800	31203000	8585700	11577000	3	3	4	32.9	14.5	15.6	24.6	>tr|V9HWB5|V9HWB5_HUMAN Epididymis secretory sperm binding protein Li 66p OS=Homo sapiens GN=HEL-S-66p PE=2 SV=1;>sp|Q15181|IPYR_HUMAN Inorganic pyrophosphatase OS=Homo sapiens GN=PPA1 PE=1 SV=2
ATP synthase F(0) complex subunit B1, mitochondrial OS	ATP5F1	22.275	0.105215	-0.0300968	-0.0100908	0.126312	-0.206512	544	250330000	79635000	95263000	94576000	33799000	36142000	71660000	20751000	23741000	84097000	25085000	35380000	3	3	2	19	19	19	13.3	>tr|Q5QNZ2|Q5QNZ2_HUMAN ATP synthase F(0) complex subunit B1, mitochondrial OS=Homo sapiens GN=ATP5F1 PE=1 SV=1;>tr|Q08ET0|Q08ET0_HUMAN Cell proliferation-inducing protein 47 OS=Homo sapiens GN=hCG_39985 PE=2 SV=1;>tr|A8K4W2|A8K4W2_HUMAN cDNA FLJ78635, hig
D-glucuronyl C5-epimerase OS	GLCE	62.886	0.105078	0.208979	-1.01835	1.29502	0.350271	772	64215000	21780000	21954000	22365000	13285000	5438100	20229000	4403000	9725000	21620000	4091600	6790500	4	4	4	12.5	12.5	12.5	12.5	>tr|H0YNP1|H0YNP1_HUMAN D-glucuronyl C5-epimerase OS=Homo sapiens GN=GLCE PE=4 SV=1;>sp|O94923|GLCE_HUMAN D-glucuronyl C5-epimerase OS=Homo sapiens GN=GLCE PE=1 SV=3;>tr|B3KML4|B3KML4_HUMAN cDNA FLJ11326 fis, clone PLACE1010481, highly similar to D-glucuro
cDNA FLJ75876, highly similar to Homo sapiens solute carrier family 38, member 2 (SLC38A2), mRNA OS		56.053	0.104054	-0.159479	0.811882	-0.952852	-0.337466	364	78315000	25903000	26325000	27645000	8118400	12188000	30381000	9729900	6638800	20289000	8054600	7497800	2	3	2	12.3	7.3	12.3	7.3	>tr|A8K6H9|A8K6H9_HUMAN cDNA FLJ75876, highly similar to Homo sapiens solute carrier family 38, member 2 (SLC38A2), mRNA OS=Homo sapiens PE=2 SV=1;>tr|A0A024R0W3|A0A024R0W3_HUMAN Solute carrier family 38, member 2, isoform CRA_b OS=Homo sapiens GN=SLC38A2
Ubiquitin (Fragment) OS	UBB	10.469	0.103068	-0.0513579	-0.373533	0.0270125	0.192447	502	833630000	232160000	258770000	277410000	110160000	76690000	295680000	73595000	99784000	260540000	48412000	82292000	3	3	3	43	43	43	43	>tr|J3QS39|J3QS39_HUMAN Ubiquitin (Fragment) OS=Homo sapiens GN=UBB PE=4 SV=1;>tr|J3QTR3|J3QTR3_HUMAN Ubiquitin (Fragment) OS=Homo sapiens GN=RPS27A PE=1 SV=1;>tr|F5H6Q2|F5H6Q2_HUMAN Polyubiquitin-C (Fragment) OS=Homo sapiens GN=UBC PE=4 SV=3;>tr|Q3MIH3|Q3
Cytochrome b-c1 complex subunit 2, mitochondrial OS	UQCRC2	48.442	0.102993	0.0264318	-0.0371475	0.197614	-0.0811711	628	1120800000	356770000	400070000	471300000	173540000	150200000	268380000	70380000	106090000	381180000	112860000	143780000	13	13	14	42.2	37.5	38.2	42.2	>sp|P22695|QCR2_HUMAN Cytochrome b-c1 complex subunit 2, mitochondrial OS=Homo sapiens GN=UQCRC2 PE=1 SV=3;>tr|H3BRG4|H3BRG4_HUMAN Cytochrome b-c1 complex subunit 2, mitochondrial OS=Homo sapiens GN=UQCRC2 PE=1 SV=1;>tr|H3BSJ9|H3BSJ9_HUMAN Cytochrome b-c1
Isoform 2 of Nodal modulator 2 OS	NOMO2	134.19	0.102931	0.0307467	0.115166	0.146916	-0.169842	635	358010000	118690000	123240000	139420000	49370000	46284000	99009000	33268000	32462000	119580000	36054000	44495000	15	13	13	19.9	19	16.1	16.8	>sp|Q5JPE7-2|NOMO2_HUMAN Isoform 2 of Nodal modulator 2 OS=Homo sapiens GN=NOMO2;>sp|Q15155|NOMO1_HUMAN Nodal modulator 1 OS=Homo sapiens GN=NOMO1 PE=1 SV=5;>sp|P69849|NOMO3_HUMAN Nodal modulator 3 OS=Homo sapiens GN=NOMO3 PE=2 SV=2;>tr|J3KN36|J3KN36_HUMAN
Isoform 2 of Electron transfer flavoprotein subunit alpha, mitochondrial OS	ETFA	30.025	0.102892	0.0768978	-0.378719	0.491186	0.118227	688	843610000	285260000	297550000	407310000	174530000	124740000	177270000	42348000	69496000	259030000	68387000	103310000	11	10	11	58.8	58.8	53.2	58.8	>sp|P13804-2|ETFA_HUMAN Isoform 2 of Electron transfer flavoprotein subunit alpha, mitochondrial OS=Homo sapiens GN=ETFA;>sp|P13804|ETFA_HUMAN Electron transfer flavoprotein subunit alpha, mitochondrial OS=Homo sapiens GN=ETFA PE=1 SV=1;>tr|H0YL12|H0YL12_H
cDNA FLJ53399, highly similar to Monocarboxylate transporter 1 OS		51.878	0.102488	0.0446064	0.296428	-0.211682	0.0490731	652	94527000	29776000	32451000	32493000	10231000	10431000	28222000	10256000	8870000	33812000	9288900	13150000	3	3	4	7.3	6.7	7.3	7.3	>tr|B4E106|B4E106_HUMAN cDNA FLJ53399, highly similar to Monocarboxylate transporter 1 OS=Homo sapiens PE=2 SV=1;>tr|B4DKS0|B4DKS0_HUMAN cDNA FLJ53381, highly similar to Monocarboxylate transporter 1 OS=Homo sapiens PE=2 SV=1;>tr|A0A024R0H1|A0A024R0H1_HUMA
NNMT protein OS	NNMT	29.574	0.102138	-0.236633	0.586308	-1.79721	0.501006	286	152750000	48275000	51151000	67568000	19246000	26750000	42007000	18852000	6492800	43173000	10176000	17908000	6	4	3	24.2	24.2	15.2	10.6	>tr|Q6FH49|Q6FH49_HUMAN NNMT protein OS=Homo sapiens GN=NNMT PE=1 SV=1;>sp|P40261|NNMT_HUMAN Nicotinamide N-methyltransferase OS=Homo sapiens GN=NNMT PE=1 SV=1
Alkyldihydroxyacetonephosphate synthase, peroxisomal OS	AGPS	72.911	0.101771	0.0338955	0.257011	-0.0569114	-0.0984129	641	301450000	94351000	113540000	135610000	46127000	49356000	75720000	20373000	28326000	90114000	27851000	35858000	10	9	9	21.4	20.1	20.8	17.9	>sp|O00116|ADAS_HUMAN Alkyldihydroxyacetonephosphate synthase, peroxisomal OS=Homo sapiens GN=AGPS PE=1 SV=1;>tr|B7Z3Q4|B7Z3Q4_HUMAN cDNA FLJ51873, highly similar to Alkyldihydroxyacetonephosphate synthase, peroxisomal (EC 2.5.1.26) OS=Homo sapiens PE=2 SV
cDNA, FLJ95058, highly similar to Homo sapiens carnitine palmitoyltransferase 1A (liver) (CPT1A),nuclear gene encoding mitochondrial protein, mRNA OS		88.339	0.0977631	0.179156	-0.68499	1.37067	-0.148209	763	120140000	41297000	42091000	53407000	25621000	14333000	31702000	6128600	16753000	35030000	9547600	11005000	5	5	4	10.5	10.5	10.5	8.3	>tr|B2RAQ8|B2RAQ8_HUMAN cDNA, FLJ95058, highly similar to Homo sapiens carnitine palmitoyltransferase 1A (liver) (CPT1A),nuclear gene encoding mitochondrial protein, mRNA OS=Homo sapiens PE=2 SV=1;>tr|A0A024R5F4|A0A024R5F4_HUMAN Carnitine palmitoyltransfer
Cell growth-inhibiting protein 34 OS		20.094	0.0975712	-0.0925169	0.244156	-0.7291	0.207393	435	538670000	161050000	191540000	248760000	72000000	91648000	131480000	48178000	29468000	158430000	40876000	70425000	2	2	2	13	13	13	13	>tr|Q08ES8|Q08ES8_HUMAN Cell growth-inhibiting protein 34 OS=Homo sapiens PE=2 SV=1;>sp|P62913-2|RL11_HUMAN Isoform 2 of 60S ribosomal protein L11 OS=Homo sapiens GN=RPL11;>tr|Q5VVD0|Q5VVD0_HUMAN Ribosomal protein L11, isoform CRA_b OS=Homo sapiens GN=RPL1
Stomatin, isoform CRA	STOM	31.73	0.0972543	0.0706507	-0.286058	0.537246	-0.0392363	682	56285000	17687000	18628000	21815000	9097500	6651300	16203000	3811700	6161600	18266000	4777600	5814900	3	2	4	23.3	16.3	12.2	23.3	>tr|A0A024R882|A0A024R882_HUMAN Stomatin, isoform CRA_a OS=Homo sapiens GN=STOM PE=4 SV=1;>sp|P27105|STOM_HUMAN Erythrocyte band 7 integral membrane protein OS=Homo sapiens GN=STOM PE=1 SV=3;>sp|P27105-2|STOM_HUMAN Isoform 2 of Erythrocyte band 7 integral
NPC-A-16 OS	RPL9	21.863	0.096953	-0.128475	0.338795	-1.01783	0.293606	394	424760000	135620000	138630000	214940000	66770000	73902000	105300000	42779000	22577000	104520000	26071000	42153000	4	4	4	26	26	26	26	>tr|Q53Z07|Q53Z07_HUMAN NPC-A-16 OS=Homo sapiens GN=RPL9 PE=2 SV=1;>sp|P32969|RL9_HUMAN 60S ribosomal protein L9 OS=Homo sapiens GN=RPL9 PE=1 SV=1;>tr|E7ESE0|E7ESE0_HUMAN 60S ribosomal protein L9 (Fragment) OS=Homo sapiens GN=RPL9 PE=1 SV=1;>tr|D6RAN4|D6RA
Erlin-2 (Fragment) OS	ERLIN2	37.725	0.0956418	-0.114036	-0.479754	0.684819	-0.547173	409	83756000	27732000	30555000	23534000	10235000	7503900	34592000	9121800	14356000	25630000	8375700	8695500	2	4	3	24	8	21	12.4	>tr|E5RHW4|E5RHW4_HUMAN Erlin-2 (Fragment) OS=Homo sapiens GN=ERLIN2 PE=1 SV=1;>sp|O94905|ERLN2_HUMAN Erlin-2 OS=Homo sapiens GN=ERLIN2 PE=1 SV=1;>tr|E5RJ09|E5RJ09_HUMAN Erlin-2 (Fragment) OS=Homo sapiens GN=ERLIN2 PE=1 SV=1
cDNA FLJ76877, highly similar to Homo sapiens superkiller viralicidic activity 2-like 2 (SKIV2L2), mRNA OS		117.9	0.095125	-0.119954	-0.527991	0.725436	-0.557306	403	59102000	21800000	19528000	27071000	12969000	7041200	17335000	4314300	7488200	14696000	4516500	4998200	5	4	3	7.3	6.4	4.2	3.4	>tr|A8K6I4|A8K6I4_HUMAN cDNA FLJ76877, highly similar to Homo sapiens superkiller viralicidic activity 2-like 2 (SKIV2L2), mRNA OS=Homo sapiens PE=2 SV=1;>sp|P42285|SK2L2_HUMAN Superkiller viralicidic activity 2-like 2 OS=Homo sapiens GN=SKIV2L2 PE=1 SV=3;
Hsc70-interacting protein (Fragment) OS	ST13	16.219	0.0946679	-0.172888	0.253868	-1.37992	0.607389	349	43146000	14418000	12725000	15259000	4985000	4745900	12657000	6436000	2318300	15230000	2997400	5660700	3	3	3	29.5	24.7	22.6	24.7	>tr|H7C3I1|H7C3I1_HUMAN Hsc70-interacting protein (Fragment) OS=Homo sapiens GN=ST13 PE=4 SV=1;>tr|A0A087X1H6|A0A087X1H6_HUMAN Hsc70-interacting protein OS=Homo sapiens GN=ST13 PE=4 SV=1;>tr|Q1XBU6|Q1XBU6_HUMAN Aging-associated protein 14b OS=Homo sapiens
Isoform 6 of Cytosolic acyl coenzyme A thioester hydrolase OS	ACOT7	36.567	0.0942252	-0.143226	0.400429	-1.16101	0.330903	378	96585000	21304000	39909000	70139000	12777000	31239000	15567000	5723000	3945700	10878000	2804100	4723700	6	4	3	23.4	23.4	15.2	11.6	>sp|O00154-6|BACH_HUMAN Isoform 6 of Cytosolic acyl coenzyme A thioester hydrolase OS=Homo sapiens GN=ACOT7;>sp|O00154-4|BACH_HUMAN Isoform 4 of Cytosolic acyl coenzyme A thioester hydrolase OS=Homo sapiens GN=ACOT7;>sp|O00154-5|BACH_HUMAN Isoform 5 of Cyt
Isoform 3 of Acyl-coenzyme A thioesterase 9, mitochondrial OS	ACOT9	43.206	0.0926271	-0.0309395	0.147697	-0.236673	-0.00384265	543	496890000	158710000	177130000	264790000	92255000	88697000	95778000	28350000	31417000	136330000	38103000	57018000	12	8	9	38.3	38.3	24.5	30.9	>sp|Q9Y305-3|ACOT9_HUMAN Isoform 3 of Acyl-coenzyme A thioesterase 9, mitochondrial OS=Homo sapiens GN=ACOT9;>sp|Q9Y305-2|ACOT9_HUMAN Isoform 2 of Acyl-coenzyme A thioesterase 9, mitochondrial OS=Homo sapiens GN=ACOT9;>sp|Q9Y305|ACOT9_HUMAN Acyl-coenzyme A
Branched chain keto acid dehydrogenase E1, alpha polypeptide variant (Fragment) OS		50.399	0.0920555	-0.10063	-0.749305	0.516217	-0.0688011	423	25048000	9497900	7946600	11829000	5707800	3164500	7056100	2094700	2534300	6162100	1695300	2247800	2	2	2	9.5	5.9	5.9	5.9	>tr|Q59EI3|Q59EI3_HUMAN Branched chain keto acid dehydrogenase E1, alpha polypeptide variant (Fragment) OS=Homo sapiens PE=2 SV=1;>tr|B2R8A9|B2R8A9_HUMAN cDNA, FLJ93812, highly similar to Homo sapiens branched chain keto acid dehydrogenase E1, alphapolypep
cDNA FLJ56905, highly similar to ADP-dependent glucokinase (EC 2.7.1.147) OS		48.122	0.0918512	-0.0539441	0.223175	0.0486547	-0.433662	501	59180000	16873000	23224000	26478000	7534200	10183000	13068000	2843500	5769800	19635000	6495200	7271000	4	3	5	17.3	14.4	9.3	17.3	>tr|B4DG35|B4DG35_HUMAN cDNA FLJ56905, highly similar to ADP-dependent glucokinase (EC 2.7.1.147) OS=Homo sapiens PE=2 SV=1;>sp|Q9BRR6-2|ADPGK_HUMAN Isoform 2 of ADP-dependent glucokinase OS=Homo sapiens GN=ADPGK;>sp|Q9BRR6|ADPGK_HUMAN ADP-dependent glucok
cDNA FLJ75774, highly similar to Homo sapiens lectin, mannose-binding 2 (LMAN2), mRNA OS		40.242	0.0917042	-0.0176619	0.105142	-0.0453719	-0.112755	568	276820000	88830000	96914000	114820000	38884000	38886000	81710000	23846000	27307000	80296000	26100000	30721000	6	6	7	32.3	21.6	21.9	29.5	>tr|A8K7T4|A8K7T4_HUMAN cDNA FLJ75774, highly similar to Homo sapiens lectin, mannose-binding 2 (LMAN2), mRNA OS=Homo sapiens PE=2 SV=1;>sp|Q12907|LMAN2_HUMAN Vesicular integral-membrane protein VIP36 OS=Homo sapiens GN=LMAN2 PE=1 SV=1;>tr|B4DWN1|B4DWN1_HU
Short/branched chain specific acyl-CoA dehydrogenase, mitochondrial OS	ACADSB	47.485	0.0916223	-0.0223269	-0.170816	0.110096	-0.0062604	563	118690000	34343000	44032000	38830000	14482000	13125000	24553000	7382300	8861600	55306000	12479000	22045000	2	2	3	10.6	7.2	6.5	10.6	>sp|P45954|ACDSB_HUMAN Short/branched chain specific acyl-CoA dehydrogenase, mitochondrial OS=Homo sapiens GN=ACADSB PE=1 SV=1;>sp|P45954-2|ACDSB_HUMAN Isoform 2 of Short/branched chain specific acyl-CoA dehydrogenase, mitochondrial OS=Homo sapiens GN=ACAD
Isoform 2 of GDP-fucose protein O-fucosyltransferase 1 OS	POFUT1	22.338	0.0914152	-0.062453	0.322044	-0.468372	-0.0410311	486	29586000	9504400	10109000	12795000	3793500	4565500	8732300	3030500	2385700	8058300	2680400	3157300	2	2	2	9.8	9.8	9.8	9.8	>sp|Q9H488-2|OFUT1_HUMAN Isoform 2 of GDP-fucose protein O-fucosyltransferase 1 OS=Homo sapiens GN=POFUT1;>sp|Q9H488|OFUT1_HUMAN GDP-fucose protein O-fucosyltransferase 1 OS=Homo sapiens GN=POFUT1 PE=1 SV=1
Isoform 2 of Nucleophosmin OS	NPM1	29.464	0.0910417	-0.0698313	-0.259271	0.437547	-0.38777	469	2793500000	933490000	1004000000	969040000	377560000	268760000	778520000	200240000	337180000	1045900000	355690000	398080000	7	8	7	38.1	38.1	38.1	38.1	>sp|P06748-2|NPM_HUMAN Isoform 2 of Nucleophosmin OS=Homo sapiens GN=NPM1;>sp|P06748|NPM_HUMAN Nucleophosmin OS=Homo sapiens GN=NPM1 PE=1 SV=2;>sp|P06748-3|NPM_HUMAN Isoform 3 of Nucleophosmin OS=Homo sapiens GN=NPM1;>tr|A4ZU86|A4ZU86_HUMAN Truncated nucle
U5 small nuclear ribonucleoprotein 200 kDa helicase OS	SNRNP200	244.5	0.0906421	-0.0876253	-0.294951	0.545968	-0.513893	444	473850000	176580000	163350000	262220000	108210000	76775000	55808000	15596000	22681000	155820000	52767000	63890000	22	11	18	13.8	12.7	6.4	10	>sp|O75643|U520_HUMAN U5 small nuclear ribonucleoprotein 200 kDa helicase OS=Homo sapiens GN=SNRNP200 PE=1 SV=2;>tr|A4FU77|A4FU77_HUMAN SNRNP200 protein (Fragment) OS=Homo sapiens GN=SNRNP200 PE=2 SV=1
cDNA FLJ77740, highly similar to Homo sapiens 7-dehydrocholesterol reductase, mRNA OS		54.469	0.0890608	0.0175657	0.081067	0.0856966	-0.114066	622	180910000	57673000	67784000	35644000	12343000	12464000	75371000	22804000	28212000	69891000	22526000	27108000	2	3	3	9.1	7.4	9.1	9.1	>tr|A8K0D2|A8K0D2_HUMAN cDNA FLJ77740, highly similar to Homo sapiens 7-dehydrocholesterol reductase, mRNA OS=Homo sapiens PE=2 SV=1;>tr|A0A024R5F7|A0A024R5F7_HUMAN 7-dehydrocholesterol reductase, isoform CRA_a OS=Homo sapiens GN=DHCR7 PE=4 SV=1;>sp|Q9UBM7
cDNA, FLJ95650, highly similar to Homo sapiens karyopherin (importin) beta 1 (KPNB1), mRNA OS		97.183	0.0877153	-0.0649891	0.321582	-0.524749	0.0082	479	590190000	185750000	204740000	227320000	74555000	82710000	158840000	52935000	43517000	204030000	58258000	78513000	15	14	14	25.2	23.4	21.7	21.2	>tr|B2RBR9|B2RBR9_HUMAN cDNA, FLJ95650, highly similar to Homo sapiens karyopherin (importin) beta 1 (KPNB1), mRNA OS=Homo sapiens PE=2 SV=1;>sp|Q14974|IMB1_HUMAN Importin subunit beta-1 OS=Homo sapiens GN=KPNB1 PE=1 SV=2;>sp|Q14974-2|IMB1_HUMAN Isoform 2
Dimethyladenosine transferase 2, mitochondrial OS	TFB2M	45.348	0.0876938	-0.0552909	-0.38368	0.336283	-0.118476	495	35105000	13772000	10363000	27050000	11413000	7391700	3306500	1119700	1095600	4748500	1239300	1875400	5	2	3	14.9	14.9	5.3	9.3	>sp|Q9H5Q4|TFB2M_HUMAN Dimethyladenosine transferase 2, mitochondrial OS=Homo sapiens GN=TFB2M PE=1 SV=1;>tr|A0A024R5R8|A0A024R5R8_HUMAN Transcription factor B2, mitochondrial, isoform CRA_a OS=Homo sapiens GN=TFB2M PE=4 SV=1
Pre-mRNA-processing factor 19 OS	PRPF19	55.18	0.0872693	-0.129908	-0.668914	0.861161	-0.581972	393	256360000	97152000	90830000	107560000	46500000	27743000	76003000	19911000	38018000	72798000	30741000	25070000	7	7	4	28.8	26.8	25.4	10.3	>sp|Q9UMS4|PRP19_HUMAN Pre-mRNA-processing factor 19 OS=Homo sapiens GN=PRPF19 PE=1 SV=1
Thioredoxin OS	TXN	11.737	0.0870043	-0.0884981	-0.251745	-0.576712	0.562963	440	644640000	196620000	200910000	246670000	100400000	77337000	201950000	64368000	60421000	196030000	31854000	63148000	4	4	3	40	40	40	29.5	>tr|H9ZYJ2|H9ZYJ2_HUMAN Thioredoxin OS=Homo sapiens GN=TXN PE=2 SV=1;>sp|P10599|THIO_HUMAN Thioredoxin OS=Homo sapiens GN=TXN PE=1 SV=3;>sp|P10599-2|THIO_HUMAN Isoform 2 of Thioredoxin OS=Homo sapiens GN=TXN
Asparagine--tRNA ligase, cytoplasmic OS	NARS	62.942	0.0866086	-0.164729	0.713696	-1.39502	0.187134	355	169360000	53748000	55284000	67489000	22132000	24592000	49575000	18674000	11536000	52294000	12942000	19156000	7	7	7	21.5	19	17.7	14.8	>sp|O43776|SYNC_HUMAN Asparagine--tRNA ligase, cytoplasmic OS=Homo sapiens GN=NARS PE=1 SV=1;>tr|B4DN60|B4DN60_HUMAN cDNA FLJ52703, highly similar to Asparaginyl-tRNA synthetase, cytoplasmic (EC6.1.1.22) OS=Homo sapiens PE=2 SV=1
Thioredoxin reductase 2 isoform 1 variant (Fragment) OS		55.217	0.0858368	-0.011659	0.0432045	-0.101366	0.0231843	580	48502000	16843000	16709000	16165000	6979700	5122300	12010000	3837800	3621500	20327000	6025600	7964800	2	2	3	12.3	9.4	9.4	12.3	>tr|Q59ET7|Q59ET7_HUMAN Thioredoxin reductase 2 isoform 1 variant (Fragment) OS=Homo sapiens PE=2 SV=1;>tr|Q6M1B7|Q6M1B7_HUMAN Putative uncharacterized protein DKFZp781E0833 OS=Homo sapiens GN=DKFZp781E0833 PE=2 SV=1;>tr|B3KUQ5|B3KUQ5_HUMAN cDNA FLJ40389 f
Elongation factor 2 OS	EEF2	95.337	0.0856887	-0.230052	0.776272	-2.01269	0.546265	294	1960500000	631630000	673560000	776990000	212900000	329510000	573860000	287890000	85705000	609640000	130840000	258340000	26	27	24	41.5	34	36	30.7	>sp|P13639|EF2_HUMAN Elongation factor 2 OS=Homo sapiens GN=EEF2 PE=1 SV=4;>tr|Q8TA90|Q8TA90_HUMAN Similar to Elongation factor 2b (Fragment) OS=Homo sapiens PE=2 SV=1;>tr|Q6PK56|Q6PK56_HUMAN EEF2 protein (Fragment) OS=Homo sapiens GN=EEF2 PE=2 SV=1;>tr|B4
cDNA, FLJ92156, Homo sapiens mitochondrial ribosomal protein S18B (MRPS18B),nuclear gene encoding mitochondrial protein, mRNA OS		29.395	0.085106	-0.0372454	-0.0384952	0.215617	-0.288858	529	117460000	40501000	39619000	53205000	21220000	18125000	23852000	7097800	8475500	40399000	12183000	13018000	3	2	4	19.8	19.8	12.4	19.8	>tr|B0S7P4|B0S7P4_HUMAN cDNA, FLJ92156, Homo sapiens mitochondrial ribosomal protein S18B (MRPS18B),nuclear gene encoding mitochondrial protein, mRNA OS=Homo sapiens PE=2 SV=1;>sp|Q9Y676|RT18B_HUMAN 28S ribosomal protein S18b, mitochondrial OS=Homo sapiens
Isoform 4 of ER membrane protein complex subunit 1 OS	EMC1	109.42	0.0840055	0.02722	-0.0695579	0.242328	-0.0911103	631	137400000	46462000	54081000	64620000	18550000	29061000	30137000	8527800	12587000	42641000	19384000	12433000	6	5	5	10.4	8.8	6.8	6.9	>sp|Q8N766-4|EMC1_HUMAN Isoform 4 of ER membrane protein complex subunit 1 OS=Homo sapiens GN=EMC1;>sp|Q8N766-3|EMC1_HUMAN Isoform 3 of ER membrane protein complex subunit 1 OS=Homo sapiens GN=EMC1;>sp|Q8N766-2|EMC1_HUMAN Isoform 2 of ER membrane protein c
Acylpyruvase FAHD1, mitochondrial OS	FAHD1	24.843	0.0834244	-0.0456238	-0.38998	0.0257376	0.227371	515	89585000	33087000	28443000	45254000	21029000	12053000	16381000	4427900	5032400	27950000	7630700	11357000	4	2	2	21	21	12.5	12.5	>sp|Q6P587|FAHD1_HUMAN Acylpyruvase FAHD1, mitochondrial OS=Homo sapiens GN=FAHD1 PE=1 SV=2;>sp|Q6P587-2|FAHD1_HUMAN Isoform 2 of Acylpyruvase FAHD1, mitochondrial OS=Homo sapiens GN=FAHD1;>sp|Q6P587-3|FAHD1_HUMAN Isoform 3 of Acylpyruvase FAHD1, mitochond
cDNA FLJ75526, highly similar to Homo sapiens proliferation-associated 2G4, 38kDa (PA2G4), mRNA (Fragment) OS		40.911	0.0833755	-0.133119	0.583904	-1.16913	0.185867	388	322420000	102790000	116340000	140000000	38551000	60155000	70246000	27333000	14484000	112180000	36911000	41701000	8	7	8	31.1	27.8	24.8	25.9	>tr|A8K6Y1|A8K6Y1_HUMAN cDNA FLJ75526, highly similar to Homo sapiens proliferation-associated 2G4, 38kDa (PA2G4), mRNA (Fragment) OS=Homo sapiens PE=2 SV=1;>tr|Q6PIN5|Q6PIN5_HUMAN PA2G4 protein (Fragment) OS=Homo sapiens GN=PA2G4 PE=2 SV=1;>tr|A0A024RB85|
cDNA FLJ53321, highly similar to Homo sapiens pitrilysin metallopeptidase 1 (PITRM1), mRNA OS		116.29	0.0833518	-0.0130957	-0.0765846	-0.0531494	0.090447	578	635810000	210550000	221500000	311390000	115210000	99630000	116980000	38585000	38825000	207440000	56760000	83048000	22	12	18	28.9	28.9	15.3	20.6	>tr|B4DH07|B4DH07_HUMAN cDNA FLJ53321, highly similar to Homo sapiens pitrilysin metallopeptidase 1 (PITRM1), mRNA OS=Homo sapiens PE=2 SV=1;>tr|B4DRW8|B4DRW8_HUMAN cDNA FLJ54537, highly similar to Homo sapiens pitrilysin metallopeptidase 1 (PITRM1), mRNA
RAB9A, member RAS oncogene family, isoform CRA	RAB9A	22.837	0.0825378	-0.0896037	0.328377	0.210264	-0.807452	437	16228000	4782100	5746200	7463200	2332000	2587600	4192700	1090900	1624000	4572500	1359200	1534500	2	2	2	12.9	12.9	12.9	12.9	>tr|A0A024RBV5|A0A024RBV5_HUMAN RAB9A, member RAS oncogene family, isoform CRA_a OS=Homo sapiens GN=RAB9A PE=3 SV=1;>sp|P51151|RAB9A_HUMAN Ras-related protein Rab-9A OS=Homo sapiens GN=RAB9A PE=1 SV=1
Isoform 10 of Aspartyl/asparaginyl beta-hydroxylase OS	ASPH	83.267	0.0823822	-0.0650869	-0.335554	0.459537	-0.319244	478	1339800000	447140000	476080000	522880000	226450000	155210000	431700000	107560000	191510000	385220000	113130000	129360000	15	15	13	32.8	30.5	27.6	25.2	>sp|Q12797-10|ASPH_HUMAN Isoform 10 of Aspartyl/asparaginyl beta-hydroxylase OS=Homo sapiens GN=ASPH;>sp|Q12797|ASPH_HUMAN Aspartyl/asparaginyl beta-hydroxylase OS=Homo sapiens GN=ASPH PE=1 SV=3
cDNA FLJ52595, highly similar to Medium-chain specific acyl-CoA dehydrogenase, mitochondrial (EC 1.3.99.3) OS		25.663	0.0821194	0.0685331	-0.281439	0.615605	-0.128566	678	41837000	14177000	14639000	16485000	6871200	4710600	13223000	3811700	4953300	12128000	3494400	4974900	2	2	2	10.8	10.8	10.8	10.8	>tr|B4DJE7|B4DJE7_HUMAN cDNA FLJ52595, highly similar to Medium-chain specific acyl-CoA dehydrogenase, mitochondrial (EC 1.3.99.3) OS=Homo sapiens PE=2 SV=1;>tr|B4DVB1|B4DVB1_HUMAN cDNA FLJ50422, highly similar to Medium-chain specific acyl-CoA dehydrogena
Transmembrane protein 43, isoform CRA	TMEM43	44.875	0.0815701	0.0336363	-0.0406008	-0.157383	0.298893	640	102800000	33846000	34624000	37242000	12673000	11374000	42493000	16068000	12625000	23064000	5105200	10625000	4	5	2	22	18.2	22	6.2	>tr|A0A024R2F9|A0A024R2F9_HUMAN Transmembrane protein 43, isoform CRA_a OS=Homo sapiens GN=TMEM43 PE=4 SV=1;>sp|Q9BTV4|TMM43_HUMAN Transmembrane protein 43 OS=Homo sapiens GN=TMEM43 PE=1 SV=1;>tr|Q8TEP9|Q8TEP9_HUMAN FLJ00144 protein (Fragment) OS=Homo sapi
Desmoglein-1 OS	DSG1	113.75	0.0797559	-0.51469	-3.78922	3.50551	-1.26036	84	259100000	118260000	53185000	128320000	111330000	5733200	44126000	1978500	39902000	86649000	4953400	7549800	8	6	8	17.9	13.3	10.5	13.4	>sp|Q02413|DSG1_HUMAN Desmoglein-1 OS=Homo sapiens GN=DSG1 PE=1 SV=2
Enoyl-CoA hydratase, mitochondrial OS	ECHS1	31.387	0.0797107	0.0279916	0.201759	-0.192975	0.0751904	632	404240000	128010000	141020000	149660000	50080000	47928000	137210000	42873000	41843000	117370000	35057000	51248000	7	7	7	40	36.9	35.9	32.8	>sp|P30084|ECHM_HUMAN Enoyl-CoA hydratase, mitochondrial OS=Homo sapiens GN=ECHS1 PE=1 SV=4
Transmembrane emp24-like trafficking protein 10 (Yeast), isoform CRA	TMED10	24.976	0.0790528	0.0214657	0.199625	-0.0890371	-0.0461909	626	422240000	135680000	145610000	191180000	66810000	61808000	108330000	31181000	34844000	122740000	37690000	48955000	6	6	5	33.8	33.8	33.8	32	>tr|A0A024R6I3|A0A024R6I3_HUMAN Transmembrane emp24-like trafficking protein 10 (Yeast), isoform CRA_a OS=Homo sapiens GN=TMED10 PE=3 SV=1;>sp|P49755|TMEDA_HUMAN Transmembrane emp24 domain-containing protein 10 OS=Homo sapiens GN=TMED10 PE=1 SV=2;>tr|Q53GF
40S ribosomal protein S19 OS	RPS19	16.06	0.0787835	-0.145671	0.519139	-1.36866	0.412511	375	77075000	23693000	27141000	46037000	15346000	15925000	9433200	3756300	1809300	21605000	4590000	9407000	5	2	4	33.1	33.1	15.2	28.3	>tr|B0ZBD0|B0ZBD0_HUMAN 40S ribosomal protein S19 OS=Homo sapiens GN=RPS19 PE=2 SV=1;>sp|P39019|RS19_HUMAN 40S ribosomal protein S19 OS=Homo sapiens GN=RPS19 PE=1 SV=2;>tr|Q8WVX7|Q8WVX7_HUMAN Ribosomal protein S19 (Fragment) OS=Homo sapiens PE=2 SV=1;>tr|M
Isoform 2 of 39S ribosomal protein L22, mitochondrial OS	MRPL22	13.734	0.0777818	-0.0340241	-0.0576018	0.227618	-0.272088	536	73963000	25692000	25615000	32090000	13995000	10238000	15216000	4431600	6249700	26656000	7265000	9127200	4	3	5	40.8	30.8	30	40.8	>sp|Q9NWU5-2|RM22_HUMAN Isoform 2 of 39S ribosomal protein L22, mitochondrial OS=Homo sapiens GN=MRPL22;>sp|Q9NWU5-3|RM22_HUMAN Isoform 3 of 39S ribosomal protein L22, mitochondrial OS=Homo sapiens GN=MRPL22;>sp|Q9NWU5|RM22_HUMAN 39S ribosomal protein L22,
Epididymis secretory protein Li 22 OS	HEL-S-22	23.356	0.0775528	-0.12061	0.552869	-1.13106	0.216362	401	394710000	125250000	123060000	130350000	46267000	44448000	138730000	49915000	30397000	125630000	29070000	48214000	6	5	7	58.1	49	44.3	53.3	>tr|V9HWE9|V9HWE9_HUMAN Epididymis secretory protein Li 22 OS=Homo sapiens GN=HEL-S-22 PE=2 SV=1;>sp|P09211|GSTP1_HUMAN Glutathione S-transferase P OS=Homo sapiens GN=GSTP1 PE=1 SV=2;>tr|A8MX94|A8MX94_HUMAN Glutathione S-transferase P OS=Homo sapiens GN=GS
cDNA, FLJ78940, highly similar to Succinyl-CoA ligase (ADP-forming) beta-chain, mitochondrial (EC 6.2.1.5) OS		31.497	0.0773562	-0.0242403	-0.138315	-0.117099	0.182692	557	130760000	42785000	38855000	77372000	21667000	22823000	33364000	15482000	7474100	20019000	5635500	8557900	6	3	3	26.8	26.8	10.7	9.3	>tr|B7Z9S6|B7Z9S6_HUMAN cDNA, FLJ78940, highly similar to Succinyl-CoA ligase (ADP-forming) beta-chain, mitochondrial (EC 6.2.1.5) OS=Homo sapiens PE=2 SV=1;>tr|B4DY87|B4DY87_HUMAN cDNA FLJ54097, highly similar to Succinyl-CoA ligase (ADP-forming) beta-cha
60S ribosomal protein L30 (Fragment) OS	RPL30	12.656	0.0768239	-0.0663937	0.305095	-0.628207	0.123931	475	187920000	56442000	62093000	85515000	26573000	29903000	50288000	16908000	12240000	52122000	12961000	19950000	5	3	4	51.8	51.8	40.4	41.2	>tr|E5RI99|E5RI99_HUMAN 60S ribosomal protein L30 (Fragment) OS=Homo sapiens GN=RPL30 PE=1 SV=1;>tr|A0A024R9D3|A0A024R9D3_HUMAN Ribosomal protein L30, isoform CRA_b OS=Homo sapiens GN=RPL30 PE=4 SV=1;>sp|P62888|RL30_HUMAN 60S ribosomal protein L30 OS=Homo
Arylsulfatase E OS	ARSE	61.077	0.0768079	-0.13206	-1.08746	0.879314	-0.188036	390	76556000	28447000	26503000	29555000	16462000	6014800	29784000	6658600	15226000	17217000	5326700	5261900	2	3	2	6.8	5.1	6.8	5.1	>tr|F5H324|F5H324_HUMAN Arylsulfatase E OS=Homo sapiens GN=ARSE PE=4 SV=1;>tr|B7Z1M0|B7Z1M0_HUMAN cDNA FLJ50116, highly similar to Arylsulfatase E (EC 3.1.6.-) OS=Homo sapiens PE=2 SV=1;>tr|B2R7S0|B2R7S0_HUMAN cDNA, FLJ93576, highly similar to Homo sapiens
Isoform 2 of Tryptophan--tRNA ligase, cytoplasmic OS	WARS	48.851	0.0766509	-0.159139	0.920293	-1.43319	0.0354831	365	62117000	18533000	20848000	18014000	4298100	8046800	23345000	9650400	3060300	20758000	4585100	9740800	3	3	4	19.5	10.9	10.9	15.8	>sp|P23381-2|SYWC_HUMAN Isoform 2 of Tryptophan--tRNA ligase, cytoplasmic OS=Homo sapiens GN=WARS;>tr|A0A024R6K8|A0A024R6K8_HUMAN Tryptophanyl-tRNA synthetase, isoform CRA_a OS=Homo sapiens GN=WARS PE=3 SV=1;>sp|P23381|SYWC_HUMAN Tryptophan--tRNA ligase, c
HCG26477 OS	RPS28	7.8409	0.0754267	-0.123017	0.380619	-1.19952	0.449852	399	108880000	32937000	37435000	55106000	14832000	23234000	44818000	15686000	10370000	8959300	2419300	3831200	4	4	3	56.5	56.5	50.7	52.2	>tr|B2R4R9|B2R4R9_HUMAN HCG26477 OS=Homo sapiens GN=RPS28 PE=2 SV=1;>sp|P62857|RS28_HUMAN 40S ribosomal protein S28 OS=Homo sapiens GN=RPS28 PE=1 SV=1
Isoform 3 of Oxidoreductase HTATIP2 OS	HTATIP2	30.13	0.0748891	-0.0342343	-0.197335	0.267236	-0.172604	535	249730000	83101000	75980000	115660000	37583000	32398000	101450000	36015000	32481000	32615000	9502800	11101000	4	6	4	30.8	20.3	30.8	23.2	>sp|Q9BUP3-3|HTAI2_HUMAN Isoform 3 of Oxidoreductase HTATIP2 OS=Homo sapiens GN=HTATIP2;>tr|E9PI87|E9PI87_HUMAN Oxidoreductase HTATIP2 OS=Homo sapiens GN=HTATIP2 PE=1 SV=1;>sp|Q9BUP3|HTAI2_HUMAN Oxidoreductase HTATIP2 OS=Homo sapiens GN=HTATIP2 PE=1 SV=2;>
MRPS9 protein (Fragment) OS	MRPS9	35.148	0.0731637	-0.0448516	-0.401254	0.298424	-0.0317249	518	152550000	46286000	55838000	58089000	21774000	17017000	34372000	8405400	16083000	60084000	16107000	22737000	5	5	5	22.2	22.2	22.2	22.2	>tr|Q86WV4|Q86WV4_HUMAN MRPS9 protein (Fragment) OS=Homo sapiens GN=MRPS9 PE=2 SV=1;>sp|P82933|RT09_HUMAN 28S ribosomal protein S9, mitochondrial OS=Homo sapiens GN=MRPS9 PE=1 SV=2
Glycogen phosphorylase, brain form OS	PYGB	96.695	0.07308	-0.177989	0.674189	-1.7826	0.574441	337	97788000	29742000	32317000	47367000	12273000	17171000	30541000	12001000	6461800	19881000	5468100	8684300	6	5	5	16.5	14.1	12.6	12.3	>sp|P11216|PYGB_HUMAN Glycogen phosphorylase, brain form OS=Homo sapiens GN=PYGB PE=1 SV=5;>tr|Q59GM9|Q59GM9_HUMAN Alpha-1,4 glucan phosphorylase (Fragment) OS=Homo sapiens PE=2 SV=1;>tr|B4DSD8|B4DSD8_HUMAN Alpha-1,4 glucan phosphorylase OS=Homo sapiens PE
Hydroxysteroid dehydrogenase-like protein 2 OS	HSDL2	45.394	0.0729447	0.013898	-0.111383	0.0688772	0.0842003	618	184510000	57012000	67944000	94353000	32328000	33330000	33103000	8613600	12128000	57049000	16071000	22485000	9	7	7	36.6	30.9	26.1	23.7	>sp|Q6YN16|HSDL2_HUMAN Hydroxysteroid dehydrogenase-like protein 2 OS=Homo sapiens GN=HSDL2 PE=1 SV=1;>tr|B2R923|B2R923_HUMAN cDNA, FLJ94174 OS=Homo sapiens PE=2 SV=1;>tr|A0A024R159|A0A024R159_HUMAN Hydroxysteroid dehydrogenase like 2, isoform CRA_c OS=Hom
Up-regulated during skeletal muscle growth protein 5 OS	USMG5	6.4575	0.0719284	0.0504934	-0.0787769	0.499578	-0.269321	659	181330000	60110000	62783000	66559000	26084000	21576000	49569000	12476000	19514000	65203000	21551000	21693000	2	3	2	29.3	27.6	29.3	27.6	>sp|Q96IX5|USMG5_HUMAN Up-regulated during skeletal muscle growth protein 5 OS=Homo sapiens GN=USMG5 PE=1 SV=1
Dolichyl-diphosphooligosaccharide--protein glycosyltransferase subunit DAD1 OS	DAD1	9.5541	0.0716801	-0.0233659	-0.201029	0.169797	-0.0388656	560	198230000	64849000	71274000	73118000	27394000	23802000	56842000	17356000	21126000	68265000	20099000	26346000	2	2	2	25.9	25.9	25.9	25.9	>tr|F5GXX5|F5GXX5_HUMAN Dolichyl-diphosphooligosaccharide--protein glycosyltransferase subunit DAD1 OS=Homo sapiens GN=DAD1 PE=1 SV=1;>sp|P61803|DAD1_HUMAN Dolichyl-diphosphooligosaccharide--protein glycosyltransferase subunit DAD1 OS=Homo sapiens GN=DAD1
NADH dehydrogenase [ubiquinone] iron-sulfur protein 7, mitochondrial OS	NDUFS7	19.77	0.0714557	0.0441316	-0.349364	0.32964	0.152118	651	161980000	55552000	55390000	77014000	36033000	20820000	38172000	9156800	17837000	46794000	10362000	16733000	3	3	3	17.6	17.6	17.6	17.6	>tr|F5H5N1|F5H5N1_HUMAN NADH dehydrogenase [ubiquinone] iron-sulfur protein 7, mitochondrial OS=Homo sapiens GN=NDUFS7 PE=1 SV=1;>tr|B7Z1U1|B7Z1U1_HUMAN cDNA FLJ60457, highly similar to NADH-ubiquinone oxidoreductase 20 kDa subunit, mitochondrial (EC 1.6.5
39S ribosomal protein L28, mitochondrial OS	MRPL28	30.045	0.0714067	-0.0385282	-0.33743	0.277152	-0.0553064	528	60416000	25843000	17844000	11686000	4180900	3485000	12398000	3891200	4507500	36331000	17771000	9851100	2	2	3	16.8	7.8	14.1	16.8	>tr|Q4TT38|Q4TT38_HUMAN 39S ribosomal protein L28, mitochondrial OS=Homo sapiens GN=MRPL28 PE=1 SV=1;>sp|Q13084|RM28_HUMAN 39S ribosomal protein L28, mitochondrial OS=Homo sapiens GN=MRPL28 PE=1 SV=4;>tr|Q6FHK1|Q6FHK1_HUMAN MRPL28 protein (Fragment) OS=Hom
cDNA FLJ75113 OS		22.964	0.0706942	-0.0801532	0.445621	-0.80138	0.1153	454	64475000	19472000	21841000	33895000	9976100	13440000	19336000	6125200	3804300	11244000	3370300	4597200	3	3	2	21.2	21.2	21.2	16.8	>tr|A8K8G0|A8K8G0_HUMAN cDNA FLJ75113 OS=Homo sapiens PE=2 SV=1;>tr|B7Z958|B7Z958_HUMAN cDNA FLJ53700, highly similar to Hepatoma-derived growth factor OS=Homo sapiens PE=2 SV=1;>sp|P51858-2|HDGF_HUMAN Isoform 2 of Hepatoma-derived growth factor OS=Homo sa
cDNA FLJ52936, weakly similar to Tropomyosin alpha-4 chain OS		17.634	0.068964	-0.0890919	0.539035	-0.89757	0.0912597	438	71177000	24243000	24135000	29870000	9070900	10281000	19667000	8306900	4241000	21640000	6865300	9612900	2	2	2	35.1	35.1	22.1	22.1	>tr|B4DTB1|B4DTB1_HUMAN cDNA FLJ52936, weakly similar to Tropomyosin alpha-4 chain OS=Homo sapiens PE=2 SV=1;>tr|B4DVY2|B4DVY2_HUMAN cDNA FLJ54184, highly similar to Tropomyosin alpha-4 chain OS=Homo sapiens PE=2 SV=1;>tr|V9HW56|V9HW56_HUMAN Epididymis sec
Isoform 3 of NADH dehydrogenase [ubiquinone] 1 beta subcomplex subunit 8, mitochondrial OS	NDUFB8	18.479	0.0685333	0.0536148	-0.368328	0.518535	0.0106367	661	154600000	52064000	53392000	80345000	31964000	23916000	41281000	10448000	17995000	32978000	9652500	11482000	3	2	2	25.2	25.2	19.4	19.4	>sp|O95169-3|NDUB8_HUMAN Isoform 3 of NADH dehydrogenase [ubiquinone] 1 beta subcomplex subunit 8, mitochondrial OS=Homo sapiens GN=NDUFB8;>sp|O95169|NDUB8_HUMAN NADH dehydrogenase [ubiquinone] 1 beta subcomplex subunit 8, mitochondrial OS=Homo sapiens GN=
Neuroblast differentiation-associated protein AHNAK OS	AHNAK	629.09	0.0681639	-0.149569	-1.17153	1.24092	-0.518102	372	908190000	318560000	310520000	368830000	177940000	86121000	255730000	52221000	134470000	283630000	88399000	89931000	36	32	30	24	16.6	16.7	15.8	>sp|Q09666|AHNK_HUMAN Neuroblast differentiation-associated protein AHNAK OS=Homo sapiens GN=AHNAK PE=1 SV=2
Cytochrome c (Fragment) OS	CYCS	11.333	0.0675472	-0.036916	0.0746424	-0.387902	0.202512	530	321090000	103240000	112960000	123330000	39745000	41298000	84839000	28392000	24017000	112920000	35104000	47642000	3	4	5	49.5	31.7	32.7	49.5	>tr|C9JFR7|C9JFR7_HUMAN Cytochrome c (Fragment) OS=Homo sapiens GN=CYCS PE=1 SV=1;>tr|G4XXL9|G4XXL9_HUMAN Cytochrome c OS=Homo sapiens GN=CYCS PE=3 SV=1;>sp|P99999|CYC_HUMAN Cytochrome c OS=Homo sapiens GN=CYCS PE=1 SV=2
Epididymis luminal protein 113 OS	HEL113	53.651	0.0670273	-0.114984	-0.13329	0.868608	-1.08027	407	1356800000	464980000	465300000	506430000	180950000	152350000	396000000	82769000	184680000	454400000	201270000	128260000	20	19	18	54.1	53.4	49.4	47.9	>tr|V9HWE1|V9HWE1_HUMAN Epididymis luminal protein 113 OS=Homo sapiens GN=HEL113 PE=2 SV=1;>sp|P08670|VIME_HUMAN Vimentin OS=Homo sapiens GN=VIM PE=1 SV=4;>tr|B0YJC4|B0YJC4_HUMAN Vimentin OS=Homo sapiens GN=VIM PE=1 SV=1;>tr|Q53HU8|Q53HU8_HUMAN Vimentin va
Serine hydroxymethyltransferase OS	DKFZp686P09201	53.464	0.0663943	-0.0331935	0.0828389	-0.356698	0.174279	538	3829200000	1212500000	1380100000	1870400000	617410000	608960000	742940000	254130000	233540000	1215900000	340910000	537640000	20	19	22	61.5	49.9	47.4	61.5	>tr|Q5HYG8|Q5HYG8_HUMAN Serine hydroxymethyltransferase OS=Homo sapiens GN=DKFZp686P09201 PE=2 SV=1;>tr|A0A024RB99|A0A024RB99_HUMAN Serine hydroxymethyltransferase OS=Homo sapiens GN=SHMT2 PE=3 SV=1;>sp|P34897-3|GLYM_HUMAN Isoform 3 of Serine hydroxymethyl
Exportin-1 OS	XPO1	123.38	0.0658193	-0.133675	0.648557	-1.45732	0.407733	387	146900000	73578000	42189000	42021000	12149000	15786000	25168000	10840000	4491900	79707000	50589000	21911000	5	4	4	10.5	7.1	4.9	4.3	>sp|O14980|XPO1_HUMAN Exportin-1 OS=Homo sapiens GN=XPO1 PE=1 SV=1;>tr|B3KWD0|B3KWD0_HUMAN cDNA FLJ42779 fis, clone BRAWH3005300, highly similar to Exportin-1 OS=Homo sapiens PE=2 SV=1;>tr|B7ZB16|B7ZB16_HUMAN cDNA, FLJ79380, highly similar to Exportin-1 OS
AGPAT5 protein (Fragment) OS	AGPAT5	41.165	0.0657284	-0.0792583	-0.530072	0.708143	-0.415846	456	57338000	18893000	19900000	24955000	10299000	7228800	16093000	3811900	6772800	16290000	4781600	5898900	3	2	2	16	10.1	9.3	7	>tr|Q6NUM7|Q6NUM7_HUMAN AGPAT5 protein (Fragment) OS=Homo sapiens GN=AGPAT5 PE=2 SV=1;>tr|A0A024R640|A0A024R640_HUMAN 1-acylglycerol-3-phosphate O-acyltransferase 5 (Lysophosphatidic acid acyltransferase, epsilon), isoform CRA_a OS=Homo sapiens GN=AGPAT5 P
PCK2 protein OS	PCK2	70.696	0.0655693	0.0501596	0.121148	-0.415018	0.444349	658	188380000	57308000	67162000	104820000	35603000	32846000	26427000	8712200	7007200	57127000	12993000	27309000	9	5	8	19.4	19.4	12	17.2	>tr|Q6IB91|Q6IB91_HUMAN PCK2 protein OS=Homo sapiens GN=PCK2 PE=2 SV=1;>sp|Q16822|PCKGM_HUMAN Phosphoenolpyruvate carboxykinase [GTP], mitochondrial OS=Homo sapiens GN=PCK2 PE=1 SV=3;>tr|B4DW73|B4DW73_HUMAN Phosphoenolpyruvate carboxykinase [GTP], mitochon
cDNA, FLJ95462, highly similar to Homo sapiens fatty-acid-Coenzyme A ligase, long-chain 3 (FACL3),mRNA OS		80.347	0.0646952	-0.029291	0.217479	-0.294898	-0.010454	548	820660000	252950000	294960000	354590000	108620000	123190000	204460000	64185000	62292000	261610000	80146000	109480000	18	16	18	42.5	38.3	34.6	41.9	>tr|B2RBE0|B2RBE0_HUMAN cDNA, FLJ95462, highly similar to Homo sapiens fatty-acid-Coenzyme A ligase, long-chain 3 (FACL3),mRNA OS=Homo sapiens PE=2 SV=1;>tr|A0A024R497|A0A024R497_HUMAN Acyl-CoA synthetase long-chain family member 3, isoform CRA_a OS=Homo s
Isoform 2 of Mitochondrial 2-oxoglutarate/malate carrier protein OS	SLC25A11	28.494	0.064077	0.0376551	-0.234991	0.408821	-0.0608637	645	112020000	35711000	39529000	47764000	16752000	15826000	30944000	9053800	11585000	33310000	9904800	12119000	2	3	3	17.1	12.2	17.1	17.1	>sp|Q02978-2|M2OM_HUMAN Isoform 2 of Mitochondrial 2-oxoglutarate/malate carrier protein OS=Homo sapiens GN=SLC25A11;>tr|I3L1P8|I3L1P8_HUMAN Mitochondrial 2-oxoglutarate/malate carrier protein (Fragment) OS=Homo sapiens GN=SLC25A11 PE=1 SV=1;>tr|Q6IBH0|Q6I
39S ribosomal protein L16, mitochondrial OS	MRPL16	28.449	0.0632635	0.0269201	-0.24996	0.189287	0.141433	630	55757000	17427000	21345000	23399000	8146400	8028300	17687000	4934600	7294200	14671000	4345800	6022600	3	4	3	19.5	11.2	19.5	15.1	>sp|Q9NX20|RM16_HUMAN 39S ribosomal protein L16, mitochondrial OS=Homo sapiens GN=MRPL16 PE=1 SV=1
Glutaredoxin-3 OS	GLRX3	37.432	0.0612077	0.0920616	-0.0983665	-0.646857	1.02141	708	113210000	46954000	26252000	34506000	5182600	4868800	52077000	38664000	4750800	26627000	3107600	16633000	2	3	2	11.6	7.8	11.6	7.8	>sp|O76003|GLRX3_HUMAN Glutaredoxin-3 OS=Homo sapiens GN=GLRX3 PE=1 SV=2
Histone H3 OS	H3F3B	10.334	0.0603926	0.158937	-0.979402	1.84097	-0.384753	755	417260000	136670000	143850000	164420000	70348000	33728000	108340000	16191000	53555000	144500000	50133000	56563000	2	2	2	17.4	17.4	17.4	17.4	>tr|K7EMV3|K7EMV3_HUMAN Histone H3 OS=Homo sapiens GN=H3F3B PE=1 SV=1;>tr|K7EP01|K7EP01_HUMAN Histone H3.3 OS=Homo sapiens GN=H3F3B PE=1 SV=1;>tr|B4E380|B4E380_HUMAN Histone H3 OS=Homo sapiens PE=2 SV=1;>tr|B4DEB1|B4DEB1_HUMAN Histone H3 OS=Homo sapiens GN
Isoform 3 of Leukotriene A-4 hydrolase OS	LTA4H	57.299	0.0597204	-0.0565288	0.214125	-0.672129	0.288418	494	93867000	28342000	26938000	42097000	13505000	13716000	31484000	9941600	6712600	20286000	4895600	6510100	6	5	5	24.8	17.7	13.2	14	>sp|P09960-3|LKHA4_HUMAN Isoform 3 of Leukotriene A-4 hydrolase OS=Homo sapiens GN=LTA4H;>sp|P09960-2|LKHA4_HUMAN Isoform 2 of Leukotriene A-4 hydrolase OS=Homo sapiens GN=LTA4H;>tr|B4DVZ8|B4DVZ8_HUMAN Leukotriene A(4) hydrolase OS=Homo sapiens PE=2 SV=1;>
Caspase 14, apoptosis-related cysteine peptidase OS	CASP14	27.679	0.0596765	-0.285042	-3.06443	2.32043	-0.111118	242	29227000	12856000	8252400	12523000	10935000	891570	9196000	1428700	6870300	7507900	492670	490470	3	2	2	14.9	14.9	10.3	9.1	>tr|B2CIS9|B2CIS9_HUMAN Caspase 14, apoptosis-related cysteine peptidase OS=Homo sapiens GN=CASP14 PE=2 SV=1;>tr|A9UFC0|A9UFC0_HUMAN Caspase 14 OS=Homo sapiens GN=CASP14 PE=2 SV=1;>sp|P31944|CASPE_HUMAN Caspase-14 OS=Homo sapiens GN=CASP14 PE=1 SV=2
Succinate dehydrogenase [ubiquinone] flavoprotein subunit, mitochondrial OS	SDHA	63.566	0.0594909	-0.00773602	0.0465608	-0.0912486	0.0214797	586	740190000	247980000	260080000	341130000	128160000	110210000	160710000	50223000	50896000	238350000	69597000	98974000	13	10	12	38.8	36.7	27.4	33.1	>tr|D6RFM5|D6RFM5_HUMAN Succinate dehydrogenase [ubiquinone] flavoprotein subunit, mitochondrial OS=Homo sapiens GN=SDHA PE=1 SV=1;>sp|P31040-2|SDHA_HUMAN Isoform 2 of Succinate dehydrogenase [ubiquinone] flavoprotein subunit, mitochondrial OS=Homo sapiens
Dihydrolipoyl dehydrogenase OS		48.899	0.0593583	-0.00566034	0.0182068	-0.0672887	0.0321009	592	719770000	207640000	239110000	308070000	77497000	75511000	182520000	72710000	50644000	229180000	57435000	112950000	7	7	7	19.8	19.8	19.8	19.8	>tr|B4DFL1|B4DFL1_HUMAN Dihydrolipoyl dehydrogenase OS=Homo sapiens PE=2 SV=1;>sp|P09622-3|DLDH_HUMAN Isoform 3 of Dihydrolipoyl dehydrogenase, mitochondrial OS=Homo sapiens GN=DLD;>tr|A0A024R713|A0A024R713_HUMAN Dihydrolipoyl dehydrogenase OS=Homo sapiens
Procollagen-lysine,2-oxoglutarate 5-dioxygenase 3 OS	PLOD3	84.784	0.0589382	-0.0157679	0.140517	-0.0270868	-0.160734	575	162270000	50894000	57529000	83494000	25449000	28515000	32317000	10007000	11326000	46457000	15438000	17687000	8	6	6	17.1	13	12.3	10.7	>sp|O60568|PLOD3_HUMAN Procollagen-lysine,2-oxoglutarate 5-dioxygenase 3 OS=Homo sapiens GN=PLOD3 PE=1 SV=1;>tr|B3KQQ3|B3KQQ3_HUMAN cDNA PSEC0016 fis, clone NT2RM1001076, highly similar to Procollagen-lysine,2-oxoglutarate 5-dioxygenase 3 (EC 1.14.11.4) OS
Bifunctional glutamate/proline--tRNA ligase OS	EPRS	170.59	0.0582045	0.0641213	-0.0710575	0.741747	-0.478326	674	95953000	32503000	33986000	48251000	15731000	16223000	10406000	3186200	3584800	37296000	13587000	14178000	7	3	8	8.9	6.5	2.9	7.4	>sp|P07814|SYEP_HUMAN Bifunctional glutamate/proline--tRNA ligase OS=Homo sapiens GN=EPRS PE=1 SV=5;>tr|V9GYZ6|V9GYZ6_HUMAN Bifunctional glutamate/proline--tRNA ligase (Fragment) OS=Homo sapiens GN=EPRS PE=1 SV=1;>tr|Q3KQZ8|Q3KQZ8_HUMAN EPRS protein (Fragm
40S ribosomal protein S12 OS	RPS12	14.515	0.0570411	-0.0953643	0.627794	-1.16023	0.246347	430	257350000	79147000	85826000	92360000	27068000	33871000	83929000	29780000	17824000	81064000	22299000	34131000	3	4	5	56.1	21.2	37.9	39.4	>sp|P25398|RS12_HUMAN 40S ribosomal protein S12 OS=Homo sapiens GN=RPS12 PE=1 SV=3
Leucine-rich PPR-motif containing OS	LRPPRC	157.9	0.0559197	-0.0105395	-0.0865227	-0.0557263	0.11063	581	6426600000	2120200000	2249600000	2920700000	1133900000	904190000	1406000000	406820000	499920000	2099900000	579500000	845440000	50	49	51	47.8	44.8	42.8	45.1	>tr|E5KNY5|E5KNY5_HUMAN Leucine-rich PPR-motif containing OS=Homo sapiens GN=LRPPRC PE=4 SV=1;>sp|P42704|LPPRC_HUMAN Leucine-rich PPR motif-containing protein, mitochondrial OS=Homo sapiens GN=LRPPRC PE=1 SV=3;>tr|B4DSR0|B4DSR0_HUMAN cDNA FLJ60080, highly
Lamin B receptor, isoform CRA	LBR	70.729	0.0543187	0.0750338	-0.53866	0.947629	-0.183867	685	156470000	55609000	52038000	83054000	35020000	21312000	49507000	13232000	22391000	23911000	7356800	8335800	4	4	4	10.4	8.6	7.3	9.1	>tr|A0A024R3R5|A0A024R3R5_HUMAN Lamin B receptor, isoform CRA_a OS=Homo sapiens GN=LBR PE=4 SV=1;>sp|Q14739|LBR_HUMAN Lamin-B receptor OS=Homo sapiens GN=LBR PE=1 SV=2
Pyruvate carboxylase OS	PC	129.63	0.0537262	-0.221438	-2.6092	2.01285	-0.067969	303	12969000000	6388100000	2670900000	7344500000	5666000000	895080000	1687500000	244610000	1155100000	3936700000	477530000	620640000	46	38	46	54.2	53.6	42.9	52.4	>tr|A0A024R5C5|A0A024R5C5_HUMAN Pyruvate carboxylase OS=Homo sapiens GN=PC PE=4 SV=1;>sp|P11498|PYC_HUMAN Pyruvate carboxylase, mitochondrial OS=Homo sapiens GN=PC PE=1 SV=2
Isoform 2 of Alpha-actinin-1 OS	ACTN1	102.71	0.053371	0.079273	0.737514	-0.858541	0.358846	692	1151500000	307810000	434520000	534430000	135910000	222040000	251860000	78077000	50183000	365240000	93829000	162300000	14	14	14	45	41.5	41.5	40	>sp|P12814-2|ACTN1_HUMAN Isoform 2 of Alpha-actinin-1 OS=Homo sapiens GN=ACTN1;>tr|A0A024R694|A0A024R694_HUMAN Actinin, alpha 1, isoform CRA_a OS=Homo sapiens GN=ACTN1 PE=4 SV=1;>sp|P12814|ACTN1_HUMAN Alpha-actinin-1 OS=Homo sapiens GN=ACTN1 PE=1 SV=2;>sp|
28S ribosomal protein S31, mitochondrial OS	MRPS31	45.318	0.0532749	0.036699	-0.406445	0.306029	0.210514	644	65432000	20112000	24793000	22674000	8540800	8150900	18943000	5486200	7565700	23816000	6085000	9076000	2	3	4	14.9	7.6	12.2	14.9	>sp|Q92665|RT31_HUMAN 28S ribosomal protein S31, mitochondrial OS=Homo sapiens GN=MRPS31 PE=1 SV=3
39S ribosomal protein L39, mitochondrial (Fragment) OS	MRPL39	34.032	0.0531654	0.0669901	0.358846	0.581689	-0.739565	676	48933000	17260000	17570000	14979000	5391300	6328300	9813400	2094100	3667400	24141000	9775000	7574300	2	2	3	14.1	9.1	9.1	14.1	>tr|C9JG87|C9JG87_HUMAN 39S ribosomal protein L39, mitochondrial (Fragment) OS=Homo sapiens GN=MRPL39 PE=1 SV=1;>sp|Q9NYK5|RM39_HUMAN 39S ribosomal protein L39, mitochondrial OS=Homo sapiens GN=MRPL39 PE=1 SV=3;>sp|Q9NYK5-2|RM39_HUMAN Isoform 2 of 39S ribo
Epididymis secretory protein Li 84 OS	HEL-S-84	38.89	0.0527991	-0.0328952	0.357608	-0.316851	-0.139442	540	66587000	22337000	23767000	18615000	5980000	5928800	13868000	4659700	4075100	34104000	11697000	13763000	2	2	3	13	9.7	9.7	13	>tr|V9HW95|V9HW95_HUMAN Epididymis secretory protein Li 84 OS=Homo sapiens GN=HEL-S-84 PE=2 SV=1;>sp|Q15293|RCN1_HUMAN Reticulocalbin-1 OS=Homo sapiens GN=RCN1 PE=1 SV=1;>sp|Q15293-2|RCN1_HUMAN Isoform 2 of Reticulocalbin-1 OS=Homo sapiens GN=RCN1
Fatty acyl-CoA reductase 1 (Fragment) OS	FAR1	37.481	0.052798	0.0288098	-0.110869	0.379954	-0.182655	633	38513000	13213000	12219000	13964000	5488700	3887000	10842000	3217100	3752400	13708000	4507500	4580100	2	3	2	10.7	7.5	10.7	7.5	>tr|E9PNW8|E9PNW8_HUMAN Fatty acyl-CoA reductase 1 (Fragment) OS=Homo sapiens GN=FAR1 PE=1 SV=1;>tr|Q9H600|Q9H600_HUMAN cDNA: FLJ22728 fis, clone HSI15617 (Fragment) OS=Homo sapiens PE=2 SV=1;>tr|B2RDG1|B2RDG1_HUMAN cDNA, FLJ96593 OS=Homo sapiens PE=2 SV=1
PEPD protein OS	PEPD	54.582	0.0525179	-0.0687056	0.329066	-0.915691	0.380508	472	358870000	105110000	122050000	195310000	57020000	73183000	69995000	24000000	14284000	93569000	24088000	34582000	10	7	9	28.6	25.4	16.2	22.5	>tr|J3K000|J3K000_HUMAN PEPD protein OS=Homo sapiens GN=PEPD PE=2 SV=1;>sp|P12955|PEPD_HUMAN Xaa-Pro dipeptidase OS=Homo sapiens GN=PEPD PE=1 SV=3;>sp|P12955-3|PEPD_HUMAN Isoform 3 of Xaa-Pro dipeptidase OS=Homo sapiens GN=PEPD;>sp|P12955-2|PEPD_HUMAN Isof
Desmocollin 1, isoform CRA	DSC1	93.834	0.0521065	-0.48719	-5.65355	4.83051	-0.638524	98	119710000	55367000	28662000	55575000	53251000	1720300	27792000	887990	26310000	36346000	1228100	630990	3	2	3	6.7	5.5	3	5	>tr|Q9HB00|Q9HB00_HUMAN Desmocollin 1, isoform CRA_b OS=Homo sapiens GN=DSC1 PE=4 SV=1;>sp|Q08554-2|DSC1_HUMAN Isoform 1B of Desmocollin-1 OS=Homo sapiens GN=DSC1;>sp|Q08554|DSC1_HUMAN Desmocollin-1 OS=Homo sapiens GN=DSC1 PE=1 SV=2
Extended synaptotagmin-2 (Fragment) OS	ESYT2	98.008	0.052102	0.0267444	-0.163381	0.357946	-0.114332	629	170350000	57337000	57404000	73008000	26014000	21063000	49051000	16899000	18812000	48287000	14424000	17529000	10	10	9	27.6	17.5	16.6	17.3	>tr|H7BXI1|H7BXI1_HUMAN Extended synaptotagmin-2 (Fragment) OS=Homo sapiens GN=ESYT2 PE=1 SV=1;>sp|A0FGR8-2|ESYT2_HUMAN Isoform 2 of Extended synaptotagmin-2 OS=Homo sapiens GN=ESYT2;>tr|A0A087WXU3|A0A087WXU3_HUMAN Extended synaptotagmin-2 OS=Homo sapiens
Isoform 2 of Dolichyl-diphosphooligosaccharide--protein glycosyltransferase subunit 2 OS	RPN2	67.723	0.0520717	-0.021991	-0.18996	0.248899	-0.124912	565	955920000	313750000	336600000	313920000	124700000	91095000	286750000	85900000	105100000	355250000	103160000	140410000	13	12	13	34.6	34.6	31.7	34.6	>sp|P04844-2|RPN2_HUMAN Isoform 2 of Dolichyl-diphosphooligosaccharide--protein glycosyltransferase subunit 2 OS=Homo sapiens GN=RPN2;>tr|B2RE46|B2RE46_HUMAN cDNA, FLJ96923, highly similar to Homo sapiens ribophorin II (RPN2), mRNA OS=Homo sapiens PE=2 SV=
cDNA FLJ51929, highly similar to Plastin-3 OS		67.599	0.0513213	-0.0964025	0.531569	-1.31176	0.490981	429	188260000	61944000	62827000	81460000	24799000	32804000	60747000	27788000	11004000	46051000	9356900	19019000	9	9	6	28.2	28.2	26.2	18.9	>tr|B4DPW9|B4DPW9_HUMAN cDNA FLJ51929, highly similar to Plastin-3 OS=Homo sapiens PE=2 SV=1;>tr|Q53GY0|Q53GY0_HUMAN Plastin 3 variant (Fragment) OS=Homo sapiens PE=2 SV=1;>sp|P13797|PLST_HUMAN Plastin-3 OS=Homo sapiens GN=PLS3 PE=1 SV=4;>sp|P13797-3|PLST_
Isoform 4 of Chloride channel CLIC-like protein 1 OS	CLCC1	39.837	0.0512178	-0.0878021	-0.796661	1.00554	-0.472289	442	30801000	9731600	11124000	9699300	3810400	2363100	10497000	2602600	5469000	10605000	3318600	3292200	3	3	3	16.4	16.4	16.4	16.4	>sp|Q96S66-4|CLCC1_HUMAN Isoform 4 of Chloride channel CLIC-like protein 1 OS=Homo sapiens GN=CLCC1;>sp|Q96S66-3|CLCC1_HUMAN Isoform 3 of Chloride channel CLIC-like protein 1 OS=Homo sapiens GN=CLCC1;>tr|A0A024R095|A0A024R095_HUMAN Chloride channel CLIC-li
RNA-binding protein Musashi homolog 2 OS	MSI2	35.196	0.0503891	-0.0234418	0.0805212	-0.319874	0.169027	559	55122000	17686000	18496000	27517000	9908300	8917200	7823200	2685600	2178900	19781000	5092500	7400300	5	3	5	27.4	23.8	15.2	23.8	>sp|Q96DH6|MSI2H_HUMAN RNA-binding protein Musashi homolog 2 OS=Homo sapiens GN=MSI2 PE=1 SV=1;>sp|Q96DH6-2|MSI2H_HUMAN Isoform 2 of RNA-binding protein Musashi homolog 2 OS=Homo sapiens GN=MSI2;>tr|B4DHE8|B4DHE8_HUMAN Protein turtle homolog B OS=Homo sapi
Matrin-3 OS	MATR3	94.622	0.0501527	-0.136691	-1.02735	1.62518	-1.0079	385	364010000	132850000	146070000	126300000	59877000	27994000	132390000	23527000	86528000	105320000	49448000	31549000	9	9	7	22.3	15.5	16.1	12.5	>sp|P43243|MATR3_HUMAN Matrin-3 OS=Homo sapiens GN=MATR3 PE=1 SV=2;>tr|A8MXP9|A8MXP9_HUMAN Matrin-3 OS=Homo sapiens GN=MATR3 PE=1 SV=1;>tr|D6REM6|D6REM6_HUMAN Matrin-3 OS=Homo sapiens GN=MATR3 PE=1 SV=1;>tr|Q68D11|Q68D11_HUMAN Putative uncharacterized prot
Desmoglein-2 OS	DSG2	122.29	0.0500531	0.0540027	0.319734	0.479541	-0.637267	662	13525000	4141000	4897000	3776400	1190000	1089300	5128900	1241400	2337100	4620200	1709600	1470600	2	2	2	3.1	3.1	3.1	3.1	>sp|Q14126|DSG2_HUMAN Desmoglein-2 OS=Homo sapiens GN=DSG2 PE=1 SV=2
Isoform 2 of ATP synthase subunit d, mitochondrial OS	ATP5H	15.773	0.049975	-0.0100518	-0.138537	0.0370308	0.0713507	583	211000000	65728000	70595000	68334000	25387000	18407000	92702000	25469000	32765000	49968000	14873000	19423000	4	5	3	54.7	43.1	54.7	30.7	>sp|O75947-2|ATP5H_HUMAN Isoform 2 of ATP synthase subunit d, mitochondrial OS=Homo sapiens GN=ATP5H;>sp|O75947|ATP5H_HUMAN ATP synthase subunit d, mitochondrial OS=Homo sapiens GN=ATP5H PE=1 SV=3;>tr|F5H608|F5H608_HUMAN ATP synthase subunit d, mitochondri
Retinol dehydrogenase 11 OS	RDH11	35.386	0.0478765	-0.0438139	0.503145	-0.509738	-0.124849	521	665870000	215450000	241280000	291340000	88171000	104880000	147070000	48735000	41862000	227460000	78546000	94533000	6	7	6	31.1	25.8	27	22	>sp|Q8TC12|RDH11_HUMAN Retinol dehydrogenase 11 OS=Homo sapiens GN=RDH11 PE=1 SV=2;>sp|Q8TC12-2|RDH11_HUMAN Isoform 2 of Retinol dehydrogenase 11 OS=Homo sapiens GN=RDH11;>tr|G3V2G6|G3V2G6_HUMAN Retinol dehydrogenase 11 (Fragment) OS=Homo sapiens GN=RDH11
cDNA FLJ76156, highly similar to Homo sapiens aspartyl-tRNA synthetase 2 (DARS2), mRNA OS		73.574	0.0450227	-0.0125026	-0.190668	0.0882773	0.0648829	579	606220000	203780000	208770000	284130000	113280000	87068000	129030000	37872000	46454000	193060000	52627000	75253000	10	11	12	30.2	20	21.2	26.5	>tr|A8K4A8|A8K4A8_HUMAN cDNA FLJ76156, highly similar to Homo sapiens aspartyl-tRNA synthetase 2 (DARS2), mRNA OS=Homo sapiens PE=2 SV=1;>tr|A0A024R8Z9|A0A024R8Z9_HUMAN Aspartyl-tRNA synthetase 2 (Mitochondrial), isoform CRA_b OS=Homo sapiens GN=DARS2 PE=3
Propionyl-CoA carboxylase beta chain, mitochondrial OS	PCCB	58.215	0.0440129	-0.176857	-2.50332	1.9584	0.0143553	339	217380000	112660000	38226000	138170000	100050000	18011000	12095000	2120400	7361000	67119000	10490000	12854000	8	2	5	24.7	22.3	7.1	15.2	>sp|P05166|PCCB_HUMAN Propionyl-CoA carboxylase beta chain, mitochondrial OS=Homo sapiens GN=PCCB PE=1 SV=3;>tr|E9PDR0|E9PDR0_HUMAN Propionyl-CoA carboxylase beta chain, mitochondrial OS=Homo sapiens GN=PCCB PE=1 SV=1;>tr|Q59GV0|Q59GV0_HUMAN Propionyl Coen
Isoform 3 of Pyruvate dehydrogenase protein X component, mitochondrial OS	PDHX	51.459	0.0438382	0.0186598	-0.138839	-0.0963139	0.291132	624	50407000	15857000	18346000	16864000	5691700	5730300	16590000	4993400	5756000	16953000	5171800	6859700	3	3	3	10.5	8.4	8.6	7.4	>sp|O00330-3|ODPX_HUMAN Isoform 3 of Pyruvate dehydrogenase protein X component, mitochondrial OS=Homo sapiens GN=PDHX;>tr|B2R673|B2R673_HUMAN cDNA, FLJ92818, highly similar to Homo sapiens pyruvate dehydrogenase complex, component X (PDHX), mRNA OS=Homo s
Isoform 3 of Glutaminase kidney isoform, mitochondrial OS	GLS	65.459	0.0430812	0.0326055	0.485633	-0.0412984	-0.346518	638	188860000	56617000	67823000	81687000	27558000	30048000	59543000	14696000	20681000	47634000	14364000	17095000	6	6	6	18.2	15.9	15.9	16.6	>sp|O94925-3|GLSK_HUMAN Isoform 3 of Glutaminase kidney isoform, mitochondrial OS=Homo sapiens GN=GLS;>tr|A8K132|A8K132_HUMAN cDNA FLJ75476, highly similar to Homo sapiens glutaminase (GLS), mRNA OS=Homo sapiens PE=2 SV=1;>sp|O94925|GLSK_HUMAN Glutaminase
Serine--tRNA ligase, mitochondrial OS	SARS2	58.182	0.0430316	0.0237274	-0.323173	0.135535	0.25882	627	115500000	40346000	39728000	48646000	19452000	14596000	39704000	14264000	13861000	27154000	6629800	11271000	4	7	5	23.7	11.4	18.9	15.8	>tr|M0QWZ7|M0QWZ7_HUMAN Serine--tRNA ligase, mitochondrial OS=Homo sapiens GN=SARS2 PE=1 SV=1;>sp|Q9NP81|SYSM_HUMAN Serine--tRNA ligase, mitochondrial OS=Homo sapiens GN=SARS2 PE=1 SV=1;>tr|B4DXB9|B4DXB9_HUMAN cDNA FLJ58300, highly similar to Seryl-tRNA sy
cDNA FLJ78586, highly similar to Homo sapiens VAMP (vesicle-associated membrane protein)-associated protein A, 33kDa (VAPA), mRNA OS		27.317	0.0429726	0.0395822	-0.342067	0.621806	-0.160992	648	162480000	51061000	60230000	40603000	17342000	11130000	49164000	12783000	21677000	72713000	20936000	27423000	2	3	3	25.6	17.4	25.6	25.6	>tr|A8KA83|A8KA83_HUMAN cDNA FLJ78586, highly similar to Homo sapiens VAMP (vesicle-associated membrane protein)-associated protein A, 33kDa (VAPA), mRNA OS=Homo sapiens PE=2 SV=1;>sp|Q9P0L0|VAPA_HUMAN Vesicle-associated membrane protein-associated protein
Rho-related GTP-binding protein RhoF OS	RHOF	23.625	0.0407413	-0.0170468	-0.258339	0.00230651	0.204892	572	26992000	9515000	9151000	12092000	4639500	3505600	7533800	2762000	2756400	7366000	2113600	2888900	2	2	2	26.1	16.6	18	16.6	>sp|Q9HBH0|RHOF_HUMAN Rho-related GTP-binding protein RhoF OS=Homo sapiens GN=RHOF PE=1 SV=1;>tr|F5GXB1|F5GXB1_HUMAN Rho-related GTP-binding protein RhoF (Fragment) OS=Homo sapiens GN=RHOF PE=1 SV=1;>tr|A8K0B7|A8K0B7_HUMAN cDNA FLJ75043, highly similar to
cDNA FLJ56075, highly similar to Thioredoxin reductase 1, cytoplasmic (EC 1.8.1.9) OS		60.021	0.0390218	-0.0668367	0.593784	-1.15438	0.360083	473	1996400000	573640000	686830000	714330000	212620000	275510000	657420000	214030000	140390000	624620000	146990000	270930000	14	15	17	56.3	42.2	43.7	51.9	>tr|B7Z2S5|B7Z2S5_HUMAN cDNA FLJ56075, highly similar to Thioredoxin reductase 1, cytoplasmic (EC 1.8.1.9) OS=Homo sapiens PE=2 SV=1;>tr|A0A087WSW9|A0A087WSW9_HUMAN Glycosyl-phosphatidylinositol-anchored molecule-like protein OS=Homo sapiens GN=GML PE=4 SV
Isoform 3 of Proteasome activator complex subunit 1 OS	PSME1	26.87	0.0379771	-0.0344891	-0.60235	0.145221	0.353662	534	74471000	18927000	32171000	20095000	7685600	6314600	29535000	5833400	17888000	24841000	5407700	7968500	2	3	4	19.7	10.7	14.2	19.7	>sp|Q06323-3|PSME1_HUMAN Isoform 3 of Proteasome activator complex subunit 1 OS=Homo sapiens GN=PSME1;>tr|Q6FHU3|Q6FHU3_HUMAN PSME1 protein (Fragment) OS=Homo sapiens GN=PSME1 PE=2 SV=1;>sp|Q06323|PSME1_HUMAN Proteasome activator complex subunit 1 OS=Homo
Microsomal glutathione S-transferase 1 (Fragment) OS	MGST1	8.8863	0.0379294	-0.0156033	-0.0739702	0.235605	-0.208444	576	490500000	178030000	191650000	219370000	91773000	73364000	147960000	44594000	65747000	123170000	41661000	52541000	3	2	2	39	39	32.5	32.5	>tr|F5H7F6|F5H7F6_HUMAN Microsomal glutathione S-transferase 1 (Fragment) OS=Homo sapiens GN=MGST1 PE=1 SV=1;>tr|F5H6X2|F5H6X2_HUMAN Microsomal glutathione S-transferase 1 (Fragment) OS=Homo sapiens GN=MGST1 PE=1 SV=1;>sp|P10620-2|MGST1_HUMAN Isoform 2 of
cDNA FLJ77343, highly similar to Homo sapiens electron-transfer-flavoprotein, beta polypeptide(ETFB), mRNA OS		27.921	0.0375683	0.0118534	-0.167669	0.0221902	0.181039	615	702950000	242640000	208560000	287600000	182180000	56980000	147120000	18088000	102640000	268230000	42365000	48938000	7	5	6	32.2	32.2	22.4	25.5	>tr|A8K766|A8K766_HUMAN cDNA FLJ77343, highly similar to Homo sapiens electron-transfer-flavoprotein, beta polypeptide(ETFB), mRNA OS=Homo sapiens PE=2 SV=1;>sp|P38117|ETFB_HUMAN Electron transfer flavoprotein subunit beta OS=Homo sapiens GN=ETFB PE=1 SV=3
Epididymis secretory sperm binding protein Li 97n OS	HEL-S-97n	30.54	0.0368339	-0.0171383	0.253626	-0.258373	-0.0466677	571	1047900000	325660000	388900000	426870000	138190000	150060000	306400000	93372000	106370000	314620000	94099000	132460000	7	6	8	56.5	39.5	34.7	51.7	>tr|V9HW63|V9HW63_HUMAN Epididymis secretory sperm binding protein Li 97n OS=Homo sapiens GN=HEL-S-97n PE=2 SV=1;>sp|Q13162|PRDX4_HUMAN Peroxiredoxin-4 OS=Homo sapiens GN=PRDX4 PE=1 SV=1;>tr|H7C3T4|H7C3T4_HUMAN Peroxiredoxin-4 (Fragment) OS=Homo sapiens GN
cDNA, FLJ92992, highly similar to Homo sapiens methylmalonyl Coenzyme A mutase (MUT), nuclear gene encoding mitochondrial protein, mRNA OS		83.031	0.0361096	-0.0540568	-0.9657	0.648557	0.154972	500	76910000	29290000	24453000	42503000	21464000	10474000	8748500	2490300	3969600	25659000	5335600	10009000	7	2	6	11.2	11.2	3.2	9.2	>tr|B2R6K1|B2R6K1_HUMAN cDNA, FLJ92992, highly similar to Homo sapiens methylmalonyl Coenzyme A mutase (MUT), nuclear gene encoding mitochondrial protein, mRNA OS=Homo sapiens PE=2 SV=1;>tr|A0A024RD82|A0A024RD82_HUMAN Methylmalonyl Coenzyme A mutase, isofo
Isoform 2 of Dehydrogenase/reductase SDR family member 7 OS	DHRS7	32.267	0.0349101	-0.0261689	0.444879	-0.330592	-0.192793	554	140840000	39990000	57724000	73453000	19175000	32207000	40336000	11601000	14317000	27055000	9213700	11200000	5	5	5	26.6	22.8	22.8	22.8	>sp|Q9Y394-2|DHRS7_HUMAN Isoform 2 of Dehydrogenase/reductase SDR family member 7 OS=Homo sapiens GN=DHRS7;>sp|Q9Y394|DHRS7_HUMAN Dehydrogenase/reductase SDR family member 7 OS=Homo sapiens GN=DHRS7 PE=1 SV=1;>tr|A0A087X0Z7|A0A087X0Z7_HUMAN Dehydrogenase/r
Isoform 2 of Phosphatidylinositol glycan anchor biosynthesis class U protein OS	PIGU	47.61	0.0346179	0.0167511	0.143524	0.196733	-0.290004	620	90156000	27368000	33302000	24971000	8592900	8431900	37004000	10224000	14420000	28181000	8550500	10451000	2	2	2	6.5	6.5	6.5	6.5	>sp|Q9H490-2|PIGU_HUMAN Isoform 2 of Phosphatidylinositol glycan anchor biosynthesis class U protein OS=Homo sapiens GN=PIGU;>sp|Q9H490|PIGU_HUMAN Phosphatidylinositol glycan anchor biosynthesis class U protein OS=Homo sapiens GN=PIGU PE=1 SV=3;>tr|B4DXB6|
Endoplasmic reticulum resident protein 44 OS	ERP44	46.971	0.0341767	0.0172777	0.223052	-0.30004	0.128821	621	125140000	41149000	41384000	71735000	23961000	24209000	39153000	12974000	11470000	14252000	4213100	5705500	4	4	2	13.3	13.3	13.3	7.1	>sp|Q9BS26|ERP44_HUMAN Endoplasmic reticulum resident protein 44 OS=Homo sapiens GN=ERP44 PE=1 SV=1
Oxygen-dependent coproporphyrinogen-III oxidase, mitochondrial OS	CPOX	50.151	0.0334406	0.0095358	-0.16524	0.0546401	0.139208	614	170340000	54716000	62092000	86908000	31154000	30105000	28264000	8302300	10033000	55170000	15260000	21955000	7	5	5	19.4	19.4	11.7	14.5	>sp|P36551|HEM6_HUMAN Oxygen-dependent coproporphyrinogen-III oxidase, mitochondrial OS=Homo sapiens GN=CPOX PE=1 SV=3
Isoform 2 of Prohibitin-2 OS	PHB2	29.043	0.0329226	0.0193008	-0.0712697	-0.248673	0.377846	625	47587000	15309000	15972000	22017000	6418500	6412400	8476300	2909500	2416100	17094000	5980800	7143700	3	2	3	25.3	14.2	8	15.3	>sp|Q99623-2|PHB2_HUMAN Isoform 2 of Prohibitin-2 OS=Homo sapiens GN=PHB2;>tr|J3KPX7|J3KPX7_HUMAN Prohibitin-2 OS=Homo sapiens GN=PHB2 PE=1 SV=2;>sp|Q99623|PHB2_HUMAN Prohibitin-2 OS=Homo sapiens GN=PHB2 PE=1 SV=2;>tr|B4DW05|B4DW05_HUMAN cDNA FLJ60175, hig
Endoplasmic reticulum metallopeptidase 1 OS	ERMP1	100.23	0.0317398	-0.0267781	-0.286357	0.509138	-0.303116	552	117450000	39717000	40255000	56619000	22345000	16953000	21643000	5749400	9237600	39193000	11623000	14065000	5	3	4	8	6.6	3.8	4.6	>sp|Q7Z2K6|ERMP1_HUMAN Endoplasmic reticulum metallopeptidase 1 OS=Homo sapiens GN=ERMP1 PE=1 SV=2;>tr|E7ER77|E7ER77_HUMAN Endoplasmic reticulum metallopeptidase 1 OS=Homo sapiens GN=ERMP1 PE=1 SV=1;>tr|D3DRI3|D3DRI3_HUMAN KIAA1815, isoform CRA_a OS=Homo s
Fatty acid desaturase 1 OS	FADS1	51.964	0.0316444	-0.0816143	-0.409719	1.47259	-1.30772	451	51043000	17575000	18068000	31972000	13257000	10541000	9333100	1560700	5018500	9737900	2756700	2509100	5	2	2	18.5	18.5	8.6	8.6	>sp|O60427|FADS1_HUMAN Fatty acid desaturase 1 OS=Homo sapiens GN=FADS1 PE=1 SV=3;>tr|H7C2V0|H7C2V0_HUMAN Fatty acid desaturase 1 (Fragment) OS=Homo sapiens GN=FADS1 PE=1 SV=1
Isoform 2 of Propionyl-CoA carboxylase alpha chain, mitochondrial OS	PCCA	77.047	0.0313019	-0.186693	-3.54143	3.01337	-0.0320199	327	1275900000	707080000	235710000	801520000	653890000	88600000	180870000	25772000	108550000	293480000	27412000	38558000	24	16	22	53.8	41.5	31.1	38	>sp|P05165-2|PCCA_HUMAN Isoform 2 of Propionyl-CoA carboxylase alpha chain, mitochondrial OS=Homo sapiens GN=PCCA;>sp|P05165|PCCA_HUMAN Propionyl-CoA carboxylase alpha chain, mitochondrial OS=Homo sapiens GN=PCCA PE=1 SV=4;>tr|B2RDE0|B2RDE0_HUMAN cDNA, FLJ
[truncated: 48 more rows]
